# Supplementary material for: Stat5b Regulates Sexually Dimorphic Gene Expression in Zebrafish Liver
Source: Front Physiol. 2018 May 31;9:676. doi: 10.3389/fphys.2018.00676 (PMC5990605; doi:10.3389/fphys.2018.00676)
Supplement: TABLE S6 — Detailed information of candidate genes related to growth traits in both sexes. [file Table_6.XLSX]

## Sheet: Female.length.geneInfo
	substanceBXH	geneSymbol	moduleColor	GS.length	p.GS.length	MM.turquoise	p.MM.turquoise	MM.blue	p.MM.blue	MM.yellow	p.MM.yellow	MM.brown	p.MM.brown	MM.red	p.MM.red	MM.green	p.MM.green	MM.grey	p.MM.grey
ENSDARG00000000001	ENSDARG00000000001	slc35a5	blue	-0.816101	0.0476186	0.644648	0.166977	-0.872379	0.0233915	0.939977	0.00529598	0.643144	0.168297	-0.620046	0.189121	-0.165229	0.754412	0.407749	0.422272
ENSDARG00000001057	ENSDARG00000001057	bysl	blue	0.836643	0.0378485	-0.701288	0.120516	0.950781	0.00357422	-0.846106	0.0337025	-0.65554	0.157544	0.309139	0.551063	0.492242	0.321272	0.0255884	0.961626
ENSDARG00000001712	ENSDARG00000001712	si:ch211-247n2.1	blue	0.950763	0.00357681	-0.871015	0.0238828	0.940108	0.00527308	-0.782958	0.0655489	-0.785348	0.0641682	0.471762	0.344854	0.454037	0.365745	0.136508	0.79651
ENSDARG00000001754	ENSDARG00000001754	noc2l	blue	0.835951	0.0381608	-0.646852	0.165049	0.989343	0.000169758	-0.754486	0.0830164	-0.72788	0.100999	0.280138	0.590785	0.379968	0.457477	0.0923601	0.861854
ENSDARG00000001879	ENSDARG00000001879	nav2b	blue	0.838468	0.0370313	-0.591533	0.216193	0.933428	0.00650028	-0.678444	0.138473	-0.72022	0.106465	0.464728	0.353092	-0.0589423	0.911689	-0.0950134	0.857909
ENSDARG00000002385	ENSDARG00000002385	atm	blue	0.783289	0.0653567	-0.626081	0.183584	0.943641	0.00467502	-0.786219	0.0636682	-0.748085	0.0871982	0.303547	0.558665	0.526129	0.283626	0.0389202	0.941649
ENSDARG00000002402	ENSDARG00000002402	ercc3	blue	0.764977	0.0763631	-0.587155	0.220479	0.948693	0.00388103	-0.770436	0.0730005	-0.574028	0.233531	0.144688	0.784483	0.438535	0.384365	0.09145	0.863207
ENSDARG00000002487	ENSDARG00000002487	noc3l	blue	0.803263	0.0542509	-0.641766	0.169511	0.951824	0.0034255	-0.694143	0.126017	-0.828804	0.0414535	0.30689	0.554116	0.49267	0.320786	0.150671	0.775704
ENSDARG00000002720	ENSDARG00000002720	utp15	blue	0.770598	0.0729015	-0.527051	0.282626	0.977898	0.000727346	-0.678982	0.138038	-0.698093	0.122962	0.213623	0.68444	0.246978	0.637066	0.0780445	0.883171
ENSDARG00000002745	ENSDARG00000002745	tdh	blue	0.657837	0.155584	-0.439067	0.383721	0.851084	0.0316128	-0.890197	0.0174232	-0.539072	0.269719	0.380052	0.457369	0.243924	0.641371	-0.38472	0.451392
ENSDARG00000003750	ENSDARG00000003750	pfas	blue	0.857173	0.0291426	-0.790129	0.0614468	0.897624	0.0151849	-0.641975	0.169327	-0.808803	0.0513399	0.308881	0.551413	0.599253	0.208718	0.330184	0.522723
ENSDARG00000004111	ENSDARG00000004111	esr1	blue	0.907928	0.0123256	-0.775098	0.0701836	0.869532	0.0244226	-0.783577	0.0651896	-0.863656	0.0266171	0.74844	0.0869638	0.14386	0.785699	-0.197485	0.707624
ENSDARG00000004115	ENSDARG00000004115	mgat4b	blue	0.859466	0.0282371	-0.721435	0.10559	0.889293	0.0177055	-0.438563	0.384331	-0.726811	0.101754	0.220878	0.674071	0.19934	0.704951	0.453779	0.366052
ENSDARG00000004141	ENSDARG00000004141	zgc:92630	blue	0.768081	0.0744424	-0.496316	0.316655	0.931622	0.00685355	-0.699584	0.121818	-0.532857	0.276364	0.26884	0.606456	-0.0552361	0.91723	-0.0930437	0.860837
ENSDARG00000004218	ENSDARG00000004218	rnd1b	blue	0.45921	0.359603	-0.311989	0.5472	0.595682	0.212162	-0.592498	0.215252	0.101696	0.847982	-0.155457	0.768693	0.0440602	0.933953	-0.0353352	0.947019
ENSDARG00000004774	ENSDARG00000004774	wdr36	blue	0.781218	0.0665623	-0.55887	0.248973	0.978039	0.000718155	-0.652413	0.160228	-0.72479	0.103189	0.191044	0.716921	0.318157	0.538868	0.163221	0.757343
ENSDARG00000004948	ENSDARG00000004948	bccip	blue	0.882639	0.0198522	-0.673606	0.142414	0.974026	0.00100322	-0.827077	0.0422682	-0.715939	0.109576	0.484634	0.329961	0.14076	0.790254	-0.140352	0.790855
ENSDARG00000005057	ENSDARG00000005057	dimt1l	blue	0.7109	0.113287	-0.582969	0.224609	0.588542	0.219118	-0.680893	0.136497	-0.606592	0.20171	0.876799	0.0218327	-0.274829	0.598135	-0.540928	0.267746
ENSDARG00000005772	ENSDARG00000005772	tsr2	blue	0.727795	0.101059	-0.55461	0.253382	0.928071	0.00757461	-0.697621	0.123326	-0.760842	0.078955	0.218037	0.678127	0.536444	0.272521	0.121021	0.819354
ENSDARG00000006062	ENSDARG00000006062	akap1b	blue	0.848925	0.0325115	-0.635272	0.17528	0.985406	0.000317939	-0.631252	0.178893	-0.734691	0.096246	0.254768	0.626116	0.210999	0.688198	0.194788	0.711513
ENSDARG00000006200	ENSDARG00000006200	eif4g1a	blue	0.843546	0.034802	-0.634446	0.17602	0.995498	3.03591e-05	-0.764139	0.076885	-0.713506	0.11136	0.308472	0.551969	0.288871	0.578746	0.0377011	0.943475
ENSDARG00000006215	ENSDARG00000006215	akr1b1	blue	0.663894	0.150466	-0.53142	0.277908	0.642139	0.169182	-0.127182	0.810255	-0.410113	0.41932	0.0331464	0.950299	-0.173138	0.742888	0.544677	0.26378
ENSDARG00000006219	ENSDARG00000006219	gnl3	blue	0.916921	0.0100664	-0.720195	0.106483	0.957847	0.0026279	-0.75734	0.0811812	-0.776372	0.0694228	0.549347	0.258872	0.0702897	0.894739	-0.0815443	0.877955
ENSDARG00000006447	ENSDARG00000006447	slc19a3a	blue	0.756352	0.0818143	-0.505086	0.306798	0.935139	0.00617392	-0.590712	0.216994	-0.509837	0.301507	0.0919777	0.862423	0.0487874	0.926877	0.158151	0.764751
ENSDARG00000007184	ENSDARG00000007184	zbtb16a	blue	0.619846	0.189306	-0.371159	0.468827	0.728223	0.100757	-0.265658	0.610888	-0.351298	0.49473	0.0121978	0.981704	-0.316101	0.541641	0.27434	0.598814
ENSDARG00000007744	ENSDARG00000007744	tsr1	blue	0.876313	0.0220014	-0.667026	0.147849	0.982111	0.000477154	-0.788802	0.0621968	-0.773249	0.0712945	0.466224	0.351334	0.190795	0.71728	-0.0769496	0.884803
ENSDARG00000007918	ENSDARG00000007918	ttc27	blue	0.73994	0.0926527	-0.598128	0.2098	0.917166	0.010008	-0.644256	0.16732	-0.731623	0.0983739	0.141474	0.789205	0.593961	0.21383	0.266584	0.609597
ENSDARG00000008133	ENSDARG00000008133	foxl1	blue	0.545304	0.263119	-0.458924	0.359941	0.739248	0.0931228	-0.54129	0.267363	-0.343307	0.505271	-0.196049	0.709694	0.652904	0.159805	0.377003	0.461287
ENSDARG00000008740	ENSDARG00000008740	esf1	blue	0.831019	0.0404195	-0.5872	0.220435	0.975123	0.000920603	-0.6972	0.12365	-0.750039	0.0859118	0.376065	0.462495	0.108242	0.838271	-0.0134414	0.979839
ENSDARG00000008835	ENSDARG00000008835	A2ML1 (1 of many)	blue	0.449014	0.371743	-0.226528	0.666021	0.583886	0.223701	0.012739	0.980893	-0.29641	0.568406	-0.20877	0.691394	-0.268641	0.606733	0.530551	0.278845
ENSDARG00000008976	ENSDARG00000008976	mdn1	blue	0.812568	0.0494037	-0.638681	0.172242	0.965332	0.00178201	-0.824355	0.0435675	-0.717062	0.108756	0.330726	0.521998	0.441384	0.38092	-0.0178471	0.973232
ENSDARG00000009825	ENSDARG00000009825	mmp23bb	blue	0.900384	0.0143909	-0.725852	0.102433	0.988865	0.000185278	-0.686847	0.131743	-0.719364	0.107084	0.294318	0.57127	0.270124	0.60467	0.200863	0.702758
ENSDARG00000010070	ENSDARG00000010070	adam9	blue	-0.920705	0.0091822	0.807188	0.0521807	-0.851689	0.0313631	0.808852	0.0513141	0.8365	0.0379131	-0.782165	0.0660097	-0.140034	0.791322	0.227134	0.665158
ENSDARG00000010194	ENSDARG00000010194	eif4bb	blue	0.874133	0.0227666	-0.653785	0.159047	0.981794	0.000494162	-0.666236	0.148508	-0.764584	0.0766077	0.370934	0.469118	0.124109	0.814793	0.0863215	0.870839
ENSDARG00000010905	ENSDARG00000010905	mettl13	blue	0.913684	0.0108542	-0.735401	0.0957566	0.99144	0.000109593	-0.700141	0.121392	-0.781855	0.0661903	0.376951	0.461355	0.250352	0.632317	0.146164	0.782315
ENSDARG00000011373	ENSDARG00000011373	mknk2a	blue	0.810403	0.050513	-0.57754	0.23001	0.911264	0.0114618	-0.498012	0.314739	-0.608776	0.199645	0.209197	0.690782	-0.0579279	0.913205	0.224171	0.669376
ENSDARG00000012044	ENSDARG00000012044	polr3gla	blue	0.932194	0.00674051	-0.784566	0.0646182	0.943172	0.00475241	-0.878894	0.021112	-0.76568	0.075926	0.621511	0.18777	0.220935	0.67399	-0.176679	0.737739
ENSDARG00000012113	ENSDARG00000012113	c19h1orf109	blue	0.75177	0.0847795	-0.523819	0.286136	0.968592	0.00146424	-0.736561	0.0949588	-0.625659	0.183968	0.171902	0.744686	0.320812	0.535291	0.0451036	0.93239
ENSDARG00000012234	ENSDARG00000012234	psme3	blue	0.759418	0.0798568	-0.507165	0.304478	0.963076	0.00201993	-0.584554	0.223041	-0.657266	0.15607	0.136766	0.796131	0.16451	0.755462	0.183407	0.727974
ENSDARG00000012388	ENSDARG00000012388	cox4i1l	blue	-0.730067	0.0994612	0.519833	0.290487	-0.821531	0.0449345	0.907131	0.0125366	0.536102	0.272886	-0.572171	0.235403	-0.0183755	0.97244	0.506718	0.304976
ENSDARG00000012495	ENSDARG00000012495	mphosph10	blue	0.868349	0.0248571	-0.668065	0.146984	0.996439	1.90033e-05	-0.69599	0.124584	-0.744998	0.0892482	0.296772	0.56791	0.268019	0.607598	0.14461	0.784598
ENSDARG00000012820	ENSDARG00000012820	nop56	blue	0.779274	0.0677033	-0.530107	0.279323	0.977411	0.000759643	-0.695427	0.12502	-0.62876	0.181146	0.197675	0.707349	0.180483	0.732215	0.0546471	0.918111
ENSDARG00000012953	ENSDARG00000012953	mob1bb	blue	0.871358	0.0237587	-0.679446	0.137663	0.98485	0.000342528	-0.779342	0.0676627	-0.609695	0.198778	0.281151	0.589386	0.234209	0.655111	0.0543026	0.918626
ENSDARG00000013050	ENSDARG00000013050	abcc12	blue	0.72187	0.105277	-0.595751	0.212095	0.830676	0.0405784	-0.635637	0.174954	-0.305601	0.555869	-0.0330602	0.950428	0.317184	0.54018	0.261353	0.616897
ENSDARG00000013279	ENSDARG00000013279	znf76	blue	0.772167	0.0719485	-0.610392	0.198122	0.945663	0.00434851	-0.710372	0.113679	-0.604988	0.203234	0.108812	0.837426	0.482134	0.332836	0.206675	0.694402
ENSDARG00000013475	ENSDARG00000013475	cct4	blue	0.889506	0.0176388	-0.775532	0.069924	0.939485	0.00538224	-0.851743	0.0313408	-0.811426	0.0499872	0.515706	0.295017	0.47244	0.344064	-0.0398353	0.940279
ENSDARG00000013721	ENSDARG00000013721	g6pca.2	blue	-0.738509	0.0936265	0.543067	0.26548	-0.892069	0.0168449	0.883503	0.0195667	0.69242	0.127359	-0.476093	0.339818	-0.315375	0.542621	0.306144	0.555131
ENSDARG00000014329	ENSDARG00000014329	npm1a	blue	0.811611	0.0498929	-0.707755	0.115631	0.918313	0.00973668	-0.813186	0.0490894	-0.700268	0.121295	0.306516	0.554624	0.60486	0.203356	0.0804115	0.879643
ENSDARG00000014506	ENSDARG00000014506	tmem126a	blue	0.810387	0.0505211	-0.625421	0.184185	0.973902	0.00101277	-0.739192	0.0931614	-0.616752	0.192173	0.170745	0.746371	0.378088	0.459892	0.142564	0.787602
ENSDARG00000014657	ENSDARG00000014657	zgc:171731	blue	0.776262	0.0694882	-0.5467	0.261649	0.774483	0.070552	-0.576689	0.230861	-0.511227	0.299965	0.502316	0.309899	-0.380087	0.457324	-0.188027	0.721284
ENSDARG00000015546	ENSDARG00000015546	alpl	blue	0.63824	0.172633	-0.385676	0.45017	0.817852	0.0467452	-0.347143	0.500202	-0.398481	0.433915	-0.0821759	0.877014	-0.0863117	0.870854	0.340999	0.508328
ENSDARG00000015676	ENSDARG00000015676	nmd3	blue	0.895068	0.0159385	-0.821045	0.045172	0.900031	0.0144911	-0.857554	0.028991	-0.814401	0.048474	0.565892	0.241771	0.519404	0.290957	-0.0436122	0.934623
ENSDARG00000015853	ENSDARG00000015853	rnps1	blue	0.734257	0.0965459	-0.468805	0.348309	0.883959	0.019417	-0.530401	0.279006	-0.458721	0.360182	0.125258	0.813096	-0.13556	0.797906	0.111196	0.833893
ENSDARG00000015921	ENSDARG00000015921	pwp1	blue	0.829511	0.0411222	-0.676138	0.140346	0.959962	0.00237242	-0.818109	0.0466178	-0.754387	0.0830805	0.360206	0.483059	0.484431	0.330195	0.0119113	0.982134
ENSDARG00000016085	ENSDARG00000016085	mbnl3	blue	0.424293	0.401752	-0.138325	0.793836	0.745949	0.0886147	-0.38662	0.448964	-0.207574	0.693111	-0.294552	0.57095	0.0285402	0.957201	0.197665	0.707363
ENSDARG00000016477	ENSDARG00000016477	eif4a2	blue	0.793131	0.0597657	-0.526438	0.283291	0.942517	0.00486147	-0.690808	0.12862	-0.580814	0.226746	0.301923	0.560876	-0.0489359	0.926655	-0.0691723	0.896407
ENSDARG00000016484	ENSDARG00000016484	dkc1	blue	0.908752	0.0121094	-0.703321	0.118971	0.976775	0.000802833	-0.709773	0.114125	-0.765361	0.0761241	0.451574	0.368681	0.0968071	0.855243	0.0259811	0.961037
ENSDARG00000016706	ENSDARG00000016706	atic	blue	0.810435	0.0504964	-0.733011	0.0974089	0.887483	0.0182779	-0.610178	0.198323	-0.802853	0.054469	0.246957	0.637095	0.631889	0.178318	0.354918	0.489978
ENSDARG00000016858	ENSDARG00000016858	smad7	blue	0.727838	0.101028	-0.448894	0.371887	0.903315	0.0135702	-0.475681	0.340295	-0.665251	0.14933	0.205361	0.696289	-0.0658691	0.901339	0.139664	0.791866
ENSDARG00000017058	ENSDARG00000017058	gyltl1b	blue	0.898494	0.0149322	-0.801682	0.0550953	0.941156	0.00509203	-0.858078	0.0287834	-0.69723	0.123627	0.409355	0.420266	0.495546	0.317526	0.0375465	0.943707
ENSDARG00000017230	ENSDARG00000017230	fbxw11b	blue	0.166358	0.752765	0.114672	0.828746	0.415588	0.412507	0.164603	0.755325	-0.108684	0.837616	-0.392365	0.441655	-0.408836	0.420914	0.405571	0.424999
ENSDARG00000017522	ENSDARG00000017522	ctdp1	blue	0.727582	0.101209	-0.669559	0.145747	0.837417	0.037501	-0.698924	0.122324	-0.617424	0.191549	0.140335	0.790879	0.729464	0.099884	0.257514	0.622268
ENSDARG00000017675	ENSDARG00000017675	cirh1a	blue	0.875391	0.0223238	-0.766619	0.0753441	0.939635	0.00535583	-0.826639	0.0424761	-0.802582	0.0546137	0.454616	0.365055	0.523531	0.286449	0.0259171	0.961133
ENSDARG00000018478	ENSDARG00000018478	agxtb	blue	0.713622	0.111276	-0.45294	0.367051	0.929549	0.00727011	-0.493633	0.319693	-0.614874	0.193922	0.0551964	0.91729	0.113433	0.83058	0.257307	0.622557
ENSDARG00000018846	ENSDARG00000018846	dgat2	blue	0.82884	0.0414365	-0.708797	0.114852	0.908368	0.0122099	-0.600912	0.207125	-0.550267	0.257908	0.0872201	0.869502	0.380595	0.456673	0.382011	0.454858
ENSDARG00000018902	ENSDARG00000018902	pes	blue	0.756851	0.0814943	-0.495001	0.318143	0.96869	0.00145511	-0.702253	0.119782	-0.659482	0.154187	0.237791	0.650036	0.165195	0.754462	-0.011262	0.983108
ENSDARG00000018944	ENSDARG00000018944	hoga1	blue	0.951606	0.00345637	-0.793188	0.0597337	0.938066	0.00563492	-0.831642	0.0401306	-0.669033	0.146181	0.567781	0.239848	0.0728301	0.890948	-0.124329	0.814468
ENSDARG00000018961	ENSDARG00000018961	gtpbp4	blue	0.911948	0.0112885	-0.765279	0.0761753	0.917291	0.00997816	-0.755234	0.0825337	-0.895464	0.0158206	0.653424	0.159358	0.219387	0.676198	-0.0821195	0.877098
ENSDARG00000019293	ENSDARG00000019293	tfdp1a	blue	0.797351	0.0574387	-0.606392	0.2019	0.962886	0.00204064	-0.686244	0.132221	-0.571126	0.236457	0.107767	0.838975	0.328518	0.524951	0.203675	0.698712
ENSDARG00000019300	ENSDARG00000019300	ints7	blue	0.85153	0.0314287	-0.629394	0.180572	0.907787	0.0123627	-0.566289	0.241366	-0.598953	0.209006	0.316503	0.541098	-0.114355	0.829216	0.117371	0.824752
ENSDARG00000019360	ENSDARG00000019360	sec23b	blue	0.773226	0.0713084	-0.587284	0.220352	0.951099	0.00352846	-0.578618	0.228933	-0.666498	0.148289	0.074953	0.887781	0.387581	0.447739	0.335679	0.515394
ENSDARG00000019498	ENSDARG00000019498	cry5	blue	0.232682	0.657276	-0.145133	0.783829	0.423688	0.402497	0.0819939	0.877285	-0.0818478	0.877502	-0.602409	0.205693	0.304106	0.557903	0.809006	0.0512345
ENSDARG00000019529	ENSDARG00000019529	parp1	blue	0.857581	0.0289806	-0.751125	0.085201	0.94402	0.00461286	-0.739052	0.0932564	-0.747595	0.0875221	0.290834	0.576048	0.558863	0.24898	0.210304	0.689195
ENSDARG00000019644	ENSDARG00000019644	ldhba	blue	0.47454	0.341621	-0.244638	0.640363	0.788178	0.0625506	-0.703375	0.11893	-0.317966	0.539124	-0.0653624	0.902096	0.361048	0.481961	-0.0983228	0.852991
ENSDARG00000019791	ENSDARG00000019791	prmt3	blue	0.733517	0.0970576	-0.548611	0.259642	0.935479	0.00611021	-0.748347	0.0870256	-0.741822	0.0913793	0.256865	0.623177	0.495134	0.317992	0.0316859	0.952487
ENSDARG00000020007	ENSDARG00000020007	col1a2	blue	0.917834	0.00984949	-0.751723	0.0848103	0.909881	0.0118162	-0.79168	0.0605756	-0.81178	0.0498061	0.681807	0.135762	0.0775818	0.883861	-0.18652	0.723464
ENSDARG00000020232	ENSDARG00000020232	eif6	blue	0.754275	0.0831528	-0.549089	0.259142	0.961064	0.00224448	-0.697755	0.123223	-0.743577	0.090199	0.216229	0.680712	0.422907	0.403458	0.106584	0.84073
ENSDARG00000020239	ENSDARG00000020239	lpin1	blue	0.915445	0.0104221	-0.850886	0.0316947	0.781241	0.0665491	-0.755745	0.0822044	-0.854354	0.0302743	0.842609	0.0352083	0.15688	0.76661	-0.192957	0.714157
ENSDARG00000021366	ENSDARG00000021366	fbp1a	blue	0.385866	0.449927	-0.281831	0.588447	0.633765	0.176631	-0.354197	0.490922	-0.207615	0.693051	-0.409959	0.419512	0.584165	0.223426	0.490544	0.323205
ENSDARG00000021372	ENSDARG00000021372	tob1b	blue	0.807696	0.0519154	-0.545677	0.262726	0.925289	0.00816403	-0.619859	0.189294	-0.619233	0.189873	0.332623	0.519465	-0.114518	0.828975	-0.0127741	0.98084
ENSDARG00000021389	ENSDARG00000021389	jag2b	blue	0.450066	0.370483	-0.305437	0.556092	0.666748	0.148081	-0.0792148	0.881426	-0.611101	0.197455	-0.236084	0.652453	0.427569	0.397729	0.708462	0.115102
ENSDARG00000021443	ENSDARG00000021443	zfp36l1b	blue	0.471277	0.345421	-0.23079	0.659962	0.706992	0.116203	-0.148606	0.778732	-0.322312	0.533274	-0.309201	0.550979	-0.00532332	0.992015	0.525275	0.284553
ENSDARG00000021702	ENSDARG00000021702	pdcd4a	blue	0.898436	0.014949	-0.726972	0.10164	0.982731	0.000444777	-0.861163	0.0275756	-0.708683	0.114937	0.443445	0.378433	0.295312	0.569909	-0.0726722	0.891184
ENSDARG00000022399	ENSDARG00000022399	ntmt1	blue	0.811239	0.0500831	-0.563892	0.243814	0.902327	0.0138441	-0.643538	0.167951	-0.765538	0.0760144	0.510588	0.300674	-0.0767746	0.885064	-0.121815	0.818182
ENSDARG00000022410	ENSDARG00000022410	rrp12	blue	0.822008	0.0447022	-0.703647	0.118724	0.937716	0.00569817	-0.774656	0.0704486	-0.744159	0.0898091	0.299388	0.564335	0.580412	0.227146	0.128148	0.808831
ENSDARG00000023058	ENSDARG00000023058	foxo3a	blue	0.6375	0.173292	-0.530369	0.279041	0.688743	0.130244	-0.153273	0.771891	-0.429995	0.39476	-0.140388	0.790802	0.150511	0.775938	0.704871	0.117799
ENSDARG00000023217	ENSDARG00000023217	crema	blue	0.764952	0.0763786	-0.622204	0.187133	0.622892	0.186502	-0.430448	0.394206	-0.604669	0.203538	0.681913	0.135677	-0.412943	0.415794	-0.136107	0.7971
ENSDARG00000023583	ENSDARG00000023583	coq9	blue	0.732151	0.0980063	-0.626326	0.18336	0.871629	0.0236611	-0.517272	0.293295	-0.690769	0.128651	0.0441766	0.933778	0.603103	0.20503	0.466161	0.351408
ENSDARG00000023678	ENSDARG00000023678	ercc5	blue	0.843488	0.034827	-0.710502	0.113582	0.954207	0.00309749	-0.830991	0.0404324	-0.716437	0.109212	0.342475	0.506371	0.512539	0.298513	0.0389396	0.94162
ENSDARG00000024416	ENSDARG00000024416	twistnb	blue	0.808653	0.0514174	-0.556496	0.251426	0.976919	0.000792975	-0.731012	0.0988002	-0.651706	0.160838	0.300617	0.562658	0.106653	0.840627	-0.0363896	0.94544
ENSDARG00000024759	ENSDARG00000024759	inhbab	blue	0.604746	0.203464	-0.496861	0.316039	0.730071	0.0994586	-0.234287	0.654999	-0.44105	0.381323	-0.223404	0.670469	0.366167	0.475297	0.69985	0.121615
ENSDARG00000025332	ENSDARG00000025332	rbm28	blue	0.817082	0.0471284	-0.5988	0.209153	0.987217	0.000244073	-0.701759	0.120158	-0.765686	0.0759221	0.292275	0.574071	0.295634	0.569468	0.0853011	0.872359
ENSDARG00000025513	ENSDARG00000025513	dip2cb	blue	0.787269	0.0630683	-0.559612	0.248208	0.976522	0.000820357	-0.695295	0.125123	-0.599333	0.208641	0.150953	0.775291	0.243115	0.642512	0.118313	0.823359
ENSDARG00000025522	ENSDARG00000025522	sgk1	blue	-0.460502	0.358074	0.315668	0.542225	-0.6976	0.123342	0.72611	0.10225	0.153273	0.77189	0.110452	0.834995	-0.453326	0.366591	0.0633299	0.905132
ENSDARG00000025641	ENSDARG00000025641	gli2a	blue	0.728874	0.100299	-0.495311	0.317791	0.817449	0.0469456	-0.593504	0.214274	-0.835134	0.0385308	0.591874	0.21586	-0.0499698	0.925108	-0.199559	0.704635
ENSDARG00000026376	ENSDARG00000026376	aco1	blue	0.828064	0.0418017	-0.639046	0.171917	0.955165	0.00297022	-0.652608	0.16006	-0.882618	0.0198592	0.394312	0.439186	0.331118	0.521475	0.112729	0.831623
ENSDARG00000026489	ENSDARG00000026489	khsrp	blue	0.742274	0.0910745	-0.479148	0.336281	0.965339	0.00178128	-0.647359	0.164607	-0.663191	0.151057	0.181243	0.731112	0.177832	0.736065	0.0694677	0.895966
ENSDARG00000026784	ENSDARG00000026784	robo1	blue	0.339706	0.510042	-0.284754	0.584413	0.407714	0.422316	0.234682	0.65444	-0.41227	0.416631	-0.312806	0.546095	0.215441	0.681839	0.914537	0.0106439
ENSDARG00000027916	ENSDARG00000027916	fntb	blue	0.95017	0.00366274	-0.778522	0.0681469	0.973954	0.00100872	-0.742158	0.0911524	-0.746303	0.0883789	0.478241	0.337329	0.133815	0.800476	0.0443836	0.933468
ENSDARG00000027986	ENSDARG00000027986	slc35d1b	blue	-0.913239	0.0109646	0.833561	0.0392478	-0.859573	0.0281951	0.888494	0.0179571	0.810736	0.0503414	-0.736711	0.0948562	-0.334675	0.516731	0.222181	0.672212
ENSDARG00000028276	ENSDARG00000028276	si:ch211-196h16.12	blue	0.75214	0.0845382	-0.506134	0.305628	0.787856	0.062734	-0.551646	0.256467	-0.452729	0.367303	0.388864	0.446106	-0.375831	0.462796	-0.125124	0.813294
ENSDARG00000028943	ENSDARG00000028943	mtss1la	blue	0.84286	0.0350992	-0.679712	0.137449	0.972099	0.00115683	-0.710053	0.113916	-0.637325	0.173448	0.180367	0.732384	0.390134	0.44449	0.217265	0.67923
ENSDARG00000029105	ENSDARG00000029105	ftr51	blue	0.929488	0.00728253	-0.762782	0.0777339	0.990943	0.000122676	-0.799792	0.0561123	-0.707372	0.115918	0.409311	0.42032	0.253519	0.627869	0.0389274	0.941638
ENSDARG00000029170	ENSDARG00000029170	si:ch211-200p22.4	blue	0.240316	0.646466	0.08157	0.877916	0.641529	0.16972	-0.332193	0.52004	-0.154159	0.770593	-0.338446	0.511715	-0.00920152	0.986198	0.0423288	0.936545
ENSDARG00000029177	ENSDARG00000029177	lnx2a	blue	0.933997	0.00639086	-0.80038	0.0557948	0.836749	0.037801	-0.782725	0.0656842	-0.657212	0.156116	0.713507	0.11136	-0.0852714	0.872403	-0.226289	0.66636
ENSDARG00000029473	ENSDARG00000029473	gstm.2	blue	0.670629	0.144862	-0.420573	0.406337	0.905863	0.0128757	-0.54848	0.259779	-0.44959	0.371053	-0.0548449	0.917815	0.152993	0.772301	0.224967	0.668242
ENSDARG00000029874	ENSDARG00000029874	khk	blue	0.904005	0.0133803	-0.73663	0.0949112	0.995463	3.08343e-05	-0.767516	0.0747902	-0.762709	0.0777798	0.373837	0.465367	0.338738	0.511327	0.0949827	0.857954
ENSDARG00000029936	ENSDARG00000029936	grtp1a	blue	-0.85162	0.0313914	0.7706	0.0729006	-0.820342	0.0455159	0.923987	0.00844745	0.764322	0.0767712	-0.737707	0.094174	-0.356087	0.488445	0.328804	0.524568
ENSDARG00000030267	ENSDARG00000030267	gtf3aa	blue	0.94107	0.00510673	-0.832925	0.0395391	0.890748	0.0172519	-0.817501	0.0469195	-0.857093	0.0291743	0.725274	0.102844	0.236349	0.652078	-0.144058	0.785408
ENSDARG00000030616	ENSDARG00000030616	nfe2l1a	blue	-0.859795	0.0281082	0.767996	0.0744947	-0.859373	0.0282732	0.867812	0.0250556	0.844768	0.0342751	-0.682102	0.135526	-0.419842	0.407239	0.203885	0.69841
ENSDARG00000031560	ENSDARG00000031560	srpk1b	blue	0.744905	0.0893103	-0.549661	0.258542	0.937876	0.00566918	-0.562201	0.245546	-0.599156	0.208811	0.0131811	0.980229	0.353764	0.491491	0.341966	0.507046
ENSDARG00000031616	ENSDARG00000031616	g6pca.1	blue	0.954426	0.00306812	-0.804899	0.0533835	0.949145	0.00381352	-0.80359	0.054077	-0.630344	0.179713	0.471929	0.34466	0.120717	0.819804	-0.0151465	0.977282
ENSDARG00000031737	ENSDARG00000031737	pthlha	blue	0.753743	0.0834972	-0.607312	0.201029	0.92384	0.00847954	-0.670841	0.144687	-0.584009	0.22358	0.0591117	0.911436	0.517373	0.293185	0.273276	0.60029
ENSDARG00000031745	ENSDARG00000031745	si:busm1-266f07.2	blue	0.645515	0.166217	-0.331851	0.520496	0.837388	0.0375142	-0.576853	0.230697	-0.538105	0.270749	0.295594	0.569523	-0.232966	0.656872	-0.190655	0.717482
ENSDARG00000032516	ENSDARG00000032516	rrp36	blue	0.896009	0.0156589	-0.698708	0.12249	0.922606	0.00875303	-0.675769	0.140646	-0.825202	0.0431611	0.579377	0.228177	0.0175145	0.973731	-0.0520196	0.922041
ENSDARG00000032704	ENSDARG00000032704	qrsl1	blue	0.88158	0.0202045	-0.785066	0.0643303	0.919184	0.00953284	-0.738832	0.0934059	-0.55651	0.251412	0.225087	0.668071	0.41013	0.419298	0.226988	0.665366
ENSDARG00000033160	ENSDARG00000033160	nr1d1	blue	0.269792	0.605131	0.0600005	0.910107	0.523149	0.286865	-0.281084	0.589478	-0.459058	0.359783	0.238102	0.649596	-0.37746	0.4607	-0.332582	0.519521
ENSDARG00000033376	ENSDARG00000033376	chchd4a	blue	0.820108	0.0456311	-0.601579	0.206487	0.980365	0.000574515	-0.6447	0.166931	-0.645227	0.166469	0.170526	0.74669	0.219784	0.675632	0.196315	0.70931
ENSDARG00000033579	ENSDARG00000033579	mtrf1	blue	0.894408	0.0161357	-0.699067	0.122214	0.996866	1.47197e-05	-0.779559	0.0675352	-0.754539	0.0829822	0.408329	0.421548	0.243407	0.6421	0.0102829	0.984576
ENSDARG00000034048	ENSDARG00000034048	zgc:92275	blue	0.931763	0.00682559	-0.74271	0.0907815	0.956825	0.0027559	-0.732507	0.0977591	-0.678325	0.13857	0.462617	0.355578	0.0295104	0.955747	0.00150261	0.997746
ENSDARG00000034173	ENSDARG00000034173	prkcq	blue	0.531762	0.27754	-0.253147	0.62839	0.804744	0.0534652	-0.350331	0.496002	-0.352182	0.493568	-0.206702	0.694363	0.00897607	0.986536	0.310411	0.549339
ENSDARG00000034403	ENSDARG00000034403	zgc:173443	blue	0.473518	0.342809	-0.233108	0.656672	0.625143	0.18444	-0.0687769	0.896997	-0.270747	0.603803	-0.197585	0.707479	-0.280725	0.589973	0.454507	0.365184
ENSDARG00000034825	ENSDARG00000034825	uspl1	blue	0.8048	0.0534358	-0.626698	0.183021	0.920893	0.00913934	-0.894101	0.016228	-0.732146	0.0980098	0.516118	0.294564	0.327283	0.526604	-0.25386	0.62739
ENSDARG00000035018	ENSDARG00000035018	thy1	blue	0.576287	0.231264	-0.296105	0.568824	0.775507	0.069939	-0.34562	0.502212	-0.310033	0.549851	-0.0919878	0.862408	-0.207551	0.693144	0.225336	0.667717
ENSDARG00000035147	ENSDARG00000035147	lrwd1	blue	0.705322	0.117458	-0.462511	0.355703	0.941045	0.00511111	-0.630207	0.179837	-0.5237	0.286266	0.02396	0.964067	0.239549	0.647549	0.161918	0.759246
ENSDARG00000035264	ENSDARG00000035264	riok2	blue	0.834357	0.038884	-0.631166	0.17897	0.983121	0.000424948	-0.764128	0.0768921	-0.787664	0.062843	0.375327	0.463446	0.32421	0.530724	0.00163093	0.997554
ENSDARG00000035718	ENSDARG00000035718	cbln6	blue	-0.875121	0.0224183	0.754542	0.0829799	-0.888456	0.0179691	0.868826	0.0246815	0.839766	0.0364554	-0.677543	0.139204	-0.340332	0.509212	0.218328	0.677712
ENSDARG00000035819	ENSDARG00000035819	sirt3	blue	0.849001	0.0324795	-0.713139	0.111631	0.961347	0.00221223	-0.691243	0.128279	-0.713547	0.111331	0.214969	0.682514	0.483736	0.330993	0.264449	0.612573
ENSDARG00000035835	ENSDARG00000035835	eef2k	blue	0.474633	0.341512	-0.336677	0.514065	0.7302	0.0993686	-0.285099	0.583939	-0.615355	0.193473	-0.196901	0.708465	0.618056	0.190963	0.554722	0.253265
ENSDARG00000035872	ENSDARG00000035872	hsd17b12b	blue	0.760451	0.0792026	-0.510617	0.300641	0.900028	0.014492	-0.759164	0.0800184	-0.420394	0.406558	0.262973	0.614633	-0.059091	0.911467	-0.161779	0.759448
ENSDARG00000035909	ENSDARG00000035909	mfsd2ab	blue	0.952833	0.00328465	-0.81153	0.0499343	0.886855	0.0184786	-0.736867	0.094749	-0.787895	0.0627115	0.68909	0.12997	0.0158654	0.976204	-0.104316	0.844094
ENSDARG00000036076	ENSDARG00000036076	heatr3	blue	0.825193	0.0431655	-0.605686	0.202571	0.98922	0.00017368	-0.707399	0.115897	-0.765556	0.0760028	0.306947	0.554039	0.277086	0.595007	0.0733801	0.890127
ENSDARG00000036359	ENSDARG00000036359	riox2	blue	0.784426	0.0646989	-0.676879	0.139743	0.896824	0.0154188	-0.83464	0.0387549	-0.742266	0.0910801	0.378521	0.459335	0.608992	0.199441	-0.0172193	0.974174
ENSDARG00000036414	ENSDARG00000036414	si:ch73-335l21.1	blue	0.765895	0.0757928	-0.626313	0.183372	0.920347	0.00926427	-0.577006	0.230544	-0.675131	0.141167	0.0678874	0.898325	0.52053	0.289725	0.38981	0.444901
ENSDARG00000036426	ENSDARG00000036426	CDA (1 of many)	blue	0.870213	0.024174	-0.667268	0.147647	0.984938	0.000338582	-0.744913	0.0893051	-0.613464	0.195239	0.272141	0.601866	0.184552	0.726315	0.0765598	0.885385
ENSDARG00000036430	ENSDARG00000036430	sat2a	blue	-0.962747	0.00205586	0.807526	0.0520043	-0.933758	0.00643671	0.784132	0.0648688	0.725096	0.102971	-0.595444	0.212393	-0.0566056	0.915182	0.0792121	0.88143
ENSDARG00000036494	ENSDARG00000036494	gstcd	blue	0.920457	0.009239	-0.789317	0.0619054	0.959559	0.00242019	-0.679271	0.137804	-0.870404	0.0241045	0.441519	0.380756	0.370671	0.469458	0.192702	0.714525
ENSDARG00000036650	ENSDARG00000036650	cdadc1	blue	-0.921138	0.00908356	0.822729	0.0443519	-0.898591	0.0149043	0.850508	0.0318513	0.854305	0.0302941	-0.681057	0.136365	-0.355621	0.489055	0.134679	0.799203
ENSDARG00000037309	ENSDARG00000037309	gatb	blue	0.672743	0.143122	-0.4145	0.413858	0.891168	0.0171221	-0.525494	0.284315	-0.418662	0.408699	-0.0421803	0.936767	0.0552048	0.917277	0.209361	0.690547
ENSDARG00000037570	ENSDARG00000037570	polr1d	blue	0.936525	0.00591565	-0.794656	0.0589197	0.89375	0.0163338	-0.761881	0.0783004	-0.841487	0.0356981	0.709777	0.114121	0.0947312	0.858328	-0.135929	0.797362
ENSDARG00000037894	ENSDARG00000037894	ezh1	blue	0.756562	0.0816799	-0.589208	0.218465	0.876298	0.0220068	-0.84431	0.0344723	-0.799683	0.0561713	0.549104	0.259126	0.374831	0.464085	-0.25623	0.624066
ENSDARG00000038248	ENSDARG00000038248	ggact.2	blue	0.771982	0.0720607	-0.596906	0.210979	0.677717	0.139062	-0.604822	0.203392	-0.543416	0.265112	0.705909	0.117017	-0.401216	0.430469	-0.338591	0.511523
ENSDARG00000038315	ENSDARG00000038315	pdxp	blue	0.835526	0.038353	-0.68924	0.129853	0.947283	0.00409531	-0.838397	0.0370629	-0.556807	0.251104	0.25063	0.631926	0.404547	0.426284	0.0334467	0.949849
ENSDARG00000038615	ENSDARG00000038615	tmem55ba	blue	0.88299	0.0197361	-0.664206	0.150205	0.973037	0.0010807	-0.710837	0.113334	-0.782238	0.0659674	0.458211	0.360786	0.0961901	0.85616	-0.0130062	0.980492
ENSDARG00000038910	ENSDARG00000038910	pccb	blue	0.800224	0.0558793	-0.664089	0.150303	0.932598	0.00666153	-0.638792	0.172143	-0.613983	0.194753	0.0887384	0.867242	0.478077	0.337518	0.335724	0.515334
ENSDARG00000039578	ENSDARG00000039578	pa2g4a	blue	0.85619	0.0295349	-0.679336	0.137752	0.989566	0.00016273	-0.784397	0.0647158	-0.723371	0.104201	0.312459	0.546565	0.3879	0.447333	0.0699486	0.895248
ENSDARG00000039887	ENSDARG00000039887	c1qbp	blue	0.807428	0.0520551	-0.705368	0.117424	0.915803	0.0103353	-0.745599	0.0888476	-0.770876	0.0727326	0.30154	0.561399	0.626799	0.182929	0.161708	0.759553
ENSDARG00000039931	ENSDARG00000039931	slc25a33	blue	0.930305	0.00711673	-0.778868	0.0679425	0.848998	0.0324807	-0.652026	0.160561	-0.71337	0.111461	0.639161	0.171816	-0.121794	0.818212	-0.0587165	0.912026
ENSDARG00000040190	ENSDARG00000040190	qdpra	blue	0.784518	0.064646	-0.585198	0.222405	0.959495	0.00242771	-0.585548	0.222061	-0.648127	0.163939	0.0859289	0.871424	0.321296	0.53464	0.308774	0.551558
ENSDARG00000040439	ENSDARG00000040439	rsl24d1	blue	0.853451	0.0306413	-0.636572	0.174119	0.954745	0.00302563	-0.613996	0.194741	-0.603323	0.20482	0.22968	0.661537	0.0513599	0.923028	0.176799	0.737565
ENSDARG00000040566	ENSDARG00000040566	phykpl	blue	0.860948	0.027659	-0.638837	0.172103	0.963951	0.00192588	-0.711192	0.113071	-0.578722	0.22883	0.290518	0.576483	0.0452089	0.932233	0.0388899	0.941695
ENSDARG00000040666	ENSDARG00000040666	nifk	blue	0.851665	0.0313729	-0.665844	0.148834	0.802312	0.0547579	-0.628946	0.180978	-0.722043	0.105153	0.685128	0.133108	-0.217377	0.679071	-0.195149	0.710993
ENSDARG00000040730	ENSDARG00000040730	wdr75	blue	0.783492	0.0652393	-0.526409	0.283322	0.965159	0.00179968	-0.634315	0.176137	-0.746838	0.0880241	0.292996	0.573083	0.126514	0.811241	0.0515503	0.922743
ENSDARG00000040747	ENSDARG00000040747	tm4sf4	blue	0.40854	0.421284	-0.121426	0.818756	0.785101	0.0643101	-0.512847	0.298172	-0.466863	0.350584	-0.106455	0.840921	0.279607	0.591519	0.0175544	0.973671
ENSDARG00000041022	ENSDARG00000041022	pdcd4b	blue	0.961484	0.00219662	-0.822824	0.0443059	0.899578	0.0146204	-0.764918	0.0763994	-0.628085	0.181759	0.560881	0.246902	-0.00202756	0.996959	-0.0564455	0.915422
ENSDARG00000041065	ENSDARG00000041065	hspb1	blue	-0.801328	0.0552848	0.64772	0.164293	-0.931211	0.00693523	0.745501	0.0889129	0.858689	0.0285423	-0.412658	0.416148	-0.489027	0.324935	-0.0300981	0.954866
ENSDARG00000041691	ENSDARG00000041691	bhlhe41	blue	0.738939	0.0933331	-0.570466	0.237125	0.892343	0.0167611	-0.460562	0.358003	-0.561305	0.246466	-0.040556	0.939199	0.323142	0.532159	0.474134	0.342093
ENSDARG00000041828	ENSDARG00000041828	si:dkeyp-28d2.4	blue	0.55832	0.249541	-0.273345	0.600194	0.765365	0.0761216	-0.344256	0.504015	-0.288849	0.578776	-0.103493	0.845314	-0.221068	0.6738	0.206205	0.695076
ENSDARG00000041895	ENSDARG00000041895	cad	blue	0.730445	0.0991972	-0.577731	0.229819	0.922812	0.00870707	-0.683352	0.134524	-0.682323	0.135348	0.124807	0.813762	0.577087	0.230463	0.213047	0.685264
ENSDARG00000042065	ENSDARG00000042065	eef2a.2	blue	0.699681	0.121744	-0.401388	0.430252	0.890165	0.0174329	-0.630144	0.179894	-0.502956	0.309182	0.232683	0.657275	-0.145883	0.782728	-0.114424	0.829114
ENSDARG00000042112	ENSDARG00000042112	dio1	blue	0.802803	0.0544956	-0.582294	0.225277	0.882236	0.0199861	-0.418402	0.40902	-0.680924	0.136472	0.241404	0.644929	-0.0609053	0.908755	0.286598	0.581873
ENSDARG00000042344	ENSDARG00000042344	trmt6	blue	0.769688	0.073457	-0.503414	0.308668	0.89412	0.0162225	-0.514442	0.29641	-0.588965	0.218703	0.247108	0.636882	-0.158093	0.764836	0.0924424	0.861731
ENSDARG00000042658	ENSDARG00000042658	acad8	blue	0.916912	0.0100686	-0.840732	0.0360293	0.933154	0.00655331	-0.7863	0.063622	-0.716598	0.109094	0.377306	0.460898	0.51141	0.299762	0.168208	0.750068
ENSDARG00000042839	ENSDARG00000042839	dph6	blue	0.890404	0.0173587	-0.776055	0.0696114	0.937084	0.00581309	-0.882979	0.0197397	-0.776446	0.0693783	0.523136	0.28688	0.455613	0.363869	-0.0838975	0.874449
ENSDARG00000043237	ENSDARG00000043237	nfil3-2	blue	-0.861131	0.027588	0.719933	0.106672	-0.867943	0.0250071	0.908277	0.0122339	0.755081	0.082632	-0.712664	0.111981	-0.203875	0.698424	0.352161	0.493596
ENSDARG00000043371	ENSDARG00000043371	mdh2	blue	0.754796	0.0828161	-0.520741	0.289493	0.909759	0.0118477	-0.633168	0.177167	-0.412487	0.416362	0.0851171	0.872633	0.029573	0.955653	0.109887	0.835833
ENSDARG00000043960	ENSDARG00000043960	rpf2	blue	0.845661	0.0338924	-0.774925	0.0702869	0.902164	0.0138896	-0.794456	0.0590308	-0.75099	0.0852886	0.369776	0.470617	0.631444	0.178719	0.121812	0.818186
ENSDARG00000043970	ENSDARG00000043970	lrpprc	blue	0.783063	0.0654877	-0.605821	0.202442	0.961509	0.00219386	-0.65974	0.153968	-0.684487	0.133618	0.131718	0.803566	0.450991	0.369378	0.248454	0.634988
ENSDARG00000044405	ENSDARG00000044405	ttc4	blue	0.885866	0.0187964	-0.734523	0.0963616	0.855591	0.0297753	-0.830044	0.0408728	-0.782723	0.0656851	0.758323	0.0805537	0.0581584	0.912861	-0.315711	0.542167
ENSDARG00000044488	ENSDARG00000044488	pak1ip1	blue	0.870483	0.0240758	-0.665111	0.149447	0.995162	3.50462e-05	-0.781153	0.0666001	-0.748776	0.0867427	0.388949	0.445997	0.251789	0.630299	-0.00807549	0.987887
ENSDARG00000045019	ENSDARG00000045019	aamp	blue	0.874689	0.0225704	-0.71051	0.113577	0.98393	0.000385311	-0.829091	0.0413187	-0.73289	0.0974927	0.380738	0.456489	0.391556	0.442682	0.00667132	0.989993
ENSDARG00000045398	ENSDARG00000045398	mtrr	blue	0.833886	0.0390988	-0.709451	0.114364	0.939594	0.00536318	-0.796345	0.0579895	-0.794905	0.0587823	0.383565	0.452868	0.549593	0.258614	0.05709	0.914458
ENSDARG00000045562	ENSDARG00000045562	pus1	blue	0.836078	0.0381034	-0.587386	0.220251	0.928941	0.0073947	-0.669609	0.145705	-0.611513	0.197068	0.381505	0.455505	-0.10956	0.836318	-0.057969	0.913144
ENSDARG00000045737	ENSDARG00000045737	guca1g	blue	-0.692421	0.127358	0.458311	0.360667	-0.719551	0.106949	0.573068	0.234498	0.687691	0.131074	-0.659458	0.154208	0.300613	0.562663	0.348594	0.498289
ENSDARG00000045978	ENSDARG00000045978	chchd6b	blue	0.903368	0.0135553	-0.705376	0.117418	0.955103	0.0029784	-0.823976	0.0437499	-0.732804	0.0975528	0.55957	0.248251	0.0871736	0.869571	-0.172217	0.744228
ENSDARG00000051889	ENSDARG00000051889	dhodh	blue	0.744757	0.089409	-0.474029	0.342215	0.908122	0.0122745	-0.528147	0.28144	-0.53474	0.274344	0.146032	0.782509	-0.0898289	0.865619	0.129269	0.807177
ENSDARG00000052279	ENSDARG00000052279	osgn1	blue	0.695627	0.124866	-0.515815	0.294898	0.866243	0.0256397	-0.830936	0.0404576	-0.341511	0.507648	0.122314	0.817443	0.294453	0.571085	-0.0974264	0.854323
ENSDARG00000052344	ENSDARG00000052344	tbl3	blue	0.829803	0.0409855	-0.634448	0.176018	0.987536	0.000232072	-0.787222	0.0630952	-0.700815	0.120877	0.292729	0.573448	0.359202	0.48437	0.0325312	0.95122
ENSDARG00000052480	ENSDARG00000052480	pdcd11	blue	0.750683	0.0854898	-0.511217	0.299976	0.970363	0.00130455	-0.656717	0.156538	-0.70545	0.117362	0.181041	0.731406	0.290347	0.576718	0.114146	0.829525
ENSDARG00000052700	ENSDARG00000052700	SLC9B2	blue	0.749745	0.0861048	-0.510484	0.300789	0.781941	0.0661402	-0.481293	0.333805	-0.450301	0.370203	0.326276	0.527952	-0.370037	0.470279	-0.00977744	0.985334
ENSDARG00000052789	ENSDARG00000052789	azin1a	blue	0.449317	0.37138	-0.15608	0.767781	0.754984	0.0826945	-0.223989	0.669636	-0.408425	0.421428	-0.244729	0.640235	-0.00162474	0.997563	0.367548	0.473504
ENSDARG00000053500	ENSDARG00000053500	cbsa	blue	0.815272	0.0480348	-0.781213	0.0665649	0.8541	0.0303775	-0.740366	0.0923636	-0.698312	0.122794	0.294795	0.570616	0.699934	0.12155	0.221332	0.673424
ENSDARG00000053518	ENSDARG00000053518	adhfe1	blue	0.836288	0.0380086	-0.717033	0.108777	0.934776	0.00624247	-0.615791	0.193067	-0.802769	0.0545142	0.242018	0.64406	0.525249	0.284581	0.335779	0.515261
ENSDARG00000053912	ENSDARG00000053912	fbl	blue	0.843915	0.0346424	-0.62383	0.185641	0.975269	0.000909851	-0.774586	0.0704905	-0.781324	0.0665002	0.445699	0.37572	0.203304	0.699245	-0.0858898	0.871482
ENSDARG00000054058	ENSDARG00000054058	h1fx	blue	-0.874824	0.0225227	0.758318	0.0805571	-0.887108	0.0183976	0.936882	0.00585008	0.740824	0.0920537	-0.65288	0.159826	-0.334918	0.516407	0.281178	0.589348
ENSDARG00000054154	ENSDARG00000054154	bms1	blue	0.826758	0.0424193	-0.667674	0.14731	0.961392	0.00220708	-0.813025	0.0491714	-0.76407	0.0769285	0.365509	0.476151	0.472617	0.343858	0.00578607	0.991321
ENSDARG00000054259	ENSDARG00000054259	nat10	blue	0.774333	0.0706422	-0.62758	0.182218	0.936177	0.00598016	-0.771919	0.0720988	-0.723415	0.104169	0.258338	0.621114	0.561889	0.245866	0.0852925	0.872372
ENSDARG00000054272	ENSDARG00000054272	caprin1b	blue	0.926836	0.00783354	-0.743908	0.0899772	0.972051	0.00116081	-0.830808	0.0405172	-0.721621	0.105456	0.522342	0.287746	0.142901	0.787107	-0.107117	0.839939
ENSDARG00000054540	ENSDARG00000054540	imp4	blue	0.850024	0.0320524	-0.618692	0.190373	0.954164	0.0031032	-0.629092	0.180846	-0.614632	0.194147	0.273495	0.599987	0.000801916	0.998797	0.109422	0.836523
ENSDARG00000054856	ENSDARG00000054856	METTL12	blue	0.882833	0.0197878	-0.725159	0.102926	0.900686	0.0143053	-0.762101	0.0781618	-0.890149	0.017438	0.672006	0.143728	0.19338	0.713545	-0.14701	0.781074
ENSDARG00000055118	ENSDARG00000055118	mylipb	blue	0.893868	0.0162983	-0.769678	0.0734631	0.900944	0.0142323	-0.928516	0.00748222	-0.745168	0.0891345	0.656701	0.156551	0.295162	0.570114	-0.266993	0.609027
ENSDARG00000055151	ENSDARG00000055151	smyd2a	blue	0.741066	0.0918898	-0.55912	0.248715	0.879692	0.0208404	-0.482583	0.332319	-0.455979	0.363435	-0.0446185	0.933117	0.192146	0.715328	0.405256	0.425394
ENSDARG00000055543	ENSDARG00000055543	appb	blue	-0.717208	0.108649	0.64102	0.17017	-0.834576	0.038784	0.616659	0.19226	0.819936	0.0457155	-0.25461	0.626337	-0.717316	0.108571	-0.262084	0.615876
ENSDARG00000055659	ENSDARG00000055659	gpr161	blue	0.80259	0.0546096	-0.642722	0.168668	0.941365	0.00505628	-0.685288	0.132981	-0.536913	0.27202	0.0899342	0.865462	0.377501	0.460647	0.245391	0.639302
ENSDARG00000055868	ENSDARG00000055868	rsl1d1	blue	0.875983	0.0221167	-0.647416	0.164558	0.969755	0.00135827	-0.719653	0.106875	-0.734573	0.0963277	0.442601	0.37945	0.0473845	0.928976	-0.0415213	0.937754
ENSDARG00000056062	ENSDARG00000056062	adgre14	blue	-0.707194	0.116051	0.645393	0.166324	-0.793306	0.0596683	0.665283	0.149303	0.865766	0.0258187	-0.401173	0.430523	-0.705746	0.117139	-0.109756	0.836026
ENSDARG00000056125	ENSDARG00000056125	myct1a	blue	0.958855	0.00250451	-0.812956	0.0492061	0.91344	0.0109145	-0.688804	0.130196	-0.811497	0.0499509	0.6137	0.195018	0.0587999	0.911902	0.0144464	0.978332
ENSDARG00000056160	ENSDARG00000056160	hspd1	blue	0.825788	0.0428813	-0.614765	0.194023	0.979112	0.000649936	-0.609112	0.199327	-0.71066	0.113465	0.191304	0.716545	0.249757	0.633155	0.242893	0.642825
ENSDARG00000056561	ENSDARG00000056561	asb11	blue	0.926267	0.00795439	-0.786806	0.0633325	0.982091	0.000478238	-0.824958	0.0432778	-0.728473	0.100581	0.417619	0.409989	0.365414	0.476275	0.0476748	0.928542
ENSDARG00000056633	ENSDARG00000056633	fgf13b	blue	0.724056	0.103712	-0.480262	0.334994	0.743819	0.090037	-0.473245	0.343127	-0.619507	0.189619	0.522751	0.2873	-0.387078	0.44838	-0.152778	0.772616
ENSDARG00000056640	ENSDARG00000056640	rpia	blue	0.904504	0.0132438	-0.697735	0.123238	0.976615	0.000813924	-0.708918	0.114761	-0.679944	0.137261	0.378562	0.459283	0.0739475	0.889281	0.0558956	0.916244
ENSDARG00000057105	ENSDARG00000057105	nle1	blue	0.891167	0.0171223	-0.676449	0.140092	0.977026	0.000785664	-0.774589	0.0704884	-0.738073	0.0939239	0.473068	0.343333	0.102123	0.847349	-0.0798635	0.880459
ENSDARG00000057644	ENSDARG00000057644	adam8b	blue	0.65918	0.154443	-0.462411	0.355821	0.904417	0.0132675	-0.63753	0.173265	-0.50707	0.304584	-0.0419478	0.937115	0.44281	0.379198	0.218628	0.677283
ENSDARG00000057648	ENSDARG00000057648	dnttip2	blue	0.807315	0.0521144	-0.61762	0.191367	0.97868	0.000676937	-0.718364	0.107809	-0.748608	0.0868533	0.248931	0.634317	0.417051	0.410693	0.129417	0.806959
ENSDARG00000057929	ENSDARG00000057929	naf1	blue	0.85928	0.0283098	-0.646433	0.165415	0.985402	0.000318111	-0.680898	0.136493	-0.807134	0.0522091	0.370614	0.469532	0.219882	0.675492	0.087902	0.868487
ENSDARG00000057973	ENSDARG00000057973	dph1	blue	0.751436	0.0849976	-0.626735	0.182988	0.912229	0.0112176	-0.691905	0.127761	-0.663508	0.15079	0.129208	0.807266	0.61242	0.196217	0.244629	0.640376
ENSDARG00000058088	ENSDARG00000058088	aifm1	blue	0.779596	0.0675133	-0.674232	0.141901	0.899919	0.0145231	-0.588962	0.218706	-0.772993	0.0714495	0.171839	0.744779	0.609198	0.199247	0.371229	0.468736
ENSDARG00000058292	ENSDARG00000058292	sephs1	blue	0.341194	0.508069	0.00874209	0.986887	0.67469	0.141527	-0.230225	0.660764	-0.386611	0.448977	-0.116124	0.826596	-0.22616	0.666543	0.0646883	0.903103
ENSDARG00000058357	ENSDARG00000058357	ankrd33ba	blue	-0.540582	0.268113	0.451354	0.368943	-0.626966	0.182777	0.345689	0.502121	0.0774574	0.884046	0.280161	0.590753	-0.206018	0.695344	-0.479229	0.336187
ENSDARG00000058419	ENSDARG00000058419	gcn1	blue	0.864504	0.026295	-0.751048	0.0852513	0.946918	0.00415172	-0.780454	0.0670097	-0.799326	0.0563643	0.383699	0.452696	0.542703	0.265865	0.111302	0.833737
ENSDARG00000058445	ENSDARG00000058445	zgc:136472	blue	0.939697	0.00534497	-0.772736	0.0716047	0.950416	0.00362698	-0.635318	0.175239	-0.773549	0.071114	0.445573	0.375872	0.10195	0.847605	0.159522	0.762746
ENSDARG00000058733	ENSDARG00000058733	ihha	blue	0.62781	0.182009	-0.470344	0.346509	0.866266	0.0256311	-0.684477	0.133627	-0.540008	0.268723	0.00570645	0.99144	0.597766	0.210149	0.164366	0.755671
ENSDARG00000058801	ENSDARG00000058801	rev3l	blue	0.821994	0.0447091	-0.598249	0.209684	0.980501	0.000566629	-0.628857	0.181059	-0.777004	0.0690462	0.274163	0.599059	0.231529	0.658912	0.159025	0.763473
ENSDARG00000059075	ENSDARG00000059075	nip7	blue	0.922336	0.00881329	-0.725211	0.102889	0.95758	0.002661	-0.695062	0.125303	-0.75417	0.0832207	0.488193	0.325887	0.0373159	0.944052	0.0180741	0.972892
ENSDARG00000059090	ENSDARG00000059090	sstr2a	blue	0.835828	0.0382165	-0.615245	0.193576	0.984697	0.000349461	-0.643754	0.167761	-0.775522	0.0699296	0.291275	0.575444	0.225659	0.667257	0.147663	0.780115
ENSDARG00000059109	ENSDARG00000059109	si:dkeyp-113d7.1	blue	0.827764	0.041943	-0.593455	0.214321	0.979187	0.000645258	-0.663893	0.150467	-0.631413	0.178747	0.219614	0.675875	0.12716	0.810288	0.119411	0.821735
ENSDARG00000059150	ENSDARG00000059150	tmem107	blue	0.900375	0.0143934	-0.7488	0.0867269	0.892067	0.0168457	-0.870561	0.0240475	-0.771485	0.0723625	0.710842	0.11333	0.131921	0.803267	-0.289792	0.577481
ENSDARG00000059386	ENSDARG00000059386	dtwd1	blue	0.914676	0.0106096	-0.738975	0.0933085	0.983192	0.000421403	-0.847388	0.0331586	-0.733187	0.0972866	0.48368	0.331058	0.243614	0.641808	-0.0804731	0.879551
ENSDARG00000059690	ENSDARG00000059690	slc29a4	blue	-0.911081	0.0115085	0.808572	0.0514594	-0.905695	0.0129207	0.84895	0.0325008	0.857123	0.0291624	-0.654143	0.158741	-0.383969	0.452351	0.120195	0.820576
ENSDARG00000060196	ENSDARG00000060196	lhpp	blue	0.672033	0.143705	-0.663392	0.150888	0.737178	0.0945355	-0.625199	0.184389	-0.771439	0.07239	0.289356	0.57808	0.823609	0.0439268	0.230387	0.660533
ENSDARG00000060308	ENSDARG00000060308	urb1	blue	0.865059	0.0260849	-0.672205	0.143564	0.995914	2.50111e-05	-0.708403	0.115146	-0.757505	0.0810761	0.300288	0.563107	0.313053	0.545761	0.14234	0.787931
ENSDARG00000060554	ENSDARG00000060554	mut	blue	0.61934	0.189774	-0.520936	0.28928	0.796117	0.0581147	-0.414947	0.413303	-0.690159	0.12913	-0.0382834	0.942603	0.67396	0.142124	0.519569	0.290776
ENSDARG00000060622	ENSDARG00000060622	si:ch73-14h1.2	blue	-0.824822	0.0433429	0.642651	0.168731	-0.898332	0.0149791	0.67411	0.142001	0.921525	0.0089959	-0.577829	0.229721	-0.217444	0.678975	0.0605243	0.909324
ENSDARG00000060697	ENSDARG00000060697	kmt2bb	blue	-0.891566	0.0169995	0.73013	0.0994175	-0.834836	0.0386661	0.816467	0.0474357	0.63605	0.174585	-0.711925	0.112527	0.109482	0.836434	0.328311	0.525227
ENSDARG00000061201	ENSDARG00000061201	acsf2	blue	0.888258	0.0180318	-0.68723	0.131439	0.942681	0.004834	-0.581805	0.225762	-0.6852	0.13305	0.327384	0.526468	0.020089	0.96987	0.189891	0.718588
ENSDARG00000061354	ENSDARG00000061354	foxred2	blue	0.833568	0.0392443	-0.723995	0.103755	0.689105	0.129959	-0.648824	0.163332	-0.749539	0.0862401	0.860585	0.0278001	-0.160441	0.761403	-0.304416	0.557481
ENSDARG00000061714	ENSDARG00000061714	si:dkey-45k15.1	blue	0.74155	0.0915626	-0.653149	0.159594	0.869458	0.0244496	-0.678855	0.138141	-0.560837	0.246947	0.0692106	0.89635	0.635367	0.175196	0.2981	0.566095
ENSDARG00000061763	ENSDARG00000061763	spata5l1	blue	0.870666	0.0240094	-0.710921	0.113271	0.974207	0.00098932	-0.644482	0.167122	-0.808283	0.0516097	0.293691	0.572129	0.385876	0.449915	0.256954	0.623052
ENSDARG00000062042	ENSDARG00000062042	mthfsd	blue	0.952061	0.0033921	-0.800729	0.0556071	0.980715	0.000554273	-0.789649	0.0617177	-0.708174	0.115317	0.437443	0.385689	0.233782	0.655716	0.0572255	0.914255
ENSDARG00000062839	ENSDARG00000062839	prkg2l	blue	0.575215	0.232339	-0.31213	0.54701	0.822033	0.0446902	-0.415296	0.412869	-0.324257	0.530662	-0.176829	0.737521	0.0227792	0.965837	0.280978	0.589624
ENSDARG00000062915	ENSDARG00000062915	polr3b	blue	0.787878	0.0627213	-0.619928	0.18923	0.955639	0.00290826	-0.750164	0.0858297	-0.760918	0.0789075	0.277383	0.594596	0.501291	0.311048	0.0886744	0.867337
ENSDARG00000063076	ENSDARG00000063076	atrip	blue	0.78861	0.0623055	-0.718922	0.107404	0.590296	0.217401	-0.647135	0.164803	-0.678136	0.138723	0.921664	0.00896454	-0.188836	0.720113	-0.39338	0.440367
ENSDARG00000063596	ENSDARG00000063596	bud23	blue	0.825888	0.0428332	-0.69308	0.126844	0.935879	0.00603537	-0.866501	0.0255435	-0.726762	0.101789	0.401394	0.430245	0.511678	0.299465	-0.056193	0.915799
ENSDARG00000063626	ENSDARG00000063626	ddx21	blue	0.932419	0.0066964	-0.770693	0.072844	0.985702	0.000305189	-0.705213	0.117541	-0.790512	0.0612313	0.404192	0.426729	0.263404	0.614032	0.155301	0.768921
ENSDARG00000067838	ENSDARG00000067838	riox1	blue	0.809148	0.051161	-0.675855	0.140576	0.943541	0.0046914	-0.663953	0.150417	-0.741709	0.0914553	0.192596	0.714678	0.545024	0.263414	0.282348	0.587733
ENSDARG00000067918	ENSDARG00000067918	elp5	blue	0.817326	0.0470066	-0.714255	0.11081	0.812973	0.0491977	-0.879765	0.0208154	-0.813421	0.0489702	0.742567	0.0908775	0.33043	0.522394	-0.337281	0.513262
ENSDARG00000067976	ENSDARG00000067976	ar	blue	0.977322	0.00076559	-0.859311	0.0282978	0.95733	0.00269224	-0.744189	0.0897886	-0.749142	0.0865011	0.474665	0.341476	0.25415	0.626984	0.130836	0.804866
ENSDARG00000068096	ENSDARG00000068096	atf5a	blue	-0.875253	0.0223721	0.779026	0.0678495	-0.932891	0.00660426	0.802903	0.0544422	0.803592	0.0540759	-0.430382	0.394287	-0.555394	0.252568	-0.0802383	0.879901
ENSDARG00000068257	ENSDARG00000068257	kcne4	blue	0.487682	0.32647	-0.195717	0.710173	0.812575	0.0494002	-0.45887	0.360005	-0.328778	0.524603	-0.200153	0.70378	0.0923535	0.861864	0.159589	0.762649
ENSDARG00000068431	ENSDARG00000068431	si:ch211-195h23.3	blue	0.908184	0.0122583	-0.715689	0.109759	0.982517	0.000455812	-0.814639	0.0483537	-0.755513	0.082354	0.494627	0.318566	0.185741	0.724592	-0.082236	0.876924
ENSDARG00000068745	ENSDARG00000068745	map4l	blue	0.951796	0.00342945	-0.86721	0.0252792	0.895194	0.0159007	-0.890312	0.0173873	-0.778652	0.06807	0.688668	0.130303	0.313424	0.545258	-0.158673	0.763988
ENSDARG00000068966	ENSDARG00000068966	si:ch211-261n11.7	blue	-0.915706	0.0103588	0.779584	0.0675207	-0.887031	0.0184221	0.728072	0.100863	0.899134	0.0147479	-0.700843	0.120856	-0.163947	0.756283	0.0922933	0.861953
ENSDARG00000069018	ENSDARG00000069018	cyp7a1	blue	0.742087	0.0912008	-0.718321	0.10784	0.804775	0.0534492	-0.748259	0.0870831	-0.656798	0.156469	0.263466	0.613945	0.768071	0.0744488	0.16941	0.748316
ENSDARG00000069100	ENSDARG00000069100	aldh9a1a.1	blue	0.77057	0.0729186	-0.547566	0.260739	0.966704	0.00164447	-0.722742	0.104652	-0.559341	0.248487	0.133544	0.800875	0.267567	0.608227	0.0875182	0.869058
ENSDARG00000069116	ENSDARG00000069116	timm10	blue	0.818485	0.0464311	-0.604083	0.204095	0.971525	0.00120465	-0.581057	0.226505	-0.771365	0.0724352	0.230133	0.660895	0.245092	0.639723	0.240445	0.646282
ENSDARG00000069280	ENSDARG00000069280	tsen15	blue	0.851025	0.031637	-0.625266	0.184327	0.925633	0.00809	-0.6147	0.194084	-0.813315	0.0490241	0.487523	0.326653	-0.00118901	0.998216	0.00275252	0.995871
ENSDARG00000069293	ENSDARG00000069293	ahsg2	blue	0.791684	0.0605735	-0.55221	0.255879	0.936397	0.00593928	-0.546226	0.262148	-0.573669	0.233893	0.137288	0.795361	0.0300138	0.954993	0.219564	0.675946
ENSDARG00000069313	ENSDARG00000069313	oxa1l	blue	0.896145	0.0156188	-0.757901	0.0808231	0.954523	0.00305522	-0.880976	0.020407	-0.774373	0.0706182	0.525171	0.284666	0.387227	0.448191	-0.10531	0.842619
ENSDARG00000069780	ENSDARG00000069780	pus7l	blue	0.832849	0.039574	-0.612404	0.196231	0.837622	0.0374091	-0.609207	0.199238	-0.54544	0.262976	0.464414	0.353462	-0.277427	0.594535	-0.0961246	0.856257
ENSDARG00000069832	ENSDARG00000069832	sfxn4	blue	0.720989	0.10591	-0.523605	0.286369	0.926766	0.00784847	-0.513064	0.297932	-0.648702	0.163438	0.00536095	0.991959	0.378083	0.459899	0.380729	0.456501
ENSDARG00000069878	ENSDARG00000069878	snu13a	blue	0.743179	0.0904657	-0.548549	0.259707	0.946576	0.00420488	-0.767253	0.0749525	-0.560238	0.247563	0.131405	0.804027	0.407478	0.422611	0.0620013	0.907117
ENSDARG00000069977	ENSDARG00000069977	myg1	blue	0.763885	0.0770438	-0.655672	0.15743	0.898287	0.014992	-0.779418	0.0676183	-0.721595	0.105475	0.278684	0.592795	0.645444	0.166279	0.0904503	0.864695
ENSDARG00000070261	ENSDARG00000070261	crlf3	blue	0.791533	0.0606578	-0.52284	0.287202	0.954263	0.00309003	-0.678619	0.138331	-0.668841	0.146341	0.331475	0.520998	0.00650149	0.990248	-0.0554916	0.916848
ENSDARG00000070394	ENSDARG00000070394	uroc1	blue	0.741795	0.0913976	-0.721259	0.105716	0.797991	0.0570899	-0.570346	0.237246	-0.716117	0.109445	0.169674	0.747932	0.752624	0.084223	0.41691	0.410867
ENSDARG00000070581	ENSDARG00000070581	ggact.1	blue	0.780048	0.0672478	-0.559847	0.247966	0.760047	0.0794582	-0.585668	0.221942	-0.520614	0.289633	0.545402	0.263016	-0.386514	0.4491	-0.218796	0.677043
ENSDARG00000070995	ENSDARG00000070995	inpp4ab	blue	0.846099	0.0337055	-0.610348	0.198163	0.97206	0.00116005	-0.714041	0.110967	-0.607184	0.20115	0.294499	0.571022	0.0552952	0.917142	0.0162611	0.975611
ENSDARG00000071450	ENSDARG00000071450	tdrd5	blue	0.330086	0.522854	-0.0256777	0.961492	0.640701	0.170452	-0.0810951	0.878624	-0.29988	0.563664	-0.322245	0.533363	-0.151083	0.775099	0.373583	0.465695
ENSDARG00000071652	ENSDARG00000071652	rrp8	blue	0.855376	0.0298615	-0.624636	0.184903	0.906816	0.0126202	-0.694761	0.125536	-0.717768	0.108242	0.546058	0.262324	-0.106101	0.841445	-0.153415	0.771682
ENSDARG00000074120	ENSDARG00000074120	usp2b	blue	0.640516	0.170615	-0.615323	0.193503	0.744584	0.0895248	-0.543917	0.264583	-0.490253	0.323536	-0.0462226	0.930716	0.748888	0.0866685	0.448168	0.372756
ENSDARG00000074169	ENSDARG00000074169	gpam	blue	0.893121	0.0165242	-0.682607	0.13512	0.952159	0.00337844	-0.632686	0.177601	-0.777088	0.0689962	0.444071	0.377678	0.031653	0.952536	0.0733016	0.890245
ENSDARG00000074345	ENSDARG00000074345	si:ch211-214b16.4	blue	0.802153	0.0548429	-0.690975	0.12849	0.924441	0.00834798	-0.757702	0.0809503	-0.659612	0.154077	0.207801	0.692785	0.5923	0.215445	0.182219	0.729697
ENSDARG00000074588	ENSDARG00000074588	METTL18	blue	0.89008	0.0174595	-0.690235	0.12907	0.922619	0.00875014	-0.823606	0.043928	-0.70585	0.117061	0.606121	0.202158	0.00756869	0.988647	-0.243356	0.642172
ENSDARG00000074697	ENSDARG00000074697	npdc1a	blue	-0.772363	0.0718297	0.587809	0.219836	-0.923449	0.00856587	0.850422	0.0318872	0.755104	0.0826175	-0.449305	0.371394	-0.38646	0.449169	0.185682	0.724678
ENSDARG00000074807	ENSDARG00000074807	tbrg4	blue	0.836783	0.0377856	-0.741341	0.0917043	0.916619	0.0101387	-0.767332	0.0749037	-0.813775	0.0487907	0.38785	0.447396	0.602976	0.205151	0.115496	0.827526
ENSDARG00000075158	ENSDARG00000075158	igdcc3	blue	0.779401	0.0676282	-0.574228	0.23333	0.730331	0.0992768	-0.543264	0.265272	-0.540644	0.268048	0.576241	0.23131	-0.407231	0.422921	-0.194384	0.712096
ENSDARG00000075299	ENSDARG00000075299	aaed1	blue	0.939835	0.00532084	-0.832751	0.0396192	0.960554	0.00230327	-0.831405	0.0402402	-0.764451	0.0766907	0.47341	0.342935	0.422746	0.403656	0.0515688	0.922715
ENSDARG00000075334	ENSDARG00000075334	arhgap32a	blue	-0.0800578	0.88017	0.259098	0.62005	0.299286	0.564475	-0.360801	0.482283	-0.218976	0.676785	-0.121655	0.818418	0.421833	0.404782	-0.316055	0.541703
ENSDARG00000075757	ENSDARG00000075757	gig2e	blue	-0.879706	0.0208355	0.774294	0.0706657	-0.881104	0.0203639	0.849931	0.0320913	0.863346	0.0267357	-0.680058	0.137169	-0.378151	0.459811	0.176614	0.737833
ENSDARG00000075826	ENSDARG00000075826	msh4	blue	0.852382	0.0310783	-0.775304	0.0700599	0.913824	0.0108194	-0.790477	0.0612507	-0.718361	0.107811	0.331369	0.521139	0.610573	0.197951	0.147864	0.779821
ENSDARG00000075930	ENSDARG00000075930	adamts2	blue	0.787744	0.0627976	-0.544172	0.264313	0.886536	0.0185808	-0.604417	0.203777	-0.452184	0.367954	0.224039	0.669565	-0.153766	0.771169	0.0336899	0.949484
ENSDARG00000076004	ENSDARG00000076004	ppp2r3b	blue	0.469633	0.34734	-0.25135	0.630914	0.690765	0.128654	-0.0819196	0.877396	-0.405951	0.424523	-0.298757	0.565197	0.0635938	0.904738	0.620657	0.188557
ENSDARG00000076142	ENSDARG00000076142	trib1	blue	0.905959	0.0128497	-0.825124	0.0431986	0.918443	0.00970609	-0.886102	0.0187204	-0.741286	0.0917413	0.512696	0.298339	0.498665	0.314003	-0.0402425	0.939669
ENSDARG00000076155	ENSDARG00000076155	mtpap	blue	0.85101	0.0316435	-0.615758	0.193098	0.971477	0.00120873	-0.720941	0.105945	-0.613218	0.195469	0.313832	0.544707	0.0467058	0.929992	0.000290194	0.999565
ENSDARG00000076330	ENSDARG00000076330	dusp12	blue	0.813808	0.0487738	-0.560498	0.247295	0.923031	0.00865827	-0.57926	0.228293	-0.614267	0.194488	0.294073	0.571606	-0.106238	0.841243	0.0669602	0.89971
ENSDARG00000076442	ENSDARG00000076442	zgc:174310	blue	0.86236	0.0271134	-0.677158	0.139516	0.886815	0.0184913	-0.827075	0.0422689	-0.455508	0.363994	0.433661	0.390286	-0.0436326	0.934593	-0.195182	0.710945
ENSDARG00000076518	ENSDARG00000076518	mettl1	blue	0.830775	0.0405327	-0.63263	0.17765	0.935988	0.00601524	-0.616951	0.191988	-0.51513	0.295652	0.141762	0.788782	0.106727	0.840517	0.22106	0.673811
ENSDARG00000076699	ENSDARG00000076699	ipmka	blue	0.83366	0.0392022	-0.665842	0.148836	0.963488	0.00197531	-0.786132	0.0637184	-0.814596	0.0483756	0.403863	0.427142	0.435057	0.388587	0.00654065	0.990189
ENSDARG00000076779	ENSDARG00000076779	fam13b	blue	0.474867	0.34124	-0.385688	0.450155	0.516591	0.294044	-0.429567	0.395283	0.143279	0.786552	-0.196417	0.709163	-0.0128001	0.980801	0.180983	0.731489
ENSDARG00000076895	ENSDARG00000076895	flrt3	blue	0.689266	0.129832	-0.594222	0.213577	0.825838	0.0428571	-0.865816	0.0257998	-0.489806	0.324046	0.217009	0.679596	0.614601	0.194176	-0.067395	0.899061
ENSDARG00000077093	ENSDARG00000077093	scaf4a	blue	0.828075	0.0417963	-0.677889	0.138923	0.911776	0.011332	-0.603279	0.204862	-0.495903	0.317121	0.0892625	0.866462	0.243815	0.641525	0.322382	0.533179
ENSDARG00000077264	ENSDARG00000077264	wdr43	blue	0.832365	0.0397968	-0.708271	0.115245	0.943292	0.00473247	-0.790893	0.0610171	-0.770077	0.0732193	0.346128	0.501541	0.557029	0.250874	0.0858017	0.871613
ENSDARG00000077299	ENSDARG00000077299	yars2	blue	0.966538	0.00166082	-0.842451	0.0352773	0.891017	0.0171687	-0.641251	0.169966	-0.797432	0.0573945	0.594778	0.213038	0.0572166	0.914269	0.0917199	0.862806
ENSDARG00000077329	ENSDARG00000077329	nlgn2a	blue	0.834836	0.0386657	-0.795702	0.0583431	0.859821	0.0280978	-0.819217	0.0460693	-0.72638	0.10206	0.410389	0.418975	0.668075	0.146977	0.0774163	0.884108
ENSDARG00000077469	ENSDARG00000077469	polr1b	blue	0.959117	0.00247298	-0.831685	0.0401107	0.952509	0.00332955	-0.807122	0.0522154	-0.834793	0.0386857	0.597514	0.210392	0.280658	0.590067	-0.0250841	0.962382
ENSDARG00000077580	ENSDARG00000077580	tspeara	blue	-0.729388	0.099938	0.529084	0.280428	-0.874381	0.0226789	0.918006	0.009809	0.601764	0.20631	-0.474417	0.341764	-0.24157	0.644694	0.381688	0.455271
ENSDARG00000077721	ENSDARG00000077721	knop1	blue	0.777381	0.0688222	-0.522442	0.287636	0.851648	0.0313802	-0.717981	0.108087	-0.569313	0.238293	0.511783	0.299349	-0.225486	0.667504	-0.300239	0.563174
ENSDARG00000077875	ENSDARG00000077875	slc2a5	blue	0.927678	0.00765652	-0.783994	0.0649488	0.940857	0.00514335	-0.862246	0.0271572	-0.572557	0.235013	0.44475	0.376861	0.179105	0.734215	-0.0747862	0.88803
ENSDARG00000077906	ENSDARG00000077906	rnf165a	blue	0.576262	0.231289	-0.354787	0.490149	0.862567	0.0270338	-0.723705	0.103963	-0.447666	0.373358	0.00656373	0.990155	0.41078	0.418488	-0.0214944	0.967763
ENSDARG00000078001	ENSDARG00000078001	kbtbd7	blue	0.835217	0.0384932	-0.69333	0.126649	0.960372	0.00232444	-0.743631	0.0901625	-0.651066	0.16139	0.201225	0.702236	0.477303	0.338414	0.194017	0.712626
ENSDARG00000078214	ENSDARG00000078214	mybbp1a	blue	0.846528	0.0335229	-0.71985	0.106733	0.954076	0.00311516	-0.804986	0.0533374	-0.720199	0.10648	0.317119	0.540267	0.529238	0.280261	0.0935411	0.860098
ENSDARG00000078442	ENSDARG00000078442	NOP9	blue	0.800796	0.0555712	-0.626965	0.182778	0.96733	0.00158356	-0.666753	0.148076	-0.710647	0.113475	0.165646	0.753804	0.448804	0.371994	0.242126	0.643908
ENSDARG00000078800	ENSDARG00000078800	slc26a10	blue	0.881664	0.0201765	-0.826814	0.0423927	0.717882	0.108159	-0.814928	0.048208	-0.736245	0.0951759	0.896133	0.0156223	0.0684687	0.897457	-0.359648	0.483788
ENSDARG00000078815	ENSDARG00000078815	grk5l	blue	0.805409	0.0531142	-0.738136	0.0938809	0.8857	0.01885	-0.709216	0.114539	-0.713521	0.11135	0.239315	0.64788	0.671512	0.144134	0.259259	0.619824
ENSDARG00000079105	ENSDARG00000079105	mhc2dab	blue	0.871616	0.0236658	-0.737335	0.094428	0.756345	0.0818192	-0.740233	0.0924536	-0.665676	0.148975	0.7985	0.0568127	-0.175714	0.739142	-0.335254	0.515959
ENSDARG00000079190	ENSDARG00000079190	sycp2l	blue	0.434753	0.388957	-0.196134	0.709572	0.5949	0.21292	-0.0237194	0.964428	-0.24835	0.635133	-0.239362	0.647814	-0.280936	0.589682	0.482834	0.33203
ENSDARG00000079308	ENSDARG00000079308	tor3a	blue	-0.915667	0.0103681	0.783948	0.0649755	-0.865695	0.0258454	0.831432	0.0402276	0.803481	0.0541348	-0.762238	0.0780758	-0.107265	0.839719	0.262238	0.61566
ENSDARG00000079415	ENSDARG00000079415	dnajc30b	blue	0.72756	0.101225	-0.530427	0.278978	0.947477	0.00406548	-0.710756	0.113394	-0.618764	0.190307	0.106455	0.84092	0.446794	0.374404	0.134085	0.800078
ENSDARG00000079416	ENSDARG00000079416	zgc:174895	blue	0.797914	0.0571314	-0.678919	0.138089	0.920571	0.00921293	-0.635267	0.175285	-0.631908	0.178301	0.0977757	0.853804	0.528457	0.281104	0.353144	0.492304
ENSDARG00000079497	ENSDARG00000079497	zgc:110340	blue	-0.827648	0.0419978	0.702838	0.119337	-0.857133	0.0291586	0.909136	0.0120094	0.779389	0.0676351	-0.678423	0.138491	-0.333967	0.517674	0.323756	0.531334
ENSDARG00000079591	ENSDARG00000079591	SSH3	blue	0.465809	0.351822	-0.155645	0.768418	0.745244	0.0890842	-0.259487	0.619506	-0.338631	0.511469	-0.187248	0.722411	-0.161164	0.760348	0.254258	0.626832
ENSDARG00000079605	ENSDARG00000079605	prmt5	blue	0.80807	0.0517206	-0.604289	0.203899	0.975405	0.000899953	-0.61531	0.193515	-0.764878	0.0764243	0.208352	0.691995	0.332193	0.520039	0.235599	0.653141
ENSDARG00000079773	ENSDARG00000079773	nox5	blue	-0.856937	0.0292364	0.759553	0.0797714	-0.915578	0.0103898	0.844747	0.0342841	0.800519	0.0557201	-0.482569	0.332335	-0.550257	0.257918	0.0206933	0.968964
ENSDARG00000079815	ENSDARG00000079815	lyrm7	blue	0.740497	0.0922751	-0.53871	0.270104	0.949989	0.00368906	-0.637789	0.173035	-0.594629	0.213182	0.0468762	0.929737	0.382514	0.454213	0.241706	0.644502
ENSDARG00000080010	ENSDARG00000080010	adh5	blue	0.814494	0.048427	-0.581279	0.226284	0.957613	0.00265687	-0.546245	0.262128	-0.709571	0.114275	0.214986	0.682489	0.106479	0.840886	0.230124	0.660907
ENSDARG00000081440	ENSDARG00000081440	SNORA75	blue	0.794332	0.0590994	-0.617168	0.191786	0.955408	0.00293838	-0.63399	0.176429	-0.610121	0.198376	0.0844292	0.873657	0.378082	0.459899	0.292315	0.574016
ENSDARG00000081946	ENSDARG00000081946	SNORD12	blue	0.841045	0.035892	-0.647413	0.16456	0.899561	0.0146253	-0.891241	0.0170995	-0.685713	0.132642	0.619496	0.18963	0.0922186	0.862064	-0.353884	0.491333
ENSDARG00000086107	ENSDARG00000086107	MTERF1	blue	0.873424	0.0230182	-0.690342	0.128986	0.932603	0.0066605	-0.579172	0.22838	-0.591067	0.216647	0.220845	0.674119	0.0754885	0.886982	0.260432	0.618184
ENSDARG00000086247	ENSDARG00000086247	zgc:171781	blue	0.475167	0.340892	-0.227221	0.665034	0.635553	0.17503	-0.0770223	0.884695	-0.287578	0.580524	-0.188677	0.720343	-0.280496	0.590291	0.440588	0.381881
ENSDARG00000086739	ENSDARG00000086739	si:ch1073-513e17.1	blue	0.919403	0.00948203	-0.722487	0.104834	0.974978	0.000931328	-0.764347	0.0767554	-0.674158	0.141961	0.432422	0.391797	0.0828203	0.876054	-0.0140256	0.978963
ENSDARG00000086842	ENSDARG00000086842	dap1b	blue	0.931454	0.00688686	-0.811217	0.0500944	0.869373	0.0244805	-0.861395	0.0274857	-0.770039	0.0732429	0.756464	0.0817428	0.123912	0.815083	-0.26498	0.611833
ENSDARG00000086848	ENSDARG00000086848	atad3	blue	0.6875	0.131226	-0.628247	0.181612	0.80941	0.0510252	-0.526712	0.282994	-0.642891	0.168519	0.0247387	0.9629	0.720187	0.106489	0.4649	0.35289
ENSDARG00000087369	ENSDARG00000087369	cep162	blue	0.8475	0.0331112	-0.636525	0.174161	0.932975	0.00658798	-0.624608	0.184929	-0.531185	0.278161	0.219036	0.6767	0.00680901	0.989787	0.149535	0.777369
ENSDARG00000087779	ENSDARG00000087779	pum3	blue	0.857634	0.0289593	-0.656953	0.156336	0.956812	0.00275756	-0.798455	0.0568372	-0.816139	0.0475997	0.53072	0.278663	0.214995	0.682477	-0.137144	0.795574
ENSDARG00000087962	ENSDARG00000087962	rpap3	blue	0.700543	0.121085	-0.570167	0.237428	0.875957	0.0221256	-0.746758	0.088077	-0.745961	0.0886063	0.266949	0.609088	0.640826	0.170341	0.0513712	0.923011
ENSDARG00000088619	ENSDARG00000088619	rexo4	blue	0.845373	0.0340156	-0.622341	0.187007	0.97894	0.000660586	-0.615484	0.193353	-0.755468	0.0823826	0.286025	0.582662	0.163587	0.756808	0.171131	0.74581
ENSDARG00000088959	ENSDARG00000088959	pdxka	blue	0.735106	0.0959599	-0.46972	0.347239	0.816147	0.0475954	-0.55776	0.250119	-0.449964	0.370605	0.323656	0.531469	-0.335342	0.515842	-0.104265	0.844169
ENSDARG00000089878	ENSDARG00000089878	nedd9	blue	0.804915	0.0533748	-0.560157	0.247647	0.871369	0.0237546	-0.682571	0.135149	-0.49274	0.320707	0.393853	0.439767	-0.220405	0.674746	-0.155306	0.768915
ENSDARG00000089933	ENSDARG00000089933	rasal3	blue	-0.897246	0.0152951	0.86529	0.0259981	-0.727661	0.101153	0.794487	0.0590136	0.79754	0.0573355	-0.885776	0.0188257	-0.175107	0.740025	0.269537	0.605485
ENSDARG00000090228	ENSDARG00000090228	gsta.1	blue	0.844672	0.0343164	-0.670348	0.145094	0.982649	0.000448987	-0.8035	0.0541249	-0.674534	0.141654	0.285218	0.583774	0.394713	0.438679	0.0536648	0.91958
ENSDARG00000090386	ENSDARG00000090386	cd3eap	blue	0.721255	0.105719	-0.45626	0.3631	0.947415	0.00407503	-0.708014	0.115437	-0.699259	0.122068	0.279416	0.591783	0.189798	0.718722	-0.0764733	0.885514
ENSDARG00000090821	ENSDARG00000090821	tp53rk	blue	0.841711	0.0356002	-0.597	0.210888	0.925632	0.00809019	-0.724598	0.103325	-0.647222	0.164726	0.468127	0.349103	-0.0955577	0.8571	-0.156985	0.766457
ENSDARG00000090930	ENSDARG00000090930	si:ch211-120g10.1	blue	0.965602	0.00175451	-0.881472	0.0202407	0.896481	0.0155197	-0.87597	0.022121	-0.775304	0.0700602	0.691672	0.127944	0.281855	0.588413	-0.138989	0.79286
ENSDARG00000091398	ENSDARG00000091398	CABZ01065684.1	blue	0.356236	0.48825	-0.228253	0.663566	0.660537	0.153293	-0.419386	0.407803	-0.529348	0.280142	-0.17321	0.742783	0.742753	0.0907521	0.295873	0.569142
ENSDARG00000091431	ENSDARG00000091431	CR352285.1	blue	0.615946	0.192923	-0.359033	0.484591	0.829938	0.0409223	-0.497379	0.315454	-0.285602	0.583245	-0.103515	0.845281	-0.0259146	0.961137	0.179845	0.73314
ENSDARG00000091831	ENSDARG00000091831	ddx27	blue	0.875055	0.0224417	-0.652927	0.159785	0.989172	0.000175239	-0.751044	0.0852539	-0.722331	0.104946	0.395127	0.438154	0.136308	0.796804	-0.0171371	0.974297
ENSDARG00000091931	ENSDARG00000091931	gpatch4	blue	0.776086	0.0695932	-0.652686	0.159993	0.922707	0.00873046	-0.67805	0.138792	-0.709938	0.114002	0.163891	0.756364	0.600658	0.207368	0.265545	0.611045
ENSDARG00000091972	ENSDARG00000091972	si:dkey-58f10.7	blue	0.672903	0.14299	-0.395018	0.438293	0.845311	0.0340424	-0.521256	0.28893	-0.364582	0.477357	0.0683872	0.897579	-0.183922	0.727227	0.0611457	0.908396
ENSDARG00000092033	ENSDARG00000092033	si:dkey-239h2.3	blue	0.856767	0.0293041	-0.628564	0.181325	0.983796	0.000391721	-0.708948	0.114739	-0.645194	0.166498	0.292966	0.573123	0.107774	0.838965	0.055799	0.916388
ENSDARG00000092381	ENSDARG00000092381	si:dkey-23c22.9	blue	-0.955444	0.00293366	0.838983	0.0368024	-0.896903	0.0153956	0.778964	0.067886	0.854459	0.030232	-0.711627	0.112748	-0.175588	0.739324	0.0992886	0.851557
ENSDARG00000092725	ENSDARG00000092725	si:dkey-188i13.8	blue	0.607111	0.201219	-0.550236	0.25794	0.765619	0.0759637	-0.590803	0.216905	-0.519254	0.291121	-0.036107	0.945863	0.771036	0.0726353	0.351105	0.494984
ENSDARG00000093619	ENSDARG00000093619	sult3st2	blue	0.937911	0.00566287	-0.768043	0.0744657	0.990253	0.000142043	-0.767322	0.07491	-0.766098	0.0756671	0.449355	0.371335	0.230084	0.660964	0.0529281	0.920682
ENSDARG00000093647	ENSDARG00000093647	si:dkey-48g21.7	blue	0.665695	0.148959	-0.529302	0.280191	0.866289	0.0256226	-0.605529	0.20272	-0.513803	0.297116	-0.0596993	0.910557	0.575803	0.231749	0.33242	0.519737
ENSDARG00000094097	ENSDARG00000094097	CR936321.1	blue	0.837972	0.0372529	-0.605011	0.203213	0.98715	0.000246624	-0.762811	0.0777159	-0.710195	0.113811	0.360478	0.482704	0.17226	0.744165	-0.0441231	0.933858
ENSDARG00000094263	ENSDARG00000094263	CU539058.1	blue	0.82926	0.0412393	-0.778883	0.0679335	0.855617	0.0297649	-0.879508	0.020903	-0.712309	0.112243	0.473261	0.343108	0.625578	0.184042	-0.0503955	0.924471
ENSDARG00000095724	ENSDARG00000095724	si:ch211-196c10.15	blue	-0.922763	0.00871805	0.817627	0.0468571	-0.769564	0.0735332	0.620023	0.189143	0.713461	0.111394	-0.728557	0.100522	0.139572	0.792002	0.0804272	0.879619
ENSDARG00000095750	ENSDARG00000095750	fdxacb1	blue	0.841823	0.035551	-0.608059	0.200322	0.883911	0.0194327	-0.646224	0.165598	-0.581405	0.226159	0.439917	0.382693	-0.2042	0.697957	-0.0892927	0.866417
ENSDARG00000095817	ENSDARG00000095817	znhit6	blue	0.881356	0.0202794	-0.658979	0.154614	0.927434	0.00770777	-0.717634	0.10834	-0.695322	0.125102	0.519853	0.290465	-0.0760234	0.886185	-0.120092	0.820728
ENSDARG00000096060	ENSDARG00000096060	ccl39a.10	blue	0.826364	0.0426065	-0.623036	0.186369	0.976757	0.000804045	-0.76538	0.0761124	-0.574224	0.233335	0.210186	0.689364	0.25767	0.622048	0.0630508	0.905549
ENSDARG00000096269	ENSDARG00000096269	CR388364.1	blue	0.811458	0.049971	-0.744958	0.0892752	0.877302	0.0216585	-0.667918	0.147107	-0.826516	0.0425343	0.324812	0.529917	0.664066	0.150322	0.260335	0.618319
ENSDARG00000096849	ENSDARG00000096849	si:dkey-16p21.8	blue	0.73534	0.0957984	-0.541792	0.26683	0.914232	0.0107188	-0.562482	0.245257	-0.487209	0.327011	-0.031484	0.95279	0.279967	0.591021	0.330392	0.522445
ENSDARG00000097123	ENSDARG00000097123	FP102170.1	blue	-0.245301	0.639429	0.0438446	0.934275	-0.586713	0.220913	0.593094	0.214672	0.437142	0.386054	-0.0513421	0.923055	-0.47589	0.340053	0.271191	0.603186
ENSDARG00000097285	ENSDARG00000097285	ANPEP (1 of many)	blue	-0.891713	0.0169541	0.770604	0.0728979	-0.91277	0.0110818	0.924946	0.00823834	0.751344	0.0850573	-0.618101	0.190921	-0.350137	0.496258	0.223042	0.670985
ENSDARG00000097503	ENSDARG00000097503	si:ch73-288o11.5	blue	0.955809	0.0028861	-0.81794	0.0467014	0.969005	0.00142617	-0.848112	0.0328531	-0.752191	0.0845053	0.536119	0.272869	0.272386	0.601526	-0.0441781	0.933776
ENSDARG00000097924	ENSDARG00000097924	CU464134.1	blue	0.792012	0.0603898	-0.544986	0.263454	0.955042	0.00298644	-0.584286	0.223306	-0.603352	0.204792	0.158078	0.764858	0.06656	0.900308	0.17681	0.737549
ENSDARG00000098080	ENSDARG00000098080	gnl2	blue	0.828022	0.0418212	-0.672769	0.1431	0.965811	0.00173336	-0.780672	0.0668815	-0.756392	0.0817888	0.314987	0.543145	0.491613	0.321988	0.080235	0.879906
ENSDARG00000098121	ENSDARG00000098121	FP101882.1	blue	-0.66907	0.146151	0.564109	0.243591	-0.754437	0.0830477	0.661548	0.15244	0.170517	0.746703	0.0384817	0.942306	-0.277024	0.595093	-0.162724	0.758068
ENSDARG00000098222	ENSDARG00000098222	ccbl2	blue	0.883365	0.0196121	-0.83504	0.0385735	0.882121	0.0200241	-0.833724	0.0391729	-0.784008	0.0649407	0.504131	0.307866	0.594557	0.213252	0.0369178	0.944648
ENSDARG00000098433	ENSDARG00000098433	utp6	blue	0.879727	0.0208284	-0.665278	0.149307	0.938762	0.00551033	-0.672181	0.143583	-0.809603	0.0509255	0.525127	0.284713	0.0245737	0.963147	-0.0371807	0.944255
ENSDARG00000098507	ENSDARG00000098507	lyar	blue	0.73113	0.098718	-0.579774	0.227781	0.920731	0.00917631	-0.723549	0.104074	-0.694408	0.125811	0.173263	0.742706	0.585558	0.222051	0.144236	0.785146
ENSDARG00000098635	ENSDARG00000098635	irf2bp2b	blue	0.651024	0.161427	-0.365747	0.475843	0.855532	0.0297988	-0.361096	0.481898	-0.598239	0.209693	0.0679986	0.898159	-0.0850144	0.872786	0.246938	0.637122
ENSDARG00000098639	ENSDARG00000098639	pycr1b	blue	0.849011	0.0324754	-0.671448	0.144186	0.981183	0.000527804	-0.659979	0.153766	-0.702067	0.119923	0.200447	0.703357	0.350818	0.495361	0.251713	0.630405
ENSDARG00000098666	ENSDARG00000098666	si:dkey-93h22.8	blue	0.801565	0.055158	-0.547379	0.260935	0.972543	0.0011205	-0.634109	0.176322	-0.680596	0.136736	0.244197	0.640985	0.0956227	0.857003	0.0914758	0.863169
ENSDARG00000098694	ENSDARG00000098694	SLC16A2	blue	0.583754	0.223832	-0.544356	0.264119	0.730873	0.0988979	-0.574732	0.232824	-0.657213	0.156115	0.0840241	0.87426	0.843451	0.0348431	0.300592	0.562692
ENSDARG00000098859	ENSDARG00000098859	NOP14	blue	0.763572	0.0772392	-0.661361	0.152598	0.897897	0.0151053	-0.752316	0.0844238	-0.677797	0.138997	0.210217	0.689319	0.653167	0.159579	0.164068	0.756107
ENSDARG00000098915	ENSDARG00000098915	si:ch211-216p19.5	blue	0.830609	0.0406096	-0.579792	0.227763	0.965092	0.00180657	-0.668733	0.146431	-0.650528	0.161855	0.310612	0.549066	0.0131602	0.980261	0.0206453	0.969036
ENSDARG00000098935	ENSDARG00000098935	bxdc2	blue	0.762285	0.078046	-0.524278	0.285637	0.975347	0.000904149	-0.696073	0.124521	-0.640719	0.170436	0.165999	0.753288	0.268933	0.606325	0.0856935	0.871774
ENSDARG00000098999	ENSDARG00000098999	si:ch73-311h14.2	blue	0.778586	0.068109	-0.531563	0.277755	0.969179	0.00141029	-0.752151	0.0845309	-0.713073	0.11168	0.330821	0.521872	0.203049	0.699612	-0.078273	0.88283
ENSDARG00000099060	ENSDARG00000099060	zgc:111868	blue	0.451774	0.368443	-0.23397	0.655449	0.579553	0.228001	0.020403	0.9694	-0.302801	0.55968	-0.202613	0.700239	-0.266931	0.609114	0.540423	0.268283
ENSDARG00000099080	ENSDARG00000099080	sbno1	blue	0.248638	0.634729	-0.00211953	0.996821	0.652654	0.160021	-0.390496	0.444028	-0.227108	0.665195	-0.380619	0.456641	0.365536	0.476116	0.160716	0.761002
ENSDARG00000099528	ENSDARG00000099528	dus3l	blue	0.860539	0.027818	-0.708427	0.115128	0.96607	0.00170732	-0.773755	0.0709897	-0.831963	0.039982	0.415537	0.41257	0.44875	0.372059	0.0539534	0.919148
ENSDARG00000099534	ENSDARG00000099534	CABZ01066926.1	blue	0.562967	0.24476	-0.456539	0.362769	0.773179	0.071337	-0.747435	0.0876284	-0.551461	0.256661	0.12141	0.81878	0.720543	0.106232	0.00375647	0.994365
ENSDARG00000099633	ENSDARG00000099633	sec14l7	blue	0.887175	0.018376	-0.716184	0.109396	0.961995	0.00213914	-0.730577	0.0991048	-0.563986	0.243718	0.251755	0.630346	0.197297	0.707895	0.136059	0.797171
ENSDARG00000099677	ENSDARG00000099677	bambib	blue	0.8279	0.0418791	-0.5945	0.213307	0.974824	0.000942793	-0.616532	0.192378	-0.668917	0.146278	0.219061	0.676664	0.122031	0.817862	0.171012	0.745982
ENSDARG00000099742	ENSDARG00000099742	heatr1	blue	0.720237	0.106453	-0.555667	0.252285	0.925157	0.00819258	-0.671379	0.144243	-0.693714	0.12635	0.12205	0.817834	0.55882	0.249024	0.206743	0.694304
ENSDARG00000099900	ENSDARG00000099900	peo1	blue	0.839982	0.03636	-0.620609	0.188602	0.882146	0.0200159	-0.533111	0.27609	-0.577566	0.229984	0.315632	0.542274	-0.161471	0.759899	0.124903	0.813619
ENSDARG00000100206	ENSDARG00000100206	klhdc4	blue	0.742833	0.0906985	-0.475075	0.340999	0.930784	0.00702042	-0.786056	0.0637615	-0.574506	0.233051	0.330876	0.521798	0.0491387	0.926351	-0.217824	0.678432
ENSDARG00000100242	ENSDARG00000100242	dph5	blue	0.925302	0.00816129	-0.794929	0.0587689	0.973125	0.00107367	-0.830568	0.0406287	-0.783005	0.0655215	0.47213	0.344426	0.399237	0.432962	0.0225155	0.966232
ENSDARG00000100374	ENSDARG00000100374	txnrd1	blue	0.406384	0.42398	-0.21301	0.685317	0.609071	0.199366	0.0137686	0.979348	-0.325786	0.52861	-0.373889	0.4653	0.0469546	0.92962	0.694563	0.12569
ENSDARG00000100597	ENSDARG00000100597	ubxn4	blue	-0.77267	0.0716444	0.702985	0.119225	-0.725969	0.102351	0.934978	0.00620427	0.684043	0.133972	-0.786902	0.0632775	-0.298647	0.565348	0.482112	0.332861
ENSDARG00000101024	ENSDARG00000101024	nufip1	blue	0.899108	0.0147553	-0.700112	0.121415	0.893595	0.0163808	-0.654668	0.15829	-0.71694	0.108845	0.560019	0.247788	-0.120419	0.820244	-0.0627544	0.905992
ENSDARG00000101089	ENSDARG00000101089	gart	blue	0.929206	0.00734026	-0.7895	0.061802	0.97349	0.00104484	-0.688028	0.130808	-0.826539	0.0425236	0.406277	0.424114	0.340298	0.509257	0.201322	0.702097
ENSDARG00000101259	ENSDARG00000101259	hgh1	blue	0.810679	0.0503709	-0.582001	0.225568	0.859387	0.0282679	-0.744158	0.0898096	-0.704389	0.118163	0.628451	0.181427	-0.122915	0.816556	-0.315358	0.542644
ENSDARG00000101338	ENSDARG00000101338	BX005294.2	blue	-0.960175	0.00234741	0.8364	0.0379583	-0.89372	0.0163429	0.825683	0.042931	0.772262	0.0718914	-0.715288	0.110052	-0.104319	0.844089	0.174573	0.740801
ENSDARG00000101343	ENSDARG00000101343	CR293511.2	blue	0.663682	0.150645	-0.387368	0.448011	0.794646	0.0589252	-0.482004	0.332985	-0.341418	0.507771	0.133394	0.801096	-0.317214	0.540139	0.00918017	0.98623
ENSDARG00000101578	ENSDARG00000101578	e2f4	blue	0.883823	0.0194616	-0.71088	0.113301	0.989864	0.000153586	-0.80577	0.0529242	-0.665939	0.148755	0.321734	0.534051	0.323345	0.531885	0.0518463	0.9223
ENSDARG00000101722	ENSDARG00000101722	larp1	blue	0.849407	0.0323097	-0.648298	0.16379	0.978159	0.000710358	-0.666968	0.147897	-0.620391	0.188803	0.191882	0.71571	0.2133	0.684903	0.195647	0.710274
ENSDARG00000101877	ENSDARG00000101877	rbm34	blue	0.901994	0.0139369	-0.759043	0.0800953	0.979281	0.000639465	-0.823566	0.0439475	-0.766705	0.075291	0.421547	0.405134	0.413367	0.415267	0.0340931	0.94888
ENSDARG00000102089	ENSDARG00000102089	SNORA3	blue	0.866839	0.0254172	-0.65203	0.160558	0.874114	0.0227735	-0.687529	0.131203	-0.606565	0.201736	0.528163	0.281423	-0.19696	0.70838	-0.149977	0.776722
ENSDARG00000102120	ENSDARG00000102120	SNORA74	blue	0.959686	0.00240508	-0.833077	0.0394693	0.914937	0.0105459	-0.849991	0.0320664	-0.773973	0.0708587	0.685316	0.132958	0.160091	0.761915	-0.165672	0.753765
ENSDARG00000102254	ENSDARG00000102254	pycr1a	blue	0.925805	0.00805305	-0.776491	0.0693513	0.944529	0.00453024	-0.593476	0.214301	-0.835228	0.0384877	0.42068	0.406204	0.208646	0.691573	0.2455	0.639149
ENSDARG00000102353	ENSDARG00000102353	ddx47	blue	0.775138	0.0701593	-0.528396	0.281171	0.971779	0.00118343	-0.664778	0.149725	-0.600132	0.207873	0.152455	0.773089	0.170699	0.746438	0.107159	0.839876
ENSDARG00000102464	ENSDARG00000102464	wnt5b	blue	0.772028	0.0720329	-0.584366	0.223227	0.829475	0.0411387	-0.319457	0.537115	-0.615561	0.193281	0.136423	0.796635	-0.0333565	0.949984	0.437724	0.385349
ENSDARG00000102590	ENSDARG00000102590	polr3h	blue	0.889578	0.0176162	-0.734374	0.096465	0.98083	0.000547691	-0.705955	0.116982	-0.824634	0.0434332	0.36438	0.477619	0.393872	0.439744	0.173879	0.741811
ENSDARG00000102593	ENSDARG00000102593	si:ch211-214b16.2	blue	0.858607	0.0285748	-0.681085	0.136342	0.984584	0.000354668	-0.734407	0.0964424	-0.642534	0.168834	0.223234	0.670711	0.330816	0.521879	0.160013	0.762029
ENSDARG00000102618	ENSDARG00000102618	utp18	blue	0.666244	0.1485	-0.636399	0.174273	0.771802	0.0721697	-0.695394	0.125046	-0.616087	0.192792	0.161873	0.759311	0.809568	0.0509438	0.209855	0.689838
ENSDARG00000103337	ENSDARG00000103337	rrp1	blue	0.805268	0.0531888	-0.652339	0.160292	0.94914	0.0038144	-0.817006	0.0471665	-0.738606	0.0935599	0.335605	0.515492	0.509017	0.302417	0.00719551	0.989207
ENSDARG00000103422	ENSDARG00000103422	usp10	blue	0.700869	0.120836	-0.445067	0.376479	0.847962	0.0329162	-0.362084	0.48061	-0.534135	0.274992	0.0655878	0.901759	-0.120863	0.819589	0.300583	0.562704
ENSDARG00000103428	ENSDARG00000103428	ogdhb	blue	0.879595	0.0208731	-0.666693	0.148126	0.988481	0.000198277	-0.800414	0.0557764	-0.698645	0.122538	0.411379	0.417741	0.164095	0.756067	-0.0643034	0.903678
ENSDARG00000103435	ENSDARG00000103435	sorbs1	blue	-0.806289	0.0526514	0.737431	0.0943627	-0.616081	0.192797	0.546711	0.261637	0.785543	0.0640563	-0.879442	0.0209251	0.135376	0.798177	0.216735	0.679989
ENSDARG00000103479	ENSDARG00000103479	ptprfa	blue	0.622247	0.187094	-0.516884	0.293722	0.761973	0.0782423	-0.294941	0.570417	-0.490448	0.323314	-0.193024	0.71406	0.453492	0.366394	0.667072	0.147811
ENSDARG00000103503	ENSDARG00000103503	dgat1a	blue	0.673328	0.142642	-0.427617	0.397671	0.907811	0.0123563	-0.504161	0.307831	-0.498419	0.314281	-0.0625396	0.906313	0.179243	0.734015	0.292249	0.574107
ENSDARG00000103785	ENSDARG00000103785	sult2st2	blue	0.830403	0.0407056	-0.655183	0.157849	0.952153	0.00337921	-0.541029	0.267639	-0.725341	0.102797	0.159877	0.762228	0.309322	0.550815	0.37127	0.468683
ENSDARG00000103883	ENSDARG00000103883	si:ch1073-181h11.2	blue	0.544835	0.263613	-0.244865	0.640043	0.656586	0.15665	-0.387298	0.448101	-0.38347	0.45299	0.303852	0.558249	-0.537138	0.271779	-0.209721	0.690031
ENSDARG00000103923	ENSDARG00000103923	tfap4	blue	0.876581	0.0219085	-0.768238	0.0743458	0.811283	0.0500606	-0.877968	0.021429	-0.764356	0.0767496	0.811236	0.0500848	0.140867	0.790097	-0.372445	0.467164
ENSDARG00000103961	ENSDARG00000103961	poln	blue	0.378539	0.459313	-0.19465	0.711713	0.476928	0.338849	0.158758	0.763864	-0.285946	0.582771	-0.240272	0.646528	-0.268244	0.607284	0.635458	0.175114
ENSDARG00000104052	ENSDARG00000104052	CR388413.4	blue	0.680279	0.136991	-0.542061	0.266545	0.87472	0.0225596	-0.602871	0.205251	-0.520856	0.289368	-0.0520406	0.92201	0.558535	0.249318	0.341894	0.507142
ENSDARG00000104068	ENSDARG00000104068	gstp1	blue	0.899941	0.0145167	-0.726766	0.101786	0.965159	0.00179972	-0.595963	0.211891	-0.794504	0.0590041	0.336191	0.514713	0.216152	0.680821	0.258388	0.621044
ENSDARG00000104106	ENSDARG00000104106	CABZ01087953.1	blue	0.955182	0.00296802	-0.834731	0.0387139	0.963509	0.0019731	-0.768138	0.0744077	-0.684695	0.133452	0.395976	0.43708	0.299788	0.563789	0.13901	0.792828
ENSDARG00000104207	ENSDARG00000104207	pcyt1bb	blue	0.626404	0.183289	-0.60228	0.205816	0.538146	0.270705	-0.784348	0.0647439	-0.719032	0.107324	0.868536	0.0247882	0.291432	0.575227	-0.529811	0.279643
ENSDARG00000104221	ENSDARG00000104221	sat2b	blue	0.754956	0.082713	-0.532496	0.276752	0.962025	0.00213574	-0.614226	0.194527	-0.620576	0.188632	0.0754528	0.887036	0.296166	0.568741	0.233653	0.655898
ENSDARG00000104227	ENSDARG00000104227	nop10	blue	0.774528	0.0705252	-0.536057	0.272934	0.867119	0.025313	-0.738322	0.0937539	-0.750813	0.0854046	0.599117	0.208849	-0.0404438	0.939367	-0.308022	0.552579
ENSDARG00000104353	ENSDARG00000104353	nop58	blue	0.89367	0.016358	-0.69742	0.123481	0.997379	1.02959e-05	-0.775324	0.0700483	-0.752834	0.0840868	0.402388	0.428994	0.241528	0.644752	0.016707	0.974942
ENSDARG00000104531	ENSDARG00000104531	zcchc4	blue	0.864146	0.0264307	-0.636522	0.174163	0.975449	0.000896719	-0.765934	0.0757683	-0.74043	0.0923205	0.451161	0.369175	0.106783	0.840434	-0.0909822	0.863903
ENSDARG00000104637	ENSDARG00000104637	fam219b	blue	0.629596	0.180389	-0.565175	0.242502	0.760072	0.0794425	-0.365061	0.476734	-0.613731	0.194989	-0.0903089	0.864905	0.659255	0.15438	0.619726	0.189417
ENSDARG00000104654	ENSDARG00000104654	leap2	blue	0.602935	0.20519	-0.340737	0.508674	0.795786	0.058297	-0.638614	0.172302	-0.199531	0.704676	0.0286072	0.957101	-0.12166	0.81841	-0.104827	0.843336
ENSDARG00000104708	ENSDARG00000104708	ddx24	blue	0.772363	0.0718301	-0.653857	0.158986	0.903956	0.0133937	-0.796961	0.057652	-0.761509	0.0785346	0.342584	0.506227	0.611602	0.196984	0.0297454	0.955395
ENSDARG00000104858	ENSDARG00000104858	znf740a	blue	0.481866	0.333145	-0.230757	0.660008	0.811842	0.0497747	-0.363403	0.478892	-0.502369	0.309839	-0.223848	0.669837	0.32242	0.533128	0.362913	0.47953
ENSDARG00000104869	ENSDARG00000104869	SPATA5	blue	0.866213	0.0256512	-0.67096	0.144589	0.940836	0.00514705	-0.790687	0.0611327	-0.830975	0.0404399	0.582592	0.224982	0.174009	0.741621	-0.161708	0.759552
ENSDARG00000104938	ENSDARG00000104938	ftsj3	blue	0.77711	0.0689834	-0.72143	0.105593	0.856581	0.0293784	-0.745541	0.0888858	-0.732077	0.0980579	0.29665	0.568078	0.717912	0.108137	0.170502	0.746726
ENSDARG00000105079	ENSDARG00000105079	BX649411.2	blue	0.837184	0.0376055	-0.747	0.0879164	0.719864	0.106722	-0.79492	0.0587743	-0.76858	0.074136	0.890783	0.0172411	0.0359208	0.946142	-0.406645	0.423654
ENSDARG00000105117	ENSDARG00000105117	sdad1	blue	0.733647	0.0969678	-0.580065	0.227491	0.924911	0.00824582	-0.718089	0.108008	-0.656612	0.156627	0.135263	0.798343	0.569163	0.238445	0.169133	0.748719
ENSDARG00000105286	ENSDARG00000105286	ddx54	blue	0.835206	0.038498	-0.759648	0.0797113	0.898495	0.014932	-0.797047	0.0576053	-0.776495	0.0693491	0.393898	0.439711	0.633686	0.176702	0.0921421	0.862178
ENSDARG00000105558	ENSDARG00000105558	btr07	blue	0.803962	0.0538793	-0.642861	0.168546	0.95121	0.00351258	-0.708741	0.114894	-0.571256	0.236326	0.115733	0.827175	0.412326	0.416561	0.217989	0.678196
ENSDARG00000105708	ENSDARG00000105708	or109-11	blue	0.795952	0.0582054	-0.555317	0.252648	0.945669	0.00434765	-0.616413	0.192488	-0.535394	0.273643	0.151337	0.774727	0.0411257	0.938346	0.14204	0.788373
ENSDARG00000000241	ENSDARG00000000241	slc40a1	brown	-0.696153	0.124458	0.625584	0.184037	-0.674707	0.141513	0.309938	0.54998	0.980202	0.000584034	-0.500685	0.311729	-0.32337	0.531853	-0.297147	0.567398
ENSDARG00000000540	ENSDARG00000000540	asnsd1	brown	-0.720028	0.106604	0.709552	0.114289	-0.609947	0.198541	0.255983	0.624412	0.936686	0.00588606	-0.52333	0.286669	-0.314615	0.543648	-0.382463	0.454279
ENSDARG00000002194	ENSDARG00000002194	rhd	brown	-0.625365	0.184237	0.581251	0.226312	-0.591721	0.21601	0.290893	0.575968	0.978343	0.00069847	-0.542566	0.26601	-0.365338	0.476374	-0.229751	0.661437
ENSDARG00000002644	ENSDARG00000002644	rgs5a	brown	-0.802187	0.0548245	0.698652	0.122533	-0.758549	0.0804095	0.597182	0.210713	0.965761	0.0017384	-0.742604	0.0908526	-0.20724	0.69359	0.0844746	0.87359
ENSDARG00000002897	ENSDARG00000002897	INPP1	brown	-0.25952	0.61946	0.198902	0.705581	-0.273895	0.599431	-0.329227	0.524002	0.63596	0.174666	-0.0218552	0.967222	-0.0487636	0.926913	-0.669048	0.146169
ENSDARG00000003381	ENSDARG00000003381	si:ch211-266g18.6	brown	0.223626	0.670153	-0.177864	0.736018	0.19673	0.708713	-0.303376	0.558897	0.464099	0.353832	-0.191756	0.715891	-0.267748	0.607976	-0.0631066	0.905466
ENSDARG00000004363	ENSDARG00000004363	lhfp	brown	-0.781835	0.066202	0.684073	0.133949	-0.773593	0.0710875	0.48813	0.325959	0.996266	2.08841e-05	-0.590012	0.217678	-0.318724	0.538103	-0.141966	0.788482
ENSDARG00000004402	ENSDARG00000004402	elovl6	brown	-0.659807	0.153912	0.636452	0.174226	-0.600728	0.207301	0.292192	0.574184	0.973039	0.00108056	-0.533957	0.275182	-0.396571	0.436327	-0.290076	0.577089
ENSDARG00000004586	ENSDARG00000004586	ntrk1	brown	-0.449555	0.371095	0.2848	0.58435	-0.600585	0.207439	0.316921	0.540534	0.898616	0.014897	-0.409361	0.420258	-0.274918	0.598013	-0.00968252	0.985477
ENSDARG00000004830	ENSDARG00000004830	flot2a	brown	-0.816635	0.0473516	0.825737	0.0429055	-0.687514	0.131215	0.411143	0.418035	0.932802	0.00662173	-0.567902	0.239725	-0.415106	0.413105	-0.339282	0.510605
ENSDARG00000005095	ENSDARG00000005095	glcea	brown	-0.877173	0.0217031	0.77957	0.0675285	-0.894579	0.0160845	0.66843	0.146682	0.944007	0.00461505	-0.534495	0.274606	-0.454051	0.365728	-0.135604	0.797841
ENSDARG00000005163	ENSDARG00000005163	efr3a	brown	0.305988	0.555343	-0.0212797	0.968085	0.573005	0.234562	-0.601791	0.206283	-0.425513	0.400253	0.332315	0.519877	-0.080603	0.879357	-0.586337	0.221284
ENSDARG00000005652	ENSDARG00000005652	man1a1	brown	-0.898568	0.0149108	0.881758	0.0201453	-0.737309	0.0944458	0.52672	0.282985	0.91536	0.0104426	-0.699027	0.122245	-0.260008	0.618777	-0.172057	0.744461
ENSDARG00000007241	ENSDARG00000007241	mycb	brown	-0.131188	0.804347	-0.0673494	0.899129	-0.442554	0.379507	0.614899	0.193898	0.275748	0.596861	-0.135956	0.797322	-0.297779	0.566533	0.543769	0.264738
ENSDARG00000007867	ENSDARG00000007867	dazap2	brown	-0.861137	0.0275855	0.885463	0.0189269	-0.703774	0.118628	0.514914	0.29589	0.91704	0.0100381	-0.645847	0.165927	-0.432097	0.392192	-0.241019	0.645472
ENSDARG00000008100	ENSDARG00000008100	slc7a10a	brown	-0.816528	0.0474047	0.737365	0.0944078	-0.787345	0.0630246	0.498791	0.313862	0.990245	0.000142273	-0.580502	0.227057	-0.355148	0.489675	-0.194067	0.712555
ENSDARG00000008573	ENSDARG00000008573	fam20b	brown	-0.455056	0.364531	0.572191	0.235382	-0.12671	0.810952	0.0215705	0.967649	0.647011	0.164911	-0.722672	0.104702	0.0267904	0.959824	-0.116754	0.825665
ENSDARG00000011072	ENSDARG00000011072	ddx11	brown	-0.419369	0.407824	0.421172	0.405597	-0.39176	0.442423	0.238308	0.649305	0.898889	0.0148182	-0.552504	0.255573	-0.450915	0.369468	-0.0759161	0.886345
ENSDARG00000011166	ENSDARG00000011166	cahz	brown	-0.509034	0.302399	0.410599	0.418714	-0.548549	0.259707	0.17118	0.745738	0.940694	0.00517152	-0.433841	0.390066	-0.255249	0.625441	-0.236263	0.6522
ENSDARG00000012405	ENSDARG00000012405	col1a1a	brown	0.747238	0.0877587	-0.624581	0.184954	0.76172	0.0784014	-0.700633	0.121017	-0.921027	0.00910874	0.732916	0.0974748	0.270838	0.603677	-0.241456	0.644854
ENSDARG00000012632	ENSDARG00000012632	zgc:92749	brown	-0.89403	0.0162495	0.827544	0.0420473	-0.83304	0.0394865	0.656054	0.157104	0.9598	0.0023916	-0.672062	0.143681	-0.370567	0.469593	-0.0667514	0.900022
ENSDARG00000013222	ENSDARG00000013222	slc35a3a	brown	-0.685229	0.133027	0.584112	0.223477	-0.706568	0.116521	0.376217	0.462299	0.991752	0.000101773	-0.51892	0.291487	-0.324723	0.530035	-0.193583	0.713252
ENSDARG00000013236	ENSDARG00000013236	dhcr24	brown	-0.543387	0.265142	0.434971	0.388692	-0.613615	0.195097	0.275039	0.597844	0.960018	0.00236591	-0.438485	0.384426	-0.3416	0.507531	-0.187491	0.722059
ENSDARG00000013576	ENSDARG00000013576	gadd45bb	brown	-0.578225	0.229326	0.479464	0.335915	-0.612804	0.195856	0.213285	0.684924	0.957707	0.00264524	-0.424625	0.401344	-0.284992	0.584086	-0.288077	0.579838
ENSDARG00000014053	ENSDARG00000014053	olfm1b	brown	-0.652918	0.159793	0.684181	0.133862	-0.489568	0.324317	0.453293	0.36663	0.912	0.0112752	-0.811329	0.0500369	-0.332413	0.519746	0.0697626	0.895526
ENSDARG00000014333	ENSDARG00000014333	ormdl1	brown	-0.782821	0.0656284	0.765321	0.0761492	-0.709786	0.114115	0.516992	0.293602	0.979473	0.000627695	-0.629838	0.18017	-0.479302	0.336102	-0.16193	0.759228
ENSDARG00000015551	ENSDARG00000015551	fth1a	brown	-0.800668	0.0556396	0.810246	0.0505936	-0.680488	0.136823	0.487292	0.326917	0.959733	0.00239951	-0.647041	0.164885	-0.45665	0.362637	-0.204177	0.697991
ENSDARG00000016301	ENSDARG00000016301	zgc:65894	brown	-0.854274	0.030307	0.892111	0.0168322	-0.658693	0.154856	0.541039	0.267629	0.903588	0.0134947	-0.742484	0.0909334	-0.375431	0.463311	-0.130383	0.805534
ENSDARG00000017960	ENSDARG00000017960	sfxn2	brown	-0.58606	0.221556	0.509642	0.301723	-0.591454	0.21627	0.364274	0.477758	0.972902	0.00109151	-0.596288	0.211576	-0.330042	0.522913	-0.0503065	0.924604
ENSDARG00000018524	ENSDARG00000018524	midn	brown	-0.432782	0.391358	0.555727	0.252222	-0.154334	0.770337	0.0366498	0.94505	0.72981	0.0996418	-0.681951	0.135647	-0.163282	0.757254	-0.165479	0.754047
ENSDARG00000018820	ENSDARG00000018820	flncb	brown	-0.549953	0.258237	0.439633	0.383036	-0.601965	0.206117	0.224221	0.669305	0.954996	0.00299251	-0.435771	0.387719	-0.27295	0.600743	-0.228811	0.662773
ENSDARG00000019235	ENSDARG00000019235	sema3aa	brown	-0.818949	0.0462016	0.806048	0.052778	-0.663109	0.151126	0.369095	0.471499	0.921172	0.00907583	-0.630411	0.179652	-0.230689	0.660104	-0.282543	0.587463
ENSDARG00000019417	ENSDARG00000019417	gadd45ga	brown	-0.604337	0.203853	0.456331	0.363017	-0.705268	0.117499	0.41867	0.408688	0.961499	0.00219491	-0.487939	0.326177	-0.312007	0.547176	-0.0528504	0.920798
ENSDARG00000019930	ENSDARG00000019930	tal1	brown	-0.552596	0.255477	0.444335	0.377361	-0.604924	0.203295	0.31309	0.54571	0.963552	0.00196844	-0.511752	0.299383	-0.301336	0.561678	-0.0993493	0.851466
ENSDARG00000021154	ENSDARG00000021154	PRODH2	brown	-0.0708646	0.893881	0.028583	0.957137	-0.115021	0.828229	-0.0750548	0.887629	0.704515	0.118067	-0.38159	0.455397	-0.188344	0.720825	-0.0043046	0.993543
ENSDARG00000022456	ENSDARG00000022456	eno1a	brown	-0.696585	0.124124	0.678808	0.138178	-0.613204	0.195483	0.312689	0.546253	0.971552	0.00120239	-0.566513	0.241138	-0.370107	0.470189	-0.284218	0.585153
ENSDARG00000024325	ENSDARG00000024325	col4a3bpa	brown	-0.812594	0.0493905	0.752086	0.0845732	-0.767156	0.0750125	0.532134	0.27714	0.992009	9.55217e-05	-0.624756	0.184793	-0.393055	0.440779	-0.143927	0.7856
ENSDARG00000025428	ENSDARG00000025428	socs3a	brown	-0.849965	0.0320769	0.740396	0.0923438	-0.863776	0.0265715	0.770684	0.0728492	0.922481	0.00878096	-0.664768	0.149734	-0.387773	0.447495	0.112595	0.831821
ENSDARG00000025559	ENSDARG00000025559	pex11g	brown	-0.809916	0.0507639	0.766117	0.075655	-0.731692	0.0983264	0.449853	0.370738	0.980538	0.000564445	-0.605168	0.203063	-0.351378	0.494624	-0.232559	0.657451
ENSDARG00000025679	ENSDARG00000025679	comtb	brown	-0.522162	0.287941	0.389187	0.445694	-0.592992	0.214771	0.257775	0.621901	0.943146	0.00475664	-0.474662	0.341479	-0.217438	0.678984	-0.111041	0.834123
ENSDARG00000025953	ENSDARG00000025953	rhoq	brown	-0.600802	0.207231	0.514421	0.296433	-0.607669	0.200691	0.259429	0.619587	0.971863	0.00117644	-0.503618	0.30844	-0.280496	0.590291	-0.218895	0.676901
ENSDARG00000026028	ENSDARG00000026028	ankrd44	brown	-0.790569	0.061199	0.82882	0.0414458	-0.62141	0.187864	0.404928	0.425806	0.923533	0.0085472	-0.63722	0.173542	-0.408307	0.421575	-0.278542	0.592993
ENSDARG00000026787	ENSDARG00000026787	aqp7	brown	-0.737478	0.0943304	0.684698	0.13345	-0.594568	0.213242	0.334289	0.517244	0.917805	0.00985631	-0.720118	0.106539	-0.0479601	0.928115	-0.0983262	0.852986
ENSDARG00000027744	ENSDARG00000027744	gadd45ba	brown	-0.575059	0.232496	0.385589	0.450281	-0.739017	0.09328	0.675901	0.140538	0.816432	0.0474527	-0.530132	0.279296	-0.298164	0.566007	0.306982	0.553992
ENSDARG00000031382	ENSDARG00000031382	reep2	brown	-0.694648	0.125624	0.633258	0.177086	-0.722253	0.105002	0.627014	0.182733	0.945055	0.00444554	-0.599893	0.208102	-0.547869	0.260421	0.0339494	0.949095
ENSDARG00000031952	ENSDARG00000031952	mb	brown	-0.852328	0.0311006	0.787831	0.0627482	-0.788291	0.0624868	0.497605	0.315199	0.973454	0.0010477	-0.595104	0.212722	-0.328603	0.524836	-0.223535	0.670282
ENSDARG00000033182	ENSDARG00000033182	arl4ab	brown	-0.57839	0.229161	0.401612	0.429971	-0.716719	0.109006	0.78949	0.0618074	0.717345	0.10855	-0.590795	0.216913	-0.267241	0.608681	0.472958	0.343461
ENSDARG00000033501	ENSDARG00000033501	zgc:64189	brown	-0.725574	0.102631	0.634189	0.17625	-0.74612	0.0885007	0.590896	0.216814	0.977718	0.000739219	-0.634691	0.175801	-0.415091	0.413123	0.0303475	0.954493
ENSDARG00000033993	ENSDARG00000033993	slc19a1	brown	-0.767795	0.0746185	0.71023	0.113784	-0.723219	0.10431	0.403808	0.42721	0.986879	0.000257099	-0.549846	0.258349	-0.364279	0.477751	-0.26714	0.608822
ENSDARG00000034056	ENSDARG00000034056	csnk1g2b	brown	-0.846386	0.0335833	0.791775	0.0605224	-0.807569	0.0519818	0.666747	0.148081	0.963174	0.00200921	-0.653821	0.159017	-0.467593	0.349728	-0.045269	0.932143
ENSDARG00000035632	ENSDARG00000035632	ccl19a.2	brown	-0.417885	0.409659	0.283662	0.585919	-0.519009	0.291389	0.135138	0.798528	0.899151	0.014743	-0.365214	0.476535	-0.216893	0.679762	-0.185837	0.724453
ENSDARG00000035809	ENSDARG00000035809	col1a1b	brown	0.695839	0.124701	-0.57766	0.22989	0.819845	0.0457603	-0.708535	0.115048	-0.876978	0.0217706	0.458871	0.360005	0.575521	0.232032	-0.0437395	0.934433
ENSDARG00000036489	ENSDARG00000036489	MAF1	brown	-0.814759	0.0482933	0.80204	0.0549033	-0.701	0.120736	0.506403	0.305327	0.971754	0.00118549	-0.680922	0.136474	-0.391633	0.442584	-0.152282	0.773342
ENSDARG00000037941	ENSDARG00000037941	syt5a	brown	-0.402233	0.429189	0.27759	0.59431	-0.504935	0.306967	0.120788	0.8197	0.896225	0.015595	-0.345707	0.502098	-0.252657	0.629078	-0.20912	0.690892
ENSDARG00000038121	ENSDARG00000038121	si:ch211-13k12.2	brown	-0.85456	0.0301908	0.83752	0.037455	-0.743315	0.0903745	0.469416	0.347594	0.944977	0.00445798	-0.586877	0.220752	-0.384944	0.451105	-0.292509	0.573751
ENSDARG00000038446	ENSDARG00000038446	nrp2b	brown	0.697014	0.123794	-0.612674	0.195978	0.792594	0.0600648	-0.699542	0.12185	-0.877657	0.021536	0.465812	0.351818	0.639321	0.171674	-0.00650628	0.990241
ENSDARG00000038643	ENSDARG00000038643	alas2	brown	-0.467528	0.349804	0.368826	0.471847	-0.531769	0.277532	0.189298	0.719445	0.933877	0.00641384	-0.422242	0.404277	-0.307598	0.553155	-0.191585	0.716139
ENSDARG00000038703	ENSDARG00000038703	hkdc1	brown	-0.793568	0.0595226	0.735782	0.095494	-0.73763	0.0942266	0.412813	0.415955	0.979916	0.000600984	-0.555586	0.252369	-0.341609	0.507519	-0.276577	0.595713
ENSDARG00000039943	ENSDARG00000039943	fam46ba	brown	-0.782898	0.0655834	0.686826	0.131759	-0.783277	0.0653636	0.521116	0.289084	0.996836	1.49964e-05	-0.591746	0.215985	-0.357576	0.486496	-0.119618	0.821429
ENSDARG00000040045	ENSDARG00000040045	cldn1	brown	-0.795499	0.0584546	0.802586	0.0546118	-0.669359	0.145912	0.451784	0.36843	0.960164	0.00234873	-0.642596	0.168779	-0.42004	0.406994	-0.226612	0.6659
ENSDARG00000040123	ENSDARG00000040123	zfpm2a	brown	0.168767	0.749253	-0.0772895	0.884297	0.259699	0.619209	0.414414	0.413964	-0.477164	0.338575	-0.23174	0.658613	0.0313561	0.952981	0.789791	0.0616372
ENSDARG00000040133	ENSDARG00000040133	ackr4b	brown	-0.855324	0.0298828	0.727615	0.101186	-0.864895	0.026147	0.59585	0.212	0.970427	0.00129888	-0.590698	0.217007	-0.285051	0.584004	-0.0913014	0.863428
ENSDARG00000040874	ENSDARG00000040874	add3a	brown	-0.808065	0.0517233	0.759716	0.0796677	-0.732744	0.0975939	0.422868	0.403506	0.974977	0.000931356	-0.579839	0.227716	-0.332968	0.519005	-0.267617	0.608157
ENSDARG00000040898	ENSDARG00000040898	gpa33	brown	-0.940528	0.00520017	0.879395	0.0209411	-0.875651	0.0222325	0.716299	0.109312	0.91269	0.0111018	-0.638156	0.172708	-0.400086	0.431892	-0.0866691	0.870322
ENSDARG00000041787	ENSDARG00000041787	cx32.3	brown	-0.910521	0.0116515	0.867472	0.0251818	-0.82222	0.044599	0.644687	0.166943	0.943944	0.00462538	-0.663227	0.151027	-0.393928	0.439673	-0.117598	0.824416
ENSDARG00000041799	ENSDARG00000041799	cx43	brown	-0.818044	0.04665	0.793119	0.0597723	-0.758204	0.0806294	0.6106	0.197925	0.965189	0.00179657	-0.639996	0.171075	-0.513456	0.297499	-0.10448	0.84385
ENSDARG00000042641	ENSDARG00000042641	cyp51	brown	-0.501873	0.310395	0.398485	0.43391	-0.548647	0.259605	0.19221	0.715236	0.941667	0.00500489	-0.449737	0.370877	-0.255194	0.625518	-0.193948	0.712726
ENSDARG00000042727	ENSDARG00000042727	exo5	brown	-0.906985	0.0125754	0.878917	0.021104	-0.792759	0.0599731	0.567645	0.239986	0.933839	0.00642115	-0.634945	0.175573	-0.365757	0.47583	-0.20883	0.691308
ENSDARG00000042861	ENSDARG00000042861	ltk	brown	-0.500252	0.312216	0.303645	0.558531	-0.690245	0.129062	0.812663	0.0493556	0.578775	0.228777	-0.479928	0.335379	-0.254942	0.625872	0.536541	0.272418
ENSDARG00000043196	ENSDARG00000043196	rnasel2	brown	-0.485241	0.329266	0.274444	0.59867	-0.705055	0.11766	0.66895	0.14625	0.724132	0.103658	-0.434111	0.389738	-0.295626	0.56948	0.356507	0.487895
ENSDARG00000043667	ENSDARG00000043667	zgc:100997	brown	-0.901071	0.0141964	0.81973	0.0458168	-0.850718	0.0317642	0.629492	0.180483	0.959966	0.00237194	-0.640101	0.170983	-0.33598	0.514993	-0.107907	0.838768
ENSDARG00000044212	ENSDARG00000044212	zmp:0000001081	brown	-0.758523	0.0804264	0.773022	0.0714319	-0.668113	0.146945	0.51921	0.291169	0.956362	0.00281489	-0.62805	0.181792	-0.549595	0.258612	-0.163144	0.757455
ENSDARG00000044415	ENSDARG00000044415	tlr5a	brown	-0.88085	0.0204494	0.84539	0.0340083	-0.772283	0.0718781	0.509479	0.301904	0.947645	0.00403981	-0.621532	0.187751	-0.332267	0.51994	-0.236647	0.651655
ENSDARG00000045147	ENSDARG00000045147	tmem184ba	brown	-0.857426	0.0290421	0.87596	0.0221245	-0.691218	0.128299	0.470425	0.346415	0.915005	0.0105292	-0.64374	0.167773	-0.371015	0.469013	-0.264473	0.61254
ENSDARG00000045150	ENSDARG00000045150	csnk1e	brown	-0.740546	0.0922419	0.727859	0.101014	-0.64624	0.165584	0.332229	0.519992	0.962105	0.00212684	-0.549568	0.25864	-0.381727	0.455221	-0.330173	0.522737
ENSDARG00000045516	ENSDARG00000045516	itih2	brown	-0.782943	0.0655576	0.703737	0.118656	-0.75076	0.0854397	0.69051	0.128854	0.945686	0.00434487	-0.75318	0.0838617	-0.347085	0.500278	0.162874	0.757849
ENSDARG00000051876	ENSDARG00000051876	ush1c	brown	-0.416016	0.411976	0.269037	0.606182	-0.547667	0.260633	0.210299	0.689202	0.898632	0.0148924	-0.372849	0.466642	-0.2621	0.615853	-0.108731	0.837546
ENSDARG00000052155	ENSDARG00000052155	lrrc8ab	brown	-0.680089	0.137144	0.573898	0.233662	-0.724003	0.10375	0.550891	0.257256	0.97386	0.00101601	-0.609188	0.199256	-0.389315	0.445531	0.0377662	0.943378
ENSDARG00000052207	ENSDARG00000052207	c3a.3	brown	-0.803146	0.054313	0.741331	0.0917108	-0.714258	0.110807	0.602063	0.206024	0.960808	0.00227395	-0.787965	0.0626719	-0.256391	0.623841	0.0887723	0.867191
ENSDARG00000052271	ENSDARG00000052271	slc22a18	brown	-0.838249	0.0371291	0.705909	0.117017	-0.864518	0.0262897	0.64229	0.169049	0.967388	0.00157798	-0.609954	0.198534	-0.312276	0.546812	-0.0165869	0.975122
ENSDARG00000052462	ENSDARG00000052462	pisd	brown	-0.703089	0.119147	0.635514	0.175064	-0.700828	0.120868	0.321026	0.535004	0.974045	0.00100174	-0.441573	0.380691	-0.396206	0.436789	-0.35389	0.491325
ENSDARG00000052734	ENSDARG00000052734	hmgcra	brown	-0.505077	0.306808	0.423862	0.402282	-0.580487	0.227072	0.0644308	0.903488	0.86625	0.0256372	-0.160404	0.761458	-0.393662	0.440009	-0.562001	0.245751
ENSDARG00000052912	ENSDARG00000052912	si:dkey-57n24.6	brown	-0.655112	0.15791	0.570708	0.23688	-0.66362	0.150697	0.32398	0.531034	0.986514	0.000271564	-0.505846	0.305949	-0.335393	0.515775	-0.230635	0.660181
ENSDARG00000053027	ENSDARG00000053027	si:dkey-33i11.1	brown	-0.717495	0.10844	0.582946	0.224632	-0.74698	0.0879295	0.598256	0.209677	0.953862	0.00314403	-0.683615	0.134314	-0.242182	0.643829	0.147127	0.780901
ENSDARG00000053381	ENSDARG00000053381	plpp1a	brown	-0.837247	0.0375774	0.748571	0.0868778	-0.829713	0.0410274	0.477878	0.337749	0.961597	0.00218392	-0.477141	0.338602	-0.374868	0.464038	-0.307182	0.55372
ENSDARG00000054199	ENSDARG00000054199	mthfd2l	brown	-0.788793	0.0622015	0.799483	0.0562797	-0.659031	0.15457	0.429403	0.395484	0.956088	0.00285001	-0.630365	0.179693	-0.416977	0.410785	-0.250299	0.632392
ENSDARG00000055270	ENSDARG00000055270	si:ch1073-358c10.1	brown	-0.537088	0.271833	0.347297	0.5	-0.711078	0.113155	0.852609	0.0309853	0.564851	0.242833	-0.494899	0.318258	-0.257631	0.622103	0.543183	0.265358
ENSDARG00000055400	ENSDARG00000055400	si:dkey-56f14.7	brown	-0.74282	0.0907074	0.76198	0.0782377	-0.60464	0.203565	0.294734	0.570701	0.924927	0.00824231	-0.545291	0.263132	-0.375308	0.46347	-0.381697	0.45526
ENSDARG00000055620	ENSDARG00000055620	acad9	brown	-0.658916	0.154667	0.628376	0.181495	-0.599736	0.208254	0.317933	0.539169	0.980056	0.000592663	-0.575724	0.231828	-0.37077	0.469329	-0.225397	0.66763
ENSDARG00000055857	ENSDARG00000055857	dopey2	brown	-0.779036	0.0678433	0.71455	0.110593	-0.733351	0.0971731	0.653541	0.159257	0.960112	0.00235481	-0.746732	0.0880939	-0.368404	0.472394	0.111934	0.8328
ENSDARG00000055876	ENSDARG00000055876	msmo1	brown	-0.659129	0.154486	0.568545	0.239072	-0.669205	0.146039	0.331729	0.520659	0.987235	0.000243368	-0.515707	0.295017	-0.316379	0.541265	-0.213031	0.685287
ENSDARG00000055900	ENSDARG00000055900	zswim5	brown	-0.838611	0.036968	0.787176	0.0631214	-0.786388	0.0635714	0.625611	0.184012	0.975418	0.000898961	-0.666437	0.148339	-0.435413	0.388154	-0.0637193	0.90455
ENSDARG00000056619	ENSDARG00000056619	arhgap42a	brown	-0.851159	0.0315818	0.789207	0.0619677	-0.77252	0.0717351	0.508327	0.303184	0.975505	0.000892633	-0.641549	0.169702	-0.298572	0.565451	-0.173117	0.742919
ENSDARG00000056627	ENSDARG00000056627	cxcl14	brown	-0.723566	0.104062	0.682552	0.135165	-0.684284	0.13378	0.642112	0.169206	0.945402	0.00439009	-0.724567	0.103348	-0.456702	0.362575	0.116479	0.826072
ENSDARG00000056720	ENSDARG00000056720	utp3	brown	-0.69667	0.124059	0.716677	0.109036	-0.566361	0.241293	0.384128	0.452148	0.958301	0.00257191	-0.674896	0.141359	-0.404892	0.425851	-0.162201	0.758833
ENSDARG00000057353	ENSDARG00000057353	ehbp1l1a	brown	-0.568168	0.239455	0.39843	0.43398	-0.762084	0.0781725	0.717937	0.108119	0.777346	0.0688433	-0.42733	0.398022	-0.464015	0.353931	0.239355	0.647824
ENSDARG00000059558	ENSDARG00000059558	tecta	brown	-0.794278	0.0591289	0.711089	0.113147	-0.787356	0.0630188	0.572023	0.235552	0.992359	8.73536e-05	-0.616464	0.192441	-0.404884	0.425861	-0.0817084	0.87771
ENSDARG00000059714	ENSDARG00000059714	arsk	brown	-0.832045	0.0399445	0.750558	0.0855717	-0.832355	0.0398013	0.680362	0.136924	0.962758	0.00205457	-0.623986	0.185498	-0.460267	0.358352	-0.0219072	0.967144
ENSDARG00000060235	ENSDARG00000060235	mst1ra	brown	-0.380645	0.456608	0.225324	0.667733	-0.500392	0.31206	0.313574	0.545055	0.850916	0.0316824	-0.507327	0.304297	-0.175212	0.739872	0.159346	0.763005
ENSDARG00000060529	ENSDARG00000060529	nkx6.3	brown	-0.757018	0.0813872	0.720505	0.106259	-0.681812	0.135758	0.336752	0.513966	0.965264	0.00178897	-0.530275	0.279141	-0.343339	0.505228	-0.337379	0.513132
ENSDARG00000061093	ENSDARG00000061093	phldb1a	brown	-0.914488	0.0106557	0.834765	0.0386984	-0.873675	0.0229292	0.667805	0.147201	0.945557	0.00436535	-0.619144	0.189955	-0.379358	0.458261	-0.109199	0.836853
ENSDARG00000061120	ENSDARG00000061120	slc43a2b	brown	-0.556337	0.251591	0.487634	0.326526	-0.561498	0.246268	0.239454	0.647684	0.964543	0.00186356	-0.500367	0.312087	-0.325797	0.528596	-0.209593	0.690214
ENSDARG00000061798	ENSDARG00000061798	arhgap27l	brown	-0.84699	0.0333271	0.802232	0.0548009	-0.770424	0.0730077	0.508993	0.302444	0.974385	0.000975773	-0.609428	0.199029	-0.37771	0.460378	-0.217754	0.678531
ENSDARG00000061804	ENSDARG00000061804	si:ch211-194e15.5	brown	-0.863708	0.0265974	0.824081	0.0436992	-0.74932	0.0863841	0.45424	0.365502	0.942369	0.00488625	-0.610767	0.197769	-0.27792	0.593853	-0.263748	0.613552
ENSDARG00000062304	ENSDARG00000062304	pdpk1a	brown	-0.875645	0.0222347	0.843242	0.0349335	-0.796698	0.0577963	0.703599	0.11876	0.938002	0.00564648	-0.701926	0.12003	-0.458931	0.359933	-0.0130231	0.980466
ENSDARG00000062889	ENSDARG00000062889	fam78bb	brown	-0.659608	0.15408	0.583229	0.224351	-0.656666	0.156582	0.294807	0.570601	0.980716	0.000554225	-0.487581	0.326586	-0.332423	0.519733	-0.279793	0.591263
ENSDARG00000063255	ENSDARG00000063255	btbd11a	brown	-0.553132	0.254919	0.345914	0.501824	-0.732985	0.0974269	0.683863	0.134116	0.775402	0.0700015	-0.516567	0.294071	-0.245037	0.639801	0.356846	0.487451
ENSDARG00000063438	ENSDARG00000063438	srebf2	brown	-0.905797	0.0128934	0.823308	0.0440719	-0.855066	0.0299865	0.694982	0.125365	0.948046	0.00397875	-0.684989	0.133218	-0.339046	0.510918	-0.0153939	0.976911
ENSDARG00000063711	ENSDARG00000063711	trim3a	brown	-0.663398	0.150883	0.570429	0.237162	-0.677794	0.139	0.388421	0.446669	0.992345	8.76655e-05	-0.556807	0.251104	-0.331565	0.520878	-0.135992	0.797269
ENSDARG00000067711	ENSDARG00000067711	parvg	brown	-0.89558	0.015786	0.792003	0.0603949	-0.890451	0.0173441	0.64552	0.166213	0.952884	0.00327759	-0.573201	0.234364	-0.369502	0.470971	-0.129458	0.806898
ENSDARG00000067805	ENSDARG00000067805	ggcx	brown	-0.896813	0.0154221	0.788598	0.0623123	-0.872462	0.0233615	0.801759	0.055054	0.895809	0.015718	-0.72015	0.106516	-0.300698	0.562547	0.1538	0.771118
ENSDARG00000068128	ENSDARG00000068128	ppp1r15b	brown	-0.68972	0.129475	0.611772	0.196824	-0.689649	0.12953	0.451092	0.369257	0.995727	2.73436e-05	-0.597485	0.210421	-0.378754	0.459036	-0.0940255	0.859377
ENSDARG00000068220	ENSDARG00000068220	hbl3	brown	-0.443148	0.37879	0.400715	0.4311	-0.484308	0.330336	0.119808	0.821148	0.91122	0.011473	-0.331148	0.521434	-0.455796	0.363652	-0.357237	0.486939
ENSDARG00000068369	ENSDARG00000068369	angptl2b	brown	-0.882804	0.0197974	0.846417	0.0335702	-0.786926	0.063264	0.678991	0.138031	0.945997	0.00429571	-0.731819	0.0982378	-0.393599	0.44009	-0.00764657	0.98853
ENSDARG00000068551	ENSDARG00000068551	elovl8a	brown	-0.874232	0.0227318	0.829476	0.0411386	-0.779457	0.0675954	0.500603	0.311822	0.953981	0.0031279	-0.605763	0.202498	-0.329509	0.523624	-0.244797	0.640139
ENSDARG00000068876	ENSDARG00000068876	zgc:153031	brown	-0.492867	0.320563	0.285531	0.583343	-0.6668	0.148037	0.411871	0.417127	0.871433	0.0237317	-0.438693	0.384174	-0.183792	0.727417	0.10261	0.846626
ENSDARG00000069370	ENSDARG00000069370	AL845424.1	brown	-0.578561	0.22899	0.60559	0.202661	-0.479663	0.335685	0.318464	0.538454	0.939813	0.00532468	-0.631651	0.178533	-0.454448	0.365255	-0.138021	0.794283
ENSDARG00000069734	ENSDARG00000069734	hbba2	brown	-0.588224	0.219429	0.535432	0.273603	-0.55622	0.251712	0.195042	0.711146	0.956547	0.0027912	-0.49287	0.32056	-0.291724	0.574827	-0.292955	0.573139
ENSDARG00000069735	ENSDARG00000069735	hbaa2	brown	-0.48709	0.327148	0.415422	0.412712	-0.502302	0.309915	0.147973	0.77966	0.935614	0.00608495	-0.449898	0.370685	-0.284897	0.584216	-0.242726	0.643061
ENSDARG00000071553	ENSDARG00000071553	zgc:171500	brown	-0.38442	0.451774	0.136113	0.797091	-0.670683	0.144817	0.701771	0.120148	0.504208	0.30778	-0.282545	0.587461	-0.21446	0.683242	0.462525	0.355686
ENSDARG00000071592	ENSDARG00000071592	aqp8a.2	brown	-0.616375	0.192524	0.48007	0.335215	-0.692028	0.127665	0.348052	0.499004	0.971389	0.00121618	-0.468903	0.348195	-0.286254	0.582347	-0.150364	0.776153
ENSDARG00000073696	ENSDARG00000073696	frmd8	brown	-0.797751	0.0572208	0.833895	0.0390949	-0.625841	0.183802	0.444377	0.37731	0.9303	0.00711786	-0.680088	0.137145	-0.403008	0.428215	-0.215974	0.681076
ENSDARG00000074425	ENSDARG00000074425	si:busm1-57f23.1	brown	0.688888	0.13013	-0.633004	0.177314	0.769614	0.0735025	-0.471912	0.34468	-0.891654	0.0169723	0.27858	0.59294	0.68358	0.134343	0.367826	0.473143
ENSDARG00000074819	ENSDARG00000074819	si:dkeyp-23e4.3	brown	0.17421	0.741328	-0.0156235	0.976567	0.349589	0.496979	-0.352344	0.493355	-0.648015	0.164036	0.453276	0.366651	0.167332	0.751345	-0.421885	0.404717
ENSDARG00000075133	ENSDARG00000075133	adgrb1a	brown	-0.452658	0.367387	0.327565	0.526226	-0.562482	0.245258	0.183694	0.727558	0.919239	0.00952004	-0.347014	0.500372	-0.313549	0.54509	-0.220175	0.675074
ENSDARG00000075437	ENSDARG00000075437	shc1	brown	-0.820343	0.0455156	0.824182	0.0436506	-0.649314	0.162908	0.435337	0.388247	0.934553	0.00628486	-0.707215	0.116035	-0.274936	0.597987	-0.185068	0.725567
ENSDARG00000075444	ENSDARG00000075444	cgref1	brown	-0.494609	0.318587	0.380662	0.456587	-0.573826	0.233735	0.219154	0.676532	0.94104	0.00511191	-0.412465	0.416388	-0.305168	0.556458	-0.192328	0.715065
ENSDARG00000075626	ENSDARG00000075626	zgc:172090	brown	-0.755652	0.0822641	0.719902	0.106695	-0.700904	0.120809	0.317123	0.540262	0.944267	0.00457276	-0.442205	0.379928	-0.396467	0.436459	-0.427756	0.397501
ENSDARG00000076294	ENSDARG00000076294	klb	brown	-0.695528	0.124942	0.525536	0.28427	-0.813947	0.0487033	0.714807	0.110405	0.882153	0.0200134	-0.575996	0.231555	-0.334671	0.516736	0.215546	0.681688
ENSDARG00000076773	ENSDARG00000076773	lrrc58a	brown	-0.500267	0.3122	0.26544	0.611191	-0.739834	0.0927244	0.783171	0.0654254	0.563357	0.244362	-0.378337	0.459572	-0.223924	0.669728	0.463823	0.354158
ENSDARG00000077174	ENSDARG00000077174	qsox2	brown	-0.715909	0.109597	0.709992	0.113961	-0.60569	0.202567	0.319881	0.536544	0.96304	0.00202386	-0.595912	0.21194	-0.350866	0.495298	-0.278006	0.593735
ENSDARG00000077504	ENSDARG00000077504	si:ch211-103n10.5	brown	-0.49868	0.313986	0.393438	0.440294	-0.55803	0.24984	0.190466	0.717756	0.940983	0.00512174	-0.420859	0.405984	-0.282063	0.588126	-0.217961	0.678236
ENSDARG00000077855	ENSDARG00000077855	znrf2a	brown	-0.847559	0.0330863	0.887029	0.0184226	-0.681446	0.136052	0.53507	0.27399	0.910643	0.0116202	-0.668646	0.146502	-0.467355	0.350008	-0.20479	0.697109
ENSDARG00000078178	ENSDARG00000078178	art4	brown	-0.706082	0.116886	0.573449	0.234114	-0.782267	0.0659505	0.629967	0.180053	0.950162	0.00366381	-0.592136	0.215605	-0.386567	0.449033	0.0914219	0.863249
ENSDARG00000078179	ENSDARG00000078179	fndc3ba	brown	-0.810121	0.0506583	0.794275	0.0591309	-0.673337	0.142634	0.464908	0.352881	0.96266	0.00206538	-0.709743	0.114147	-0.298278	0.565852	-0.142464	0.787749
ENSDARG00000078778	ENSDARG00000078778	lrch1	brown	-0.746762	0.088074	0.630824	0.179279	-0.762082	0.0781737	0.586975	0.220656	0.977106	0.000780224	-0.666252	0.148494	-0.301606	0.561309	0.0643852	0.903556
ENSDARG00000078781	ENSDARG00000078781	si:ch211-161c3.6	brown	-0.814217	0.0485666	0.803057	0.0543606	-0.701497	0.120357	0.530906	0.278462	0.970851	0.00126212	-0.696299	0.124345	-0.404959	0.425766	-0.120463	0.820179
ENSDARG00000078918	ENSDARG00000078918	comtd1	brown	-0.732728	0.0976054	0.688066	0.130778	-0.664447	0.150002	0.600597	0.207427	0.955864	0.00287896	-0.771324	0.07246	-0.356302	0.488164	0.122774	0.816765
ENSDARG00000079078	ENSDARG00000079078	HBZ (1 of many)	brown	-0.495318	0.317784	0.425136	0.400715	-0.518836	0.291579	0.188748	0.72024	0.944859	0.00447697	-0.45893	0.359934	-0.329393	0.52378	-0.217999	0.678182
ENSDARG00000079286	ENSDARG00000079286	bcr	brown	-0.675531	0.14084	0.590159	0.217534	-0.684271	0.133791	0.374395	0.464647	0.993511	6.30238e-05	-0.534436	0.274669	-0.352134	0.493632	-0.188058	0.721238
ENSDARG00000079317	ENSDARG00000079317	dlc1	brown	-0.750443	0.085647	0.715362	0.109998	-0.666739	0.148088	0.355843	0.488765	0.97538	0.000901726	-0.581772	0.225795	-0.327691	0.526058	-0.273083	0.600558
ENSDARG00000079762	ENSDARG00000079762	si:dkey-253d23.4	brown	-0.858255	0.0287134	0.749844	0.0860399	-0.870453	0.0240866	0.619981	0.189182	0.970353	0.00130535	-0.566909	0.240735	-0.382613	0.454087	-0.120446	0.820205
ENSDARG00000079912	ENSDARG00000079912	rapgefl1	brown	-0.74483	0.0893603	0.699681	0.121744	-0.689322	0.129787	0.421826	0.40479	0.993235	6.84893e-05	-0.601545	0.206519	-0.380269	0.457091	-0.197845	0.707105
ENSDARG00000087099	ENSDARG00000087099	si:ch73-106k19.5	brown	-0.805012	0.0533239	0.824153	0.0436646	-0.690642	0.12875	0.436522	0.386807	0.930299	0.00711806	-0.542762	0.265803	-0.500225	0.312247	-0.343995	0.50436
ENSDARG00000087306	ENSDARG00000087306	CABZ01038521.1	brown	-0.830008	0.04089	0.753157	0.0838768	-0.798612	0.0567519	0.592824	0.214935	0.987373	0.000238142	-0.646682	0.165198	-0.379698	0.457823	-0.076228	0.885879
ENSDARG00000087954	ENSDARG00000087954	rac1b	brown	-0.6449	0.166755	0.528267	0.28131	-0.635346	0.175214	0.269223	0.605922	0.953556	0.00318542	-0.54873	0.259517	-0.116855	0.825516	-0.170175	0.747202
ENSDARG00000089087	ENSDARG00000089087	hbba1	brown	-0.513926	0.29698	0.432052	0.392247	-0.548611	0.259642	0.181136	0.731267	0.946773	0.00417426	-0.425454	0.400325	-0.319446	0.53713	-0.262191	0.615725
ENSDARG00000089432	ENSDARG00000089432	si:ch211-212k18.15	brown	-0.872283	0.0234258	0.771274	0.0724902	-0.854793	0.0300968	0.642993	0.16843	0.970011	0.00133553	-0.637551	0.173247	-0.338039	0.512256	-0.0563786	0.915522
ENSDARG00000090638	ENSDARG00000090638	gp9	brown	-0.672931	0.142968	0.54901	0.259224	-0.715622	0.109808	0.430997	0.393536	0.986413	0.000275676	-0.558493	0.249361	-0.289029	0.578529	-0.0773226	0.884247
ENSDARG00000091131	ENSDARG00000091131	cry1bb	brown	-0.7815	0.0663974	0.775331	0.0700438	-0.685345	0.132935	0.601406	0.206652	0.957421	0.00268086	-0.727587	0.101205	-0.467016	0.350405	-0.00762278	0.988566
ENSDARG00000091293	ENSDARG00000091293	dmxl2	brown	-0.649477	0.162766	0.541689	0.26694	-0.679199	0.137863	0.33178	0.520591	0.983426	0.000409763	-0.501206	0.311144	-0.293036	0.573028	-0.197884	0.707049
ENSDARG00000092029	ENSDARG00000092029	si:ch211-199m3.1	brown	-0.761123	0.0787776	0.676705	0.139884	-0.752401	0.0843686	0.42314	0.403171	0.992424	8.58752e-05	-0.530307	0.279107	-0.353926	0.491278	-0.239549	0.64755
ENSDARG00000092042	ENSDARG00000092042	AL935153.1	brown	-0.793002	0.0598375	0.694846	0.125471	-0.793982	0.0592928	0.518479	0.291971	0.995216	3.42697e-05	-0.579672	0.227883	-0.354178	0.490947	-0.140024	0.791336
ENSDARG00000092044	ENSDARG00000092044	si:dkey-22f5.9	brown	-0.759587	0.0797497	0.638678	0.172244	-0.799999	0.0560005	0.599242	0.208729	0.979353	0.000635023	-0.607146	0.201186	-0.362642	0.479882	0.00779027	0.988315
ENSDARG00000092154	ENSDARG00000092154	tex264a	brown	-0.855758	0.0297079	0.869242	0.0245287	-0.708473	0.115094	0.48145	0.333623	0.924616	0.00831001	-0.621264	0.187999	-0.408623	0.421179	-0.275491	0.597218
ENSDARG00000092578	ENSDARG00000092578	si:ch211-222e20.4	brown	-0.820515	0.0454312	0.839929	0.0363835	-0.663138	0.151101	0.457548	0.361572	0.938528	0.00555205	-0.665182	0.149387	-0.388289	0.446838	-0.228439	0.663302
ENSDARG00000093186	ENSDARG00000093186	si:dkey-30j10.5	brown	-0.627923	0.181907	0.499776	0.312752	-0.698238	0.122851	0.387182	0.448248	0.97797	0.000722611	-0.495348	0.31775	-0.320288	0.535996	-0.119054	0.822263
ENSDARG00000094169	ENSDARG00000094169	AL807389.1	brown	0.87634	0.0219921	-0.740282	0.092421	0.883924	0.0194284	-0.488551	0.325478	-0.903789	0.0134394	0.443254	0.378663	0.214396	0.683333	0.294846	0.570547
ENSDARG00000094324	ENSDARG00000094324	efemp2a	brown	-0.866991	0.0253606	0.765138	0.0762629	-0.839147	0.0367296	0.536858	0.272078	0.969197	0.00140858	-0.58026	0.227297	-0.28375	0.585798	-0.182122	0.729838
ENSDARG00000094491	ENSDARG00000094491	si:ch211-202m22.1	brown	-0.572879	0.234688	0.414434	0.41394	-0.688271	0.130617	0.515787	0.294928	0.918782	0.00962656	-0.550516	0.257647	-0.29604	0.568913	0.137239	0.795433
ENSDARG00000094730	ENSDARG00000094730	acbd7	brown	-0.790066	0.061482	0.772025	0.0720349	-0.698666	0.122522	0.353618	0.491682	0.94	0.00529192	-0.500045	0.312449	-0.387349	0.448036	-0.395299	0.437937
ENSDARG00000095280	ENSDARG00000095280	CU682811.2	brown	-0.522973	0.287057	0.321468	0.534408	-0.721086	0.105841	0.798322	0.0569093	0.625113	0.184467	-0.467833	0.349447	-0.280631	0.590104	0.478282	0.337282
ENSDARG00000095786	ENSDARG00000095786	AL928685.3	brown	-0.500781	0.311621	0.296464	0.568333	-0.699764	0.121681	0.667555	0.147409	0.746833	0.0880271	-0.478639	0.336869	-0.277085	0.595009	0.367388	0.473712
ENSDARG00000095909	ENSDARG00000095909	BX539325.1	brown	-0.825438	0.0430481	0.775958	0.0696696	-0.777471	0.0687688	0.563008	0.244718	0.983969	0.000383406	-0.618456	0.190592	-0.442617	0.379431	-0.148506	0.778878
ENSDARG00000096502	ENSDARG00000096502	BX088688.1	brown	-0.736157	0.0952359	0.612657	0.195994	-0.789523	0.0617889	0.481545	0.333514	0.989337	0.00016995	-0.508646	0.30283	-0.362067	0.480632	-0.15169	0.774211
ENSDARG00000096672	ENSDARG00000096672	BX296562.1	brown	-0.597532	0.210375	0.481753	0.333274	-0.693034	0.12688	0.260259	0.618426	0.943233	0.00474221	-0.301244	0.561803	-0.402318	0.429082	-0.368485	0.472289
ENSDARG00000096803	ENSDARG00000096803	CU660013.4	brown	-0.540933	0.267741	0.340928	0.508421	-0.715473	0.109916	0.611501	0.197079	0.825125	0.0431981	-0.508171	0.303358	-0.25891	0.620313	0.279542	0.591609
ENSDARG00000097206	ENSDARG00000097206	BX324206.1	brown	-0.728135	0.100819	0.770118	0.0731942	-0.538333	0.270505	0.415786	0.412261	0.924112	0.00842003	-0.760994	0.0788593	-0.335584	0.51552	-0.0947827	0.858252
ENSDARG00000097446	ENSDARG00000097446	si:ch211-66i15.5	brown	-0.379657	0.457876	0.250844	0.631626	-0.491935	0.321622	0.111427	0.833551	0.885144	0.0190304	-0.334471	0.517002	-0.246655	0.63752	-0.19601	0.70975
ENSDARG00000098108	ENSDARG00000098108	dusp2	brown	-0.695725	0.124789	0.617736	0.19126	-0.701636	0.120251	0.348032	0.499029	0.986531	0.000270906	-0.479323	0.336078	-0.379421	0.45818	-0.28488	0.58424
ENSDARG00000098244	ENSDARG00000098244	CR388206.1	brown	-0.385773	0.450046	0.253962	0.627247	-0.501224	0.311124	0.127185	0.810251	0.888117	0.0180763	-0.340864	0.508507	-0.249334	0.633749	-0.182379	0.729465
ENSDARG00000098377	ENSDARG00000098377	tnfrsf11b	brown	-0.667922	0.147103	0.511175	0.300022	-0.721804	0.105325	0.406548	0.423776	0.964116	0.00190837	-0.553645	0.254385	-0.16482	0.755009	-0.0503511	0.924537
ENSDARG00000098663	ENSDARG00000098663	fgf19	brown	-0.41428	0.414132	0.29468	0.570774	-0.503021	0.309109	0.101283	0.848595	0.898405	0.014958	-0.346196	0.501452	-0.236973	0.651194	-0.240516	0.646183
ENSDARG00000098764	ENSDARG00000098764	musk	brown	-0.86542	0.025949	0.761196	0.0787318	-0.863748	0.0265821	0.677574	0.139178	0.963245	0.00200154	-0.632706	0.177582	-0.370722	0.469391	-0.0233453	0.964988
ENSDARG00000099555	ENSDARG00000099555	foxo1a	brown	-0.535811	0.273198	0.358112	0.485795	-0.762029	0.0782069	0.820653	0.0453635	0.586815	0.220813	-0.325636	0.528811	-0.465462	0.35223	0.334591	0.516843
ENSDARG00000099722	ENSDARG00000099722	zgc:153993	brown	-0.737553	0.0942794	0.760186	0.0793701	-0.596812	0.21107	0.295055	0.570261	0.925788	0.00805668	-0.552423	0.255658	-0.380746	0.456479	-0.373555	0.465731
ENSDARG00000099825	ENSDARG00000099825	si:dkey-16p6.1	brown	-0.632209	0.17803	0.48256	0.332345	-0.75521	0.0825487	0.506649	0.305053	0.951525	0.00346772	-0.47048	0.346351	-0.394497	0.438952	-0.0272655	0.959112
ENSDARG00000099960	ENSDARG00000099960	elovl1a	brown	-0.868808	0.024688	0.88481	0.019139	-0.723217	0.104311	0.541652	0.266979	0.924347	0.00836846	-0.650105	0.162222	-0.440677	0.381773	-0.219212	0.67645
ENSDARG00000099968	ENSDARG00000099968	BX322612.1	brown	-0.624437	0.185086	0.643035	0.168393	-0.554387	0.253614	0.158182	0.764705	0.884827	0.0191334	-0.339823	0.509886	-0.481311	0.333783	-0.548759	0.259488
ENSDARG00000100431	ENSDARG00000100431	spaca4l	brown	0.512723	0.298309	-0.276023	0.59648	0.597937	0.209984	-0.317206	0.540149	-0.763973	0.0769889	0.539195	0.269588	-0.245617	0.638983	-0.190133	0.718237
ENSDARG00000100599	ENSDARG00000100599	c1s	brown	-0.919796	0.00939109	0.895515	0.0158054	-0.77001	0.0732606	0.565191	0.242486	0.911429	0.0114199	-0.689419	0.129712	-0.276387	0.595977	-0.164426	0.755584
ENSDARG00000100865	ENSDARG00000100865	si:dkey-269o24.1	brown	-0.381482	0.455536	0.252569	0.629202	-0.491014	0.322669	0.109097	0.837004	0.885453	0.01893	-0.338285	0.511929	-0.238737	0.648697	-0.19575	0.710126
ENSDARG00000100986	ENSDARG00000100986	INHBE	brown	-0.776289	0.0694718	0.699512	0.121874	-0.768149	0.074401	0.458776	0.360117	0.992053	9.44715e-05	-0.52954	0.279935	-0.40213	0.429319	-0.237183	0.650896
ENSDARG00000101169	ENSDARG00000101169	grap2b	brown	-0.588221	0.219432	0.596521	0.211351	-0.528973	0.280547	0.199156	0.705216	0.934431	0.00630802	-0.442368	0.379731	-0.472744	0.343709	-0.394912	0.438426
ENSDARG00000101507	ENSDARG00000101507	ATG2A	brown	-0.593589	0.214192	0.649094	0.163098	-0.385364	0.450569	0.354885	0.49002	0.864573	0.0262689	-0.827473	0.0420809	-0.246774	0.637353	0.0657478	0.90152
ENSDARG00000101561	ENSDARG00000101561	dbt	brown	0.209881	0.689801	-0.140744	0.790277	0.380505	0.456788	0.239041	0.648268	-0.491215	0.32244	-0.364994	0.476821	0.416738	0.41108	0.86242	0.0270904
ENSDARG00000101814	ENSDARG00000101814	lpar3	brown	-0.885108	0.0190418	0.835687	0.03828	-0.825993	0.0427835	0.561774	0.245985	0.949508	0.00375983	-0.556708	0.251206	-0.427908	0.397314	-0.252051	0.629929
ENSDARG00000102097	ENSDARG00000102097	nfkbiz	brown	-0.710038	0.113927	0.669284	0.145974	-0.645769	0.165995	0.465317	0.3524	0.987027	0.000251367	-0.686072	0.132357	-0.362002	0.480717	-0.0530901	0.92044
ENSDARG00000102153	ENSDARG00000102153	nrp1a	brown	-0.589859	0.217827	0.535588	0.273436	-0.568466	0.239152	0.20155	0.701769	0.959024	0.00248409	-0.473099	0.343296	-0.319129	0.537557	-0.30854	0.551875
ENSDARG00000102716	ENSDARG00000102716	AL645691.3	brown	-0.7181	0.108	0.639562	0.17146	-0.705565	0.117275	0.294383	0.571181	0.962898	0.00203926	-0.44088	0.381529	-0.317373	0.539925	-0.371683	0.468149
ENSDARG00000102894	ENSDARG00000102894	CABZ01057159.1	brown	-0.407921	0.422057	0.301061	0.562052	-0.495662	0.317394	0.141335	0.789409	0.906721	0.0126456	-0.373924	0.465255	-0.295871	0.569143	-0.195768	0.710099
ENSDARG00000103103	ENSDARG00000103103	BX957361.2	brown	-0.391627	0.442592	0.265001	0.611803	-0.49886	0.313784	0.116385	0.826211	0.891102	0.0171425	-0.340445	0.509061	-0.249855	0.633017	-0.202958	0.699743
ENSDARG00000103129	ENSDARG00000103129	nid1b	brown	-0.775979	0.0696569	0.721243	0.105728	-0.723984	0.103763	0.43507	0.388571	0.991364	0.000111556	-0.586428	0.221194	-0.365282	0.476446	-0.221833	0.672708
ENSDARG00000103158	ENSDARG00000103158	LDB1 (1 of many)	brown	-0.0198381	0.970247	-0.0372125	0.944207	-0.0219519	0.967077	-0.0836455	0.874824	0.605467	0.202779	-0.487031	0.327215	0.0573639	0.914049	0.198685	0.705894
ENSDARG00000103747	ENSDARG00000103747	cav1	brown	-0.781204	0.0665705	0.775313	0.0700548	-0.639784	0.171263	0.363773	0.478409	0.947604	0.00404602	-0.635731	0.17487	-0.293017	0.573053	-0.26373	0.613576
ENSDARG00000103915	ENSDARG00000103915	ero1b	brown	-0.604396	0.203797	0.520466	0.289794	-0.622861	0.18653	0.323585	0.531564	0.981053	0.000535072	-0.527106	0.282566	-0.340448	0.509058	-0.159859	0.762254
ENSDARG00000104083	ENSDARG00000104083	adgre5b.2	brown	-0.624245	0.185261	0.493942	0.319343	-0.704819	0.117838	0.448241	0.372669	0.971464	0.00120985	-0.523057	0.286966	-0.347167	0.50017	-0.0396065	0.940621
ENSDARG00000104301	ENSDARG00000104301	zgc:193726	brown	-0.442248	0.379877	0.233297	0.656403	-0.684345	0.133731	0.479642	0.335709	0.807921	0.0517981	-0.320793	0.535317	-0.344014	0.504335	0.11382	0.830007
ENSDARG00000104328	ENSDARG00000104328	si:ch211-276i6.1	brown	-0.407595	0.422465	0.287938	0.580029	-0.504927	0.306975	0.11846	0.823142	0.899522	0.0146364	-0.346112	0.501563	-0.261931	0.616089	-0.222253	0.672109
ENSDARG00000104400	ENSDARG00000104400	socs3a	brown	-0.835197	0.038502	0.720667	0.106143	-0.857715	0.0289274	0.747344	0.0876885	0.933774	0.00643358	-0.654899	0.158093	-0.384288	0.451943	0.100858	0.849226
ENSDARG00000104491	ENSDARG00000104491	ampd2a	brown	-0.811388	0.0500066	0.732285	0.097913	-0.799072	0.0565019	0.700725	0.120946	0.955306	0.00295169	-0.686645	0.131902	-0.424497	0.401502	0.0740799	0.889083
ENSDARG00000104701	ENSDARG00000104701	map7d1b	brown	-0.852654	0.0309667	0.795142	0.0586516	-0.801477	0.0552052	0.549532	0.258677	0.977434	0.000758111	-0.595899	0.211952	-0.406922	0.423307	-0.194864	0.711403
ENSDARG00000104773	ENSDARG00000104773	junbb	brown	-0.781424	0.0664418	0.639274	0.171716	-0.840561	0.0361045	0.701245	0.12055	0.938601	0.00553908	-0.627361	0.182418	-0.339144	0.510788	0.119842	0.821097
ENSDARG00000104808	ENSDARG00000104808	jak2a	brown	-0.832736	0.0396261	0.791491	0.0606817	-0.708791	0.114856	0.383974	0.452345	0.930689	0.00703962	-0.601903	0.206176	-0.212583	0.685929	-0.286565	0.581918
ENSDARG00000104848	ENSDARG00000104848	cdkal1	brown	0.387319	0.448074	-0.111253	0.833809	0.707028	0.116176	-0.708653	0.11496	-0.372351	0.467286	0.140485	0.790659	0.152482	0.77305	-0.412052	0.416902
ENSDARG00000104899	ENSDARG00000104899	CR931813.2	brown	-0.719504	0.106983	0.621058	0.188188	-0.745548	0.0888812	0.587653	0.21999	0.976518	0.000820639	-0.635271	0.175282	-0.396517	0.436396	0.042435	0.936386
ENSDARG00000105265	ENSDARG00000105265	zgc:171534	brown	-0.792312	0.060222	0.7157	0.10975	-0.76408	0.0769221	0.454713	0.36494	0.991253	0.000114437	-0.561779	0.245979	-0.35053	0.49574	-0.223935	0.669713
ENSDARG00000105408	ENSDARG00000105408	BX248082.1	brown	-0.431968	0.39235	0.309389	0.550723	-0.527376	0.282275	0.152935	0.772386	0.911427	0.0114204	-0.369982	0.47035	-0.264629	0.612323	-0.199515	0.704698
ENSDARG00000105503	ENSDARG00000105503	fndc3a	brown	-0.896662	0.0154663	0.871117	0.0238457	-0.787394	0.0629969	0.548111	0.260166	0.936364	0.0059455	-0.613311	0.195382	-0.384019	0.452287	-0.237796	0.65003
ENSDARG00000105526	ENSDARG00000105526	CR318601.1	brown	-0.693244	0.126716	0.619035	0.190056	-0.702974	0.119234	0.395478	0.437709	0.993458	6.40658e-05	-0.511361	0.299816	-0.415924	0.412089	-0.224188	0.669352
ENSDARG00000105619	ENSDARG00000105619	si:ch73-211e3.1	brown	-0.704972	0.117723	0.658433	0.155077	-0.657805	0.155611	0.353117	0.49234	0.987891	0.000219053	-0.56035	0.247448	-0.36658	0.474761	-0.245407	0.639279
ENSDARG00000009466	ENSDARG00000009466	rgs9bp	green	-0.111135	0.833984	-0.0196773	0.970488	0.0162502	0.975627	-0.0237337	0.964406	-0.138002	0.794311	-0.32501	0.52965	0.941367	0.00505595	0.390649	0.443835
ENSDARG00000017591	ENSDARG00000017591	fat1a	green	-0.404214	0.426701	0.3286	0.524841	-0.200521	0.70325	-0.107447	0.83945	0.283104	0.586689	-0.386106	0.44962	0.663758	0.15058	-0.128265	0.808658
ENSDARG00000018441	ENSDARG00000018441	heg1	green	-0.0289482	0.95659	-0.0293016	0.95606	0.105414	0.842464	0.104711	0.843508	-0.510781	0.300459	-0.113267	0.830826	0.780172	0.067175	0.436439	0.386907
ENSDARG00000020046	ENSDARG00000020046	ahr1a	green	0.538691	0.270125	-0.546321	0.262047	0.65391	0.15894	-0.569091	0.238518	-0.508576	0.302908	0.00890425	0.986644	0.886016	0.0187479	0.321708	0.534086
ENSDARG00000020085	ENSDARG00000020085	slc33a1	green	0.0188755	0.97169	-0.310777	0.548843	-0.141903	0.788574	-0.0669694	0.899696	-0.0104397	0.984341	-0.0461714	0.930792	0.828128	0.0417715	0.330669	0.522074
ENSDARG00000030278	ENSDARG00000030278	idh3a	green	0.0181195	0.972824	0.0611623	0.908371	0.358134	0.485766	-0.276054	0.596437	-0.215686	0.681487	-0.373533	0.465759	0.775569	0.0699014	0.188936	0.719968
ENSDARG00000037062	ENSDARG00000037062	dhh	green	0.34799	0.499085	-0.414061	0.414404	0.443493	0.378375	-0.422952	0.403402	-0.531362	0.27797	0.0502409	0.924702	0.974891	0.000937744	0.275979	0.596541
ENSDARG00000037932	ENSDARG00000037932	lin7b	green	0.414752	0.413545	-0.479724	0.335615	0.486786	0.327496	-0.624984	0.184585	-0.289287	0.578174	0.024872	0.9627	0.890131	0.0174436	0.115481	0.827548
ENSDARG00000041068	ENSDARG00000041068	got2a	green	0.193378	0.713548	-0.285959	0.582753	0.271478	0.602787	0.0312329	0.953166	-0.25922	0.619879	-0.396185	0.436816	0.8054	0.053119	0.801662	0.0551056
ENSDARG00000045015	ENSDARG00000045015	cyp27b1	green	0.564386	0.243308	-0.654353	0.15856	0.552414	0.255667	-0.616812	0.192117	-0.585974	0.221641	0.276723	0.595511	0.916558	0.0101533	0.172181	0.744281
ENSDARG00000055786	ENSDARG00000055786	prss23	green	-0.278725	0.592739	-0.00672505	0.989913	-0.413191	0.415485	-0.0239283	0.964114	0.41094	0.418288	-0.165517	0.753992	0.59385	0.213938	0.00713831	0.989293
ENSDARG00000058218	ENSDARG00000058218	fam151a	green	0.42534	0.400465	-0.533355	0.275828	0.450392	0.370094	-0.459933	0.358748	-0.449206	0.371513	0.0479278	0.928163	0.968771	0.00144769	0.335635	0.515452
ENSDARG00000062058	ENSDARG00000062058	slc12a7b	green	0.0384933	0.942289	-0.090136	0.865162	0.177358	0.736753	0.235665	0.653047	-0.354805	0.490124	-0.42164	0.40502	0.726815	0.101751	0.82196	0.0447254
ENSDARG00000068214	ENSDARG00000068214	ccni	green	-0.0712675	0.89328	0.284363	0.584953	0.15865	0.764022	-0.068818	0.896936	0.508148	0.303383	-0.504257	0.307724	-0.439089	0.383694	-0.0701146	0.895
ENSDARG00000069440	ENSDARG00000069440	dachd	green	0.344587	0.503578	-0.4526	0.367457	0.382743	0.453919	-0.564709	0.242978	-0.283963	0.585505	0.0560337	0.916037	0.933392	0.00650716	0.104989	0.843095
ENSDARG00000074301	ENSDARG00000074301	cth	green	-0.094752	0.858297	-0.137913	0.794443	-0.241903	0.644223	0.492899	0.320526	0.0381421	0.942815	-0.377729	0.460354	0.447404	0.373672	0.863198	0.026792
ENSDARG00000076624	ENSDARG00000076624	ptprb	green	0.321196	0.534774	-0.494886	0.318273	0.276508	0.595808	-0.397875	0.43468	-0.174778	0.740502	-0.0465554	0.930217	0.904235	0.0133174	0.32614	0.528135
ENSDARG00000077882	ENSDARG00000077882	wisp2	green	0.393527	0.440181	-0.477192	0.338543	0.460733	0.357802	-0.492336	0.321166	-0.433536	0.390438	0.0278737	0.9582	0.971221	0.00123044	0.26874	0.606595
ENSDARG00000078014	ENSDARG00000078014	pacsin2	green	0.238301	0.649315	0.0696872	0.895638	0.479283	0.336124	-0.19588	0.709938	0.0734277	0.890056	-0.233417	0.656232	-0.514863	0.295947	-0.0453599	0.932007
ENSDARG00000078770	ENSDARG00000078770	GNPAT (1 of many)	green	0.508097	0.30344	-0.584471	0.223123	0.536422	0.272545	-0.644051	0.167501	-0.486795	0.327486	0.197007	0.708312	0.921713	0.00895349	0.119656	0.821372
ENSDARG00000088984	ENSDARG00000088984	cep131	green	0.441951	0.380235	-0.411248	0.417905	0.618381	0.190661	-0.300498	0.56282	-0.559598	0.248222	-0.174308	0.741186	0.823851	0.0438097	0.58116	0.226402
ENSDARG00000089221	ENSDARG00000089221	si:ch211-195o20.7	green	-0.146771	0.781425	-0.0278907	0.958175	-0.0794772	0.881035	-0.1147	0.828704	-0.0372987	0.944078	-0.207893	0.692654	0.922343	0.00881164	0.181274	0.731068
ENSDARG00000089645	ENSDARG00000089645	si:ch1073-406l10.2	green	-0.312892	0.545979	0.32487	0.529838	-0.419242	0.407981	-0.0601106	0.909943	0.552133	0.25596	0.244185	0.641002	-0.680832	0.136545	-0.827255	0.0421837
ENSDARG00000089651	ENSDARG00000089651	CR936465.1	green	0.182813	0.728835	-0.305321	0.55625	0.253782	0.627499	-0.364433	0.477551	-0.311447	0.547934	-0.0374059	0.943917	0.991179	0.000116369	0.21209	0.686635
ENSDARG00000090690	ENSDARG00000090690	nell2a	green	-0.0490111	0.926542	-0.0977543	0.853836	-0.0467492	0.929927	-0.0697135	0.895599	-0.442103	0.380051	0.196989	0.708338	0.775897	0.0697057	0.0553441	0.917069
ENSDARG00000091087	ENSDARG00000091087	BX530067.1	green	0.266424	0.609819	-0.384896	0.451167	0.274238	0.598955	-0.542078	0.266527	-0.427481	0.397838	0.295587	0.569533	0.893402	0.016439	-0.114573	0.828892
ENSDARG00000094132	ENSDARG00000094132	igf1	green	0.122959	0.816491	-0.207075	0.693827	0.263015	0.614575	-0.267888	0.60778	-0.314034	0.544434	-0.170994	0.746009	0.98261	0.000451003	0.314263	0.544123
ENSDARG00000095288	ENSDARG00000095288	rusc2	green	-0.116869	0.825495	-0.0932381	0.860548	-0.175187	0.739908	0.419703	0.407411	-0.118652	0.822857	-0.362624	0.479906	0.66069	0.153164	0.817083	0.047128
ENSDARG00000097026	ENSDARG00000097026	si:dkey-16m19.1	green	-0.213042	0.685272	0.00204128	0.996938	-0.257259	0.622624	0.05534	0.917075	-0.225384	0.667649	0.0980116	0.853453	0.752431	0.0843486	0.0611028	0.90846
ENSDARG00000097937	ENSDARG00000097937	si:dkey-172k15.5	green	0.0963993	0.855849	-0.18533	0.725188	0.151252	0.774852	-0.54213	0.266473	-0.257885	0.621748	0.266296	0.609998	0.766949	0.0751401	-0.352386	0.4933
ENSDARG00000098398	ENSDARG00000098398	CABZ01079480.1	green	0.290326	0.576746	-0.421041	0.405759	0.320818	0.535283	-0.423766	0.4024	-0.375598	0.463096	0.0450102	0.93253	0.989799	0.000155549	0.228185	0.663664
ENSDARG00000101010	ENSDARG00000101010	hpdl	green	0.389609	0.445157	-0.582045	0.225524	0.280326	0.590525	-0.528948	0.280574	-0.22649	0.666074	0.17418	0.741373	0.866832	0.0254197	0.124633	0.814018
ENSDARG00000101190	ENSDARG00000101190	cyp2k8	green	0.294537	0.57097	-0.400514	0.431352	0.334853	0.516494	-0.460105	0.358543	-0.500895	0.311494	0.189888	0.718591	0.957729	0.00264252	0.0919047	0.862531
ENSDARG00000101933	ENSDARG00000101933	CELF6	green	0.0446125	0.933126	-0.227114	0.665187	0.0357711	0.946366	0.161276	0.760183	-0.174984	0.740203	-0.347689	0.499482	0.82347	0.0439936	0.765773	0.0758685
ENSDARG00000102020	ENSDARG00000102020	pnpla3	green	0.38396	0.452362	-0.348432	0.498502	0.577411	0.230139	-0.264645	0.612299	-0.616001	0.192872	-0.135837	0.797497	0.83665	0.0378454	0.532755	0.276473
ENSDARG00000102377	ENSDARG00000102377	slc6a16b	green	0.0204113	0.969387	0.081213	0.878448	-0.10834	0.838126	0.266845	0.609234	0.245433	0.639242	0.0770627	0.884635	-0.934847	0.00622907	-0.0759404	0.886308
ENSDARG00000104373	ENSDARG00000104373	si:zfos-932h1.2	green	0.376794	0.461556	-0.465127	0.352623	0.436613	0.386697	-0.508247	0.303273	-0.464908	0.352881	0.0955713	0.85708	0.974251	0.000985946	0.193709	0.713071
ENSDARG00000012499	ENSDARG00000012499	per1b	grey	0.153186	0.772019	0.152168	0.77351	0.478705	0.336792	-0.44885	0.37194	0.103224	0.845714	-0.180004	0.732911	-0.263771	0.61352	-0.370603	0.469546
ENSDARG00000037057	ENSDARG00000037057	gcdha	grey	0.127884	0.80922	-0.0778562	0.883452	0.328843	0.524515	0.23615	0.65236	-0.29264	0.57357	-0.54981	0.258386	0.488114	0.325977	0.897752	0.0151475
ENSDARG00000058606	ENSDARG00000058606	sik1	grey	-0.107879	0.83881	0.194614	0.711765	-0.134864	0.79893	-0.184485	0.726412	-0.107749	0.839002	0.584724	0.222873	-0.447618	0.373416	-0.851555	0.0314181
ENSDARG00000096091	ENSDARG00000096091	BX927253.2	grey	-0.0335624	0.949675	0.0332318	0.950171	-0.0723394	0.89168	0.665011	0.14953	-0.13145	0.803961	-0.328978	0.524335	-0.195977	0.709798	0.822206	0.0446061
ENSDARG00000002396	ENSDARG00000002396	cry-dash	red	0.0336578	0.949532	-0.0208601	0.968714	0.134682	0.799199	0.131315	0.804159	0.368868	0.471793	-0.689292	0.129812	0.12045	0.820199	0.627031	0.182717
ENSDARG00000007129	ENSDARG00000007129	slc6a16a	red	0.780775	0.0668215	-0.763618	0.0772108	0.558395	0.249463	-0.734045	0.0966924	-0.66841	0.146698	0.967313	0.00158518	-0.0223667	0.966456	-0.455872	0.363562
ENSDARG00000007276	ENSDARG00000007276	ela3l	red	0.769219	0.0737444	-0.772385	0.0718165	0.523572	0.286404	-0.676836	0.139778	-0.694886	0.125439	0.97714	0.000777898	-0.00847076	0.987294	-0.402441	0.428928
ENSDARG00000012539	ENSDARG00000012539	dnase1	red	0.578273	0.229278	-0.669326	0.145939	0.265289	0.611402	-0.573825	0.233736	-0.542584	0.265992	0.990266	0.000141667	0.0210159	0.968481	-0.494799	0.318371
ENSDARG00000013763	ENSDARG00000013763	rrbp1a	red	0.780311	0.0670935	-0.750709	0.0854727	0.575305	0.232248	-0.714403	0.110701	-0.71507	0.110212	0.964099	0.00191016	-0.0144591	0.978313	-0.432558	0.39163
ENSDARG00000017294	ENSDARG00000017294	gnai2b	red	0.650957	0.161485	-0.650969	0.161474	0.378682	0.459129	-0.638651	0.172269	-0.462688	0.355494	0.959679	0.00240586	-0.237143	0.650954	-0.573068	0.234498
ENSDARG00000017490	ENSDARG00000017490	cel.1	red	0.699594	0.12181	-0.761773	0.0783682	0.440575	0.381897	-0.686609	0.131931	-0.676336	0.140185	0.974325	0.00098032	0.172617	0.743647	-0.418322	0.409119
ENSDARG00000018263	ENSDARG00000018263	pdia2	red	0.57047	0.237121	-0.703947	0.118497	0.294183	0.571455	-0.64549	0.166239	-0.573698	0.233864	0.911585	0.0113803	0.332519	0.519604	-0.418845	0.408472
ENSDARG00000020133	ENSDARG00000020133	jdp2b	red	-0.189837	0.718665	0.333943	0.517706	0.129576	0.806724	0.423426	0.402819	0.0900628	0.865271	-0.83032	0.0407441	0.120365	0.820324	0.738344	0.093739
ENSDARG00000021339	ENSDARG00000021339	cpa5	red	0.647516	0.16447	-0.686488	0.132027	0.372452	0.467155	-0.623281	0.186145	-0.60194	0.206141	0.999289	7.57846e-07	-0.0351573	0.947286	-0.503229	0.308875
ENSDARG00000024503	ENSDARG00000024503	c6ast3	red	0.682217	0.135433	-0.728072	0.100863	0.408423	0.42143	-0.634757	0.175742	-0.649405	0.162828	0.994942	3.83055e-05	0.0323046	0.95156	-0.446554	0.374693
ENSDARG00000030915	ENSDARG00000030915	cpa1	red	0.625997	0.18366	-0.66634	0.148421	0.344966	0.503077	-0.566353	0.241301	-0.616803	0.192125	0.998277	4.45024e-06	-0.0617463	0.907498	-0.474146	0.342079
ENSDARG00000031763	ENSDARG00000031763	smad6b	red	-0.350547	0.495717	0.196896	0.708473	-0.257935	0.621678	0.326154	0.528117	0.380853	0.456341	-0.736865	0.0947505	0.603046	0.205084	0.617961	0.191051
ENSDARG00000039393	ENSDARG00000039393	si:ch211-240l19.5	red	0.628616	0.181278	-0.676738	0.139857	0.349058	0.497678	-0.585618	0.221992	-0.622498	0.186863	0.998846	1.99742e-06	-0.0171439	0.974287	-0.475332	0.3407
ENSDARG00000039579	ENSDARG00000039579	cfd	red	0.262897	0.61474	-0.271489	0.602772	-0.00724885	0.989127	-0.336118	0.51481	-0.149574	0.777312	0.836366	0.0379733	-0.528848	0.280682	-0.7308	0.0989483
ENSDARG00000039730	ENSDARG00000039730	zgc:112160	red	0.641399	0.169835	-0.68492	0.133273	0.354002	0.491178	-0.581113	0.226449	-0.607292	0.201048	0.998466	3.52605e-06	-0.0597042	0.91055	-0.470836	0.345935
ENSDARG00000040282	ENSDARG00000040282	zgc:92590	red	0.659053	0.154551	-0.702247	0.119786	0.38177	0.455166	-0.604214	0.203971	-0.637854	0.172977	0.997835	7.02883e-06	-0.00943624	0.985846	-0.45732	0.361842
ENSDARG00000042993	ENSDARG00000042993	try	red	0.660353	0.153449	-0.710286	0.113743	0.378731	0.459066	-0.602666	0.205448	-0.640536	0.170598	0.996822	1.51353e-05	0.00851218	0.987232	-0.44565	0.375779
ENSDARG00000043722	ENSDARG00000043722	cpa4	red	0.682363	0.135316	-0.749724	0.0861189	0.398706	0.433631	-0.629693	0.180301	-0.660064	0.153694	0.986871	0.000257425	0.100033	0.850451	-0.407459	0.422635
ENSDARG00000044204	ENSDARG00000044204	endou	red	0.654603	0.158346	-0.728272	0.100723	0.370759	0.469345	-0.597738	0.210176	-0.668669	0.146483	0.984702	0.000349237	0.111162	0.833944	-0.398576	0.433796
ENSDARG00000045442	ENSDARG00000045442	cpb1	red	0.778863	0.0679454	-0.813051	0.0491578	0.530978	0.278385	-0.714032	0.110974	-0.716031	0.109508	0.966534	0.00166123	0.138152	0.794091	-0.367581	0.473461
ENSDARG00000056744	ENSDARG00000056744	ela2	red	0.654662	0.158295	-0.718275	0.107874	0.351773	0.494105	-0.556768	0.251145	-0.636164	0.174484	0.992085	9.37254e-05	-0.00581116	0.991283	-0.40074	0.431068
ENSDARG00000056765	ENSDARG00000056765	ela2l	red	0.791244	0.0608196	-0.842325	0.0353319	0.554993	0.252984	-0.732467	0.0977864	-0.747402	0.0876497	0.933329	0.00651943	0.265239	0.611471	-0.305366	0.556189
ENSDARG00000060397	ENSDARG00000060397	hhip	red	0.00849165	0.987263	0.113727	0.830146	0.329747	0.523306	-0.0221413	0.966793	0.146344	0.782051	-0.744521	0.0895669	0.372538	0.467044	0.523863	0.286088
ENSDARG00000062045	ENSDARG00000062045	il1rapl1a	red	0.343311	0.505265	-0.349616	0.496943	0.0646186	0.903207	-0.334144	0.517438	-0.28612	0.582532	0.886053	0.0187362	-0.482515	0.332398	-0.645238	0.16646
ENSDARG00000068680	ENSDARG00000068680	ctrl	red	0.57371	0.233851	-0.583758	0.223827	0.297152	0.567391	-0.5106	0.30066	-0.531619	0.277694	0.979346	0.000635463	-0.242398	0.643525	-0.534147	0.274979
ENSDARG00000068991	ENSDARG00000068991	zgc:158862	red	0.424323	0.401715	-0.474844	0.341268	0.117453	0.82463	-0.418785	0.408546	-0.395224	0.438032	0.957045	0.00272803	-0.28457	0.584668	-0.604142	0.204039
ENSDARG00000073742	ENSDARG00000073742	prss59.2	red	0.664518	0.149943	-0.700219	0.121332	0.392798	0.441105	-0.61618	0.192705	-0.634361	0.176096	0.998134	5.22162e-06	-0.0223689	0.966452	-0.470459	0.346375
ENSDARG00000074547	ENSDARG00000074547	si:ch211-240l19.8	red	0.68528	0.132986	-0.716394	0.109243	0.422639	0.403788	-0.652239	0.160378	-0.640117	0.170969	0.995916	2.49839e-05	0.00200676	0.99699	-0.476807	0.33899
ENSDARG00000074613	ENSDARG00000074613	si:ch211-240l19.6	red	0.621428	0.187847	-0.655083	0.157934	0.344017	0.504331	-0.55516	0.252811	-0.61817	0.190857	0.996829	1.50685e-05	-0.0839784	0.874329	-0.475618	0.340369
ENSDARG00000076313	ENSDARG00000076313	si:ch211-240l19.7	red	0.735524	0.0956716	-0.772785	0.0715746	0.463337	0.35473	-0.637516	0.173278	-0.69022	0.129081	0.984917	0.000339516	0.038492	0.942291	-0.379598	0.457952
ENSDARG00000086216	ENSDARG00000086216	prr13	red	0.713858	0.111102	-0.728881	0.100294	0.528649	0.280897	-0.797703	0.0572467	-0.676464	0.14008	0.942477	0.00486816	0.208509	0.691769	-0.503848	0.308182
ENSDARG00000090428	ENSDARG00000090428	ctrb1	red	0.698867	0.122368	-0.742523	0.090907	0.439536	0.383153	-0.66869	0.146466	-0.670359	0.145085	0.988759	0.000188819	0.0854414	0.87215	-0.442463	0.379616
ENSDARG00000090469	ENSDARG00000090469	sycn.1	red	0.585853	0.22176	-0.655825	0.1573	0.272862	0.600865	-0.508205	0.303321	-0.579196	0.228357	0.992719	7.93243e-05	-0.0668378	0.899893	-0.449697	0.370925
ENSDARG00000096121	ENSDARG00000096121	CR381686.5	red	0.592379	0.215368	-0.617709	0.191284	0.316227	0.541471	-0.567383	0.240252	-0.54929	0.258931	0.994345	4.78745e-05	-0.150443	0.776037	-0.5479	0.260388
ENSDARG00000103687	ENSDARG00000103687	sycn.2	red	0.507375	0.304244	-0.553583	0.254449	0.225429	0.667585	-0.530737	0.278644	-0.497016	0.315863	0.988644	0.000192713	-0.139632	0.791914	-0.597298	0.210601
ENSDARG00000105307	ENSDARG00000105307	BX005331.1	red	0.58748	0.22016	-0.698155	0.122915	0.311668	0.547635	-0.649989	0.162322	-0.586896	0.220733	0.947506	0.00406116	0.247186	0.636773	-0.459456	0.359312
ENSDARG00000000002	ENSDARG00000000002	ccdc80	turquoise	-0.85703	0.0291995	0.969415	0.00138888	-0.579376	0.228177	0.618044	0.190974	0.470855	0.345913	-0.545755	0.262643	-0.338095	0.512181	-0.165045	0.75468
ENSDARG00000000086	ENSDARG00000000086	itsn1	turquoise	-0.92131	0.00904465	0.94299	0.00478251	-0.720605	0.106187	0.70217	0.119845	0.840953	0.0359324	-0.803	0.0543906	-0.328609	0.524829	0.0239557	0.964073
ENSDARG00000000103	ENSDARG00000000103	myh10	turquoise	-0.964422	0.0018762	0.910319	0.0117034	-0.81126	0.0500725	0.851965	0.0312497	0.673743	0.142301	-0.761419	0.078591	-0.129474	0.806874	0.201707	0.701543
ENSDARG00000000730	ENSDARG00000000730	slc6a22.1	turquoise	-0.948533	0.00390511	0.931474	0.00688287	-0.867502	0.0251707	0.754539	0.082982	0.759518	0.0797933	-0.504693	0.307237	-0.507488	0.304119	-0.178718	0.734777
ENSDARG00000000804	ENSDARG00000000804	rassf6	turquoise	-0.908543	0.012164	0.934108	0.00636958	-0.648156	0.163914	0.641381	0.16985	0.464706	0.353118	-0.615573	0.19327	-0.0355604	0.946682	-0.0344602	0.94833
ENSDARG00000000906	ENSDARG00000000906	skap2	turquoise	-0.764369	0.0767417	0.916995	0.0100488	-0.457353	0.361803	0.458898	0.359972	0.370509	0.469668	-0.432582	0.391601	-0.325538	0.528943	-0.301224	0.561829
ENSDARG00000001234	ENSDARG00000001234	map4k2	turquoise	-0.903475	0.013526	0.893383	0.0164448	-0.773987	0.0708502	0.688761	0.130229	0.91632	0.0102105	-0.737406	0.0943796	-0.412053	0.416901	-0.0304555	0.954331
ENSDARG00000001354	ENSDARG00000001354	slc6a22.2	turquoise	-0.911685	0.0113548	0.992659	8.06384e-05	-0.665831	0.148845	0.638645	0.172274	0.719134	0.10725	-0.675683	0.140716	-0.402018	0.42946	-0.147957	0.779684
ENSDARG00000001498	ENSDARG00000001498	skap1	turquoise	-0.952929	0.00327132	0.884358	0.0192863	-0.818681	0.0463343	0.530152	0.279274	0.744097	0.0898506	-0.528344	0.281227	-0.085948	0.871395	-0.259824	0.619035
ENSDARG00000001804	ENSDARG00000001804	zgc:112148	turquoise	-0.866362	0.0255955	0.929908	0.0071972	-0.5919	0.215834	0.561202	0.246571	0.406413	0.423945	-0.51415	0.296733	-0.108641	0.83768	-0.166179	0.753026
ENSDARG00000001807	ENSDARG00000001807	tnfrsf21	turquoise	-0.913593	0.0108768	0.966594	0.00165526	-0.676199	0.140296	0.555638	0.252315	0.566757	0.24089	-0.507884	0.303677	-0.243966	0.641311	-0.27824	0.593411
ENSDARG00000001898	ENSDARG00000001898	manea	turquoise	-0.843327	0.0348966	0.947395	0.00407819	-0.590198	0.217496	0.790219	0.0613959	0.504178	0.307813	-0.684388	0.133698	-0.405763	0.424759	0.101494	0.848282
ENSDARG00000001953	ENSDARG00000001953	pfkfb3	turquoise	-0.683344	0.134531	0.843868	0.0346628	-0.362074	0.480622	0.28634	0.582229	0.289757	0.577528	-0.328723	0.524677	-0.225444	0.667563	-0.422938	0.40342
ENSDARG00000002131	ENSDARG00000002131	celf2	turquoise	-0.788377	0.0624379	0.829017	0.0413535	-0.676047	0.14042	0.517757	0.292763	0.37769	0.460404	-0.144849	0.784247	-0.431906	0.392426	-0.445289	0.376213
ENSDARG00000002190	ENSDARG00000002190	chmp2bb	turquoise	-0.92133	0.00904009	0.95425	0.00309171	-0.733755	0.0968929	0.604387	0.203806	0.850052	0.0320408	-0.671133	0.144446	-0.403438	0.427676	-0.190495	0.717714
ENSDARG00000002285	ENSDARG00000002285	mcoln1a	turquoise	-0.883108	0.0196972	0.848662	0.0326219	-0.725204	0.102894	0.635031	0.175496	0.910943	0.0115435	-0.827424	0.0421041	-0.201425	0.701948	0.0662157	0.900822
ENSDARG00000002405	ENSDARG00000002405	si:ch211-225b11.1	turquoise	-0.905184	0.0130589	0.960695	0.002287	-0.683527	0.134385	0.513852	0.297062	0.618567	0.190489	-0.475792	0.340167	-0.306698	0.554378	-0.356094	0.488436
ENSDARG00000002840	ENSDARG00000002840	si:dkey-28b4.8	turquoise	-0.952058	0.00339251	0.925391	0.00814211	-0.835205	0.0384982	0.700172	0.121369	0.886309	0.0186536	-0.668064	0.146985	-0.392624	0.441326	-0.105812	0.841874
ENSDARG00000002912	ENSDARG00000002912	adipor1a	turquoise	-0.837433	0.0374938	0.936048	0.00600392	-0.588694	0.218968	0.781012	0.066683	0.643203	0.168245	-0.791767	0.0605268	-0.43415	0.389691	0.151827	0.77401
ENSDARG00000002917	ENSDARG00000002917	gls2b	turquoise	-0.887537	0.0182606	0.962691	0.00206198	-0.646666	0.165212	0.552159	0.255932	0.526244	0.283501	-0.469683	0.347282	-0.304819	0.556932	-0.299398	0.564321
ENSDARG00000002949	ENSDARG00000002949	ppp6c	turquoise	-0.891562	0.0170006	0.962924	0.00203641	-0.636105	0.174536	0.764718	0.0765238	0.680072	0.137158	-0.816783	0.0472774	-0.330165	0.522748	0.12604	0.811941
ENSDARG00000002956	ENSDARG00000002956	si:dkey-32n7.4	turquoise	-0.826221	0.0426747	0.942072	0.00493628	-0.541778	0.266845	0.402454	0.428912	0.581914	0.225654	-0.493353	0.320011	-0.318155	0.53887	-0.392349	0.441675
ENSDARG00000002968	ENSDARG00000002968	a1cf	turquoise	-0.908135	0.0122712	0.954655	0.00303757	-0.672573	0.143262	0.579983	0.227573	0.824656	0.0434227	-0.747289	0.0877251	-0.30334	0.558946	-0.125087	0.813349
ENSDARG00000002986	ENSDARG00000002986	gda	turquoise	0.696987	0.123814	-0.759631	0.0797222	0.616715	0.192208	-0.709917	0.114017	-0.782386	0.065881	0.604935	0.203284	0.736866	0.0947496	-0.0328735	0.950708
ENSDARG00000003008	ENSDARG00000003008	prkcea	turquoise	-0.553974	0.254043	0.545394	0.263024	-0.417013	0.41074	0.0471922	0.929264	0.127678	0.809524	0.0597996	0.910407	0.124847	0.813703	-0.599773	0.208218
ENSDARG00000003017	ENSDARG00000003017	ube2al	turquoise	-0.819033	0.0461606	0.964007	0.00191994	-0.520763	0.28947	0.663251	0.151006	0.545745	0.262654	-0.681224	0.13623	-0.432593	0.391587	-0.0309036	0.953659
ENSDARG00000003061	ENSDARG00000003061	cd276	turquoise	-0.793112	0.0597761	0.923751	0.00849928	-0.485251	0.329254	0.430682	0.393919	0.411765	0.41726	-0.45251	0.367565	-0.249049	0.63415	-0.3237	0.531409
ENSDARG00000003165	ENSDARG00000003165	nr2f6b	turquoise	-0.850407	0.0318934	0.949796	0.00371733	-0.572913	0.234654	0.437629	0.385464	0.562627	0.245109	-0.493611	0.319718	-0.277911	0.593866	-0.364223	0.477824
ENSDARG00000003169	ENSDARG00000003169	magi1b	turquoise	-0.941929	0.00496039	0.955312	0.0029509	-0.754748	0.0828468	0.596013	0.211842	0.841503	0.0356913	-0.669229	0.146019	-0.324964	0.529713	-0.193629	0.713186
ENSDARG00000003181	ENSDARG00000003181	sult1st4	turquoise	-0.900612	0.0143261	0.851397	0.0314835	-0.850547	0.031835	0.832483	0.0397424	0.860326	0.0279008	-0.677519	0.139223	-0.479031	0.336416	0.0828956	0.875941
ENSDARG00000003216	ENSDARG00000003216	anxa2a	turquoise	-0.943336	0.0047253	0.957302	0.0026958	-0.755447	0.0823962	0.556973	0.250932	0.798988	0.0565476	-0.60105	0.206993	-0.3064	0.554783	-0.271964	0.602112
ENSDARG00000003313	ENSDARG00000003313	si:ch73-70c5.1	turquoise	-0.86714	0.0253052	0.929726	0.0072342	-0.704725	0.117909	0.70365	0.118722	0.809303	0.0510806	-0.661022	0.152883	-0.584556	0.223039	-0.0914039	0.863276
ENSDARG00000003375	ENSDARG00000003375	gng12a	turquoise	-0.890349	0.0173758	0.941619	0.00501307	-0.672168	0.143594	0.44639	0.37489	0.743244	0.0904224	-0.531279	0.27806	-0.319371	0.537231	-0.384776	0.45132
ENSDARG00000003382	ENSDARG00000003382	cwc25	turquoise	-0.871609	0.023668	0.987372	0.000238198	-0.577012	0.230538	0.651409	0.161094	0.575409	0.232144	-0.681761	0.135799	-0.348339	0.498625	-0.0706653	0.894178
ENSDARG00000003411	ENSDARG00000003411	foxa2	turquoise	-0.962693	0.00206175	0.946854	0.00416167	-0.783397	0.065294	0.84129	0.0357843	0.690811	0.128618	-0.76907	0.0738354	-0.222864	0.671238	0.155066	0.769265
ENSDARG00000003475	ENSDARG00000003475	sult1st5	turquoise	-0.867349	0.0252274	0.914438	0.0106681	-0.67869	0.138274	0.733616	0.096989	0.829459	0.0411464	-0.800214	0.0558847	-0.450725	0.369696	0.0733104	0.890231
ENSDARG00000003523	ENSDARG00000003523	itln3	turquoise	-0.815151	0.0480956	0.924668	0.00829863	-0.526185	0.283565	0.359511	0.483967	0.563149	0.244575	-0.476406	0.339454	-0.258847	0.6204	-0.414403	0.413979
ENSDARG00000003576	ENSDARG00000003576	klhl32	turquoise	-0.87228	0.0234269	0.881984	0.0200698	-0.683557	0.13436	0.40249	0.428867	0.850669	0.0317846	-0.594001	0.213791	-0.241959	0.644144	-0.339241	0.510659
ENSDARG00000003584	ENSDARG00000003584	pla2g7	turquoise	-0.930685	0.00704028	0.990192	0.000143814	-0.685504	0.132809	0.587881	0.219766	0.689772	0.129434	-0.625068	0.184508	-0.301704	0.561176	-0.216543	0.680263
ENSDARG00000003615	ENSDARG00000003615	slc26a3.2	turquoise	-0.831125	0.0403699	0.786902	0.0632777	-0.744835	0.0893568	0.914563	0.0106373	0.33437	0.517137	-0.488551	0.325477	-0.208665	0.691545	0.242355	0.643584
ENSDARG00000003641	ENSDARG00000003641	tfg	turquoise	-0.797731	0.0572316	0.907281	0.0124968	-0.507755	0.303821	0.760422	0.0792208	0.579876	0.227679	-0.855542	0.029795	-0.318127	0.538907	0.25225	0.629651
ENSDARG00000003699	ENSDARG00000003699	atp7a	turquoise	-0.843754	0.0347122	0.863446	0.0266975	-0.715982	0.109544	0.654738	0.15823	0.91722	0.00999523	-0.713979	0.111013	-0.513355	0.297611	-0.0526703	0.921068
ENSDARG00000003820	ENSDARG00000003820	nr1d2a	turquoise	-0.845394	0.0340066	0.949173	0.00380945	-0.638601	0.172313	0.652841	0.159859	0.510734	0.300511	-0.446394	0.374884	-0.521635	0.288517	-0.233231	0.656497
ENSDARG00000003927	ENSDARG00000003927	cldn12	turquoise	-0.885396	0.0189484	0.986078	0.000289379	-0.593198	0.214571	0.551426	0.256697	0.63472	0.175774	-0.649158	0.163043	-0.298394	0.565694	-0.196549	0.708973
ENSDARG00000003963	ENSDARG00000003963	traf4a	turquoise	-0.84915	0.0324171	0.893262	0.0164816	-0.615135	0.193678	0.33534	0.515845	0.724502	0.103393	-0.519048	0.291347	-0.197476	0.707636	-0.421504	0.405187
ENSDARG00000004017	ENSDARG00000004017	spag1a	turquoise	-0.951028	0.00353863	0.937682	0.00570429	-0.819449	0.0459552	0.838161	0.0371682	0.787532	0.0629181	-0.724385	0.103477	-0.398526	0.433859	0.076865	0.88493
ENSDARG00000004034	ENSDARG00000004034	arhgdig	turquoise	-0.854343	0.030279	0.967764	0.00154198	-0.584138	0.223452	0.488874	0.325109	0.612897	0.19577	-0.529278	0.280218	-0.386868	0.448649	-0.332728	0.519326
ENSDARG00000004037	ENSDARG00000004037	cog2	turquoise	-0.855076	0.0299827	0.907257	0.012503	-0.647265	0.164689	0.833134	0.0394432	0.388507	0.44656	-0.588344	0.219311	-0.288334	0.579484	0.132096	0.803009
ENSDARG00000004051	ENSDARG00000004051	CR354540.1	turquoise	-0.808248	0.0516278	0.954984	0.002994	-0.548887	0.259353	0.628631	0.181263	0.563927	0.243778	-0.570541	0.237049	-0.549737	0.258463	-0.162709	0.75809
ENSDARG00000004060	ENSDARG00000004060	bhlhe40	turquoise	0.603653	0.204505	-0.443006	0.378962	0.707062	0.11615	-0.819015	0.0461694	-0.0921888	0.862109	0.154401	0.770239	0.0556525	0.916607	-0.293401	0.572528
ENSDARG00000004094	ENSDARG00000004094	acsbg2	turquoise	-0.737122	0.0945743	0.90689	0.0126005	-0.399902	0.432123	0.429588	0.395257	0.348306	0.498668	-0.468162	0.349062	-0.286721	0.581704	-0.270483	0.60417
ENSDARG00000004171	ENSDARG00000004171	rabac1	turquoise	-0.866918	0.0253877	0.954012	0.00312375	-0.594261	0.213539	0.562424	0.245317	0.449865	0.370724	-0.502539	0.309649	-0.231192	0.659391	-0.22067	0.674368
ENSDARG00000004184	ENSDARG00000004184	nf1b	turquoise	-0.956781	0.00276152	0.957422	0.00268068	-0.797212	0.0575151	0.677163	0.139512	0.598917	0.209041	-0.478773	0.336713	-0.294659	0.570803	-0.218279	0.677782
ENSDARG00000004270	ENSDARG00000004270	atl3	turquoise	-0.849552	0.0322494	0.977189	0.00077456	-0.555117	0.252856	0.646024	0.165772	0.629681	0.180313	-0.722076	0.105129	-0.406316	0.424066	-0.0498818	0.925239
ENSDARG00000004305	ENSDARG00000004305	vangl1	turquoise	-0.869087	0.0245855	0.970852	0.00126204	-0.64042	0.170701	0.561525	0.24624	0.630999	0.17912	-0.500878	0.311513	-0.482795	0.332075	-0.317453	0.539816
ENSDARG00000004433	ENSDARG00000004433	btk	turquoise	-0.948793	0.00386606	0.988116	0.000210997	-0.706793	0.116352	0.72475	0.103217	0.608555	0.199854	-0.68638	0.132113	-0.228218	0.663616	-0.0198449	0.970237
ENSDARG00000004497	ENSDARG00000004497	tspan33a	turquoise	-0.857245	0.0291137	0.933581	0.00647075	-0.598158	0.209771	0.8058	0.0529084	0.445218	0.376298	-0.701365	0.120458	-0.25753	0.622246	0.170465	0.746779
ENSDARG00000004618	ENSDARG00000004618	stx2a	turquoise	-0.889333	0.0176932	0.899565	0.0146243	-0.726287	0.102125	0.897774	0.0151411	0.467583	0.349741	-0.62667	0.183047	-0.288416	0.579371	0.194285	0.71224
ENSDARG00000004647	ENSDARG00000004647	spice1	turquoise	0.321637	0.534182	-0.429426	0.395456	0.182133	0.729822	0.152271	0.773359	0.00157565	0.997637	-0.291055	0.575745	0.191658	0.716033	0.81498	0.0481816
ENSDARG00000004696	ENSDARG00000004696	eefsec	turquoise	-0.834753	0.0387035	0.914038	0.0107667	-0.568868	0.238744	0.351783	0.494092	0.720396	0.106338	-0.567214	0.240424	-0.252068	0.629906	-0.384828	0.451253
ENSDARG00000004702	ENSDARG00000004702	irf2bp2a	turquoise	-0.618098	0.190924	0.76836	0.074271	-0.357874	0.486106	0.766075	0.0756813	0.432444	0.39177	-0.779652	0.0674803	-0.451637	0.368607	0.373624	0.465642
ENSDARG00000004866	ENSDARG00000004866	fam63a	turquoise	-0.902439	0.0138131	0.977812	0.000732984	-0.60416	0.204022	0.603505	0.204646	0.562318	0.245426	-0.679508	0.137613	-0.163646	0.756723	-0.0881993	0.868044
ENSDARG00000004877	ENSDARG00000004877	rock2b	turquoise	-0.874738	0.0225533	0.927914	0.00760731	-0.662689	0.151479	0.416339	0.411576	0.747474	0.0876023	-0.505493	0.306343	-0.334656	0.516755	-0.420345	0.406618
ENSDARG00000004954	ENSDARG00000004954	grna	turquoise	-0.803431	0.0541614	0.922027	0.00888263	-0.523281	0.286722	0.462538	0.355671	0.400368	0.431537	-0.40762	0.422434	-0.284519	0.584738	-0.336649	0.514104
ENSDARG00000005049	ENSDARG00000005049	rab20	turquoise	-0.853486	0.0306271	0.966601	0.00165458	-0.563088	0.244637	0.483567	0.331188	0.565869	0.241794	-0.542368	0.26622	-0.31001	0.549882	-0.30273	0.559777
ENSDARG00000005078	ENSDARG00000005078	eif4e3	turquoise	-0.875718	0.0222091	0.937969	0.00565236	-0.662815	0.151373	0.795811	0.058283	0.728986	0.10022	-0.802172	0.0548326	-0.428337	0.396788	0.138353	0.793795
ENSDARG00000005104	ENSDARG00000005104	limk2	turquoise	-0.959911	0.00237845	0.909762	0.0118468	-0.868265	0.0248883	0.775519	0.0699318	0.869568	0.0244094	-0.685972	0.132437	-0.374834	0.464081	-0.00957276	0.985641
ENSDARG00000005220	ENSDARG00000005220	pdcd6	turquoise	-0.784537	0.0646349	0.915873	0.0103182	-0.499688	0.312851	0.534467	0.274636	0.334282	0.517255	-0.426353	0.399221	-0.308268	0.552245	-0.234172	0.655162
ENSDARG00000005463	ENSDARG00000005463	slc30a1a	turquoise	-0.834712	0.0387222	0.924804	0.00826902	-0.56292	0.244809	0.455945	0.363475	0.80018	0.0559027	-0.717054	0.108762	-0.324013	0.530989	-0.209496	0.690353
ENSDARG00000005464	ENSDARG00000005464	dnase1l1	turquoise	-0.806718	0.0524268	0.939319	0.00541148	-0.529055	0.280459	0.583252	0.224329	0.393179	0.440622	-0.470649	0.346153	-0.372165	0.467527	-0.203567	0.698868
ENSDARG00000005565	ENSDARG00000005565	entpd8	turquoise	-0.861749	0.0273486	0.947077	0.00412718	-0.608422	0.199979	0.48001	0.335284	0.517994	0.292502	-0.443187	0.378744	-0.285863	0.582886	-0.359719	0.483695
ENSDARG00000005675	ENSDARG00000005675	sec61a1l	turquoise	-0.610564	0.197959	0.783033	0.0655052	-0.252608	0.629148	0.502485	0.309709	0.580356	0.227202	-0.899743	0.0145733	-0.26099	0.617404	0.221645	0.672977
ENSDARG00000005713	ENSDARG00000005713	ethe1	turquoise	-0.926532	0.00789813	0.993711	5.91968e-05	-0.669333	0.145933	0.6566	0.156638	0.714096	0.110926	-0.7263	0.102116	-0.316739	0.54078	-0.0831816	0.875515
ENSDARG00000005861	ENSDARG00000005861	ralgapa2	turquoise	-0.940407	0.00522122	0.987667	0.00022721	-0.727697	0.101128	0.621189	0.188067	0.749995	0.0859409	-0.62696	0.182782	-0.372751	0.466769	-0.212522	0.686016
ENSDARG00000005924	ENSDARG00000005924	serpina10a	turquoise	-0.964695	0.00184762	0.959579	0.00241772	-0.790228	0.0613908	0.590679	0.217026	0.756531	0.0816999	-0.571938	0.235637	-0.26485	0.612014	-0.258132	0.621402
ENSDARG00000005927	ENSDARG00000005927	tbc1d17	turquoise	-0.905598	0.0129469	0.908322	0.0122219	-0.766762	0.0752558	0.908525	0.0121687	0.678651	0.138306	-0.736355	0.0950999	-0.402778	0.428504	0.211643	0.687275
ENSDARG00000005941	ENSDARG00000005941	yes1	turquoise	-0.848552	0.0326678	0.976782	0.000802344	-0.527566	0.282069	0.560478	0.247316	0.615556	0.193286	-0.707926	0.115503	-0.31187	0.547361	-0.11886	0.822549
ENSDARG00000006052	ENSDARG00000006052	malt2	turquoise	-0.831961	0.0399834	0.943452	0.00470616	-0.5632	0.244522	0.425913	0.399762	0.718207	0.107922	-0.582391	0.225181	-0.394669	0.438734	-0.347508	0.499721
ENSDARG00000006060	ENSDARG00000006060	aim1b	turquoise	0.627006	0.182741	-0.763937	0.0770111	0.406401	0.42396	-0.773185	0.0713333	-0.514685	0.296142	0.760359	0.0792606	0.541237	0.267419	-0.330799	0.521901
ENSDARG00000006128	ENSDARG00000006128	cep170aa	turquoise	-0.764126	0.0768932	0.851829	0.0313053	-0.486022	0.328371	0.671475	0.144164	0.20026	0.703626	-0.518415	0.292041	-0.107376	0.839555	0.0768277	0.884985
ENSDARG00000006202	ENSDARG00000006202	erbb3a	turquoise	-0.833647	0.0392081	0.933949	0.00640011	-0.516522	0.29412	0.410611	0.418698	0.521114	0.289086	-0.558758	0.249088	-0.139641	0.791901	-0.287618	0.58047
ENSDARG00000006242	ENSDARG00000006242	ptp4a1	turquoise	-0.952638	0.00331165	0.928155	0.00755723	-0.84743	0.0331408	0.883385	0.0196056	0.656107	0.157059	-0.606208	0.202075	-0.394259	0.439253	0.0605161	0.909337
ENSDARG00000006251	ENSDARG00000006251	ell2	turquoise	-0.901294	0.0141334	0.929801	0.00721886	-0.72878	0.100365	0.800201	0.0558917	0.79592	0.0582231	-0.785128	0.0642946	-0.433635	0.390318	0.108062	0.838537
ENSDARG00000006266	ENSDARG00000006266	stat1a	turquoise	-0.938832	0.00549781	0.989657	0.000159912	-0.714577	0.110573	0.708329	0.115202	0.586735	0.220892	-0.597525	0.210382	-0.316486	0.541121	-0.111554	0.833363
ENSDARG00000006332	ENSDARG00000006332	snx14	turquoise	-0.888866	0.01784	0.964117	0.00190825	-0.6533	0.159465	0.756633	0.081634	0.717128	0.108708	-0.782356	0.0658985	-0.414793	0.413494	0.0694656	0.895969
ENSDARG00000006397	ENSDARG00000006397	laptm4a	turquoise	-0.900542	0.0143458	0.97598	0.00085852	-0.663431	0.150855	0.543574	0.264945	0.745893	0.0886514	-0.613593	0.195118	-0.391052	0.443322	-0.27149	0.60277
ENSDARG00000006491	ENSDARG00000006491	agpat9l	turquoise	-0.436955	0.386282	0.658681	0.154866	0.0280224	0.957977	0.0975523	0.854136	0.235852	0.652782	-0.655973	0.157174	0.096708	0.85539	-0.0469133	0.929682
ENSDARG00000006566	ENSDARG00000006566	nlk1	turquoise	-0.880543	0.0205525	0.983379	0.000412074	-0.578591	0.22896	0.666001	0.148703	0.551025	0.257116	-0.708075	0.115391	-0.269115	0.606072	-0.0190059	0.971495
ENSDARG00000006758	ENSDARG00000006758	fam234b	turquoise	-0.87719	0.0216974	0.85332	0.0306946	-0.793535	0.059541	0.444607	0.377034	0.843124	0.0349847	-0.39906	0.433185	-0.411198	0.417967	-0.464224	0.353685
ENSDARG00000006869	ENSDARG00000006869	stx17	turquoise	-0.708665	0.11495	0.853669	0.0305526	-0.411847	0.417157	0.694758	0.125539	0.590223	0.217471	-0.855987	0.0296161	-0.402664	0.428648	0.248546	0.634858
ENSDARG00000006924	ENSDARG00000006924	fbxo38	turquoise	-0.906983	0.0125759	0.8591	0.0283806	-0.784628	0.0645826	0.923773	0.00849443	0.6813	0.136169	-0.79647	0.057921	-0.233687	0.65585	0.332619	0.519471
ENSDARG00000006990	ENSDARG00000006990	creld1b	turquoise	-0.908091	0.0122827	0.969598	0.00137235	-0.665806	0.148866	0.504321	0.307653	0.688372	0.130536	-0.564557	0.243133	-0.294003	0.571702	-0.315395	0.542594
ENSDARG00000007127	ENSDARG00000007127	acat2	turquoise	-0.858382	0.0286634	0.874496	0.0226383	-0.709798	0.114106	0.416591	0.411263	0.872867	0.0232167	-0.520142	0.290149	-0.390769	0.443681	-0.40387	0.427133
ENSDARG00000007217	ENSDARG00000007217	wdr55	turquoise	0.7461	0.0885142	-0.802328	0.0547492	0.596456	0.211414	-0.778631	0.0680825	-0.770121	0.0731925	0.798801	0.0566491	0.535613	0.273409	-0.235848	0.652787
ENSDARG00000007219	ENSDARG00000007219	actn1	turquoise	-0.952868	0.00327979	0.962377	0.00209664	-0.723535	0.104084	0.737519	0.0943024	0.567571	0.240062	-0.679758	0.137411	-0.126136	0.8118	0.0281798	0.957741
ENSDARG00000007247	ENSDARG00000007247	ric8a	turquoise	-0.923684	0.00851402	0.990238	0.00014248	-0.68026	0.137006	0.620687	0.188531	0.603333	0.20481	-0.574339	0.233219	-0.312531	0.546467	-0.206452	0.694722
ENSDARG00000007323	ENSDARG00000007323	chmp4bb	turquoise	-0.88842	0.0179805	0.969267	0.00140229	-0.636065	0.174571	0.54713	0.261197	0.774047	0.070814	-0.682846	0.134929	-0.373408	0.465921	-0.207676	0.692964
ENSDARG00000007347	ENSDARG00000007347	degs1	turquoise	-0.837865	0.0373006	0.941509	0.0050318	-0.538507	0.270321	0.541234	0.267422	0.403385	0.427741	-0.519332	0.291035	-0.192915	0.714217	-0.189705	0.718856
ENSDARG00000007383	ENSDARG00000007383	kcnk6	turquoise	-0.762758	0.0777493	0.78798	0.0626632	-0.61053	0.197992	0.910519	0.0116521	0.282043	0.588153	-0.566944	0.2407	-0.268401	0.607067	0.32926	0.523958
ENSDARG00000007425	ENSDARG00000007425	apol1	turquoise	-0.924667	0.0082989	0.984511	0.000358009	-0.684352	0.133726	0.623982	0.185501	0.767855	0.0745816	-0.711269	0.113013	-0.345011	0.503017	-0.134439	0.799557
ENSDARG00000007682	ENSDARG00000007682	ppdpfa	turquoise	-0.316557	0.541025	0.633253	0.177091	0.106685	0.840579	0.149979	0.776718	0.127637	0.809584	-0.460702	0.357838	-0.358304	0.485543	-0.139249	0.792477
ENSDARG00000007760	ENSDARG00000007760	spg21	turquoise	-0.842593	0.0352154	0.959056	0.00248031	-0.553595	0.254437	0.655213	0.157824	0.427412	0.397921	-0.58114	0.226422	-0.307958	0.552667	-0.0760033	0.886215
ENSDARG00000007795	ENSDARG00000007795	cst3	turquoise	-0.926851	0.00783039	0.922592	0.00875605	-0.831055	0.0404028	0.61208	0.196535	0.736331	0.095117	-0.402938	0.428304	-0.479077	0.336362	-0.363207	0.479146
ENSDARG00000007823	ENSDARG00000007823	atf3	turquoise	-0.892164	0.016816	0.987229	0.000243599	-0.626865	0.182869	0.561639	0.246123	0.62842	0.181455	-0.584162	0.223429	-0.355973	0.488594	-0.250234	0.632483
ENSDARG00000007824	ENSDARG00000007824	camta1b	turquoise	0.959307	0.00245023	-0.869192	0.0245471	0.838924	0.0368285	-0.663486	0.150808	-0.848317	0.0327665	0.72107	0.105852	0.0899884	0.865382	0.00379099	0.994314
ENSDARG00000007836	ENSDARG00000007836	ctsla	turquoise	-0.845361	0.034021	0.9117	0.0113512	-0.617589	0.191396	0.837847	0.0373086	0.407837	0.422162	-0.645978	0.165812	-0.293688	0.572134	0.177543	0.736483
ENSDARG00000007988	ENSDARG00000007988	masp2	turquoise	-0.905028	0.0131013	0.977249	0.000770538	-0.621238	0.188023	0.723568	0.10406	0.571295	0.236286	-0.754256	0.0831649	-0.216131	0.680851	0.0679327	0.898258
ENSDARG00000007990	ENSDARG00000007990	wt1b	turquoise	-0.737318	0.0944399	0.879323	0.0209658	-0.408772	0.420994	0.339246	0.510653	0.344001	0.504353	-0.413216	0.415454	-0.174713	0.740597	-0.357643	0.486409
ENSDARG00000008014	ENSDARG00000008014	nudt17	turquoise	-0.898507	0.0149286	0.984512	0.000357968	-0.617448	0.191527	0.583846	0.223741	0.710541	0.113554	-0.720334	0.106383	-0.302379	0.560255	-0.133049	0.801604
ENSDARG00000008020	ENSDARG00000008020	med31	turquoise	-0.830437	0.0406898	0.960941	0.00225865	-0.544251	0.264229	0.647613	0.164386	0.448514	0.372342	-0.571716	0.235861	-0.377233	0.460992	-0.102918	0.846168
ENSDARG00000008030	ENSDARG00000008030	myl9b	turquoise	-0.485202	0.32931	0.673432	0.142556	-0.0978169	0.853743	0.0636207	0.904698	0.0681074	0.897997	-0.295104	0.570194	0.0497757	0.925398	-0.361645	0.481182
ENSDARG00000008034	ENSDARG00000008034	skib	turquoise	-0.82381	0.0438297	0.851199	0.0315651	-0.691338	0.128205	0.788992	0.0620888	0.82665	0.0424709	-0.776853	0.0691364	-0.51697	0.293627	0.154329	0.770344
ENSDARG00000008049	ENSDARG00000008049	si:dkey-42i9.4	turquoise	-0.808644	0.0514221	0.918244	0.00975286	-0.527479	0.282163	0.612062	0.196552	0.31923	0.537421	-0.484666	0.329926	-0.243511	0.641954	-0.115166	0.828015
ENSDARG00000008184	ENSDARG00000008184	mia3	turquoise	-0.762514	0.0779021	0.786595	0.0634531	-0.608625	0.199787	0.825343	0.0430935	0.744623	0.0894986	-0.869979	0.0242593	-0.389875	0.444818	0.368059	0.472842
ENSDARG00000008186	ENSDARG00000008186	syk	turquoise	-0.891761	0.0169393	0.952784	0.00329134	-0.674107	0.142004	0.483272	0.331526	0.765829	0.0758336	-0.560768	0.247018	-0.377418	0.460753	-0.350901	0.495252
ENSDARG00000008363	ENSDARG00000008363	mcl1b	turquoise	-0.855824	0.0296815	0.899126	0.0147502	-0.653717	0.159106	0.753815	0.0834503	0.337715	0.512685	-0.4794	0.335989	-0.237726	0.650128	-0.000620396	0.999069
ENSDARG00000008383	ENSDARG00000008383	arpc1a	turquoise	-0.911825	0.0113195	0.99151	0.00010781	-0.642705	0.168683	0.649573	0.162682	0.704082	0.118395	-0.737172	0.0945399	-0.324986	0.529683	-0.0726727	0.891183
ENSDARG00000008384	ENSDARG00000008384	hdac6	turquoise	-0.93635	0.00594809	0.964601	0.00185748	-0.717641	0.108334	0.632031	0.17819	0.820228	0.0455721	-0.746537	0.0882236	-0.293712	0.5721	-0.0940362	0.859361
ENSDARG00000008457	ENSDARG00000008457	faah2a	turquoise	-0.991824	9.99919e-05	0.962556	0.00207686	-0.851588	0.0314049	0.723942	0.103793	0.76876	0.0740258	-0.619699	0.189442	-0.298563	0.565463	-0.12123	0.819046
ENSDARG00000008542	ENSDARG00000008542	yod1	turquoise	-0.951925	0.00341121	0.995333	3.26195e-05	-0.723811	0.103886	0.67607	0.140401	0.725562	0.10264	-0.69043	0.128917	-0.317354	0.539949	-0.107884	0.838802
ENSDARG00000008548	ENSDARG00000008548	arhgap12a	turquoise	-0.812443	0.0494676	0.955075	0.002982	-0.509113	0.30231	0.54472	0.263734	0.448272	0.372632	-0.52598	0.283787	-0.354317	0.490765	-0.217009	0.679596
ENSDARG00000008678	ENSDARG00000008678	snx3	turquoise	-0.924721	0.0082871	0.988433	0.00019992	-0.676456	0.140087	0.754006	0.0833265	0.649745	0.162534	-0.74296	0.090613	-0.322624	0.532854	0.0357981	0.946326
ENSDARG00000008697	ENSDARG00000008697	epas1a	turquoise	-0.87413	0.0227678	0.852462	0.0310455	-0.710401	0.113657	0.923826	0.00848274	0.487328	0.326875	-0.73954	0.0929243	-0.149796	0.776986	0.36302	0.47939
ENSDARG00000008735	ENSDARG00000008735	atp6ap2	turquoise	-0.898202	0.0150167	0.975807	0.000870896	-0.628581	0.181309	0.717246	0.108622	0.502846	0.309305	-0.653971	0.158888	-0.255585	0.624971	-0.0043352	0.993497
ENSDARG00000008757	ENSDARG00000008757	entpd6	turquoise	-0.894115	0.0162238	0.949019	0.00383237	-0.719285	0.107141	0.830082	0.0408554	0.676028	0.140435	-0.68169	0.135856	-0.506124	0.305639	0.0584962	0.912356
ENSDARG00000008867	ENSDARG00000008867	rap1b	turquoise	-0.830045	0.0408726	0.953776	0.00315557	-0.512133	0.298961	0.477894	0.33773	0.484865	0.329697	-0.551771	0.256337	-0.237748	0.650097	-0.252198	0.629723
ENSDARG00000008890	ENSDARG00000008890	ctns	turquoise	-0.845243	0.0340715	0.882797	0.0197999	-0.639114	0.171858	0.429854	0.394932	0.88215	0.0200145	-0.667819	0.147189	-0.313916	0.544594	-0.26493	0.611902
ENSDARG00000008969	ENSDARG00000008969	fgb	turquoise	-0.850842	0.0317131	0.883734	0.019491	-0.670851	0.144679	0.911667	0.0113595	0.583776	0.22381	-0.776652	0.0692557	-0.357882	0.486096	0.313574	0.545055
ENSDARG00000009014	ENSDARG00000009014	col11a1b	turquoise	0.923195	0.00862194	-0.881701	0.0201641	0.831086	0.0403883	-0.883888	0.0194404	-0.79243	0.0601564	0.741957	0.0912881	0.387002	0.448477	-0.181456	0.730803
ENSDARG00000009040	ENSDARG00000009040	si:ch73-141c7.1	turquoise	-0.857954	0.0288327	0.786521	0.0634952	-0.87285	0.0232228	0.659535	0.154142	0.928614	0.00746208	-0.494774	0.3184	-0.545672	0.262731	-0.183621	0.727665
ENSDARG00000009074	ENSDARG00000009074	cbr4	turquoise	-0.910162	0.0117438	0.953492	0.00319425	-0.708092	0.115379	0.495352	0.317745	0.700096	0.121427	-0.489333	0.324585	-0.336053	0.514896	-0.382567	0.454146
ENSDARG00000009106	ENSDARG00000009106	serinc1	turquoise	-0.940143	0.0052671	0.934717	0.00625362	-0.786661	0.0634156	0.89246	0.0167255	0.653134	0.159608	-0.719368	0.107081	-0.330054	0.522896	0.169994	0.747466
ENSDARG00000009134	ENSDARG00000009134	hlx1	turquoise	-0.727564	0.101222	0.806788	0.0523898	-0.486097	0.328285	0.861608	0.0274034	0.319106	0.537588	-0.732885	0.0974966	-0.228732	0.662886	0.415848	0.412184
ENSDARG00000009153	ENSDARG00000009153	pla2g1b	turquoise	-0.910887	0.0115578	0.834744	0.0387077	-0.866006	0.0257289	0.545785	0.262612	0.914996	0.0105315	-0.498013	0.314739	-0.351843	0.494014	-0.302186	0.560518
ENSDARG00000009253	ENSDARG00000009253	zgc:56576	turquoise	-0.919104	0.00955145	0.955443	0.00293371	-0.697747	0.123229	0.549363	0.258854	0.821246	0.0450734	-0.687015	0.131609	-0.299837	0.563722	-0.203928	0.698348
ENSDARG00000009267	ENSDARG00000009267	zgc:136439	turquoise	-0.926964	0.00780656	0.915869	0.0103194	-0.783772	0.0650768	0.554866	0.253116	0.886507	0.01859	-0.612015	0.196596	-0.347504	0.499726	-0.2575	0.622287
ENSDARG00000009313	ENSDARG00000009313	NAPSA	turquoise	-0.877402	0.021624	0.940148	0.00526613	-0.707851	0.115559	0.524155	0.28577	0.673891	0.14218	-0.406384	0.423981	-0.49743	0.315396	-0.420753	0.406114
ENSDARG00000009315	ENSDARG00000009315	clgn	turquoise	-0.924692	0.00829347	0.984703	0.000349229	-0.701526	0.120335	0.707353	0.115932	0.755947	0.0820747	-0.727463	0.101293	-0.406088	0.424352	-0.0538776	0.919262
ENSDARG00000009361	ENSDARG00000009361	zmp:0000001043	turquoise	-0.841821	0.0355519	0.974919	0.00093567	-0.527349	0.282304	0.564243	0.243455	0.521973	0.288148	-0.617444	0.191531	-0.320315	0.535959	-0.163225	0.757337
ENSDARG00000009430	ENSDARG00000009430	tmem30c	turquoise	-0.937356	0.00576356	0.941896	0.00496611	-0.752004	0.0846269	0.789637	0.0617243	0.794795	0.0588431	-0.814154	0.0485988	-0.306267	0.554964	0.120202	0.820565
ENSDARG00000009459	ENSDARG00000009459	slc35e4	turquoise	-0.747271	0.087737	0.874281	0.0227144	-0.44397	0.3778	0.478107	0.337484	0.244457	0.640619	-0.402153	0.42929	-0.179544	0.733578	-0.219857	0.675528
ENSDARG00000009470	ENSDARG00000009470	hnf1a	turquoise	-0.900855	0.0142574	0.991203	0.000115752	-0.633414	0.176946	0.675101	0.141191	0.683947	0.134049	-0.731091	0.0987453	-0.369141	0.471439	-0.0525579	0.921236
ENSDARG00000009473	ENSDARG00000009473	ppardb	turquoise	-0.838497	0.0370187	0.887382	0.0183101	-0.634125	0.176308	0.879755	0.0208189	0.61095	0.197597	-0.820316	0.0455291	-0.353486	0.491856	0.316327	0.541335
ENSDARG00000009480	ENSDARG00000009480	pdcl	turquoise	-0.224277	0.669225	0.302828	0.559644	-0.0691679	0.896414	0.535051	0.27401	-0.413479	0.415127	-0.167093	0.751693	0.0469809	0.929581	0.424033	0.402072
ENSDARG00000009702	ENSDARG00000009702	ascl1b	turquoise	-0.946196	0.00426448	0.944345	0.00456001	-0.804603	0.0535399	0.87478	0.0225382	0.624029	0.185459	-0.636504	0.17418	-0.371625	0.468224	0.0794145	0.881129
ENSDARG00000009748	ENSDARG00000009748	dffb	turquoise	-0.870604	0.0240318	0.965342	0.00178092	-0.60206	0.206026	0.772353	0.0718359	0.556268	0.251662	-0.739648	0.0928509	-0.346186	0.501465	0.104132	0.844366
ENSDARG00000009753	ENSDARG00000009753	sf3b6	turquoise	-0.819834	0.0457654	0.957972	0.00261238	-0.489004	0.324961	0.555853	0.252092	0.448683	0.372139	-0.609374	0.19908	-0.259173	0.619945	-0.130355	0.805576
ENSDARG00000009783	ENSDARG00000009783	dirc2	turquoise	-0.925811	0.00805185	0.955133	0.00297442	-0.767707	0.0746729	0.802962	0.0544109	0.764754	0.0765015	-0.696992	0.123811	-0.482165	0.3328	0.0131921	0.980213
ENSDARG00000009901	ENSDARG00000009901	slc38a5a	turquoise	-0.806581	0.0524983	0.927466	0.0077009	-0.525159	0.284679	0.36125	0.481697	0.6171	0.19185	-0.489654	0.324219	-0.343931	0.504445	-0.427061	0.398353
ENSDARG00000009939	ENSDARG00000009939	micu2	turquoise	-0.946042	0.0042887	0.934563	0.00628285	-0.790562	0.0612032	0.778766	0.0680025	0.836549	0.037891	-0.778031	0.068437	-0.339641	0.510129	0.0683209	0.897678
ENSDARG00000009950	ENSDARG00000009950	edf1	turquoise	-0.891247	0.0170977	0.981796	0.00049406	-0.621809	0.187497	0.556775	0.251137	0.722452	0.104859	-0.675147	0.141154	-0.352316	0.493391	-0.199412	0.704847
ENSDARG00000010155	ENSDARG00000010155	abi1a	turquoise	-0.948146	0.00396359	0.99374	5.86671e-05	-0.716495	0.109169	0.666664	0.148151	0.631116	0.179015	-0.616379	0.19252	-0.283473	0.58618	-0.145341	0.783524
ENSDARG00000010267	ENSDARG00000010267	dpydb	turquoise	-0.915258	0.0104675	0.882354	0.0199466	-0.725477	0.1027	0.846674	0.0334612	0.651517	0.161001	-0.850539	0.0318386	-0.0828206	0.876053	0.318469	0.538447
ENSDARG00000010279	ENSDARG00000010279	scamp2	turquoise	-0.858205	0.0287334	0.859082	0.0283878	-0.688989	0.13005	0.551749	0.25636	0.932389	0.00670235	-0.766254	0.0755704	-0.303916	0.558162	-0.0761037	0.886065
ENSDARG00000010301	ENSDARG00000010301	b4galt6	turquoise	-0.743235	0.0904286	0.800177	0.0559044	-0.577569	0.229981	0.77944	0.0676052	0.187073	0.722664	-0.378084	0.459897	-0.307093	0.55384	0.0764219	0.88559
ENSDARG00000010408	ENSDARG00000010408	igsf9b	turquoise	-0.92343	0.00856991	0.981105	0.000532186	-0.709238	0.114523	0.623479	0.185963	0.781102	0.0666303	-0.657012	0.156286	-0.415915	0.412101	-0.189686	0.718883
ENSDARG00000010442	ENSDARG00000010442	rnf11a	turquoise	-0.975884	0.00086533	0.973341	0.00105661	-0.831077	0.0403923	0.73526	0.0958532	0.716901	0.108873	-0.569284	0.238322	-0.379962	0.457485	-0.153382	0.771732
ENSDARG00000010445	ENSDARG00000010445	trabd	turquoise	-0.837882	0.0372927	0.943528	0.00469355	-0.585681	0.221929	0.635398	0.175168	0.402679	0.428628	-0.470571	0.346244	-0.355667	0.488995	-0.171252	0.745633
ENSDARG00000010572	ENSDARG00000010572	slc25a25a	turquoise	-0.910503	0.0116561	0.90653	0.0126967	-0.812063	0.0496616	0.873649	0.0229385	0.555152	0.252819	-0.506882	0.304794	-0.450293	0.370212	0.0181851	0.972725
ENSDARG00000010625	ENSDARG00000010625	clic2	turquoise	-0.783519	0.0652237	0.925611	0.00809478	-0.46523	0.352502	0.38455	0.451608	0.472775	0.343674	-0.479013	0.336436	-0.275513	0.597187	-0.360001	0.483326
ENSDARG00000010655	ENSDARG00000010655	ppm1k	turquoise	-0.929181	0.00734532	0.940457	0.00521246	-0.7196	0.106913	0.844534	0.0343756	0.545533	0.262878	-0.723342	0.104222	-0.19107	0.716883	0.177684	0.736279
ENSDARG00000010729	ENSDARG00000010729	CABZ01073795.1	turquoise	-0.903375	0.0135535	0.968221	0.00149879	-0.662002	0.152057	0.611839	0.196762	0.507285	0.304344	-0.508929	0.302515	-0.269634	0.60535	-0.214438	0.683273
ENSDARG00000010767	ENSDARG00000010767	epha4l	turquoise	-0.824049	0.0437143	0.934843	0.00622978	-0.525181	0.284655	0.415982	0.412018	0.491153	0.322511	-0.482196	0.332764	-0.226164	0.666539	-0.347517	0.499709
ENSDARG00000011371	ENSDARG00000011371	zgc:64106	turquoise	-0.858923	0.0284503	0.882752	0.0198148	-0.668828	0.146352	0.410471	0.418873	0.870243	0.0241629	-0.609017	0.199417	-0.300756	0.562469	-0.329471	0.523675
ENSDARG00000011422	ENSDARG00000011422	ryr1a	turquoise	-0.2302	0.6608	0.382476	0.454261	-0.00831001	0.987535	0.616984	0.191958	0.134275	0.799799	-0.715367	0.109994	-0.267549	0.608252	0.699644	0.121772
ENSDARG00000011449	ENSDARG00000011449	fes	turquoise	-0.867409	0.0252052	0.938711	0.00551949	-0.639823	0.171229	0.435579	0.387953	0.760528	0.0791537	-0.54924	0.258983	-0.371962	0.467789	-0.381812	0.455113
ENSDARG00000011488	ENSDARG00000011488	sirt2	turquoise	-0.929102	0.0073617	0.985018	0.000335022	-0.737512	0.0943074	0.699709	0.121722	0.734983	0.0960443	-0.622705	0.186673	-0.475441	0.340574	-0.152226	0.773424
ENSDARG00000011515	ENSDARG00000011515	orai1a	turquoise	-0.951729	0.00343893	0.98605	0.000290535	-0.703484	0.118848	0.638656	0.172264	0.677671	0.1391	-0.690014	0.129243	-0.197048	0.708253	-0.105012	0.843061
ENSDARG00000011533	ENSDARG00000011533	sema6dl	turquoise	-0.797226	0.0575069	0.927987	0.00759202	-0.492214	0.321304	0.548327	0.259941	0.349666	0.496877	-0.49195	0.321604	-0.259611	0.619332	-0.178469	0.735139
ENSDARG00000011537	ENSDARG00000011537	ugt2a5	turquoise	-0.987742	0.000224454	0.905617	0.0129419	-0.901035	0.0142064	0.758822	0.0802363	0.656743	0.156516	-0.516173	0.294503	-0.193233	0.713758	-0.0890357	0.866799
ENSDARG00000011661	ENSDARG00000011661	twf1b	turquoise	-0.904596	0.0132187	0.908885	0.0120747	-0.753765	0.0834828	0.675405	0.140943	0.903862	0.0134196	-0.745991	0.0885865	-0.406628	0.423675	-0.0428478	0.935768
ENSDARG00000011665	ENSDARG00000011665	aldoaa	turquoise	-0.889646	0.017595	0.985923	0.000295854	-0.614411	0.194354	0.551227	0.256905	0.618936	0.190148	-0.594582	0.213227	-0.32612	0.528161	-0.242448	0.643453
ENSDARG00000011693	ENSDARG00000011693	ttc36	turquoise	0.850779	0.0317389	-0.857109	0.029168	0.80146	0.0552141	-0.632613	0.177666	-0.839069	0.0367644	0.439996	0.382597	0.661104	0.152815	0.29439	0.571171
ENSDARG00000011809	ENSDARG00000011809	mical1	turquoise	-0.875606	0.0222482	0.989096	0.000177705	-0.578603	0.228949	0.603163	0.204972	0.586975	0.220655	-0.655767	0.157349	-0.329011	0.524291	-0.136954	0.795853
ENSDARG00000011876	ENSDARG00000011876	ednraa	turquoise	-0.764547	0.0766307	0.93373	0.006442	-0.422182	0.404351	0.406123	0.424308	0.510189	0.301116	-0.563225	0.244497	-0.329334	0.523859	-0.289178	0.578324
ENSDARG00000011890	ENSDARG00000011890	cry4	turquoise	-0.795322	0.0585523	0.87403	0.0228033	-0.553177	0.254872	0.825536	0.0430012	0.323964	0.531054	-0.637222	0.17354	-0.252936	0.628687	0.230461	0.660429
ENSDARG00000011925	ENSDARG00000011925	spns1	turquoise	-0.955213	0.00296385	0.970557	0.00128757	-0.767759	0.0746407	0.800909	0.0555102	0.745274	0.0890643	-0.751843	0.0847319	-0.342306	0.506595	0.0600728	0.909999
ENSDARG00000011948	ENSDARG00000011948	insra	turquoise	-0.828292	0.0416942	0.899073	0.0147652	-0.577448	0.230102	0.83277	0.0396105	0.39703	0.435748	-0.704454	0.118113	-0.232712	0.657234	0.246953	0.6371
ENSDARG00000012040	ENSDARG00000012040	rnf19a	turquoise	-0.93968	0.00534806	0.989307	0.000170902	-0.722918	0.104526	0.715565	0.109849	0.749212	0.0864556	-0.714846	0.110376	-0.385951	0.449819	-0.0606632	0.909117
ENSDARG00000012078	ENSDARG00000012078	meis1b	turquoise	-0.720506	0.106259	0.888022	0.0181065	-0.367982	0.472941	0.395277	0.437964	0.310496	0.549223	-0.47069	0.346105	-0.206279	0.69497	-0.258356	0.621089
ENSDARG00000012135	ENSDARG00000012135	fbxl2	turquoise	-0.934107	0.00636971	0.996039	2.35088e-05	-0.693706	0.126356	0.637142	0.173611	0.713995	0.111001	-0.666139	0.148588	-0.343685	0.50477	-0.1573	0.765996
ENSDARG00000012194	ENSDARG00000012194	scp2a	turquoise	-0.581296	0.226268	0.624223	0.185281	-0.491483	0.322135	0.855208	0.0299293	0.558033	0.249836	-0.732863	0.0975115	-0.519583	0.290761	0.488749	0.325251
ENSDARG00000012407	ENSDARG00000012407	mgat1a	turquoise	-0.858853	0.0284778	0.969714	0.00136194	-0.573357	0.234206	0.682558	0.13516	0.66834	0.146757	-0.780711	0.066859	-0.381775	0.455159	0.026023	0.960974
ENSDARG00000012513	ENSDARG00000012513	sdcbp2	turquoise	-0.774919	0.0702908	0.91043	0.011675	-0.451136	0.369205	0.371338	0.468595	0.422089	0.404466	-0.462565	0.355639	-0.208271	0.69211	-0.348755	0.498077
ENSDARG00000012591	ENSDARG00000012591	pdcd10b	turquoise	-0.832664	0.0396591	0.933392	0.00650717	-0.57644	0.23111	0.689998	0.129256	0.742068	0.0912136	-0.813657	0.0488504	-0.435296	0.388297	0.0680536	0.898077
ENSDARG00000012609	ENSDARG00000012609	hpx	turquoise	-0.875164	0.0224033	0.888092	0.0180844	-0.712869	0.11183	0.748713	0.0867839	0.862273	0.0271469	-0.821892	0.0447585	-0.395319	0.437911	0.120303	0.820417
ENSDARG00000012627	ENSDARG00000012627	cdc34b	turquoise	-0.92564	0.00808857	0.990793	0.000126762	-0.68984	0.12938	0.678859	0.138137	0.742237	0.0910998	-0.715487	0.109906	-0.382912	0.453704	-0.0866011	0.870423
ENSDARG00000012656	ENSDARG00000012656	atf6	turquoise	-0.928392	0.007508	0.894398	0.0161389	-0.846202	0.0336618	0.745857	0.0886753	0.895293	0.0158714	-0.660161	0.153611	-0.461417	0.356993	-0.0539628	0.919134
ENSDARG00000012688	ENSDARG00000012688	eif1b	turquoise	-0.831365	0.0402586	0.952944	0.00326931	-0.525303	0.284523	0.447278	0.373823	0.527282	0.282376	-0.530219	0.279203	-0.272195	0.601791	-0.312131	0.547008
ENSDARG00000012694	ENSDARG00000012694	c3a.1	turquoise	-0.929742	0.00723082	0.917276	0.00998193	-0.705245	0.117517	0.672281	0.143501	0.78053	0.0669653	-0.844409	0.0344293	-0.0892412	0.866494	0.0967012	0.8554
ENSDARG00000012747	ENSDARG00000012747	rer1	turquoise	-0.855219	0.0299248	0.982291	0.000467632	-0.555265	0.252702	0.633286	0.177061	0.606214	0.202069	-0.70212	0.119883	-0.380882	0.456304	-0.0733279	0.890205
ENSDARG00000012874	ENSDARG00000012874	snap23.1	turquoise	-0.838704	0.0369266	0.811247	0.050079	-0.753659	0.0835513	0.80257	0.05462	0.872438	0.0233702	-0.780931	0.0667303	-0.440267	0.38227	0.1929	0.714239
ENSDARG00000012899	ENSDARG00000012899	ddx49	turquoise	0.939443	0.00538966	-0.880542	0.0205529	0.819387	0.0459856	-0.749909	0.0859972	-0.882292	0.0199674	0.786905	0.063276	0.242768	0.643001	-0.0937176	0.859835
ENSDARG00000012987	ENSDARG00000012987	gpia	turquoise	-0.843893	0.034652	0.967232	0.00159301	-0.548662	0.259589	0.633767	0.176629	0.676298	0.140215	-0.764515	0.0766508	-0.395059	0.43824	-0.0271815	0.959238
ENSDARG00000013087	ENSDARG00000013087	ndrg3a	turquoise	-0.416964	0.410801	0.560044	0.247763	-0.121832	0.818156	0.303597	0.558595	-0.234432	0.654794	-0.166342	0.752789	0.0648576	0.90285	-0.0724788	0.891472
ENSDARG00000013161	ENSDARG00000013161	ERAS	turquoise	-0.926161	0.00797704	0.96555	0.00175974	-0.723876	0.10384	0.831555	0.0401709	0.671232	0.144365	-0.746217	0.0884361	-0.371591	0.468269	0.110205	0.835361
ENSDARG00000013207	ENSDARG00000013207	zeb1b	turquoise	-0.913993	0.0107776	0.915306	0.0104558	-0.715346	0.11001	0.497018	0.315861	0.847696	0.0330282	-0.670468	0.144995	-0.210644	0.688707	-0.226621	0.665888
ENSDARG00000013252	ENSDARG00000013252	si:dkey-202l16.5	turquoise	-0.888282	0.0180242	0.965756	0.00173893	-0.618367	0.190674	0.612363	0.19627	0.472964	0.343454	-0.551332	0.256795	-0.222875	0.671223	-0.157287	0.766015
ENSDARG00000013360	ENSDARG00000013360	sh3gl3a	turquoise	-0.860228	0.0279391	0.974285	0.000983403	-0.613711	0.195008	0.666974	0.147892	0.5418	0.266821	-0.555247	0.25272	-0.468916	0.348179	-0.155544	0.768565
ENSDARG00000013500	ENSDARG00000013500	abca2	turquoise	0.517003	0.293591	-0.699499	0.121884	0.224875	0.668373	-0.667539	0.147422	-0.398098	0.434399	0.801258	0.0553227	0.423053	0.403278	-0.400761	0.431042
ENSDARG00000013539	ENSDARG00000013539	ikzf1	turquoise	-0.915533	0.0104006	0.929131	0.00735567	-0.794407	0.0590576	0.826604	0.0424926	0.553726	0.254301	-0.489083	0.324871	-0.454758	0.364886	-0.0559226	0.916204
ENSDARG00000013628	ENSDARG00000013628	cd164	turquoise	-0.869854	0.0243048	0.966383	0.00167612	-0.663026	0.151195	0.682236	0.135418	0.699135	0.122162	-0.609499	0.198963	-0.56562	0.242048	-0.149024	0.778119
ENSDARG00000013655	ENSDARG00000013655	tpd52l2b	turquoise	-0.829458	0.0411467	0.941048	0.00511052	-0.574617	0.232939	0.516748	0.293872	0.780351	0.0670702	-0.675548	0.140826	-0.469199	0.347848	-0.215627	0.681573
ENSDARG00000013681	ENSDARG00000013681	si:dkey-42i9.6	turquoise	-0.856977	0.0292207	0.978305	0.000700876	-0.580048	0.227508	0.614015	0.194724	0.525034	0.284814	-0.567754	0.239875	-0.395739	0.437379	-0.179008	0.734355
ENSDARG00000013771	ENSDARG00000013771	ctss2.2	turquoise	-0.82455	0.0434736	0.947055	0.00413051	-0.53606	0.272931	0.50436	0.307609	0.445085	0.376458	-0.472355	0.344163	-0.308166	0.552384	-0.286964	0.58137
ENSDARG00000013777	ENSDARG00000013777	ppp1r13l	turquoise	-0.874473	0.0226466	0.885631	0.0188723	-0.718193	0.107933	0.931447	0.00688824	0.538928	0.269872	-0.708586	0.115009	-0.333103	0.518825	0.28117	0.589359
ENSDARG00000013794	ENSDARG00000013794	klf11b	turquoise	-0.815178	0.048082	0.830868	0.0404896	-0.676028	0.140435	0.365185	0.476574	0.899713	0.0145819	-0.518433	0.292021	-0.395835	0.437259	-0.412055	0.416899
ENSDARG00000013822	ENSDARG00000013822	anapc16	turquoise	-0.865586	0.0258866	0.969971	0.00133907	-0.600679	0.207349	0.750679	0.0854922	0.530823	0.278552	-0.679064	0.137972	-0.385186	0.450795	0.034923	0.947637
ENSDARG00000013853	ENSDARG00000013853	lmo4a	turquoise	-0.815145	0.0480989	0.837101	0.0376427	-0.672431	0.143378	0.844982	0.0341833	0.764478	0.0766735	-0.821415	0.044991	-0.448405	0.372472	0.278394	0.593198
ENSDARG00000013856	ENSDARG00000013856	amy2a	turquoise	0.874234	0.0227311	-0.896707	0.0154532	0.738121	0.093891	-0.845447	0.0339842	-0.772588	0.0716936	0.747663	0.0874775	0.501339	0.310995	-0.146416	0.781946
ENSDARG00000013976	ENSDARG00000013976	anxa13	turquoise	-0.859302	0.0283014	0.969974	0.00133882	-0.567948	0.239678	0.655534	0.157548	0.463674	0.354332	-0.609419	0.199038	-0.2952	0.570063	-0.0734668	0.889998
ENSDARG00000013979	ENSDARG00000013979	ndfip1	turquoise	-0.934743	0.0062488	0.973711	0.00102754	-0.725187	0.102906	0.656262	0.156926	0.812921	0.0492239	-0.719743	0.10681	-0.368469	0.47231	-0.109464	0.83646
ENSDARG00000013990	ENSDARG00000013990	ube2q2	turquoise	-0.875179	0.0223979	0.980698	0.000555252	-0.596444	0.211425	0.671948	0.143775	0.677047	0.139607	-0.752896	0.0840464	-0.3872	0.448226	-0.0222882	0.966573
ENSDARG00000013997	ENSDARG00000013997	ern1	turquoise	-0.893294	0.0164718	0.872936	0.0231922	-0.775777	0.0697771	0.841033	0.035897	0.409202	0.420457	-0.460342	0.358264	-0.262863	0.614787	0.0453018	0.932094
ENSDARG00000014181	ENSDARG00000014181	foxp1b	turquoise	-0.889222	0.0177278	0.986231	0.000283061	-0.657174	0.156148	0.657737	0.155669	0.66415	0.150252	-0.60643	0.201865	-0.487848	0.326281	-0.173861	0.741836
ENSDARG00000014427	ENSDARG00000014427	mxe	turquoise	-0.790177	0.06142	0.832674	0.0396544	-0.504011	0.308	0.660744	0.153118	0.244457	0.640619	-0.619182	0.18992	0.089567	0.866009	0.171654	0.745048
ENSDARG00000014463	ENSDARG00000014463	usf1l	turquoise	-0.858752	0.0285175	0.966902	0.00162508	-0.573685	0.233876	0.67766	0.139109	0.682836	0.134938	-0.791877	0.0604653	-0.374874	0.464029	0.0302033	0.954709
ENSDARG00000014474	ENSDARG00000014474	yipf1	turquoise	-0.8471	0.0332804	0.937282	0.00577694	-0.637464	0.173324	0.726269	0.102138	0.749289	0.0864045	-0.730165	0.099393	-0.541469	0.267173	0.00730413	0.989044
ENSDARG00000014531	ENSDARG00000014531	atg4a	turquoise	-0.870036	0.0242382	0.934855	0.00622767	-0.644087	0.167469	0.621187	0.188069	0.840867	0.0359699	-0.777511	0.0687455	-0.405129	0.425553	-0.0559619	0.916145
ENSDARG00000014556	ENSDARG00000014556	serpinb1l3	turquoise	-0.917882	0.00983824	0.927376	0.0077199	-0.755819	0.0821573	0.650388	0.161976	0.892672	0.0166608	-0.722199	0.105041	-0.39519	0.438074	-0.0975152	0.854191
ENSDARG00000014571	ENSDARG00000014571	ctnnb1	turquoise	-0.887775	0.0181851	0.990761	0.000127642	-0.61357	0.195139	0.605085	0.203142	0.588803	0.218861	-0.604088	0.204091	-0.356935	0.487335	-0.187057	0.722687
ENSDARG00000014587	ENSDARG00000014587	slc38a5b	turquoise	-0.901719	0.0140142	0.976537	0.000819297	-0.607481	0.200869	0.561308	0.246463	0.679453	0.137657	-0.727781	0.101069	-0.202703	0.70011	-0.119979	0.820895
ENSDARG00000014655	ENSDARG00000014655	itpr1a	turquoise	-0.859011	0.0284155	0.845516	0.0339547	-0.724541	0.103366	0.416854	0.410937	0.911568	0.0113846	-0.565833	0.241831	-0.315174	0.542893	-0.344662	0.503478
ENSDARG00000014731	ENSDARG00000014731	cacybp	turquoise	-0.896785	0.0154302	0.906925	0.0125913	-0.74231	0.0910504	0.608263	0.200129	0.913863	0.0108099	-0.703718	0.11867	-0.409946	0.419528	-0.135254	0.798356
ENSDARG00000014763	ENSDARG00000014763	arf2a	turquoise	-0.858476	0.0286264	0.973575	0.00103819	-0.552966	0.255091	0.497031	0.315847	0.619677	0.189463	-0.628403	0.18147	-0.295714	0.569358	-0.239079	0.648215
ENSDARG00000014790	ENSDARG00000014790	g3bp2	turquoise	-0.827696	0.0419753	0.934582	0.00627932	-0.530111	0.279318	0.553807	0.254216	0.374724	0.464224	-0.507434	0.304178	-0.200454	0.703347	-0.173801	0.741923
ENSDARG00000015149	ENSDARG00000015149	wasa	turquoise	-0.893226	0.0164925	0.933458	0.0064945	-0.722453	0.104859	0.508199	0.303327	0.822897	0.0442708	-0.538468	0.270362	-0.447128	0.374004	-0.358075	0.485844
ENSDARG00000015224	ENSDARG00000015224	cd2ap	turquoise	-0.941751	0.00499052	0.977081	0.000781889	-0.727894	0.100989	0.612146	0.196473	0.794771	0.0588563	-0.677874	0.138935	-0.330374	0.522469	-0.177051	0.737198
ENSDARG00000015228	ENSDARG00000015228	ero1a	turquoise	-0.943321	0.00472771	0.943051	0.00477249	-0.78307	0.0654835	0.588908	0.218758	0.855657	0.0297488	-0.625582	0.184039	-0.348443	0.498488	-0.233957	0.655468
ENSDARG00000015278	ENSDARG00000015278	plxnc1	turquoise	-0.888668	0.0179023	0.983604	0.000401044	-0.644944	0.166717	0.646278	0.16555	0.557362	0.25053	-0.54663	0.261722	-0.408701	0.421083	-0.192247	0.715183
ENSDARG00000015343	ENSDARG00000015343	pgd	turquoise	-0.859562	0.0281994	0.960543	0.00230463	-0.597961	0.209961	0.777487	0.0687593	0.553679	0.254349	-0.723983	0.103764	-0.388642	0.446387	0.0976033	0.85406
ENSDARG00000015355	ENSDARG00000015355	fosl1a	turquoise	-0.858557	0.0285942	0.960373	0.00232436	-0.580551	0.227008	0.593445	0.214332	0.445083	0.376461	-0.522187	0.287914	-0.279408	0.591795	-0.184921	0.725781
ENSDARG00000015374	ENSDARG00000015374	st3gal3a	turquoise	-0.894347	0.0161541	0.969854	0.00134945	-0.618792	0.190281	0.744617	0.0895029	0.513286	0.297687	-0.709451	0.114364	-0.234798	0.654275	0.0708135	0.893957
ENSDARG00000015540	ENSDARG00000015540	psen2	turquoise	-0.839211	0.036701	0.97453	0.000964857	-0.525021	0.284829	0.539334	0.26944	0.623621	0.185833	-0.675266	0.141057	-0.357488	0.486611	-0.167868	0.750563
ENSDARG00000015563	ENSDARG00000015563	LPIN3	turquoise	-0.886863	0.0184759	0.967064	0.00160935	-0.656013	0.157139	0.798885	0.0566038	0.614838	0.193955	-0.717693	0.108296	-0.42412	0.401965	0.0769699	0.884773
ENSDARG00000015575	ENSDARG00000015575	cyp3c1	turquoise	-0.904867	0.0131448	0.960538	0.00230517	-0.666109	0.148613	0.512908	0.298105	0.782862	0.0656045	-0.651837	0.160724	-0.308359	0.552121	-0.255078	0.625681
ENSDARG00000015887	ENSDARG00000015887	b2ml	turquoise	-0.924782	0.00827387	0.985174	0.000328077	-0.700246	0.121312	0.696081	0.124514	0.760052	0.0794548	-0.723922	0.103807	-0.403222	0.427946	-0.0676619	0.898662
ENSDARG00000015891	ENSDARG00000015891	ptprea	turquoise	-0.872317	0.0234135	0.91512	0.0105011	-0.700788	0.120898	0.530334	0.279079	0.879809	0.0208006	-0.622392	0.186961	-0.467522	0.349812	-0.267378	0.60849
ENSDARG00000015907	ENSDARG00000015907	dcbld1	turquoise	-0.909911	0.0118085	0.909896	0.0118123	-0.683269	0.134591	0.796647	0.0578241	0.683843	0.134132	-0.87849	0.0212501	-0.117724	0.82423	0.265998	0.610413
ENSDARG00000015917	ENSDARG00000015917	rnft1	turquoise	-0.805622	0.0530023	0.872582	0.0233186	-0.631006	0.179114	0.648959	0.163215	0.861166	0.0275744	-0.7448	0.0893806	-0.545387	0.263031	-0.0169964	0.974508
ENSDARG00000015955	ENSDARG00000015955	cldnc	turquoise	-0.82693	0.0423379	0.90917	0.0120005	-0.582609	0.224965	0.750041	0.0859105	0.330094	0.522842	-0.543448	0.265077	-0.266933	0.609111	0.0483182	0.927579
ENSDARG00000015970	ENSDARG00000015970	phip	turquoise	-0.852528	0.0310184	0.917328	0.00996952	-0.583105	0.224474	0.386637	0.448943	0.749831	0.0860482	-0.637271	0.173496	-0.201753	0.701477	-0.305674	0.55577
ENSDARG00000016058	ENSDARG00000016058	fibpa	turquoise	-0.930934	0.00699052	0.969474	0.00138356	-0.679715	0.137446	0.762697	0.0777876	0.560312	0.247486	-0.725202	0.102895	-0.180017	0.732891	0.0835986	0.874894
ENSDARG00000016074	ENSDARG00000016074	cryz	turquoise	-0.886953	0.0184469	0.844328	0.0344646	-0.77588	0.0697161	0.610817	0.197721	0.954794	0.00301919	-0.727445	0.101306	-0.315204	0.542852	-0.0619828	0.907145
ENSDARG00000016084	ENSDARG00000016084	spsb4a	turquoise	-0.85362	0.0305725	0.969087	0.00141862	-0.565046	0.242634	0.63485	0.175658	0.461896	0.356428	-0.580226	0.227331	-0.317709	0.539471	-0.115657	0.827288
ENSDARG00000016086	ENSDARG00000016086	smurf1	turquoise	-0.920104	0.00932008	0.98012	0.000588885	-0.667752	0.147245	0.545116	0.263317	0.656171	0.157004	-0.590757	0.21695	-0.260174	0.618545	-0.256836	0.623217
ENSDARG00000016153	ENSDARG00000016153	dag1	turquoise	-0.671699	0.14398	0.697237	0.123622	-0.550172	0.258007	0.766876	0.0751855	0.764636	0.0765753	-0.842374	0.0353106	-0.44435	0.377342	0.3761	0.46245
ENSDARG00000016256	ENSDARG00000016256	nudt3a	turquoise	-0.849423	0.0323029	0.905111	0.0130787	-0.549846	0.258348	0.634793	0.175709	0.697579	0.123358	-0.908789	0.0120996	-0.0955443	0.85712	0.171732	0.744935
ENSDARG00000016319	ENSDARG00000016319	c9	turquoise	-0.943662	0.00467151	0.882804	0.0197976	-0.814978	0.0481829	0.72685	0.101726	0.879446	0.020924	-0.786834	0.0633167	-0.206181	0.695111	0.076317	0.885747
ENSDARG00000016393	ENSDARG00000016393	arf2b	turquoise	-0.8329	0.0395505	0.959208	0.0024621	-0.502562	0.309623	0.467006	0.350417	0.550531	0.257632	-0.620374	0.188819	-0.232676	0.657285	-0.226631	0.665873
ENSDARG00000016404	ENSDARG00000016404	ptch1	turquoise	0.635172	0.17537	-0.775702	0.0698221	0.396244	0.436741	-0.692642	0.127185	-0.624832	0.184724	0.812883	0.0492437	0.528492	0.281067	-0.265592	0.610979
ENSDARG00000016412	ENSDARG00000016412	agt	turquoise	-0.977622	0.00074556	0.975883	0.000865425	-0.813898	0.0487281	0.79779	0.0571993	0.708749	0.114887	-0.663673	0.150652	-0.336246	0.51464	-0.015674	0.976491
ENSDARG00000016448	ENSDARG00000016448	vtg3	turquoise	0.258228	0.621267	-0.545055	0.263382	-0.145434	0.783387	-0.214841	0.682696	-0.273091	0.600546	0.695141	0.125242	0.313187	0.545579	-0.16148	0.759886
ENSDARG00000016457	ENSDARG00000016457	irf9	turquoise	-0.850029	0.0320503	0.962387	0.00209548	-0.558513	0.24934	0.701151	0.120621	0.454708	0.364945	-0.648667	0.163469	-0.302226	0.560464	0.00839774	0.987404
ENSDARG00000016464	ENSDARG00000016464	cdc42bpab	turquoise	-0.935004	0.00619945	0.8968	0.0154259	-0.842726	0.0351577	0.875215	0.0223855	0.792971	0.0598549	-0.717097	0.10873	-0.405386	0.425231	0.135992	0.79727
ENSDARG00000016479	ENSDARG00000016479	ugt5a1	turquoise	-0.77755	0.0687221	0.725461	0.102711	-0.75173	0.0848056	0.728136	0.100818	0.925296	0.00816269	-0.709623	0.114236	-0.481677	0.333363	0.132454	0.802482
ENSDARG00000016527	ENSDARG00000016527	helz2	turquoise	-0.880217	0.0206625	0.870652	0.0240143	-0.757998	0.0807612	0.923637	0.00852426	0.463635	0.354378	-0.581911	0.225657	-0.320499	0.535712	0.200882	0.70273
ENSDARG00000016607	ENSDARG00000016607	echdc2	turquoise	-0.802122	0.0548595	0.920226	0.00929199	-0.490431	0.323333	0.369683	0.470737	0.486398	0.32794	-0.482748	0.332129	-0.200764	0.7029	-0.365062	0.476732
ENSDARG00000016745	ENSDARG00000016745	slc35f6	turquoise	-0.913769	0.010833	0.981122	0.000531181	-0.694338	0.125865	0.754845	0.0827846	0.710584	0.113521	-0.720515	0.106252	-0.437426	0.38571	-0.00461596	0.993076
ENSDARG00000016774	ENSDARG00000016774	plekho2	turquoise	-0.838356	0.0370815	0.966102	0.00170414	-0.556755	0.251158	0.53221	0.277059	0.518945	0.29146	-0.513107	0.297884	-0.385832	0.44997	-0.277426	0.594537
ENSDARG00000016939	ENSDARG00000016939	itgb2	turquoise	-0.841816	0.035554	0.970789	0.00126745	-0.578835	0.228717	0.569818	0.237781	0.567524	0.240109	-0.52885	0.28068	-0.469097	0.347967	-0.260283	0.618392
ENSDARG00000016981	ENSDARG00000016981	bcar3	turquoise	-0.970027	0.00133407	0.961746	0.00216705	-0.781312	0.0665074	0.606377	0.201915	0.70788	0.115537	-0.584558	0.223037	-0.198882	0.70561	-0.215672	0.681508
ENSDARG00000017034	ENSDARG00000017034	sqrdl	turquoise	-0.839451	0.0365948	0.91938	0.00948732	-0.605259	0.202977	0.835394	0.0384126	0.601139	0.206908	-0.797389	0.057418	-0.391772	0.442408	0.232247	0.657893
ENSDARG00000017127	ENSDARG00000017127	pdzk1ip1	turquoise	-0.817315	0.0470121	0.9558	0.00288735	-0.4993	0.313288	0.492768	0.320675	0.477743	0.337906	-0.546229	0.262145	-0.296067	0.568876	-0.247419	0.636445
ENSDARG00000017180	ENSDARG00000017180	npc1	turquoise	-0.876159	0.0220551	0.969642	0.00136841	-0.60928	0.199169	0.731835	0.0982268	0.670441	0.145017	-0.78798	0.062663	-0.377556	0.460576	0.0696107	0.895753
ENSDARG00000017229	ENSDARG00000017229	megf10	turquoise	0.745125	0.0891637	-0.752246	0.0844693	0.726552	0.101937	-0.50357	0.308493	-0.427484	0.397834	0.0279598	0.958071	0.553608	0.254424	0.513097	0.297895
ENSDARG00000017312	ENSDARG00000017312	lmbrd2b	turquoise	-0.964494	0.00186866	0.944596	0.00451937	-0.859895	0.0280692	0.830016	0.0408859	0.732792	0.0975606	-0.599309	0.208664	-0.437279	0.385889	-0.0333385	0.950011
ENSDARG00000017354	ENSDARG00000017354	epha2a	turquoise	-0.716679	0.109035	0.857415	0.0290463	-0.407227	0.422926	0.394268	0.439242	0.243681	0.641713	-0.353498	0.49184	-0.192828	0.714343	-0.312495	0.546515
ENSDARG00000017366	ENSDARG00000017366	prdm4	turquoise	-0.887081	0.0184061	0.958037	0.00260441	-0.618968	0.190118	0.622981	0.18642	0.450805	0.3696	-0.550846	0.257303	-0.193824	0.712905	-0.132625	0.802229
ENSDARG00000017489	ENSDARG00000017489	zgc:123068	turquoise	-0.782949	0.0655542	0.830312	0.0407478	-0.591345	0.216376	0.802786	0.0545048	0.230438	0.660461	-0.477217	0.338515	-0.225426	0.667588	0.143424	0.786339
ENSDARG00000017602	ENSDARG00000017602	ccng2	turquoise	-0.903532	0.0135102	0.977308	0.000766533	-0.650262	0.162085	0.719363	0.107085	0.505845	0.305951	-0.615859	0.193004	-0.290839	0.576042	-0.0421705	0.936782
ENSDARG00000017636	ENSDARG00000017636	rnf167	turquoise	-0.956989	0.00273509	0.982963	0.000432906	-0.759614	0.0797324	0.68858	0.130372	0.788143	0.0625707	-0.69508	0.125289	-0.355682	0.488976	-0.107144	0.839899
ENSDARG00000017748	ENSDARG00000017748	arhgap29b	turquoise	-0.891247	0.0170976	0.987557	0.00023127	-0.617943	0.191067	0.614322	0.194437	0.553954	0.254064	-0.590046	0.217644	-0.322585	0.532907	-0.175498	0.739455
ENSDARG00000017757	ENSDARG00000017757	pik3cg	turquoise	-0.8068	0.0523838	0.898515	0.0149261	-0.469904	0.347023	0.410006	0.419453	0.422211	0.404316	-0.575413	0.23214	0.000350138	0.999475	-0.195052	0.711133
ENSDARG00000017773	ENSDARG00000017773	slc16a12a	turquoise	-0.790557	0.0612059	0.83119	0.0403402	-0.616899	0.192036	0.330391	0.522446	0.882567	0.0198762	-0.548129	0.260148	-0.380471	0.456831	-0.403961	0.427019
ENSDARG00000017794	ENSDARG00000017794	sdr16c5b	turquoise	-0.945539	0.00436822	0.928344	0.00751796	-0.789114	0.0620199	0.583057	0.224521	0.870992	0.023891	-0.650458	0.161916	-0.290534	0.576462	-0.20454	0.697469
ENSDARG00000017809	ENSDARG00000017809	stard3	turquoise	-0.936789	0.00586712	0.985041	0.000333962	-0.720369	0.106358	0.778076	0.0684102	0.694752	0.125544	-0.729682	0.0997315	-0.372604	0.466959	0.0260519	0.960931
ENSDARG00000017982	ENSDARG00000017982	cyp39a1	turquoise	0.780475	0.0669974	-0.850103	0.0320197	0.563572	0.244141	-0.750359	0.085702	-0.752802	0.0841077	0.879749	0.0208211	0.402831	0.428438	-0.254363	0.626684
ENSDARG00000017988	ENSDARG00000017988	dse	turquoise	-0.938083	0.0056318	0.98662	0.000267349	-0.732722	0.0976095	0.776207	0.069521	0.690552	0.128821	-0.693397	0.126597	-0.405415	0.425195	-0.0103443	0.984484
ENSDARG00000018069	ENSDARG00000018069	rdh12	turquoise	-0.919154	0.00953998	0.925907	0.00803123	-0.793758	0.0594174	0.726194	0.102191	0.867833	0.0250479	-0.673442	0.142548	-0.496319	0.316651	-0.0781736	0.882978
ENSDARG00000018073	ENSDARG00000018073	mrps22	turquoise	-0.818562	0.046393	0.952457	0.00333682	-0.52946	0.280021	0.589428	0.218249	0.704618	0.11799	-0.740493	0.092278	-0.448743	0.372067	-0.0814415	0.878108
ENSDARG00000018174	ENSDARG00000018174	gnai2a	turquoise	-0.899392	0.0146739	0.990139	0.000145386	-0.639464	0.171547	0.586039	0.221577	0.618137	0.190887	-0.582727	0.224848	-0.357121	0.487091	-0.232036	0.658192
ENSDARG00000018178	ENSDARG00000018178	pgm2	turquoise	-0.704034	0.118431	0.862894	0.0269086	-0.40374	0.427296	0.364081	0.478009	0.290521	0.576479	-0.321543	0.534307	-0.302842	0.559625	-0.392368	0.441651
ENSDARG00000018283	ENSDARG00000018283	cyba	turquoise	-0.732927	0.0974673	0.888139	0.0180694	-0.412383	0.416491	0.342965	0.505723	0.371582	0.46828	-0.398204	0.434265	-0.263261	0.614232	-0.391146	0.443203
ENSDARG00000018404	ENSDARG00000018404	krt18	turquoise	-0.96825	0.00149606	0.937901	0.00566469	-0.777751	0.0686028	0.652309	0.160318	0.795177	0.0586325	-0.739778	0.0927626	-0.131043	0.80456	-0.0434368	0.934886
ENSDARG00000018529	ENSDARG00000018529	lipf	turquoise	-0.908865	0.01208	0.962906	0.00203839	-0.673732	0.14231	0.505397	0.30645	0.760715	0.0790357	-0.616728	0.192195	-0.305656	0.555794	-0.287327	0.580869
ENSDARG00000018569	ENSDARG00000018569	tnfrsf1a	turquoise	-0.933277	0.00652947	0.995712	2.75462e-05	-0.694724	0.125566	0.623546	0.185902	0.674793	0.141443	-0.618177	0.190851	-0.336399	0.514436	-0.196848	0.708541
ENSDARG00000018587	ENSDARG00000018587	zgc:152658	turquoise	-0.889569	0.0176191	0.949243	0.00379905	-0.658521	0.155002	0.71	0.113955	0.429892	0.394886	-0.527764	0.281854	-0.262368	0.615478	-0.0739629	0.889258
ENSDARG00000018602	ENSDARG00000018602	rab5aa	turquoise	-0.863714	0.0265952	0.986377	0.000277115	-0.564581	0.243109	0.597183	0.210712	0.610929	0.197616	-0.671577	0.144081	-0.36371	0.478492	-0.134433	0.799566
ENSDARG00000018693	ENSDARG00000018693	cdh2	turquoise	-0.977261	0.000769721	0.986751	0.000262125	-0.783048	0.0654966	0.707349	0.115935	0.734724	0.0962234	-0.668199	0.146873	-0.288897	0.57871	-0.0989695	0.852031
ENSDARG00000018787	ENSDARG00000018787	efna1b	turquoise	-0.862548	0.027041	0.975284	0.000908808	-0.557632	0.250251	0.504444	0.307515	0.624925	0.184639	-0.637328	0.173445	-0.291933	0.574541	-0.228669	0.662975
ENSDARG00000018809	ENSDARG00000018809	abhd3	turquoise	-0.765085	0.0762954	0.889322	0.0176966	-0.53221	0.277059	0.345706	0.502099	0.721488	0.105552	-0.468039	0.349206	-0.511742	0.299395	-0.46735	0.350013
ENSDARG00000018853	ENSDARG00000018853	si:dkey-199f5.8	turquoise	-0.944617	0.00451598	0.941338	0.00506098	-0.774622	0.0704687	0.87778	0.0214939	0.606674	0.201633	-0.705072	0.117647	-0.276003	0.596508	0.158653	0.764018
ENSDARG00000018898	ENSDARG00000018898	zfand5a	turquoise	-0.982873	0.00043751	0.981594	0.000505028	-0.803452	0.0541503	0.703942	0.118501	0.72594	0.102371	-0.632153	0.17808	-0.284702	0.584485	-0.126638	0.811058
ENSDARG00000018958	ENSDARG00000018958	nrarpb	turquoise	-0.902753	0.0137257	0.972137	0.00115371	-0.693709	0.126354	0.767394	0.074866	0.546777	0.261568	-0.58073	0.22683	-0.422147	0.404394	-0.0537105	0.919512
ENSDARG00000018985	ENSDARG00000018985	gatsl2	turquoise	-0.855292	0.0298954	0.972736	0.00110486	-0.555237	0.252731	0.700502	0.121116	0.560398	0.247398	-0.74069	0.0921444	-0.335006	0.51629	0.0421559	0.936804
ENSDARG00000019033	ENSDARG00000019033	tmem59	turquoise	-0.930668	0.00704382	0.888866	0.0178398	-0.839896	0.0363977	0.73935	0.0930534	0.907794	0.0123609	-0.698937	0.122314	-0.405928	0.424552	-0.0200806	0.969883
ENSDARG00000019062	ENSDARG00000019062	arpc5b	turquoise	-0.896521	0.0155077	0.994281	4.89606e-05	-0.618383	0.190659	0.620129	0.189045	0.604269	0.203918	-0.639984	0.171086	-0.334009	0.517617	-0.150684	0.775685
ENSDARG00000019103	ENSDARG00000019103	kdm4ab	turquoise	-0.890585	0.0173024	0.989767	0.00015655	-0.613286	0.195405	0.632675	0.17761	0.557692	0.250188	-0.615036	0.193771	-0.327235	0.526668	-0.142008	0.78842
ENSDARG00000019130	ENSDARG00000019130	plk2b	turquoise	-0.923956	0.00845415	0.913992	0.010778	-0.815602	0.0478689	0.659204	0.154423	0.895557	0.0157928	-0.617345	0.191622	-0.473422	0.34292	-0.179432	0.73374
ENSDARG00000019188	ENSDARG00000019188	ube2l3a	turquoise	-0.870514	0.0240645	0.983885	0.000387471	-0.573291	0.234273	0.588571	0.219089	0.545327	0.263094	-0.616091	0.192788	-0.309916	0.550009	-0.163377	0.757115
ENSDARG00000019213	ENSDARG00000019213	CTBP1	turquoise	-0.904658	0.0132019	0.972386	0.00113324	-0.650356	0.162004	0.507994	0.303555	0.70681	0.116339	-0.606969	0.201354	-0.290591	0.576382	-0.282672	0.587286
ENSDARG00000019236	ENSDARG00000019236	gsr	turquoise	-0.238956	0.648388	0.392911	0.440962	0.131914	0.803277	0.352417	0.49326	-0.24009	0.646785	-0.573311	0.234253	0.320281	0.536006	0.519726	0.290604
ENSDARG00000019426	ENSDARG00000019426	trioa	turquoise	-0.84171	0.0356006	0.842825	0.0351144	-0.755889	0.0821118	0.944355	0.00455846	0.598265	0.209669	-0.631789	0.178408	-0.50149	0.310826	0.232703	0.657245
ENSDARG00000019492	ENSDARG00000019492	shbg	turquoise	-0.847062	0.0332966	0.928222	0.00754314	-0.60601	0.202263	0.83573	0.0382606	0.481597	0.333454	-0.710241	0.113776	-0.343143	0.505488	0.189808	0.718708
ENSDARG00000019521	ENSDARG00000019521	mpx	turquoise	-0.937229	0.00578672	0.971511	0.00120585	-0.772717	0.0716159	0.77561	0.0698772	0.745888	0.0886549	-0.654608	0.158342	-0.480167	0.335104	-0.0559321	0.916189
ENSDARG00000019613	ENSDARG00000019613	ip6k2b	turquoise	-0.919429	0.00947597	0.882372	0.0199407	-0.819691	0.0458361	0.709558	0.114284	0.922747	0.00872156	-0.7125	0.112102	-0.394704	0.438689	-0.0289555	0.956579
ENSDARG00000019693	ENSDARG00000019693	clcn5a	turquoise	-0.833242	0.0393939	0.870981	0.023895	-0.668701	0.146457	0.923838	0.00848018	0.493893	0.319399	-0.68402	0.133991	-0.389822	0.444886	0.282029	0.588173
ENSDARG00000019702	ENSDARG00000019702	aldocb	turquoise	-0.800257	0.0558611	0.935512	0.00610389	-0.485173	0.329343	0.396009	0.437038	0.510369	0.300916	-0.504959	0.30694	-0.276794	0.595412	-0.3512	0.494858
ENSDARG00000019772	ENSDARG00000019772	si:ch1073-280e3.1	turquoise	-0.914254	0.0107134	0.861255	0.0275399	-0.777274	0.0688857	0.547872	0.260417	0.913391	0.0109269	-0.699014	0.122255	-0.183456	0.727903	-0.132435	0.802509
ENSDARG00000019861	ENSDARG00000019861	fgl2a	turquoise	-0.766541	0.0753928	0.893676	0.0163563	-0.44582	0.375575	0.37327	0.466099	0.365732	0.475862	-0.434788	0.388914	-0.15916	0.763276	-0.333527	0.518261
ENSDARG00000020114	ENSDARG00000020114	slc20a1a	turquoise	-0.937901	0.00566464	0.964859	0.00183061	-0.76953	0.0735539	0.827983	0.04184	0.604825	0.203389	-0.609587	0.19888	-0.401252	0.430423	0.00492535	0.992612
ENSDARG00000020136	ENSDARG00000020136	ptges	turquoise	-0.88415	0.0193543	0.968861	0.00143932	-0.618878	0.190201	0.482207	0.332752	0.667564	0.147401	-0.573935	0.233625	-0.306192	0.555065	-0.315186	0.542877
ENSDARG00000020187	ENSDARG00000020187	GCA	turquoise	-0.870708	0.0239941	0.96986	0.00134892	-0.611629	0.196959	0.493164	0.320225	0.679714	0.137447	-0.564953	0.242729	-0.386766	0.448779	-0.323724	0.531377
ENSDARG00000020279	ENSDARG00000020279	efcab7	turquoise	-0.923948	0.00845592	0.91186	0.0113107	-0.741767	0.0914164	0.592754	0.215003	0.8852	0.019012	-0.752346	0.0844041	-0.232642	0.657332	-0.0892653	0.866458
ENSDARG00000020363	ENSDARG00000020363	snrnp25	turquoise	-0.872628	0.0233021	0.939806	0.00532597	-0.624851	0.184706	0.824934	0.0432894	0.595207	0.212622	-0.807688	0.0519198	-0.308426	0.552031	0.219082	0.676634
ENSDARG00000020397	ENSDARG00000020397	snx15	turquoise	-0.88788	0.0181517	0.982214	0.000471705	-0.641067	0.170128	0.70839	0.115156	0.68888	0.130136	-0.71526	0.110073	-0.448026	0.372926	-0.0379286	0.943134
ENSDARG00000020497	ENSDARG00000020497	rab7	turquoise	-0.937175	0.00579651	0.998048	5.71425e-06	-0.701544	0.120321	0.719758	0.106799	0.649493	0.162752	-0.67162	0.144045	-0.347769	0.499377	-0.0670097	0.899636
ENSDARG00000020625	ENSDARG00000020625	jak1	turquoise	-0.945678	0.00434625	0.980281	0.000579429	-0.755729	0.0822148	0.735224	0.0958785	0.777089	0.0689957	-0.703093	0.119144	-0.413985	0.414498	-0.0594875	0.910874
ENSDARG00000020741	ENSDARG00000020741	fga	turquoise	-0.950417	0.00362672	0.984591	0.000354313	-0.749177	0.0864783	0.790552	0.0612085	0.692103	0.127606	-0.708639	0.11497	-0.363453	0.478826	0.0176502	0.973527
ENSDARG00000020759	ENSDARG00000020759	ef1	turquoise	-0.803486	0.0541323	0.946335	0.00424265	-0.493192	0.320194	0.523937	0.286008	0.420264	0.406718	-0.513308	0.297663	-0.318236	0.53876	-0.224061	0.669532
ENSDARG00000020761	ENSDARG00000020761	arrdc2	turquoise	-0.939904	0.00530883	0.982284	0.000468012	-0.730879	0.0988933	0.730021	0.0994935	0.767751	0.0746454	-0.73417	0.0966056	-0.385289	0.450664	-0.0318132	0.952296
ENSDARG00000020847	ENSDARG00000020847	atp6v0a1a	turquoise	-0.945947	0.00430366	0.978548	0.000685362	-0.711742	0.112663	0.735968	0.095366	0.730396	0.0992313	-0.787589	0.0628857	-0.260473	0.618126	0.0448994	0.932696
ENSDARG00000020876	ENSDARG00000020876	pdk2a	turquoise	-0.859808	0.0281031	0.832338	0.0398091	-0.833692	0.0391874	0.786792	0.0633405	0.850743	0.031754	-0.570906	0.23668	-0.61457	0.194205	-0.0337126	0.94945
ENSDARG00000020891	ENSDARG00000020891	CABZ01067244.1	turquoise	-0.827743	0.0419531	0.947134	0.00411834	-0.55969	0.248128	0.457681	0.361415	0.72739	0.101344	-0.605516	0.202732	-0.437362	0.385787	-0.31045	0.549286
ENSDARG00000021004	ENSDARG00000021004	c5	turquoise	-0.95555	0.00291973	0.940142	0.00526727	-0.772759	0.0715903	0.74677	0.0880692	0.815982	0.0476784	-0.803829	0.0539497	-0.234938	0.654077	0.0742024	0.888901
ENSDARG00000021033	ENSDARG00000021033	herpud2	turquoise	-0.940574	0.00519217	0.98808	0.000212299	-0.725988	0.102337	0.756938	0.0814385	0.599688	0.2083	-0.628019	0.181819	-0.34325	0.505346	-0.0505514	0.924237
ENSDARG00000021143	ENSDARG00000021143	rtn1b	turquoise	-0.962391	0.00209509	0.926737	0.00785459	-0.794653	0.0589219	0.83577	0.0382425	0.578662	0.228889	-0.679588	0.137549	-0.133842	0.800436	0.133044	0.801612
ENSDARG00000021147	ENSDARG00000021147	nipal3	turquoise	-0.853881	0.0304664	0.941233	0.00507884	-0.63529	0.175265	0.816528	0.0474052	0.501651	0.310645	-0.631713	0.178476	-0.442873	0.379122	0.0779845	0.88326
ENSDARG00000021208	ENSDARG00000021208	serpind1	turquoise	-0.868467	0.0248134	0.882079	0.0200382	-0.704112	0.118372	0.905716	0.0129152	0.437082	0.386127	-0.628535	0.181351	-0.280964	0.589644	0.23112	0.659493
ENSDARG00000021209	ENSDARG00000021209	kctd9a	turquoise	-0.754304	0.0831336	0.682185	0.135459	-0.75525	0.082523	0.916909	0.0100693	0.273882	0.59945	-0.340409	0.509109	-0.287573	0.580531	0.228948	0.662578
ENSDARG00000021309	ENSDARG00000021309	rhoca	turquoise	-0.760278	0.0793118	0.873664	0.0229329	-0.464567	0.353282	0.24561	0.638993	0.653377	0.159398	-0.519291	0.29108	-0.239163	0.648096	-0.444443	0.37723
ENSDARG00000021343	ENSDARG00000021343	wsb1	turquoise	-0.905381	0.0130057	0.965823	0.00173215	-0.69491	0.125421	0.567817	0.239811	0.801123	0.0553951	-0.629264	0.18069	-0.427484	0.397834	-0.250862	0.631601
ENSDARG00000021569	ENSDARG00000021569	gdap2	turquoise	-0.921925	0.00890556	0.994851	3.96955e-05	-0.649783	0.162501	0.655214	0.157822	0.670406	0.145046	-0.724603	0.103322	-0.281712	0.588611	-0.0690253	0.896627
ENSDARG00000021647	ENSDARG00000021647	gnai1	turquoise	-0.908269	0.0122359	0.969475	0.00138347	-0.677509	0.139231	0.681947	0.135649	0.494379	0.318847	-0.531998	0.277287	-0.294675	0.570781	-0.136907	0.795922
ENSDARG00000021677	ENSDARG00000021677	phf11	turquoise	-0.817413	0.0469632	0.858996	0.0284214	-0.646653	0.165223	0.925063	0.00821286	0.494906	0.31825	-0.712241	0.112294	-0.381189	0.455911	0.320987	0.535056
ENSDARG00000021924	ENSDARG00000021924	hsp70.3	turquoise	-0.54886	0.259381	0.782069	0.0660659	-0.115689	0.827241	0.2884	0.579394	0.181849	0.730233	-0.554124	0.253887	-0.115528	0.827479	-0.105234	0.842732
ENSDARG00000021979	ENSDARG00000021979	mical3a	turquoise	-0.900797	0.0142736	0.955855	0.00288011	-0.709885	0.114041	0.841251	0.0358015	0.623788	0.185679	-0.685092	0.133136	-0.448083	0.372858	0.0854205	0.872181
ENSDARG00000021987	ENSDARG00000021987	plecb	turquoise	-0.00950117	0.985749	0.35944	0.484059	0.367429	0.473659	0.047083	0.929428	-0.128377	0.808492	-0.307891	0.552758	-0.394377	0.439104	0.00528304	0.992076
ENSDARG00000022340	ENSDARG00000022340	ufc1	turquoise	-0.748129	0.087169	0.925481	0.00812277	-0.391388	0.442895	0.403575	0.427503	0.563725	0.243984	-0.644795	0.166847	-0.331226	0.521331	-0.227365	0.664829
ENSDARG00000022652	ENSDARG00000022652	psmf1	turquoise	-0.891855	0.0169108	0.973524	0.00104223	-0.611315	0.197253	0.650801	0.16162	0.487025	0.327223	-0.612687	0.195966	-0.222368	0.671946	-0.0838273	0.874554
ENSDARG00000022788	ENSDARG00000022788	cops7a	turquoise	-0.865824	0.0257969	0.973957	0.00100856	-0.564596	0.243094	0.699754	0.121689	0.527645	0.281983	-0.722533	0.104801	-0.285461	0.58344	0.0376909	0.94349
ENSDARG00000023188	ENSDARG00000023188	lcp1	turquoise	-0.734522	0.0963629	0.885549	0.018899	-0.435576	0.387956	0.392817	0.441081	0.331337	0.521182	-0.357189	0.487003	-0.304779	0.556986	-0.375179	0.463636
ENSDARG00000023220	ENSDARG00000023220	selt2	turquoise	-0.840523	0.0361213	0.975357	0.000903438	-0.526572	0.283145	0.541285	0.267368	0.551784	0.256324	-0.618395	0.190648	-0.334453	0.517026	-0.192059	0.715454
ENSDARG00000023287	ENSDARG00000023287	hsd17b3	turquoise	-0.77035	0.0730527	0.780524	0.0669686	-0.68979	0.12942	0.846713	0.0334444	0.773265	0.0712852	-0.732494	0.097768	-0.561182	0.246592	0.244907	0.639985
ENSDARG00000023394	ENSDARG00000023394	slc37a2	turquoise	-0.858316	0.0286893	0.975261	0.000910487	-0.59328	0.214492	0.704684	0.11794	0.622831	0.186557	-0.69861	0.122566	-0.457701	0.36139	-0.0245938	0.963117
ENSDARG00000023479	ENSDARG00000023479	lrp13	turquoise	-0.574314	0.233244	0.583513	0.22407	-0.569995	0.237601	0.57356	0.234002	0.0414528	0.937856	0.0823271	0.876788	-0.412066	0.416885	-0.244978	0.639884
ENSDARG00000023578	ENSDARG00000023578	lpp	turquoise	-0.969052	0.0014218	0.970141	0.00132406	-0.763224	0.0774573	0.7895	0.0618019	0.662734	0.151441	-0.735892	0.0954187	-0.204679	0.697268	0.0732999	0.890247
ENSDARG00000023766	ENSDARG00000023766	gnsa	turquoise	-0.927208	0.00775522	0.973303	0.00105956	-0.708419	0.115134	0.628991	0.180937	0.809651	0.0509009	-0.713481	0.111379	-0.363372	0.478932	-0.13417	0.799953
ENSDARG00000023920	ENSDARG00000023920	llgl2	turquoise	-0.817438	0.0469508	0.943307	0.00473004	-0.53027	0.279147	0.41937	0.407823	0.691693	0.127927	-0.594241	0.213558	-0.386993	0.448489	-0.330879	0.521794
ENSDARG00000023989	ENSDARG00000023989	pef1	turquoise	-0.901341	0.0141202	0.992465	8.49584e-05	-0.612768	0.195891	0.61564	0.193207	0.649704	0.162569	-0.706982	0.11621	-0.290099	0.577058	-0.10555	0.842264
ENSDARG00000024092	ENSDARG00000024092	lmbr1	turquoise	-0.891403	0.0170495	0.985128	0.000330109	-0.606	0.202272	0.704149	0.118344	0.616797	0.192131	-0.754185	0.0832107	-0.310086	0.549778	0.0247131	0.962938
ENSDARG00000024160	ENSDARG00000024160	hao1	turquoise	-0.975251	0.000911163	0.963666	0.00195629	-0.808936	0.0512705	0.824284	0.0436017	0.647376	0.164592	-0.664378	0.15006	-0.269377	0.605708	0.0428628	0.935745
ENSDARG00000024324	ENSDARG00000024324	arhgap1	turquoise	-0.92441	0.00835479	0.955678	0.00290309	-0.750826	0.0853961	0.856803	0.02929	0.609803	0.198676	-0.658735	0.154821	-0.404503	0.426338	0.0796669	0.880753
ENSDARG00000024398	ENSDARG00000024398	get4	turquoise	-0.910768	0.0115883	0.970026	0.0013342	-0.643822	0.167701	0.762985	0.077607	0.617604	0.191382	-0.797373	0.057427	-0.232715	0.657229	0.126918	0.810646
ENSDARG00000024789	ENSDARG00000024789	mxc	turquoise	-0.69681	0.123951	0.840956	0.0359308	-0.383625	0.452791	0.360605	0.482539	0.223508	0.670321	-0.333181	0.518721	-0.175325	0.739707	-0.332523	0.5196
ENSDARG00000024815	ENSDARG00000024815	ogfrl2	turquoise	0.912438	0.011165	-0.873838	0.0228711	0.850986	0.0316535	-0.881691	0.0201676	-0.788257	0.0625057	0.661231	0.152707	0.483076	0.331752	-0.110349	0.835148
ENSDARG00000024874	ENSDARG00000024874	dock4b	turquoise	-0.861155	0.0275785	0.947378	0.00408078	-0.53237	0.276886	0.533981	0.275157	0.502555	0.309631	-0.677276	0.139421	-0.0712323	0.893332	-0.0870751	0.869717
ENSDARG00000025094	ENSDARG00000025094	edem1	turquoise	-0.908318	0.0122231	0.961479	0.00219725	-0.703984	0.118469	0.528097	0.281494	0.775314	0.0700544	-0.568031	0.239594	-0.400513	0.431354	-0.323087	0.532232
ENSDARG00000025147	ENSDARG00000025147	cd63	turquoise	-0.896439	0.015532	0.95256	0.00332239	-0.651303	0.161186	0.459514	0.359243	0.659458	0.154207	-0.532366	0.276891	-0.24	0.646913	-0.349767	0.496744
ENSDARG00000025254	ENSDARG00000025254	s100a10b	turquoise	-0.796409	0.0579547	0.932628	0.00665564	-0.472319	0.344206	0.470487	0.346343	0.401088	0.43063	-0.508023	0.303523	-0.23042	0.660487	-0.245664	0.638917
ENSDARG00000025319	ENSDARG00000025319	fynb	turquoise	-0.823467	0.0439949	0.913808	0.0108234	-0.567252	0.240386	0.715651	0.109786	0.325005	0.529657	-0.530679	0.278706	-0.258505	0.62088	0.0079949	0.988008
ENSDARG00000025340	ENSDARG00000025340	tusc2b	turquoise	-0.891452	0.0170344	0.990457	0.000136161	-0.597306	0.210592	0.598945	0.209014	0.644753	0.166884	-0.699854	0.121612	-0.29914	0.564674	-0.12133	0.818898
ENSDARG00000025468	ENSDARG00000025468	bnip3la	turquoise	-0.523267	0.286737	0.706732	0.116398	-0.332651	0.519428	0.430203	0.394506	0.669373	0.1459	-0.535173	0.27388	-0.775848	0.0697352	-0.150771	0.775557
ENSDARG00000025593	ENSDARG00000025593	plekhj1	turquoise	-0.749874	0.08602	0.858297	0.0286971	-0.512198	0.29889	0.356582	0.487797	0.827858	0.041899	-0.619357	0.189759	-0.456184	0.363191	-0.326016	0.528302
ENSDARG00000025595	ENSDARG00000025595	agmo	turquoise	-0.950395	0.00363	0.950184	0.00366061	-0.781253	0.0665417	0.712166	0.112349	0.851614	0.0313939	-0.744502	0.0895796	-0.344751	0.503361	-0.0347696	0.947867
ENSDARG00000025797	ENSDARG00000025797	abhd2a	turquoise	-0.974818	0.000943242	0.975292	0.000908199	-0.784705	0.0645385	0.784738	0.0645192	0.722536	0.104799	-0.73275	0.0975899	-0.269076	0.606126	0.0366002	0.945124
ENSDARG00000025826	ENSDARG00000025826	gna12a	turquoise	-0.927551	0.00768317	0.958053	0.00260245	-0.73647	0.0950211	0.565501	0.24217	0.823874	0.0437989	-0.623881	0.185595	-0.370976	0.469063	-0.256699	0.623408
ENSDARG00000025858	ENSDARG00000025858	zgc:56525	turquoise	-0.904512	0.0132416	0.953055	0.00325398	-0.714271	0.110798	0.543048	0.2655	0.813739	0.0488087	-0.58629	0.22133	-0.434458	0.389315	-0.302294	0.560371
ENSDARG00000026017	ENSDARG00000026017	xpnpep2	turquoise	-0.842158	0.0354049	0.871422	0.0237355	-0.675071	0.141216	0.417411	0.410246	0.891058	0.0171562	-0.578274	0.229277	-0.39186	0.442296	-0.352945	0.492565
ENSDARG00000026049	ENSDARG00000026049	mxf	turquoise	-0.719876	0.106714	0.877811	0.0214831	-0.388574	0.446474	0.345237	0.502719	0.327159	0.526769	-0.402187	0.429248	-0.223597	0.670194	-0.357211	0.486974
ENSDARG00000026070	ENSDARG00000026070	cd82b	turquoise	-0.745133	0.0891578	0.881912	0.020094	-0.439079	0.383706	0.491309	0.322333	0.253377	0.628068	-0.412798	0.415973	-0.218128	0.677997	-0.212164	0.68653
ENSDARG00000026236	ENSDARG00000026236	zgc:56585	turquoise	-0.909461	0.0119248	0.928622	0.00746045	-0.708853	0.11481	0.718844	0.10746	0.42698	0.398452	-0.503293	0.308804	-0.184754	0.726022	-0.0659959	0.90115
ENSDARG00000026294	ENSDARG00000026294	erbb2	turquoise	-0.759369	0.0798881	0.893286	0.0164741	-0.500144	0.312338	0.776944	0.0690822	0.384972	0.451069	-0.629018	0.180913	-0.438256	0.384704	0.137198	0.795494
ENSDARG00000026329	ENSDARG00000026329	arhgap29a	turquoise	-0.764579	0.0766105	0.897486	0.0152249	-0.44116	0.38119	0.321918	0.533804	0.445401	0.376079	-0.45323	0.366706	-0.19221	0.715236	-0.390582	0.443919
ENSDARG00000026482	ENSDARG00000026482	arhgap12b	turquoise	-0.85015	0.0320003	0.923831	0.00848153	-0.577335	0.230215	0.773974	0.070858	0.398493	0.433901	-0.685416	0.132879	-0.182184	0.729747	0.161498	0.759859
ENSDARG00000026611	ENSDARG00000026611	socs3b	turquoise	-0.946345	0.00424108	0.989175	0.000175153	-0.728151	0.100808	0.721134	0.105807	0.748101	0.0871879	-0.727675	0.101143	-0.355752	0.488884	-0.0428408	0.935778
ENSDARG00000026655	ENSDARG00000026655	tspo	turquoise	-0.965717	0.00174288	0.96703	0.00161259	-0.81992	0.0457234	0.820223	0.0455747	0.709637	0.114226	-0.643004	0.16842	-0.400571	0.431281	-0.0118713	0.982194
ENSDARG00000026985	ENSDARG00000026985	lims1	turquoise	-0.825871	0.0428414	0.923062	0.00865137	-0.561713	0.246047	0.417011	0.410742	0.784523	0.0646433	-0.64736	0.164606	-0.362042	0.480665	-0.297749	0.566575
ENSDARG00000026990	ENSDARG00000026990	klhl6	turquoise	-0.729094	0.100144	0.916362	0.0102004	-0.434841	0.388849	0.572546	0.235023	0.541603	0.267031	-0.608352	0.200045	-0.57001	0.237586	-0.124243	0.814595
ENSDARG00000027063	ENSDARG00000027063	arpc1b	turquoise	-0.893878	0.0162951	0.978481	0.000689635	-0.646262	0.165564	0.552917	0.255143	0.596669	0.211207	-0.521051	0.289154	-0.351655	0.49426	-0.294905	0.570467
ENSDARG00000027070	ENSDARG00000027070	acbd4	turquoise	-0.671934	0.143787	0.875204	0.0223893	-0.270647	0.603942	0.433168	0.390886	0.315486	0.542472	-0.624465	0.18506	-0.203471	0.699006	-0.0752863	0.887284
ENSDARG00000027078	ENSDARG00000027078	cnppd1	turquoise	-0.890675	0.0172745	0.958451	0.00255364	-0.652514	0.160141	0.558462	0.249393	0.812908	0.0492305	-0.706774	0.116366	-0.373113	0.466302	-0.180943	0.731547
ENSDARG00000027154	ENSDARG00000027154	tpd52l2a	turquoise	-0.844009	0.034602	0.969823	0.00135223	-0.522782	0.287266	0.523853	0.286099	0.646233	0.16559	-0.710659	0.113466	-0.302057	0.560694	-0.148622	0.778708
ENSDARG00000027172	ENSDARG00000027172	phactr2	turquoise	-0.811249	0.0500783	0.95531	0.00295122	-0.509604	0.301765	0.623859	0.185615	0.436122	0.387293	-0.57856	0.228991	-0.374026	0.465124	-0.10418	0.844296
ENSDARG00000027200	ENSDARG00000027200	gabarapl2	turquoise	-0.871637	0.023658	0.985488	0.000314349	-0.595841	0.212008	0.564682	0.243006	0.628425	0.181451	-0.602828	0.205292	-0.397881	0.434672	-0.230276	0.660692
ENSDARG00000027310	ENSDARG00000027310	lsp1	turquoise	-0.856262	0.0295059	0.976448	0.000825532	-0.537528	0.271363	0.538907	0.269895	0.558878	0.248964	-0.644329	0.167257	-0.265684	0.610852	-0.171002	0.745998
ENSDARG00000027322	ENSDARG00000027322	lin7c	turquoise	-0.914295	0.0107032	0.957101	0.002721	-0.730242	0.0993388	0.70462	0.117988	0.825711	0.042918	-0.718286	0.107866	-0.462365	0.355875	-0.0660314	0.901097
ENSDARG00000027590	ENSDARG00000027590	2017-09-02	turquoise	-0.822488	0.0444692	0.961399	0.00220625	-0.513547	0.297399	0.480346	0.334896	0.535567	0.273459	-0.551374	0.256751	-0.343311	0.505265	-0.281274	0.589216
ENSDARG00000027609	ENSDARG00000027609	hpn	turquoise	-0.855667	0.0297448	0.925313	0.00815894	-0.642066	0.169246	0.540833	0.267848	0.856421	0.0294424	-0.694433	0.125792	-0.447482	0.373579	-0.192539	0.714761
ENSDARG00000027750	ENSDARG00000027750	dpp7	turquoise	-0.934702	0.00625652	0.980429	0.000570804	-0.723445	0.104148	0.746097	0.0885162	0.756203	0.0819103	-0.744217	0.0897698	-0.389841	0.444862	-0.00417181	0.993742
ENSDARG00000027797	ENSDARG00000027797	adcy6b	turquoise	-0.965342	0.00178096	0.938667	0.00552722	-0.834126	0.0389895	0.856996	0.0292131	0.607345	0.200997	-0.604373	0.203819	-0.294607	0.570875	0.0505935	0.924174
ENSDARG00000028000	ENSDARG00000028000	pfkpa	turquoise	-0.778302	0.0682768	0.908002	0.012306	-0.463306	0.354766	0.430109	0.39462	0.357221	0.48696	-0.444686	0.376938	-0.19953	0.704678	-0.293412	0.572512
ENSDARG00000028017	ENSDARG00000028017	tp53inp1	turquoise	-0.918911	0.00959659	0.910258	0.0117191	-0.818204	0.0465704	0.78046	0.0670058	0.854589	0.0301793	-0.671504	0.14414	-0.506115	0.305649	-0.0187417	0.971891
ENSDARG00000028067	ENSDARG00000028067	bnip3lb	turquoise	-0.907435	0.0124559	0.979011	0.000656188	-0.664037	0.150346	0.773747	0.0709949	0.556996	0.250908	-0.677027	0.139622	-0.337094	0.513512	0.0333594	0.949979
ENSDARG00000028086	ENSDARG00000028086	zbtb2b	turquoise	-0.920549	0.00921784	0.996807	1.52753e-05	-0.677092	0.13957	0.709235	0.114525	0.627702	0.182107	-0.656053	0.157105	-0.375482	0.463246	-0.0809714	0.878808
ENSDARG00000028163	ENSDARG00000028163	prg4b	turquoise	-0.858601	0.0285771	0.961907	0.00214899	-0.592544	0.215208	0.620822	0.188406	0.448999	0.37176	-0.514333	0.296531	-0.326833	0.527206	-0.17616	0.738494
ENSDARG00000028386	ENSDARG00000028386	htatip2	turquoise	0.609551	0.198914	-0.685326	0.13295	0.494916	0.318238	-0.646382	0.165459	-0.78861	0.0623056	0.715302	0.110042	0.642459	0.168901	-0.16161	0.759696
ENSDARG00000028389	ENSDARG00000028389	rab44	turquoise	-0.822954	0.0442433	0.92682	0.00783692	-0.567447	0.240187	0.486603	0.327705	0.425414	0.400374	-0.388429	0.446659	-0.313828	0.544712	-0.351605	0.494326
ENSDARG00000028396	ENSDARG00000028396	fkbp5	turquoise	-0.78067	0.0668831	0.800156	0.0559159	-0.63482	0.175685	0.868418	0.0248316	0.251194	0.631134	-0.480494	0.334726	-0.254185	0.626934	0.216944	0.679689
ENSDARG00000028517	ENSDARG00000028517	hbp1	turquoise	-0.849497	0.0322724	0.941521	0.00502962	-0.597892	0.210028	0.732668	0.0976473	0.398847	0.433454	-0.561659	0.246102	-0.318035	0.539031	-0.00766823	0.988498
ENSDARG00000028614	ENSDARG00000028614	mospd1	turquoise	-0.891097	0.0171439	0.991344	0.000112059	-0.618623	0.190438	0.662174	0.151912	0.665698	0.148956	-0.711411	0.112908	-0.385099	0.450907	-0.0744757	0.888493
ENSDARG00000028628	ENSDARG00000028628	gdap1l1	turquoise	-0.663175	0.15107	0.816499	0.0474195	-0.339545	0.510256	0.282082	0.5881	0.217301	0.67918	-0.307503	0.553284	-0.153737	0.771211	-0.388921	0.446033
ENSDARG00000028676	ENSDARG00000028676	nuak1b	turquoise	-0.913043	0.0110135	0.992968	7.39953e-05	-0.648039	0.164015	0.587217	0.220418	0.661734	0.152283	-0.637035	0.173706	-0.315283	0.542746	-0.198382	0.70633
ENSDARG00000028804	ENSDARG00000028804	ankrd9	turquoise	0.912825	0.0110679	-0.871624	0.0236628	0.749564	0.086224	-0.872995	0.0231712	-0.686091	0.132342	0.84752	0.0331028	0.138552	0.793502	-0.330989	0.521647
ENSDARG00000028878	ENSDARG00000028878	vipr1a	turquoise	-0.872666	0.0232887	0.916028	0.0102809	-0.641666	0.1696	0.68308	0.134742	0.362155	0.480517	-0.497223	0.31563	-0.157228	0.766102	-0.0607201	0.909032
ENSDARG00000028957	ENSDARG00000028957	maff	turquoise	-0.883113	0.0196954	0.933887	0.00641187	-0.678565	0.138375	0.482368	0.332566	0.830565	0.0406302	-0.60417	0.204013	-0.387143	0.448299	-0.317568	0.539662
ENSDARG00000029018	ENSDARG00000029018	cdkn1ba	turquoise	-0.871968	0.0235389	0.962215	0.00211455	-0.600491	0.207528	0.776748	0.0691985	0.548655	0.259596	-0.751731	0.0848052	-0.316867	0.540607	0.125757	0.812359
ENSDARG00000029063	ENSDARG00000029063	clpxa	turquoise	-0.945205	0.00442147	0.967111	0.00160478	-0.757947	0.0807935	0.827184	0.0422173	0.58769	0.219953	-0.646842	0.165058	-0.321535	0.534319	0.0462433	0.930684
ENSDARG00000029072	ENSDARG00000029072	klf6a	turquoise	-0.876528	0.0219269	0.884288	0.0193093	-0.713973	0.111017	0.452386	0.367712	0.892564	0.0166937	-0.599694	0.208294	-0.333849	0.517831	-0.317571	0.539657
ENSDARG00000029146	ENSDARG00000029146	lrp1ab	turquoise	-0.970339	0.00130664	0.970326	0.00130775	-0.794031	0.059266	0.720971	0.105923	0.807996	0.0517589	-0.714991	0.110269	-0.321899	0.533829	-0.0579584	0.91316
ENSDARG00000029381	ENSDARG00000029381	aldh3a2b	turquoise	-0.821282	0.0450562	0.825799	0.0428759	-0.662218	0.151875	0.93739	0.00575734	0.407743	0.42228	-0.684073	0.133948	-0.229813	0.661349	0.375251	0.463543
ENSDARG00000029388	ENSDARG00000029388	si:dkey-90m5.4	turquoise	-0.901264	0.0141418	0.930758	0.00702566	-0.653639	0.159174	0.807047	0.0522542	0.497282	0.315563	-0.750747	0.085448	-0.124035	0.814902	0.205131	0.696619
ENSDARG00000029474	ENSDARG00000029474	camk1b	turquoise	-0.874809	0.0225281	0.947297	0.00409316	-0.644981	0.166684	0.525185	0.28465	0.507474	0.304134	-0.420208	0.406787	-0.309214	0.550962	-0.343924	0.504454
ENSDARG00000029493	ENSDARG00000029493	f9b	turquoise	-0.960345	0.00232762	0.942517	0.00486144	-0.801979	0.0549362	0.817022	0.0471582	0.786662	0.0634147	-0.775047	0.0702139	-0.300818	0.562384	0.107159	0.839877
ENSDARG00000029609	ENSDARG00000029609	macrod1	turquoise	-0.66088	0.153004	0.721224	0.105741	-0.485638	0.32881	0.879762	0.0208165	0.178803	0.734653	-0.563797	0.243911	-0.267654	0.608106	0.407951	0.42202
ENSDARG00000029663	ENSDARG00000029663	rab1ab	turquoise	-0.846011	0.0337431	0.976722	0.000806499	-0.539907	0.268831	0.645954	0.165833	0.593551	0.214228	-0.722475	0.104843	-0.37233	0.467313	-0.0341147	0.948848
ENSDARG00000029720	ENSDARG00000029720	si:dkeyp-9d4.2	turquoise	-0.849456	0.0322895	0.957884	0.00262328	-0.56494	0.242742	0.518253	0.292218	0.47909	0.336348	-0.499799	0.312726	-0.283233	0.586511	-0.273532	0.599935
ENSDARG00000029722	ENSDARG00000029722	hmgb2a	turquoise	-0.823813	0.0438283	0.961709	0.00217123	-0.529717	0.279744	0.640766	0.170394	0.643395	0.168076	-0.73638	0.0950829	-0.443226	0.378696	-0.0318587	0.952228
ENSDARG00000029795	ENSDARG00000029795	fam213b	turquoise	-0.767691	0.0746824	0.915104	0.010505	-0.445343	0.376147	0.437799	0.385258	0.367149	0.474022	-0.458388	0.360577	-0.254676	0.626245	-0.287499	0.580633
ENSDARG00000029890	ENSDARG00000029890	si:dkeyp-86f7.4	turquoise	-0.769723	0.073436	0.884503	0.019239	-0.498586	0.314092	0.368833	0.471838	0.380958	0.456207	-0.329756	0.523295	-0.256673	0.623446	-0.43519	0.388425
ENSDARG00000030116	ENSDARG00000030116	susd6	turquoise	-0.923499	0.00855483	0.931143	0.00694863	-0.761651	0.078445	0.629336	0.180625	0.890488	0.0173328	-0.699164	0.12214	-0.386332	0.449333	-0.137541	0.79499
ENSDARG00000030236	ENSDARG00000030236	tmem30aa	turquoise	-0.980941	0.000541389	0.932353	0.0067094	-0.862042	0.0272359	0.789858	0.0615997	0.822842	0.0442975	-0.708666	0.11495	-0.29925	0.564524	0.0208143	0.968783
ENSDARG00000030289	ENSDARG00000030289	jag1a	turquoise	-0.825252	0.043137	0.915308	0.0104553	-0.5506	0.25756	0.338375	0.511809	0.667689	0.147297	-0.527705	0.281918	-0.250076	0.632705	-0.412945	0.415791
ENSDARG00000030357	ENSDARG00000030357	zgc:66313	turquoise	-0.649392	0.162839	0.855941	0.0296347	-0.376528	0.461899	0.582411	0.225161	0.437642	0.385447	-0.526237	0.283509	-0.64777	0.164249	-0.09717	0.854704
ENSDARG00000030367	ENSDARG00000030367	metrn	turquoise	-0.412133	0.416802	0.419617	0.407517	-0.280976	0.589628	-0.155549	0.768558	0.0770579	0.884642	0.169583	0.748064	0.155009	0.769348	-0.712195	0.112328
ENSDARG00000030465	ENSDARG00000030465	tmem263	turquoise	-0.82801	0.041827	0.965599	0.00175474	-0.529938	0.279506	0.566877	0.240767	0.481889	0.333117	-0.550518	0.257646	-0.369423	0.471074	-0.200989	0.702576
ENSDARG00000030479	ENSDARG00000030479	hmgb1b	turquoise	-0.909296	0.0119676	0.994385	4.72e-05	-0.646178	0.165637	0.654567	0.158376	0.694468	0.125764	-0.710826	0.113342	-0.362888	0.479562	-0.0939714	0.859458
ENSDARG00000030494	ENSDARG00000030494	hfe2	turquoise	-0.983079	0.000427053	0.970841	0.00126299	-0.802356	0.0547347	0.777614	0.0686839	0.660983	0.152917	-0.666419	0.148355	-0.224556	0.668828	-0.00128985	0.998065
ENSDARG00000030694	ENSDARG00000030694	atp6v1e1b	turquoise	-0.707616	0.115735	0.816076	0.0476312	-0.51285	0.298169	0.781443	0.0664311	0.642153	0.16917	-0.766491	0.0754234	-0.573075	0.234491	0.241832	0.644323
ENSDARG00000030753	ENSDARG00000030753	prrg4	turquoise	-0.914444	0.0106665	0.981917	0.000487522	-0.639648	0.171384	0.586891	0.220739	0.579267	0.228286	-0.61768	0.191311	-0.20663	0.694467	-0.170536	0.746676
ENSDARG00000030954	ENSDARG00000030954	ftr56	turquoise	-0.851939	0.0312604	0.966938	0.00162156	-0.577697	0.229853	0.562327	0.245416	0.493848	0.319449	-0.507807	0.303764	-0.35528	0.489502	-0.249689	0.63325
ENSDARG00000030981	ENSDARG00000030981	tmem127	turquoise	-0.968494	0.00147333	0.937985	0.00564955	-0.864282	0.0263791	0.857191	0.0291353	0.715403	0.109968	-0.622471	0.186888	-0.392851	0.441038	0.0235964	0.964612
ENSDARG00000031046	ENSDARG00000031046	nr1h5	turquoise	-0.862787	0.0269496	0.964741	0.0018429	-0.570356	0.237236	0.592239	0.215505	0.456847	0.362404	-0.564271	0.243426	-0.243089	0.642549	-0.154045	0.77076
ENSDARG00000031136	ENSDARG00000031136	moxd1	turquoise	-0.746916	0.0879722	0.876063	0.0220887	-0.446934	0.374237	0.327394	0.526455	0.36799	0.472931	-0.358944	0.484707	-0.212778	0.68565	-0.424594	0.401382
ENSDARG00000031317	ENSDARG00000031317	ppdpfb	turquoise	-0.949312	0.00378884	0.970369	0.00130395	-0.763311	0.0774025	0.622945	0.186452	0.813509	0.0489252	-0.645437	0.166285	-0.361214	0.481744	-0.200789	0.702864
ENSDARG00000031336	ENSDARG00000031336	hsd20b2	turquoise	-0.612125	0.196493	0.833965	0.039063	-0.253142	0.628397	0.526861	0.282832	0.218075	0.678073	-0.544324	0.264153	-0.365053	0.476744	-0.00706998	0.989395
ENSDARG00000031647	ENSDARG00000031647	stat2	turquoise	-0.805034	0.0533121	0.80453	0.0535784	-0.673928	0.14215	0.93616	0.0059833	0.351129	0.494952	-0.589359	0.218317	-0.264294	0.612789	0.327171	0.526754
ENSDARG00000031678	ENSDARG00000031678	col5a2a	turquoise	0.74548	0.088927	-0.753231	0.0838289	0.734292	0.0965218	-0.415577	0.41252	-0.797004	0.0576284	0.226339	0.66629	0.68007	0.137159	0.541122	0.267541
ENSDARG00000031681	ENSDARG00000031681	atp6v0b	turquoise	-0.821609	0.0448967	0.900738	0.0142904	-0.636741	0.173968	0.536691	0.272257	0.856948	0.0292321	-0.633664	0.176721	-0.556619	0.251299	-0.23234	0.657762
ENSDARG00000031683	ENSDARG00000031683	fosab	turquoise	-0.630127	0.179909	0.690876	0.128567	-0.454251	0.36549	0.895957	0.0156743	0.21345	0.684687	-0.638713	0.172214	-0.266189	0.610148	0.506794	0.304892
ENSDARG00000031715	ENSDARG00000031715	NA	turquoise	-0.803784	0.053974	0.942462	0.00487061	-0.500757	0.311649	0.412716	0.416075	0.53951	0.269253	-0.500686	0.311729	-0.340876	0.50849	-0.362724	0.479776
ENSDARG00000031720	ENSDARG00000031720	clstn1	turquoise	-0.767407	0.0748577	0.713038	0.111706	-0.703577	0.118777	0.738737	0.0934709	0.897634	0.0151818	-0.812609	0.049383	-0.347885	0.499223	0.264113	0.613042
ENSDARG00000031757	ENSDARG00000031757	tmc4	turquoise	-0.85384	0.0304828	0.964306	0.00188834	-0.55175	0.256359	0.537668	0.271214	0.481707	0.333327	-0.557155	0.250744	-0.24651	0.637725	-0.211268	0.687813
ENSDARG00000031814	ENSDARG00000031814	dhrs13b	turquoise	-0.902131	0.0138988	0.950594	0.00360112	-0.648533	0.163585	0.775516	0.0699333	0.678995	0.138027	-0.849978	0.0320716	-0.241899	0.644229	0.180856	0.731674
ENSDARG00000031968	ENSDARG00000031968	cpped1	turquoise	-0.95794	0.00261641	0.960646	0.00229258	-0.765058	0.0763125	0.641406	0.169829	0.827096	0.0422592	-0.714148	0.110889	-0.272044	0.602001	-0.11513	0.828068
ENSDARG00000032098	ENSDARG00000032098	c8g	turquoise	-0.96585	0.00172946	0.969438	0.00138676	-0.779095	0.0678088	0.675757	0.140656	0.814564	0.0483916	-0.707473	0.115842	-0.299432	0.564276	-0.100118	0.850324
ENSDARG00000032114	ENSDARG00000032114	slain2	turquoise	-0.870943	0.0239088	0.88255	0.0198815	-0.67803	0.138808	0.90297	0.0136656	0.581344	0.22622	-0.818462	0.0464427	-0.234176	0.655157	0.352469	0.493192
ENSDARG00000032197	ENSDARG00000032197	klf12b	turquoise	-0.92387	0.00847309	0.992185	9.13802e-05	-0.687214	0.131452	0.680352	0.136932	0.585919	0.221695	-0.590384	0.217314	-0.344503	0.503689	-0.142605	0.787543
ENSDARG00000032458	ENSDARG00000032458	mark2b	turquoise	-0.852613	0.0309835	0.962851	0.00204447	-0.582172	0.225398	0.756638	0.0816311	0.557604	0.25028	-0.723532	0.104086	-0.397619	0.435003	0.077284	0.884305
ENSDARG00000032553	ENSDARG00000032553	egln3	turquoise	-0.952662	0.00330826	0.983124	0.000424771	-0.754293	0.0831409	0.694427	0.125795	0.607802	0.200565	-0.55522	0.252748	-0.314598	0.543671	-0.163149	0.757448
ENSDARG00000032601	ENSDARG00000032601	macrod2	turquoise	-0.855951	0.0296306	0.837433	0.037494	-0.778739	0.0680185	0.830047	0.0408716	0.845712	0.0338706	-0.728278	0.100719	-0.506898	0.304776	0.14673	0.781485
ENSDARG00000032617	ENSDARG00000032617	fgfrl1a	turquoise	0.924151	0.00841142	-0.909473	0.0119219	0.819863	0.0457511	-0.865739	0.0258289	-0.780669	0.0668834	0.700567	0.121066	0.46238	0.355858	-0.10361	0.845142
ENSDARG00000032866	ENSDARG00000032866	erh	turquoise	-0.874549	0.0226199	0.981946	0.000485954	-0.611893	0.196711	0.553552	0.254481	0.61839	0.190653	-0.558685	0.249164	-0.404762	0.426014	-0.272863	0.600864
ENSDARG00000032933	ENSDARG00000032933	dtx2	turquoise	-0.848373	0.0327432	0.976409	0.000828254	-0.532328	0.276932	0.532359	0.276898	0.616978	0.191963	-0.672251	0.143526	-0.321351	0.534566	-0.174005	0.741626
ENSDARG00000033020	ENSDARG00000033020	ppcdc	turquoise	-0.7947	0.0588957	0.900032	0.0144908	-0.565728	0.241938	0.818945	0.0462039	0.576317	0.231233	-0.751262	0.0851112	-0.486242	0.328119	0.201836	0.701358
ENSDARG00000033144	ENSDARG00000033144	psme2	turquoise	-0.796406	0.0579564	0.920115	0.00931748	-0.475818	0.340136	0.388927	0.446025	0.447912	0.373063	-0.488263	0.325806	-0.187386	0.722212	-0.330047	0.522905
ENSDARG00000033307	ENSDARG00000033307	igf2b	turquoise	0.653327	0.159441	-0.705337	0.117447	0.594156	0.213641	-0.220892	0.674052	-0.736246	0.0951747	0.156124	0.767716	0.637168	0.173588	0.68264	0.135095
ENSDARG00000033320	ENSDARG00000033320	sar1ab	turquoise	-0.899764	0.0145674	0.881427	0.0202558	-0.767687	0.0746854	0.941292	0.00506885	0.595675	0.212169	-0.723931	0.103801	-0.306893	0.554113	0.286362	0.582198
ENSDARG00000033380	ENSDARG00000033380	gyg2	turquoise	-0.873452	0.0230082	0.839816	0.0364334	-0.76603	0.075709	0.922603	0.00875372	0.418781	0.408551	-0.555807	0.252139	-0.241126	0.645321	0.225928	0.666875
ENSDARG00000033437	ENSDARG00000033437	rps6ka1	turquoise	-0.859543	0.0282067	0.964098	0.00191031	-0.573185	0.23438	0.594045	0.213749	0.453574	0.366295	-0.545812	0.262584	-0.270052	0.60477	-0.168979	0.748944
ENSDARG00000033609	ENSDARG00000033609	map1lc3a	turquoise	-0.903319	0.013569	0.894736	0.0160375	-0.79333	0.0596552	0.632778	0.177517	0.920615	0.00920282	-0.638227	0.172645	-0.468235	0.348976	-0.170461	0.746785
ENSDARG00000033614	ENSDARG00000033614	rasgef1ba	turquoise	-0.954603	0.00304456	0.990006	0.000149326	-0.741352	0.0916969	0.634692	0.1758	0.728308	0.100697	-0.628907	0.181013	-0.321487	0.534383	-0.192668	0.714574
ENSDARG00000033616	ENSDARG00000033616	sepn1	turquoise	-0.888664	0.0179034	0.98522	0.000326064	-0.602965	0.205162	0.700163	0.121375	0.556066	0.251871	-0.700859	0.120844	-0.30055	0.56275	-0.00466762	0.992999
ENSDARG00000034063	ENSDARG00000034063	unm_sa911	turquoise	-0.797899	0.05714	0.917759	0.00986725	-0.509316	0.302085	0.393339	0.440419	0.451509	0.368759	-0.414983	0.413258	-0.267346	0.608535	-0.396991	0.435797
ENSDARG00000034187	ENSDARG00000034187	calm1b	turquoise	-0.781287	0.0665217	0.900343	0.0144025	-0.487558	0.326612	0.399856	0.432182	0.376352	0.462125	-0.39315	0.440659	-0.218068	0.678083	-0.364907	0.476935
ENSDARG00000034273	ENSDARG00000034273	sid4	turquoise	-0.887476	0.0182801	0.931116	0.00695405	-0.683774	0.134187	0.714919	0.110322	0.830736	0.0405508	-0.810205	0.0506148	-0.398427	0.433983	0.0534404	0.919916
ENSDARG00000034307	ENSDARG00000034307	chrne	turquoise	-0.742779	0.0907348	0.890161	0.0174343	-0.447632	0.373399	0.6876	0.131147	0.286037	0.582646	-0.56224	0.245506	-0.337769	0.512615	0.0514577	0.922882
ENSDARG00000034718	ENSDARG00000034718	tfpia	turquoise	-0.797396	0.0574144	0.928084	0.0075719	-0.482186	0.332776	0.513254	0.297722	0.362206	0.480451	-0.498915	0.313721	-0.227574	0.664532	-0.202321	0.700659
ENSDARG00000034753	ENSDARG00000034753	tspan3a	turquoise	-0.920071	0.00932758	0.990176	0.00014429	-0.695828	0.12471	0.665528	0.149098	0.738572	0.0935835	-0.667338	0.147589	-0.432608	0.39157	-0.141414	0.789293
ENSDARG00000034801	ENSDARG00000034801	mylka	turquoise	-0.894972	0.015967	0.98159	0.000505288	-0.630093	0.179939	0.674223	0.141908	0.511674	0.29947	-0.598714	0.209236	-0.303223	0.559105	-0.0992857	0.851561
ENSDARG00000034817	ENSDARG00000034817	asah1b	turquoise	-0.868057	0.024965	0.982318	0.000466228	-0.562641	0.245095	0.565308	0.242367	0.558339	0.24952	-0.629296	0.180661	-0.2888	0.578844	-0.17138	0.745447
ENSDARG00000034933	ENSDARG00000034933	chchd3b	turquoise	-0.740715	0.0921272	0.896013	0.0156576	-0.411448	0.417655	0.36687	0.474384	0.366484	0.474885	-0.429584	0.395262	-0.24401	0.641249	-0.348823	0.497988
ENSDARG00000034943	ENSDARG00000034943	tm9sf5	turquoise	-0.885446	0.0189324	0.946118	0.00427666	-0.57084	0.236746	0.554765	0.253221	0.61468	0.194102	-0.766987	0.0751167	-0.0514794	0.922849	-0.0284163	0.957387
ENSDARG00000034975	ENSDARG00000034975	gpr157	turquoise	-0.880416	0.0205955	0.887717	0.0182034	-0.714661	0.110512	0.676936	0.139696	0.900921	0.0142387	-0.804761	0.0534564	-0.36349	0.478778	0.0366029	0.94512
ENSDARG00000035005	ENSDARG00000035005	bag2	turquoise	0.704979	0.117717	-0.688343	0.13056	0.66487	0.149648	-0.849323	0.0323449	-0.176157	0.738497	0.266481	0.60974	0.344042	0.504298	-0.137914	0.79444
ENSDARG00000035054	ENSDARG00000035054	pdcd10a	turquoise	-0.885236	0.0190003	0.984091	0.000377628	-0.603248	0.204891	0.536597	0.272357	0.645466	0.16626	-0.621221	0.188038	-0.321344	0.534576	-0.236838	0.651385
ENSDARG00000035136	ENSDARG00000035136	sepw1	turquoise	-0.916768	0.0101031	0.961567	0.00218729	-0.696313	0.124335	0.528406	0.28116	0.791757	0.0605327	-0.630397	0.179664	-0.325731	0.528684	-0.268353	0.607133
ENSDARG00000035398	ENSDARG00000035398	enc1	turquoise	-0.920936	0.0091296	0.994051	5.29758e-05	-0.673111	0.142819	0.668112	0.146946	0.588729	0.218934	-0.606373	0.201918	-0.330105	0.522828	-0.139362	0.792311
ENSDARG00000035521	ENSDARG00000035521	sfrp1a	turquoise	0.902111	0.0139045	-0.933597	0.00646773	0.776443	0.0693803	-0.721083	0.105843	-0.814671	0.0483374	0.601118	0.206927	0.578032	0.229518	0.139715	0.791792
ENSDARG00000035552	ENSDARG00000035552	agtr2	turquoise	-0.927278	0.00774041	0.861941	0.0272749	-0.828993	0.0413647	0.910468	0.0116652	0.734752	0.0962041	-0.773408	0.0711987	-0.252585	0.62918	0.277144	0.594928
ENSDARG00000035557	ENSDARG00000035557	gabarapa	turquoise	-0.919431	0.00947546	0.994075	5.25587e-05	-0.68014	0.137103	0.619049	0.190043	0.703208	0.119057	-0.631765	0.178429	-0.389181	0.445702	-0.198678	0.705904
ENSDARG00000035562	ENSDARG00000035562	mpdu1a	turquoise	-0.762297	0.0780388	0.852887	0.0308714	-0.45456	0.365121	0.696336	0.124317	0.239427	0.647722	-0.64679	0.165104	-0.0482293	0.927712	0.201629	0.701656
ENSDARG00000035577	ENSDARG00000035577	cds2	turquoise	-0.900888	0.0142481	0.965512	0.00176359	-0.686124	0.132316	0.604635	0.20357	0.811865	0.0497626	-0.678216	0.138658	-0.44035	0.382169	-0.181484	0.730763
ENSDARG00000035578	ENSDARG00000035578	hs3st1l2	turquoise	-0.888311	0.0180149	0.959758	0.00239656	-0.643159	0.168284	0.46736	0.350001	0.677043	0.13961	-0.534427	0.274679	-0.309929	0.549992	-0.358141	0.485757
ENSDARG00000035610	ENSDARG00000035610	zgc:113208	turquoise	-0.906334	0.0127492	0.930769	0.00702342	-0.656116	0.157051	0.516943	0.293656	0.792013	0.0603892	-0.747294	0.0877213	-0.142079	0.788316	-0.131297	0.804186
ENSDARG00000035660	ENSDARG00000035660	si:ch211-193k19.1	turquoise	0.816524	0.0474071	-0.826476	0.0425532	0.705514	0.117313	-0.844181	0.0345277	-0.791831	0.0604913	0.778091	0.0684015	0.498332	0.314378	-0.235572	0.653178
ENSDARG00000035663	ENSDARG00000035663	zgc:103438	turquoise	-0.954032	0.00312098	0.953971	0.0031293	-0.793151	0.0597543	0.839405	0.0366153	0.744832	0.0893589	-0.742535	0.0908986	-0.358655	0.485085	0.0964638	0.855753
ENSDARG00000035719	ENSDARG00000035719	arl5c	turquoise	-0.965897	0.00172467	0.923106	0.00864176	-0.834623	0.0387628	0.874092	0.0227811	0.724625	0.103306	-0.741087	0.0918759	-0.263766	0.613526	0.162795	0.757964
ENSDARG00000035837	ENSDARG00000035837	zgc:153595	turquoise	-0.319939	0.536466	0.495369	0.317726	0.051236	0.923213	0.369853	0.470517	-0.24481	0.64012	-0.461909	0.356413	0.186577	0.723382	0.325449	0.529062
ENSDARG00000035858	ENSDARG00000035858	cnn2	turquoise	-0.754039	0.0833052	0.891713	0.0169543	-0.447281	0.37382	0.350649	0.495583	0.385932	0.449843	-0.388635	0.446396	-0.243036	0.642624	-0.402517	0.428832
ENSDARG00000035942	ENSDARG00000035942	hrh3	turquoise	0.697124	0.123709	-0.790049	0.0614916	0.547723	0.260574	-0.767489	0.0748073	-0.694123	0.126032	0.713911	0.111063	0.647621	0.164379	-0.185248	0.725306
ENSDARG00000036028	ENSDARG00000036028	arrdc3b	turquoise	-0.898437	0.0149488	0.79953	0.0562541	-0.911275	0.011459	0.796683	0.0578043	0.890502	0.0173284	-0.594191	0.213607	-0.449257	0.371451	0.0184114	0.972386
ENSDARG00000036041	ENSDARG00000036041	f2	turquoise	-0.961406	0.00220554	0.95083	0.00356709	-0.776836	0.069146	0.661642	0.152361	0.836372	0.0379708	-0.736863	0.0947516	-0.246245	0.638098	-0.0715643	0.892837
ENSDARG00000036059	ENSDARG00000036059	tmppe	turquoise	-0.918978	0.00958093	0.98509	0.000331806	-0.682787	0.134977	0.581018	0.226544	0.631114	0.179017	-0.548888	0.259352	-0.331883	0.520454	-0.266535	0.609665
ENSDARG00000036086	ENSDARG00000036086	itga11a	turquoise	-0.966217	0.00169269	0.91716	0.0100095	-0.877234	0.0216821	0.867746	0.0250801	0.764403	0.0767202	-0.665604	0.149034	-0.372486	0.467111	0.0743344	0.888704
ENSDARG00000036102	ENSDARG00000036102	ctdsp2	turquoise	-0.891749	0.0169433	0.968325	0.00148905	-0.66549	0.14913	0.587114	0.220519	0.791868	0.0604703	-0.666084	0.148634	-0.445277	0.376227	-0.201406	0.701975
ENSDARG00000036106	ENSDARG00000036106	rgs18	turquoise	-0.829315	0.0412136	0.930761	0.00702506	-0.56442	0.243274	0.392065	0.442035	0.561433	0.246335	-0.438423	0.384501	-0.306005	0.55532	-0.432156	0.392121
ENSDARG00000036107	ENSDARG00000036107	txnipa	turquoise	-0.872626	0.0233028	0.862068	0.0272257	-0.751309	0.0850803	0.927533	0.00768685	0.450414	0.370067	-0.582047	0.225522	-0.311613	0.547709	0.217752	0.678534
ENSDARG00000036116	ENSDARG00000036116	eif3hb	turquoise	-0.96953	0.0013785	0.913228	0.0109675	-0.835159	0.0385191	0.716659	0.10905	0.858961	0.0284354	-0.741523	0.0915812	-0.213818	0.68416	0.00396738	0.994049
ENSDARG00000036155	ENSDARG00000036155	gla	turquoise	-0.580779	0.226781	0.814761	0.048292	-0.252984	0.628619	0.525777	0.284008	0.440025	0.382562	-0.648959	0.163215	-0.564451	0.243242	0.0168872	0.974672
ENSDARG00000036175	ENSDARG00000036175	pcdh1b	turquoise	-0.964492	0.00186885	0.9876	0.000229693	-0.761069	0.0788119	0.75958	0.0797541	0.722176	0.105057	-0.716773	0.108966	-0.319788	0.536669	-0.0111392	0.983292
ENSDARG00000036179	ENSDARG00000036179	myo1ea	turquoise	-0.917618	0.0099007	0.961619	0.00218139	-0.764504	0.0766576	0.783507	0.0652303	0.642999	0.168424	-0.552132	0.255961	-0.515747	0.294973	-0.0978825	0.853645
ENSDARG00000036588	ENSDARG00000036588	mhc1zba	turquoise	-0.93183	0.00681238	0.991386	0.000110978	-0.689688	0.1295	0.752178	0.0845133	0.650946	0.161494	-0.725974	0.102347	-0.325979	0.528351	0.0150796	0.977382
ENSDARG00000036658	ENSDARG00000036658	cab39l	turquoise	-0.85222	0.0311446	0.875708	0.0222127	-0.672587	0.14325	0.547803	0.26049	0.921585	0.00898231	-0.747952	0.0872865	-0.365316	0.476403	-0.110553	0.834846
ENSDARG00000036754	ENSDARG00000036754	hmgn3	turquoise	-0.879333	0.0209622	0.959713	0.00240185	-0.62145	0.187827	0.552503	0.255574	0.491731	0.321854	-0.487022	0.327225	-0.262848	0.614808	-0.265373	0.611284
ENSDARG00000036774	ENSDARG00000036774	rgs12b	turquoise	-0.92807	0.00757478	0.987989	0.000215546	-0.660603	0.153238	0.632179	0.178057	0.709046	0.114666	-0.739941	0.0926522	-0.249885	0.632974	-0.0790654	0.881649
ENSDARG00000036830	ENSDARG00000036830	krt17	turquoise	0.484973	0.329573	-0.506291	0.305453	0.520256	0.290024	-0.495017	0.318124	-0.0193793	0.970935	-0.200665	0.703042	0.518768	0.291654	0.334565	0.516876
ENSDARG00000036848	ENSDARG00000036848	slc43a2a	turquoise	-0.948493	0.00391111	0.904092	0.0133565	-0.868182	0.0249187	0.874343	0.0226924	0.779527	0.0675544	-0.670599	0.144887	-0.415654	0.412425	0.0895341	0.866058
ENSDARG00000036864	ENSDARG00000036864	slc34a2b	turquoise	-0.964919	0.00182447	0.947678	0.0040347	-0.811705	0.0498445	0.851848	0.0312976	0.729729	0.0996986	-0.739934	0.0926565	-0.308559	0.551851	0.117188	0.825023
ENSDARG00000036965	ENSDARG00000036965	rnf24	turquoise	-0.908445	0.0121898	0.956196	0.00283619	-0.681198	0.136251	0.744691	0.0894531	0.462944	0.355193	-0.575297	0.232257	-0.246527	0.637701	-0.0221532	0.966776
ENSDARG00000036967	ENSDARG00000036967	smox	turquoise	-0.95994	0.00237509	0.938192	0.00561223	-0.859401	0.0282623	0.805102	0.0532765	0.797505	0.0573549	-0.626852	0.182881	-0.455209	0.364349	-0.0455709	0.931691
ENSDARG00000037018	ENSDARG00000037018	gab1	turquoise	-0.940832	0.00514774	0.996539	1.79517e-05	-0.705183	0.117564	0.732955	0.0974474	0.654233	0.158663	-0.692174	0.127551	-0.330501	0.522299	-0.0375287	0.943733
ENSDARG00000037061	ENSDARG00000037061	aldh9a1b	turquoise	-0.792406	0.0601698	0.886281	0.0186629	-0.555079	0.252895	0.617196	0.191761	0.816688	0.0473248	-0.814876	0.0482344	-0.453032	0.366942	0.0311094	0.953351
ENSDARG00000037066	ENSDARG00000037066	lgals8a	turquoise	-0.959059	0.00247994	0.92951	0.00727804	-0.823991	0.0437426	0.807222	0.0521629	0.825115	0.0432028	-0.757539	0.0810543	-0.327962	0.525695	0.0805169	0.879486
ENSDARG00000037091	ENSDARG00000037091	asah1a	turquoise	-0.958579	0.00253802	0.932231	0.0067333	-0.832453	0.0397563	0.792994	0.0598418	0.839272	0.0366741	-0.727593	0.101201	-0.370209	0.470056	0.0322023	0.951713
ENSDARG00000037121	ENSDARG00000037121	mat2ab	turquoise	0.875531	0.0222745	-0.983102	0.000425914	0.578876	0.228676	-0.623667	0.18579	-0.524643	0.285239	0.633307	0.177043	0.287834	0.580173	0.111239	0.83383
ENSDARG00000037144	ENSDARG00000037144	cpb2	turquoise	-0.902606	0.0137664	0.971855	0.00117703	-0.658324	0.155169	0.780743	0.0668404	0.662772	0.151409	-0.779135	0.067785	-0.35634	0.488114	0.0999617	0.850557
ENSDARG00000037153	ENSDARG00000037153	atp6ap1b	turquoise	-0.878977	0.0210834	0.970471	0.00129507	-0.617075	0.191873	0.543661	0.264852	0.757514	0.08107	-0.683028	0.134784	-0.381583	0.455405	-0.2053	0.696376
ENSDARG00000037154	ENSDARG00000037154	hivep3b	turquoise	-0.926559	0.0078923	0.998136	5.20679e-06	-0.684839	0.133337	0.677728	0.139054	0.693398	0.126596	-0.678839	0.138154	-0.378526	0.459329	-0.110087	0.835537
ENSDARG00000037191	ENSDARG00000037191	ttr	turquoise	-0.929343	0.00731229	0.964277	0.00189144	-0.704834	0.117827	0.550296	0.257878	0.791669	0.0605816	-0.66432	0.150109	-0.28022	0.590672	-0.221098	0.673758
ENSDARG00000037267	ENSDARG00000037267	zgc:158263	turquoise	-0.86059	0.027798	0.956074	0.00285187	-0.589593	0.218088	0.657194	0.156131	0.420419	0.406527	-0.547797	0.260496	-0.275937	0.5966	-0.0988953	0.852141
ENSDARG00000037281	ENSDARG00000037281	fgg	turquoise	-0.922372	0.00880527	0.924165	0.00840841	-0.76864	0.074099	0.896007	0.0156596	0.679223	0.137843	-0.749743	0.0861065	-0.361099	0.481894	0.200345	0.703504
ENSDARG00000037408	ENSDARG00000037408	tbc1d10c	turquoise	-0.844213	0.0345141	0.917975	0.00981622	-0.620262	0.188922	0.37513	0.463699	0.666134	0.148593	-0.432152	0.392126	-0.342705	0.506067	-0.479557	0.335808
ENSDARG00000037421	ENSDARG00000037421	egr1	turquoise	-0.835868	0.0381981	0.916393	0.010193	-0.584417	0.223176	0.663493	0.150803	0.329626	0.523469	-0.481282	0.333817	-0.228515	0.663194	-0.0809258	0.878876
ENSDARG00000037423	ENSDARG00000037423	smim19	turquoise	-0.860365	0.0278854	0.952709	0.00330182	-0.612209	0.196415	0.672904	0.142989	0.763891	0.0770399	-0.780728	0.0668491	-0.439821	0.382809	-0.0031049	0.995343
ENSDARG00000037488	ENSDARG00000037488	canx	turquoise	-0.889286	0.0177077	0.961608	0.00218265	-0.604695	0.203513	0.558313	0.249547	0.500779	0.311624	-0.574288	0.23327	-0.157519	0.765675	-0.181095	0.731327
ENSDARG00000037551	ENSDARG00000037551	pm20d1.1	turquoise	-0.58586	0.221753	0.766951	0.0751393	-0.28118	0.589346	0.595379	0.212455	0.0614145	0.907994	-0.433738	0.390192	-0.295729	0.569337	0.0697084	0.895607
ENSDARG00000037593	ENSDARG00000037593	prickle2b	turquoise	-0.727768	0.101078	0.846094	0.033708	-0.488178	0.325904	0.372086	0.467628	0.828773	0.0414681	-0.644104	0.167454	-0.486026	0.328366	-0.280576	0.590179
ENSDARG00000037618	ENSDARG00000037618	ddit4	turquoise	-0.878209	0.0213462	0.865778	0.0258142	-0.729736	0.0996938	0.93592	0.00602788	0.490624	0.323114	-0.691184	0.128325	-0.240149	0.646702	0.30953	0.550533
ENSDARG00000037835	ENSDARG00000037835	polr3k	turquoise	-0.760115	0.079415	0.827869	0.0418937	-0.579112	0.228441	0.833193	0.039416	0.257067	0.622893	-0.484065	0.330615	-0.34819	0.498822	0.160781	0.760906
ENSDARG00000037836	ENSDARG00000037836	igfals	turquoise	-0.952353	0.00335128	0.957651	0.00265216	-0.773056	0.0714114	0.771975	0.0720651	0.803208	0.0542803	-0.772437	0.071785	-0.334444	0.517038	0.048187	0.927775
ENSDARG00000037837	ENSDARG00000037837	ogfr	turquoise	-0.862771	0.0269554	0.978919	0.000661924	-0.559151	0.248683	0.524042	0.285893	0.634432	0.176033	-0.652008	0.160577	-0.31698	0.540454	-0.208182	0.692239
ENSDARG00000037838	ENSDARG00000037838	unkl	turquoise	-0.868795	0.0246927	0.90975	0.01185	-0.695587	0.124896	0.693919	0.12619	0.391825	0.44234	-0.384688	0.451432	-0.326081	0.528215	-0.168674	0.749389
ENSDARG00000037861	ENSDARG00000037861	slc2a3b	turquoise	-0.788357	0.062449	0.939905	0.00530859	-0.472116	0.344442	0.4014	0.430237	0.565097	0.242582	-0.539863	0.268877	-0.357047	0.487188	-0.342564	0.506255
ENSDARG00000037870	ENSDARG00000037870	actb2	turquoise	-0.83893	0.036826	0.967189	0.00159717	-0.51615	0.294529	0.659508	0.154164	0.530428	0.278977	-0.739932	0.0926582	-0.291433	0.575226	0.0287714	0.956855
ENSDARG00000037895	ENSDARG00000037895	ramp2	turquoise	-0.944927	0.00446602	0.995334	3.26e-05	-0.709069	0.114649	0.664169	0.150236	0.633963	0.176453	-0.622514	0.186849	-0.291093	0.575693	-0.144428	0.784864
ENSDARG00000037910	ENSDARG00000037910	filip1l	turquoise	-0.88669	0.0185314	0.973123	0.00107388	-0.673669	0.142362	0.756861	0.0814881	0.645398	0.16632	-0.647547	0.164443	-0.506587	0.305122	-0.0409159	0.93866
ENSDARG00000037998	ENSDARG00000037998	flot1b	turquoise	-0.85987	0.028079	0.936479	0.0059243	-0.594012	0.21378	0.397158	0.435586	0.688548	0.130397	-0.559083	0.248753	-0.249979	0.632842	-0.3678	0.473178
ENSDARG00000038010	ENSDARG00000038010	rac2	turquoise	-0.731119	0.098726	0.900386	0.0143902	-0.403102	0.428098	0.353799	0.491445	0.408163	0.421755	-0.433493	0.390491	-0.315185	0.542878	-0.377805	0.460256
ENSDARG00000038025	ENSDARG00000038025	cbx7a	turquoise	-0.905109	0.0130793	0.976593	0.000815402	-0.658569	0.154962	0.585016	0.222585	0.552941	0.255118	-0.522438	0.28764	-0.294305	0.571288	-0.24869	0.634655
ENSDARG00000038106	ENSDARG00000038106	slc37a4a	turquoise	-0.852665	0.0309622	0.91697	0.0100547	-0.667693	0.147294	0.859096	0.028382	0.479113	0.33632	-0.603153	0.204982	-0.440208	0.382341	0.116134	0.826582
ENSDARG00000038123	ENSDARG00000038123	myl9a	turquoise	-0.871063	0.0238653	0.905266	0.0130366	-0.616682	0.192238	0.385113	0.450889	0.605855	0.20241	-0.515936	0.294765	-0.0755476	0.886894	-0.348847	0.497956
ENSDARG00000038151	ENSDARG00000038151	zgc:92360	turquoise	-0.832233	0.0398576	0.863033	0.0268554	-0.62948	0.180494	0.353754	0.491504	0.854088	0.0303822	-0.596677	0.2112	-0.266767	0.609341	-0.357292	0.486867
ENSDARG00000038225	ENSDARG00000038225	nras	turquoise	-0.878529	0.0212367	0.965871	0.00172728	-0.620706	0.188513	0.620831	0.188397	0.773882	0.0709133	-0.759486	0.0798141	-0.392912	0.44096	-0.0775152	0.88396
ENSDARG00000038281	ENSDARG00000038281	natd1	turquoise	-0.896606	0.0154828	0.927	0.00779892	-0.727907	0.10098	0.709187	0.114561	0.862293	0.0271391	-0.751279	0.0851001	-0.4569	0.362341	-0.0159828	0.976028
ENSDARG00000038348	ENSDARG00000038348	pigh	turquoise	-0.883318	0.0196277	0.951615	0.00345499	-0.630093	0.179939	0.490697	0.32303	0.787576	0.0628932	-0.675176	0.14113	-0.308482	0.551955	-0.243186	0.642413
ENSDARG00000038467	ENSDARG00000038467	igsf8	turquoise	-0.694963	0.12538	0.837384	0.0375158	-0.389828	0.444878	0.436896	0.386352	0.176181	0.738463	-0.344564	0.503608	-0.188135	0.721127	-0.242905	0.642809
ENSDARG00000038566	ENSDARG00000038566	gnptg	turquoise	-0.93902	0.00546447	0.933801	0.00642842	-0.828354	0.0416648	0.852442	0.0310536	0.745453	0.0889449	-0.645481	0.166247	-0.478989	0.336463	0.0310669	0.953415
ENSDARG00000038576	ENSDARG00000038576	ube2d1b	turquoise	-0.934636	0.00626904	0.975534	0.00089058	-0.717561	0.108392	0.657814	0.155603	0.805073	0.0532917	-0.731506	0.0984556	-0.352509	0.493138	-0.0955357	0.857132
ENSDARG00000038666	ENSDARG00000038666	igfbp1b	turquoise	-0.814996	0.0481736	0.903773	0.013444	-0.56894	0.238671	0.458961	0.359897	0.390633	0.443855	-0.34697	0.500431	-0.256292	0.623979	-0.373342	0.466006
ENSDARG00000038694	ENSDARG00000038694	zgc:101744	turquoise	-0.829233	0.0412522	0.924937	0.00824012	-0.619297	0.189813	0.714913	0.110326	0.753667	0.0835462	-0.733633	0.0969776	-0.555645	0.252308	0.0118744	0.982189
ENSDARG00000038731	ENSDARG00000038731	slc25a36a	turquoise	-0.846299	0.0336203	0.966462	0.00166838	-0.585632	0.221977	0.508639	0.302838	0.608247	0.200144	-0.513597	0.297343	-0.442334	0.379772	-0.331279	0.521259
ENSDARG00000038788	ENSDARG00000038788	dnai1.2	turquoise	-0.984295	0.000368015	0.976579	0.000816393	-0.813242	0.0490608	0.775614	0.0698749	0.726465	0.101999	-0.681916	0.135674	-0.293674	0.572153	-0.0214066	0.967895
ENSDARG00000038863	ENSDARG00000038863	babam2	turquoise	-0.896061	0.0156435	0.982891	0.00043656	-0.648523	0.163594	0.566431	0.241221	0.610319	0.19819	-0.537103	0.271817	-0.36919	0.471376	-0.279827	0.591215
ENSDARG00000038954	ENSDARG00000038954	ctnnbip1	turquoise	-0.919826	0.00938425	0.981961	0.000485162	-0.684208	0.133841	0.680687	0.136663	0.766681	0.075306	-0.747597	0.0875213	-0.375399	0.463353	-0.055633	0.916637
ENSDARG00000038969	ENSDARG00000038969	zgc:113142	turquoise	-0.91254	0.0111394	0.971399	0.00121531	-0.675373	0.140969	0.557278	0.250617	0.581119	0.226444	-0.510825	0.30041	-0.274558	0.598512	-0.285529	0.583345
ENSDARG00000039064	ENSDARG00000039064	st3gal7	turquoise	-0.907372	0.0124726	0.966516	0.00166302	-0.674431	0.141738	0.610882	0.19766	0.811026	0.0501924	-0.734285	0.0965263	-0.36672	0.474579	-0.122468	0.817217
ENSDARG00000039150	ENSDARG00000039150	lgmn	turquoise	-0.944001	0.00461602	0.983777	0.000392665	-0.735061	0.0959909	0.795394	0.0585126	0.628599	0.181293	-0.679335	0.137753	-0.343034	0.505631	0.0197238	0.970418
ENSDARG00000039243	ENSDARG00000039243	zgc:152791	turquoise	-0.899247	0.0147153	0.975874	0.000866091	-0.669261	0.145993	0.783528	0.065218	0.570792	0.236795	-0.660346	0.153455	-0.400666	0.431161	0.0207768	0.968839
ENSDARG00000039255	ENSDARG00000039255	klhl21	turquoise	-0.966392	0.00167531	0.959923	0.00237707	-0.830239	0.0407819	0.831183	0.040343	0.670971	0.14458	-0.609019	0.199415	-0.384853	0.451221	-0.012991	0.980515
ENSDARG00000039343	ENSDARG00000039343	ahcyl2	turquoise	-0.740474	0.0922905	0.912585	0.011128	-0.395225	0.43803	0.441179	0.381166	0.358672	0.485062	-0.500097	0.31239	-0.280102	0.590835	-0.241191	0.645229
ENSDARG00000039356	ENSDARG00000039356	zgc:194209	turquoise	0.855924	0.0296414	-0.870725	0.0239879	0.784263	0.0647932	-0.566257	0.241399	-0.832723	0.0396322	0.416845	0.410948	0.622097	0.187231	0.375908	0.462697
ENSDARG00000039406	ENSDARG00000039406	prom2	turquoise	-0.952156	0.0033788	0.955885	0.00287621	-0.744347	0.0896834	0.823209	0.04412	0.608898	0.199529	-0.740205	0.092473	-0.190805	0.717266	0.137929	0.794419
ENSDARG00000039459	ENSDARG00000039459	qsox1	turquoise	-0.879426	0.0209305	0.951058	0.00353431	-0.582102	0.225467	0.590538	0.217164	0.457646	0.361456	-0.613053	0.195624	-0.103926	0.844673	-0.0917495	0.862762
ENSDARG00000039477	ENSDARG00000039477	terb2	turquoise	-0.966731	0.00164183	0.988631	0.000193147	-0.782063	0.066069	0.749106	0.0865249	0.72527	0.102847	-0.660082	0.153678	-0.370078	0.470225	-0.0759756	0.886256
ENSDARG00000039516	ENSDARG00000039516	c8a	turquoise	-0.892674	0.0166601	0.883675	0.0195103	-0.70348	0.118851	0.650314	0.162041	0.880894	0.0204345	-0.844468	0.0344041	-0.218394	0.677617	0.0702129	0.894854
ENSDARG00000039517	ENSDARG00000039517	c8b	turquoise	-0.967226	0.00159359	0.960259	0.00233762	-0.765214	0.0762153	0.744097	0.0898501	0.764303	0.0767829	-0.784107	0.0648833	-0.204284	0.697837	0.0548193	0.917853
ENSDARG00000039650	ENSDARG00000039650	itm2cb	turquoise	-0.835133	0.0385313	0.965854	0.00172899	-0.529549	0.279925	0.595163	0.212665	0.460018	0.358647	-0.582133	0.225437	-0.318415	0.53852	-0.14012	0.791196
ENSDARG00000039677	ENSDARG00000039677	dsc2l	turquoise	-0.909989	0.0117882	0.975987	0.000858011	-0.617261	0.191701	0.640796	0.170368	0.557766	0.250113	-0.701941	0.120019	-0.147229	0.780753	-0.0348582	0.947734
ENSDARG00000039684	ENSDARG00000039684	sirt5	turquoise	0.0157878	0.97632	0.297158	0.567382	0.449771	0.370836	-0.0113178	0.983024	-0.0787409	0.882133	-0.541827	0.266793	-0.0582188	0.91277	0.233441	0.656199
ENSDARG00000039830	ENSDARG00000039830	gng5	turquoise	-0.861841	0.0273134	0.974979	0.000931267	-0.555154	0.252817	0.507805	0.303766	0.590476	0.217224	-0.617434	0.19154	-0.277867	0.593927	-0.230749	0.66002
ENSDARG00000039850	ENSDARG00000039850	dusp22b	turquoise	-0.966305	0.00168388	0.982418	0.000460986	-0.791963	0.060417	0.787909	0.0627036	0.687537	0.131196	-0.646576	0.16529	-0.369397	0.471107	-0.0386229	0.942094
ENSDARG00000039863	ENSDARG00000039863	lifrb	turquoise	-0.957771	0.00263722	0.917131	0.0100164	-0.800078	0.0559578	0.871482	0.0237139	0.635946	0.174678	-0.743066	0.090542	-0.163163	0.757427	0.205926	0.695477
ENSDARG00000039914	ENSDARG00000039914	gapdhs	turquoise	-0.79476	0.0588625	0.933597	0.00646763	-0.472184	0.344363	0.406624	0.42368	0.475829	0.340123	-0.505843	0.305953	-0.258631	0.620704	-0.32662	0.527493
ENSDARG00000039980	ENSDARG00000039980	ppt1	turquoise	-0.904387	0.0132757	0.978577	0.000683492	-0.684622	0.133511	0.753313	0.0837758	0.702125	0.119879	-0.711004	0.11321	-0.458931	0.359933	-0.00969062	0.985465
ENSDARG00000040039	ENSDARG00000040039	pttg1ipb	turquoise	-0.81981	0.0457776	0.963789	0.00194307	-0.513246	0.297731	0.564188	0.243511	0.653581	0.159223	-0.705221	0.117535	-0.421945	0.404643	-0.124218	0.814631
ENSDARG00000040121	ENSDARG00000040121	psma2	turquoise	-0.830868	0.0404894	0.974331	0.000979875	-0.529875	0.279573	0.612095	0.196521	0.567904	0.239723	-0.65243	0.160213	-0.422322	0.404179	-0.11482	0.828528
ENSDARG00000040158	ENSDARG00000040158	cdc42l	turquoise	-0.817779	0.0467815	0.958522	0.00254499	-0.499088	0.313527	0.457602	0.361508	0.616977	0.191963	-0.624509	0.185019	-0.342217	0.506714	-0.258462	0.62094
ENSDARG00000040249	ENSDARG00000040249	tlr18	turquoise	-0.757417	0.0811321	0.794483	0.0590155	-0.609172	0.199271	0.936522	0.00591631	0.369309	0.471221	-0.632918	0.177392	-0.361064	0.48194	0.367611	0.473423
ENSDARG00000040251	ENSDARG00000040251	ctsk	turquoise	-0.802326	0.0547507	0.917747	0.00987009	-0.513666	0.297267	0.400634	0.431202	0.443064	0.378893	-0.417975	0.409548	-0.248359	0.635121	-0.384758	0.451342
ENSDARG00000040265	ENSDARG00000040265	mpdu1b	turquoise	-0.820552	0.0454132	0.951745	0.00343665	-0.510233	0.301067	0.458011	0.361023	0.499892	0.312622	-0.523129	0.286887	-0.28967	0.577648	-0.299595	0.564053
ENSDARG00000040314	ENSDARG00000040314	psph	turquoise	-0.927569	0.00767947	0.923398	0.00857716	-0.800211	0.055886	0.661556	0.152433	0.894172	0.0162068	-0.654747	0.158223	-0.444529	0.377127	-0.150419	0.776074
ENSDARG00000040334	ENSDARG00000040334	mat2aa	turquoise	-0.473358	0.342995	0.698609	0.122566	-0.25794	0.621671	0.400057	0.431928	0.170039	0.7474	-0.154332	0.77034	-0.699813	0.121643	-0.327934	0.525733
ENSDARG00000040432	ENSDARG00000040432	klf2b	turquoise	-0.120246	0.820501	0.3622	0.480458	0.347334	0.49995	-0.148461	0.778944	-0.0269073	0.959649	-0.538315	0.270524	0.291769	0.574765	0.0548598	0.917793
ENSDARG00000040445	ENSDARG00000040445	PARP14	turquoise	-0.899888	0.0145321	0.988723	0.000190045	-0.636352	0.174315	0.70087	0.120835	0.552596	0.255477	-0.641626	0.169635	-0.336469	0.514343	-0.062808	0.905912
ENSDARG00000040452	ENSDARG00000040452	fam214a	turquoise	-0.902311	0.0138486	0.90096	0.0142277	-0.766606	0.0753526	0.632016	0.178204	0.920601	0.00920606	-0.694218	0.125958	-0.423561	0.402653	-0.1233	0.815988
ENSDARG00000040453	ENSDARG00000040453	wdfy2	turquoise	-0.890862	0.0172168	0.826919	0.0423432	-0.81548	0.0479304	0.876074	0.0220848	0.817534	0.0469035	-0.784767	0.0645023	-0.328915	0.524419	0.261748	0.616344
ENSDARG00000040455	ENSDARG00000040455	unc50	turquoise	-0.903276	0.013581	0.941332	0.00506189	-0.747475	0.087602	0.836633	0.037853	0.718564	0.107664	-0.691034	0.128443	-0.507255	0.304378	0.0634637	0.904932
ENSDARG00000040474	ENSDARG00000040474	snx10b	turquoise	-0.868184	0.0249182	0.956571	0.0027882	-0.619987	0.189176	0.471292	0.345403	0.595412	0.212423	-0.471653	0.344981	-0.340394	0.509129	-0.380553	0.456726
ENSDARG00000040526	ENSDARG00000040526	s1pr5a	turquoise	-0.931409	0.00689583	0.953212	0.00323249	-0.732654	0.0976569	0.536745	0.2722	0.809271	0.051097	-0.619375	0.189741	-0.302883	0.559569	-0.269988	0.604858
ENSDARG00000040644	ENSDARG00000040644	pxylp1	turquoise	-0.917189	0.0100025	0.953772	0.00315615	-0.764557	0.0766242	0.833578	0.0392397	0.666062	0.148653	-0.626017	0.183641	-0.499875	0.312641	0.00853782	0.987194
ENSDARG00000040657	ENSDARG00000040657	wipi1	turquoise	-0.965928	0.00172159	0.944906	0.00446939	-0.834708	0.0387243	0.787908	0.0627043	0.82477	0.0433679	-0.707976	0.115465	-0.376705	0.461671	0.00289193	0.995662
ENSDARG00000040674	ENSDARG00000040674	ctdsp1	turquoise	-0.925505	0.00811754	0.970557	0.0012876	-0.685056	0.133165	0.794913	0.0587782	0.6458	0.165968	-0.786624	0.0634363	-0.269726	0.605222	0.128517	0.808286
ENSDARG00000040705	ENSDARG00000040705	glsb	turquoise	-0.920728	0.00917691	0.987517	0.000232755	-0.7093	0.114476	0.67913	0.137919	0.740224	0.0924603	-0.651445	0.161063	-0.458877	0.359997	-0.144879	0.784202
ENSDARG00000040712	ENSDARG00000040712	adprh	turquoise	-0.913515	0.0108961	0.961498	0.00219503	-0.722881	0.104552	0.577446	0.230104	0.812524	0.0494265	-0.607484	0.200866	-0.440428	0.382075	-0.264451	0.612571
ENSDARG00000040920	ENSDARG00000040920	si:dkey-49n23.1	turquoise	-0.902293	0.0138535	0.883657	0.0195161	-0.723868	0.103846	0.901516	0.0140711	0.573953	0.233607	-0.793684	0.0594585	-0.15702	0.766406	0.332698	0.519366
ENSDARG00000040971	ENSDARG00000040971	GABARAPL1	turquoise	-0.880496	0.0205683	0.967765	0.00154188	-0.625044	0.18453	0.668283	0.146804	0.465152	0.352593	-0.54539	0.263028	-0.311237	0.548219	-0.122527	0.817129
ENSDARG00000041006	ENSDARG00000041006	st3gal4	turquoise	-0.911976	0.0112814	0.952691	0.00330423	-0.747474	0.0876021	0.653598	0.159208	0.834525	0.0388075	-0.635536	0.175045	-0.504122	0.307875	-0.182494	0.729298
ENSDARG00000041041	ENSDARG00000041041	cxcr3.2	turquoise	-0.757196	0.0812734	0.891232	0.0171024	-0.452651	0.367395	0.356922	0.487352	0.379147	0.458531	-0.385882	0.449907	-0.23404	0.65535	-0.39695	0.435849
ENSDARG00000041060	ENSDARG00000041060	lgals9l3	turquoise	-0.854186	0.0303426	0.955989	0.00286288	-0.566112	0.241546	0.525752	0.284035	0.46601	0.351586	-0.512115	0.298982	-0.243145	0.64247	-0.248077	0.635518
ENSDARG00000041085	ENSDARG00000041085	arpin	turquoise	-0.831787	0.0400634	0.966045	0.00170987	-0.529241	0.280258	0.563136	0.244588	0.477375	0.338332	-0.557579	0.250306	-0.341459	0.507718	-0.194963	0.711261
ENSDARG00000041108	ENSDARG00000041108	ctsh	turquoise	-0.827251	0.0421858	0.943146	0.00475669	-0.518592	0.291846	0.436037	0.387397	0.493685	0.319635	-0.515081	0.295706	-0.225283	0.667792	-0.310691	0.548959
ENSDARG00000041294	ENSDARG00000041294	noxo1a	turquoise	-0.740414	0.092331	0.870414	0.0241007	-0.424413	0.401604	0.417564	0.410057	0.262961	0.61465	-0.400569	0.431283	-0.147872	0.779809	-0.269412	0.60566
ENSDARG00000041301	ENSDARG00000041301	crybb3	turquoise	-0.939125	0.00544587	0.986223	0.000283394	-0.71309	0.111668	0.739422	0.0930048	0.733579	0.0970147	-0.752667	0.0841951	-0.346274	0.50135	0.00313674	0.995295
ENSDARG00000041505	ENSDARG00000041505	itm2bb	turquoise	-0.952714	0.00330111	0.99314	7.04327e-05	-0.737551	0.0942802	0.732993	0.0974211	0.630484	0.179586	-0.63342	0.176941	-0.32221	0.53341	-0.0796519	0.880775
ENSDARG00000041797	ENSDARG00000041797	cx28.9	turquoise	-0.840769	0.036013	0.778448	0.0681905	-0.798575	0.0567719	0.834244	0.0389354	0.866706	0.0254666	-0.749461	0.0862913	-0.41813	0.409357	0.222725	0.671437
ENSDARG00000041802	ENSDARG00000041802	rnf141	turquoise	-0.88225	0.0199812	0.753311	0.0837768	-0.928535	0.00747828	0.797584	0.0573116	0.885941	0.0187721	-0.572809	0.234758	-0.407113	0.423068	0.0477417	0.928442
ENSDARG00000041910	ENSDARG00000041910	znf512	turquoise	-0.905526	0.0129665	0.976437	0.000826282	-0.656295	0.156898	0.763135	0.077513	0.530164	0.279261	-0.665192	0.149379	-0.305922	0.555433	0.0281296	0.957817
ENSDARG00000041911	ENSDARG00000041911	si:ch211-245h14.1	turquoise	-0.847098	0.0332811	0.968112	0.00150905	-0.584447	0.223147	0.615073	0.193736	0.497321	0.315519	-0.519445	0.290912	-0.423083	0.403242	-0.203685	0.698698
ENSDARG00000041959	ENSDARG00000041959	cxcr4b	turquoise	-0.935601	0.00608723	0.980313	0.000577535	-0.737153	0.094553	0.601995	0.206088	0.6832	0.134646	-0.5287	0.280842	-0.377143	0.461107	-0.286252	0.58235
ENSDARG00000042128	ENSDARG00000042128	pacsin1b	turquoise	-0.924838	0.00826178	0.964698	0.0018473	-0.670927	0.144616	0.554169	0.25384	0.590479	0.217221	-0.581172	0.22639	-0.150446	0.776034	-0.214826	0.682718
ENSDARG00000042172	ENSDARG00000042172	c7a	turquoise	-0.91413	0.0107439	0.921118	0.00908819	-0.733101	0.097346	0.462708	0.35547	0.797716	0.0572397	-0.543836	0.264668	-0.266151	0.6102	-0.359452	0.484044
ENSDARG00000042182	ENSDARG00000042182	drc1	turquoise	-0.847958	0.0329179	0.873728	0.0229103	-0.666769	0.148063	0.355644	0.489025	0.822826	0.0443051	-0.508325	0.303186	-0.306344	0.554859	-0.438302	0.384648
ENSDARG00000042409	ENSDARG00000042409	RALGDS	turquoise	-0.909825	0.0118308	0.992095	9.34982e-05	-0.639156	0.17182	0.700629	0.121019	0.580793	0.226768	-0.684204	0.133844	-0.300346	0.563028	-0.0360379	0.945967
ENSDARG00000042496	ENSDARG00000042496	parp12a	turquoise	-0.919949	0.00935573	0.974762	0.000947374	-0.724826	0.103163	0.778812	0.0679752	0.576447	0.231104	-0.585079	0.222522	-0.41884	0.408478	-0.0547692	0.917928
ENSDARG00000042521	ENSDARG00000042521	SLC25A5	turquoise	0.638288	0.172591	-0.742446	0.0909589	0.547899	0.260389	-0.442588	0.379466	-0.773651	0.0710524	0.382666	0.454019	0.814171	0.0485899	0.359945	0.4834
ENSDARG00000042562	ENSDARG00000042562	allc	turquoise	-0.861843	0.0273124	0.855232	0.0299196	-0.744463	0.0896056	0.42318	0.403121	0.888229	0.0180408	-0.491857	0.321711	-0.390715	0.443751	-0.412221	0.416691
ENSDARG00000042660	ENSDARG00000042660	fam32a	turquoise	-0.847544	0.0330924	0.966603	0.00165445	-0.569513	0.23809	0.601515	0.206548	0.717942	0.108115	-0.728029	0.100893	-0.436563	0.386757	-0.102448	0.846866
ENSDARG00000042667	ENSDARG00000042667	klf2a	turquoise	-0.522084	0.288027	0.675977	0.140477	-0.180651	0.731971	0.175631	0.739262	-0.00762827	0.988558	-0.230992	0.659674	0.0525254	0.921284	-0.310013	0.549877
ENSDARG00000042684	ENSDARG00000042684	serpinc1	turquoise	-0.870944	0.0239085	0.909882	0.0118159	-0.660763	0.153103	0.831915	0.0400042	0.708835	0.114824	-0.856464	0.0294252	-0.331502	0.520963	0.255112	0.625634
ENSDARG00000042722	ENSDARG00000042722	blnk	turquoise	-0.817726	0.0468078	0.938585	0.00554195	-0.525587	0.284214	0.434337	0.389463	0.481924	0.333078	-0.46139	0.357026	-0.287079	0.581212	-0.355319	0.489452
ENSDARG00000042725	ENSDARG00000042725	cebpb	turquoise	-0.899789	0.0145603	0.939953	0.00530013	-0.68652	0.132002	0.837527	0.0374518	0.481658	0.333384	-0.655497	0.15758	-0.271273	0.603072	0.131071	0.80452
ENSDARG00000042874	ENSDARG00000042874	phlda2	turquoise	-0.809576	0.0509393	0.861517	0.0274385	-0.593188	0.214581	0.351884	0.493959	0.440123	0.382443	-0.286775	0.58163	-0.17784	0.736052	-0.485392	0.329092
ENSDARG00000042908	ENSDARG00000042908	hsh2d	turquoise	-0.925546	0.00810871	0.98842	0.000200371	-0.677017	0.13963	0.665172	0.149396	0.743757	0.0900781	-0.742994	0.0905903	-0.333651	0.518095	-0.067817	0.89843
ENSDARG00000042934	ENSDARG00000042934	ctgfa	turquoise	-0.859431	0.0282506	0.813676	0.0488408	-0.742946	0.0906223	0.604579	0.203623	0.955562	0.00291821	-0.771623	0.0722782	-0.271466	0.602804	0.00587038	0.991195
ENSDARG00000042995	ENSDARG00000042995	sptlc1	turquoise	-0.865558	0.0258968	0.977089	0.000781387	-0.572601	0.234968	0.604063	0.204114	0.695174	0.125216	-0.746267	0.0884031	-0.361628	0.481204	-0.0824472	0.876609
ENSDARG00000043055	ENSDARG00000043055	hiat1b	turquoise	-0.918781	0.00962692	0.983487	0.000406751	-0.661924	0.152123	0.588967	0.218701	0.586696	0.22093	-0.577994	0.229556	-0.252113	0.629842	-0.211991	0.686777
ENSDARG00000043077	ENSDARG00000043077	nisch	turquoise	-0.877486	0.0215952	0.90263	0.0137597	-0.698356	0.12276	0.669695	0.145633	0.887371	0.0183136	-0.794593	0.0589549	-0.395389	0.437823	0.0110194	0.983471
ENSDARG00000043081	ENSDARG00000043081	ctsz	turquoise	-0.94459	0.00452027	0.914305	0.0107009	-0.827085	0.0422642	0.847398	0.0331543	0.808215	0.0516452	-0.748342	0.087029	-0.370678	0.469449	0.122278	0.817498
ENSDARG00000043093	ENSDARG00000043093	mpeg1.2	turquoise	-0.87659	0.0219052	0.94518	0.00442546	-0.64473	0.166905	0.669723	0.14561	0.417733	0.409848	-0.483319	0.331472	-0.282358	0.587719	-0.138085	0.794189
ENSDARG00000043102	ENSDARG00000043102	lxn	turquoise	-0.966526	0.00166201	0.960165	0.00234859	-0.825076	0.0432214	0.708947	0.11474	0.827412	0.0421097	-0.642647	0.168734	-0.399044	0.433205	-0.134773	0.799065
ENSDARG00000043130	ENSDARG00000043130	notch2	turquoise	-0.924533	0.00832795	0.878193	0.0213519	-0.85528	0.0299004	0.679087	0.137953	0.922518	0.00877259	-0.616101	0.192778	-0.441259	0.381071	-0.139513	0.792088
ENSDARG00000043213	ENSDARG00000043213	adam17a	turquoise	-0.885393	0.0189496	0.952228	0.00336879	-0.649657	0.16261	0.712443	0.112145	0.777364	0.0688324	-0.811585	0.0499057	-0.387485	0.447862	0.0528772	0.920758
ENSDARG00000043359	ENSDARG00000043359	rmnd5b	turquoise	-0.76133	0.0786472	0.910564	0.0116404	-0.437324	0.385834	0.3198	0.536653	0.607101	0.201228	-0.556465	0.251458	-0.310873	0.548713	-0.374562	0.464432
ENSDARG00000043403	ENSDARG00000043403	paox1	turquoise	-0.875288	0.0223597	0.945917	0.00430844	-0.700471	0.12114	0.539106	0.269683	0.694489	0.125748	-0.437892	0.385145	-0.524325	0.285586	-0.394473	0.438983
ENSDARG00000043443	ENSDARG00000043443	kcnj13	turquoise	-0.961135	0.00223639	0.966805	0.00163461	-0.780307	0.0670957	0.623005	0.186397	0.655012	0.157996	-0.520087	0.290209	-0.26499	0.611818	-0.250368	0.632295
ENSDARG00000043475	ENSDARG00000043475	tagapb	turquoise	-0.797412	0.0574056	0.871281	0.0237864	-0.614678	0.194105	0.491194	0.322465	0.370319	0.469913	-0.23488	0.65416	-0.367831	0.473137	-0.417815	0.409746
ENSDARG00000043531	ENSDARG00000043531	jun	turquoise	-0.834027	0.0390344	0.943695	0.00466609	-0.546006	0.262379	0.545134	0.263298	0.407142	0.423032	-0.488786	0.325209	-0.252637	0.629106	-0.220951	0.673967
ENSDARG00000043561	ENSDARG00000043561	psmc1b	turquoise	-0.797193	0.0575253	0.920619	0.00920187	-0.476315	0.33956	0.505763	0.306041	0.348105	0.498933	-0.509466	0.301918	-0.173334	0.742603	-0.183529	0.727798
ENSDARG00000043586	ENSDARG00000043586	fas	turquoise	-0.782215	0.0659805	0.894833	0.0160087	-0.513317	0.297652	0.553151	0.254899	0.284158	0.585235	-0.39571	0.437417	-0.259439	0.619572	-0.207092	0.693803
ENSDARG00000043719	ENSDARG00000043719	c3a.6	turquoise	-0.965341	0.00178109	0.960163	0.00234889	-0.757617	0.0810045	0.635666	0.174928	0.782198	0.0659907	-0.719148	0.107241	-0.182351	0.729505	-0.0940381	0.859359
ENSDARG00000043873	ENSDARG00000043873	arid4a	turquoise	-0.872903	0.0232039	0.982357	0.000464146	-0.562575	0.245162	0.584956	0.222644	0.552367	0.255715	-0.657982	0.155461	-0.256956	0.623049	-0.12633	0.811513
ENSDARG00000043923	ENSDARG00000043923	sox9b	turquoise	-0.77681	0.0691615	0.910021	0.0117801	-0.45414	0.365621	0.343915	0.504466	0.466144	0.351428	-0.473324	0.343035	-0.21177	0.687093	-0.37605	0.462514
ENSDARG00000044073	ENSDARG00000044073	fuca2	turquoise	-0.983164	0.000422792	0.979971	0.000597743	-0.798085	0.0570383	0.69526	0.12515	0.734316	0.0965048	-0.649556	0.162697	-0.261014	0.61737	-0.117745	0.824199
ENSDARG00000044098	ENSDARG00000044098	egr2a	turquoise	-0.869949	0.0242701	0.949577	0.00374968	-0.61563	0.193217	0.610642	0.197887	0.426298	0.399288	-0.486466	0.327862	-0.254412	0.626616	-0.186567	0.723396
ENSDARG00000044167	ENSDARG00000044167	padi2	turquoise	-0.810835	0.0502908	0.960917	0.00226143	-0.51451	0.296336	0.550998	0.257144	0.499536	0.313022	-0.542088	0.266517	-0.423919	0.402212	-0.224969	0.668239
ENSDARG00000044203	ENSDARG00000044203	sumf1	turquoise	-0.946277	0.00425171	0.996854	1.48313e-05	-0.719746	0.106807	0.671321	0.144291	0.719724	0.106824	-0.670621	0.144869	-0.348068	0.498983	-0.130329	0.805614
ENSDARG00000044251	ENSDARG00000044251	rasgef1bb	turquoise	-0.875362	0.0223339	0.941692	0.00500066	-0.678958	0.138057	0.755952	0.0820713	0.449469	0.371198	-0.493726	0.319588	-0.40029	0.431635	-0.0758096	0.886503
ENSDARG00000044254	ENSDARG00000044254	anxa3b	turquoise	-0.908553	0.0121614	0.957876	0.00262425	-0.723537	0.104083	0.625957	0.183697	0.552734	0.255333	-0.429517	0.395345	-0.386699	0.448864	-0.289182	0.578318
ENSDARG00000044267	ENSDARG00000044267	sumo1	turquoise	-0.892348	0.0167596	0.99397	5.44257e-05	-0.614442	0.194325	0.61572	0.193134	0.613035	0.195641	-0.640079	0.171002	-0.35162	0.494307	-0.157602	0.765554
ENSDARG00000044318	ENSDARG00000044318	itgb7	turquoise	-0.856962	0.0292263	0.935615	0.00608476	-0.62675	0.182973	0.467018	0.350403	0.525904	0.28387	-0.393701	0.43996	-0.322751	0.532683	-0.408839	0.420911
ENSDARG00000044328	ENSDARG00000044328	ankrd46a	turquoise	-0.875767	0.022192	0.971499	0.0012069	-0.594638	0.213174	0.568413	0.239205	0.741931	0.0913061	-0.738894	0.0933642	-0.341105	0.508186	-0.128004	0.809042
ENSDARG00000044339	ENSDARG00000044339	rp2	turquoise	-0.829232	0.0412527	0.962534	0.00207927	-0.49051	0.323243	0.495672	0.317383	0.54359	0.264927	-0.653196	0.159554	-0.239333	0.647856	-0.175098	0.740037
ENSDARG00000044387	ENSDARG00000044387	cldn2	turquoise	-0.806658	0.0524578	0.930911	0.00699511	-0.504859	0.307052	0.493089	0.320311	0.388209	0.44694	-0.468365	0.348824	-0.248252	0.635271	-0.259566	0.619395
ENSDARG00000044612	ENSDARG00000044612	c1qb	turquoise	-0.844469	0.0344036	0.951733	0.00343832	-0.593545	0.214235	0.453774	0.366057	0.612896	0.19577	-0.469097	0.347967	-0.406181	0.424235	-0.400477	0.431398
ENSDARG00000044613	ENSDARG00000044613	c1qa	turquoise	-0.872424	0.0233751	0.947969	0.00399043	-0.682014	0.135596	0.527784	0.281833	0.762695	0.0777887	-0.518423	0.292031	-0.518137	0.292346	-0.355712	0.488936
ENSDARG00000044751	ENSDARG00000044751	ddt	turquoise	0.0287883	0.956829	0.283705	0.58586	0.380064	0.457354	-0.136811	0.796064	-0.397796	0.434779	0.0268291	0.959766	-0.172801	0.743378	-0.261678	0.616443
ENSDARG00000044769	ENSDARG00000044769	kctd13	turquoise	-0.905606	0.0129448	0.958733	0.00251925	-0.690655	0.12874	0.527063	0.282613	0.801263	0.0553201	-0.619062	0.190031	-0.375775	0.462868	-0.282569	0.587428
ENSDARG00000044852	ENSDARG00000044852	wbp2nl	turquoise	-0.920567	0.00921383	0.99335	6.61864e-05	-0.642229	0.169103	0.645668	0.166083	0.619381	0.189736	-0.69381	0.126276	-0.244596	0.640422	-0.0827541	0.876152
ENSDARG00000044902	ENSDARG00000044902	atp2b4	turquoise	-0.880164	0.0206804	0.988795	0.000187613	-0.603697	0.204464	0.661198	0.152735	0.562444	0.245297	-0.635258	0.175293	-0.372157	0.467536	-0.103941	0.84465
ENSDARG00000044915	ENSDARG00000044915	sfmbt1	turquoise	-0.941398	0.00505064	0.973614	0.00103511	-0.726572	0.101923	0.801648	0.0551134	0.696733	0.12401	-0.771042	0.0726315	-0.313767	0.544795	0.0950856	0.857801
ENSDARG00000045003	ENSDARG00000045003	vsg1	turquoise	0.939024	0.00546379	-0.88523	0.0190024	0.903525	0.0135123	-0.862898	0.0269068	-0.715456	0.109929	0.516918	0.293685	0.4799	0.335412	0.0219097	0.967141
ENSDARG00000045064	ENSDARG00000045064	ablim1b	turquoise	-0.942045	0.00494083	0.946712	0.0041837	-0.750317	0.0857296	0.541031	0.267637	0.808369	0.0515651	-0.622997	0.186405	-0.2541	0.627053	-0.254905	0.625923
ENSDARG00000045065	ENSDARG00000045065	vti1a	turquoise	-0.839478	0.0365829	0.968996	0.00142694	-0.582788	0.224787	0.672137	0.14362	0.599653	0.208333	-0.627252	0.182516	-0.515639	0.295092	-0.10295	0.846121
ENSDARG00000045141	ENSDARG00000045141	aqp8a.1	turquoise	-0.934355	0.00632246	0.977199	0.000773879	-0.697562	0.123371	0.586484	0.221139	0.60765	0.200709	-0.561767	0.245991	-0.229182	0.662245	-0.230034	0.661035
ENSDARG00000045160	ENSDARG00000045160	msrb1b	turquoise	-0.902409	0.0138213	0.993594	6.14282e-05	-0.653594	0.159212	0.623862	0.185611	0.674334	0.141818	-0.626606	0.183105	-0.417041	0.410706	-0.189337	0.719389
ENSDARG00000045230	ENSDARG00000045230	cox6b1	turquoise	-0.907832	0.0123508	0.993673	5.99161e-05	-0.62443	0.185092	0.66576	0.148904	0.610326	0.198183	-0.707452	0.115857	-0.281123	0.589425	-0.0529301	0.920679
ENSDARG00000045257	ENSDARG00000045257	decr2	turquoise	-0.890782	0.0172416	0.953501	0.00319294	-0.709371	0.114424	0.758078	0.0807101	0.7577	0.0809513	-0.692107	0.127603	-0.533297	0.275891	-0.0229333	0.965606
ENSDARG00000045277	ENSDARG00000045277	rdh12l	turquoise	-0.951391	0.00348681	0.972419	0.00113056	-0.763256	0.0774368	0.796917	0.0576762	0.582937	0.22464	-0.614406	0.194358	-0.311684	0.547614	-0.0100459	0.984932
ENSDARG00000045306	ENSDARG00000045306	slc51a	turquoise	-0.91268	0.0111043	0.926244	0.0079594	-0.697463	0.123447	0.764894	0.0764142	0.434829	0.388865	-0.594678	0.213135	-0.128749	0.807944	0.0555646	0.916739
ENSDARG00000045402	ENSDARG00000045402	commd3	turquoise	-0.840108	0.0363045	0.972592	0.0011165	-0.534747	0.274336	0.601237	0.206813	0.492246	0.321268	-0.604139	0.204042	-0.340314	0.509235	-0.134656	0.799237
ENSDARG00000045417	ENSDARG00000045417	fam49bb	turquoise	-0.78729	0.0630564	0.938469	0.00556262	-0.476265	0.339618	0.404825	0.425935	0.53894	0.269859	-0.509798	0.30155	-0.362615	0.479918	-0.356836	0.487465
ENSDARG00000045506	ENSDARG00000045506	gramd4b	turquoise	-0.741104	0.0918642	0.890919	0.017199	-0.43499	0.388669	0.482428	0.332497	0.735121	0.0959495	-0.771199	0.0725359	-0.423022	0.403317	-0.0842689	0.873896
ENSDARG00000045515	ENSDARG00000045515	kin	turquoise	-0.69293	0.126961	0.866096	0.0256951	-0.381568	0.455425	0.528688	0.280855	0.220064	0.675232	-0.422477	0.403988	-0.332185	0.52005	-0.150566	0.775858
ENSDARG00000045530	ENSDARG00000045530	si:ch211-244b2.4	turquoise	-0.884698	0.0191754	0.980511	0.000566041	-0.62966	0.180331	0.747605	0.0875154	0.603457	0.204692	-0.703356	0.118944	-0.408285	0.421602	0.0163851	0.975425
ENSDARG00000045561	ENSDARG00000045561	dram1	turquoise	-0.862064	0.0272274	0.95368	0.00316863	-0.59126	0.216458	0.433346	0.39067	0.641748	0.169526	-0.536925	0.272007	-0.29338	0.572556	-0.361593	0.48125
ENSDARG00000045568	ENSDARG00000045568	bcat1	turquoise	-0.791592	0.0606246	0.77627	0.0694833	-0.628621	0.181272	0.84938	0.0323211	0.234644	0.654494	-0.547079	0.261251	-0.0483284	0.927564	0.301701	0.56118
ENSDARG00000045626	ENSDARG00000045626	nek8	turquoise	-0.815279	0.0480312	0.935624	0.006083	-0.490674	0.323057	0.418914	0.408387	0.480944	0.334207	-0.537302	0.271605	-0.185221	0.725346	-0.289276	0.578189
ENSDARG00000045658	ENSDARG00000045658	msrb3	turquoise	-0.871469	0.0237188	0.965389	0.00177618	-0.585881	0.221733	0.46609	0.351492	0.640149	0.17094	-0.589192	0.21848	-0.269316	0.605793	-0.297997	0.566237
ENSDARG00000045676	ENSDARG00000045676	calua	turquoise	-0.855454	0.0298304	0.934613	0.00627336	-0.662002	0.152057	0.473883	0.342384	0.748202	0.0871212	-0.479984	0.335315	-0.503462	0.308615	-0.413324	0.415319
ENSDARG00000045733	ENSDARG00000045733	ciapin1	turquoise	-0.527751	0.281868	0.666761	0.148069	-0.125253	0.813104	0.330684	0.522054	0.0144173	0.978375	-0.565191	0.242486	0.2626	0.615154	0.127643	0.809575
ENSDARG00000045827	ENSDARG00000045827	lyrm5b	turquoise	-0.906946	0.0125858	0.925435	0.00813265	-0.767039	0.0750849	0.622415	0.186939	0.539054	0.269738	-0.352065	0.493722	-0.378857	0.458904	-0.32682	0.527224
ENSDARG00000045835	ENSDARG00000045835	si:dkey-14d8.6	turquoise	0.456158	0.363222	-0.499285	0.313305	0.162861	0.757868	-0.596219	0.211643	-0.0338117	0.949302	0.764468	0.0766796	-0.346239	0.501396	-0.675089	0.141201
ENSDARG00000045836	ENSDARG00000045836	mapk11	turquoise	-0.842056	0.0354493	0.967947	0.00152465	-0.560162	0.247641	0.550955	0.257189	0.703017	0.119201	-0.676494	0.140056	-0.439527	0.383164	-0.184641	0.726186
ENSDARG00000045850	ENSDARG00000045850	ccdc167	turquoise	-0.884981	0.0190832	0.955733	0.00289593	-0.64558	0.16616	0.822595	0.0444169	0.572964	0.234602	-0.746234	0.0884251	-0.347355	0.499922	0.151417	0.77461
ENSDARG00000045999	ENSDARG00000045999	saa	turquoise	-0.687012	0.131612	0.835655	0.0382944	-0.364302	0.477721	0.307683	0.55304	0.246579	0.637627	-0.333746	0.517968	-0.160862	0.760789	-0.375233	0.463567
ENSDARG00000046022	ENSDARG00000046022	tmed7	turquoise	-0.851343	0.0315058	0.935748	0.00605994	-0.641229	0.169985	0.537502	0.271391	0.821577	0.0449119	-0.632675	0.17761	-0.50879	0.302669	-0.25183	0.63024
ENSDARG00000046030	ENSDARG00000046030	zgc:110339	turquoise	-0.901284	0.0141364	0.947749	0.004024	-0.650732	0.161679	0.781075	0.066646	0.680813	0.136561	-0.852552	0.0310084	-0.243185	0.642413	0.18953	0.719109
ENSDARG00000046053	ENSDARG00000046053	slc27a6	turquoise	-0.799733	0.0561441	0.800952	0.0554868	-0.670837	0.14469	0.932644	0.00665238	0.338757	0.511302	-0.573065	0.234501	-0.271322	0.603004	0.317279	0.540051
ENSDARG00000046054	ENSDARG00000046054	SLC27A3	turquoise	-0.905825	0.0128857	0.93073	0.00703127	-0.719309	0.107124	0.815458	0.0479415	0.450025	0.370532	-0.560851	0.246933	-0.272619	0.601203	0.0470569	0.929467
ENSDARG00000046107	ENSDARG00000046107	caskin1	turquoise	-0.904613	0.0132141	0.994798	4.0525e-05	-0.621638	0.187654	0.646775	0.165116	0.606337	0.201952	-0.682436	0.135258	-0.295502	0.569648	-0.0907755	0.864211
ENSDARG00000046132	ENSDARG00000046132	dynlt3	turquoise	-0.911521	0.0113964	0.985991	0.000293015	-0.668541	0.146589	0.564744	0.242943	0.705213	0.117541	-0.605112	0.203116	-0.365513	0.476147	-0.256748	0.62334
ENSDARG00000046142	ENSDARG00000046142	si:ch211-170d8.5	turquoise	-0.981692	0.000499687	0.944512	0.0045329	-0.834764	0.0386988	0.810982	0.0502151	0.771051	0.0726257	-0.738978	0.0933067	-0.2542	0.626912	0.0745541	0.888376
ENSDARG00000051710	ENSDARG00000051710	CR339041.1	turquoise	-0.726128	0.102238	0.886447	0.0186094	-0.440327	0.382197	0.668896	0.146295	0.293091	0.572952	-0.521336	0.288843	-0.413051	0.415659	-0.00262157	0.996068
ENSDARG00000051768	ENSDARG00000051768	fhod1	turquoise	-0.863264	0.0267668	0.873613	0.0229511	-0.699191	0.122119	0.589914	0.217773	0.928452	0.00749559	-0.760027	0.0794706	-0.367966	0.472962	-0.0679908	0.898171
ENSDARG00000051795	ENSDARG00000051795	si:dkeyp-110c12.3	turquoise	-0.736861	0.0947529	0.870774	0.0239701	-0.427344	0.398005	0.305	0.556686	0.369462	0.471023	-0.36833	0.47249	-0.197515	0.70758	-0.427651	0.397629
ENSDARG00000051890	ENSDARG00000051890	hp	turquoise	-0.329804	0.52323	0.430924	0.393624	-0.266228	0.610093	-0.173851	0.741851	0.575404	0.232149	0.0475622	0.92871	-0.567781	0.239848	-0.839007	0.036792
ENSDARG00000051957	ENSDARG00000051957	selm	turquoise	-0.815407	0.0479667	0.936701	0.00588342	-0.49859	0.314088	0.523079	0.286942	0.387166	0.448269	-0.529403	0.280083	-0.199864	0.704197	-0.183414	0.727964
ENSDARG00000052074	ENSDARG00000052074	si:ch211-122f10.4	turquoise	-0.972509	0.00112327	0.972467	0.00112664	-0.770178	0.0731578	0.65335	0.159421	0.767622	0.0747251	-0.691653	0.127959	-0.222495	0.671765	-0.114225	0.829408
ENSDARG00000052082	ENSDARG00000052082	gabarapb	turquoise	-0.898635	0.0148915	0.969698	0.00136344	-0.670108	0.145292	0.619963	0.189199	0.798614	0.0567506	-0.708359	0.115179	-0.425255	0.40057	-0.140238	0.791022
ENSDARG00000052139	ENSDARG00000052139	notch3	turquoise	-0.850649	0.0317927	0.978792	0.000669903	-0.544973	0.263467	0.551468	0.256653	0.556338	0.25159	-0.610037	0.198456	-0.337512	0.512956	-0.197354	0.707812
ENSDARG00000052158	ENSDARG00000052158	il23r	turquoise	-0.967826	0.00153606	0.978324	0.000699706	-0.793439	0.0595947	0.799386	0.056332	0.656778	0.156486	-0.640408	0.170711	-0.337611	0.512824	-0.0187922	0.971815
ENSDARG00000052322	ENSDARG00000052322	tlr5b	turquoise	-0.82777	0.0419403	0.925185	0.00818647	-0.537218	0.271695	0.355953	0.48862	0.640833	0.170335	-0.547947	0.260339	-0.231125	0.659486	-0.379493	0.458087
ENSDARG00000052371	ENSDARG00000052371	higd2a	turquoise	-0.887174	0.0183763	0.973603	0.00103604	-0.648387	0.163712	0.62793	0.1819	0.7691	0.0738172	-0.703611	0.118751	-0.448802	0.371997	-0.132028	0.803109
ENSDARG00000052396	ENSDARG00000052396	pkz	turquoise	-0.890958	0.017187	0.896208	0.0156	-0.743478	0.0902655	0.929207	0.0073401	0.572799	0.234769	-0.703486	0.118846	-0.351403	0.494591	0.250754	0.631753
ENSDARG00000052423	ENSDARG00000052423	ppp1r12c	turquoise	-0.860512	0.0278282	0.888157	0.0180637	-0.640396	0.170721	0.842102	0.0354292	0.663838	0.150513	-0.886844	0.0184821	-0.235259	0.653622	0.333101	0.518829
ENSDARG00000052518	ENSDARG00000052518	stx4	turquoise	-0.832072	0.0399321	0.969156	0.00141233	-0.503981	0.308034	0.508987	0.30245	0.5657	0.241966	-0.644268	0.167309	-0.297693	0.566651	-0.190333	0.717948
ENSDARG00000052575	ENSDARG00000052575	arl13a	turquoise	0.373865	0.465331	-0.532518	0.276728	0.251793	0.630293	-0.705498	0.117326	-0.253365	0.628084	0.458359	0.360611	0.710805	0.113358	-0.318464	0.538454
ENSDARG00000052690	ENSDARG00000052690	arrdc3a	turquoise	-0.928635	0.00745781	0.881747	0.0201487	-0.818743	0.0463038	0.619446	0.189676	0.92968	0.00724342	-0.675425	0.140926	-0.31372	0.544858	-0.131097	0.804482
ENSDARG00000052693	ENSDARG00000052693	si:dkey-172m14.1	turquoise	-0.828708	0.0414985	0.939099	0.0054505	-0.502096	0.310146	0.468444	0.348732	0.452073	0.368086	-0.565811	0.241853	-0.141217	0.789583	-0.215926	0.681145
ENSDARG00000052746	ENSDARG00000052746	grinab	turquoise	-0.88392	0.0194299	0.980046	0.000593297	-0.592614	0.215139	0.533211	0.275983	0.59081	0.216898	-0.605707	0.202551	-0.263594	0.613766	-0.227018	0.665322
ENSDARG00000052783	ENSDARG00000052783	cdc42ep3	turquoise	-0.883311	0.01963	0.965809	0.00173352	-0.583348	0.224234	0.517658	0.292871	0.554942	0.253037	-0.611673	0.196917	-0.164324	0.755732	-0.202074	0.701015
ENSDARG00000052859	ENSDARG00000052859	chp1	turquoise	-0.839775	0.0364512	0.943823	0.00464506	-0.524492	0.285404	0.416894	0.410887	0.565334	0.24234	-0.581463	0.226102	-0.179355	0.733852	-0.289631	0.577702
ENSDARG00000052950	ENSDARG00000052950	arhgap23a	turquoise	-0.740696	0.09214	0.889469	0.0176506	-0.413039	0.415674	0.339284	0.510601	0.376529	0.461898	-0.421251	0.405499	-0.218828	0.676997	-0.374046	0.465098
ENSDARG00000052978	ENSDARG00000052978	mbnl1	turquoise	-0.544411	0.26406	0.727883	0.100997	-0.242129	0.643904	0.687782	0.131002	0.113197	0.830929	-0.587537	0.220104	-0.324464	0.530383	0.300955	0.562197
ENSDARG00000052997	ENSDARG00000052997	sema4e	turquoise	-0.972884	0.00109292	0.962496	0.00208348	-0.828794	0.0414579	0.825009	0.0432537	0.735319	0.0958126	-0.676423	0.140113	-0.366671	0.474642	0.0188058	0.971795
ENSDARG00000053005	ENSDARG00000053005	cd22	turquoise	-0.768142	0.074405	0.921931	0.00890427	-0.445049	0.376502	0.416738	0.411081	0.412908	0.415837	-0.466975	0.350453	-0.291569	0.57504	-0.320929	0.535134
ENSDARG00000053010	ENSDARG00000053010	lpcat2	turquoise	-0.814676	0.048335	0.835965	0.0381544	-0.663501	0.150796	0.340319	0.509228	0.874598	0.0226024	-0.499553	0.313003	-0.372759	0.466759	-0.443147	0.378792
ENSDARG00000053087	ENSDARG00000053087	mthfr	turquoise	-0.913713	0.0108469	0.979358	0.000634734	-0.64247	0.16889	0.622213	0.187125	0.736921	0.0947116	-0.768582	0.0741347	-0.264027	0.613162	-0.0625545	0.906291
ENSDARG00000053091	ENSDARG00000053091	DAB2 (1 of many)	turquoise	-0.859249	0.0283221	0.896703	0.0154544	-0.658269	0.155216	0.899903	0.0145276	0.533234	0.275959	-0.765082	0.0762973	-0.302325	0.560328	0.302369	0.560269
ENSDARG00000053129	ENSDARG00000053129	carhsp1	turquoise	-0.861905	0.0272886	0.803167	0.054302	-0.817532	0.0469042	0.856154	0.0295493	0.848973	0.0324912	-0.731328	0.0985797	-0.435634	0.387886	0.2043	0.697813
ENSDARG00000053136	ENSDARG00000053136	b2m	turquoise	-0.834292	0.0389135	0.950216	0.00365603	-0.539695	0.269056	0.495313	0.31779	0.460401	0.358194	-0.494568	0.318633	-0.269417	0.605653	-0.28067	0.59005
ENSDARG00000053291	ENSDARG00000053291	pnrc2	turquoise	-0.821958	0.0447266	0.955124	0.00297558	-0.50995	0.301381	0.567973	0.239653	0.426504	0.399036	-0.558577	0.249275	-0.288862	0.578758	-0.158367	0.764435
ENSDARG00000053358	ENSDARG00000053358	basp1	turquoise	-0.749321	0.0863834	0.89467	0.0160574	-0.434216	0.389611	0.407642	0.422406	0.331232	0.521322	-0.407462	0.422632	-0.241871	0.644269	-0.323694	0.531417
ENSDARG00000053405	ENSDARG00000053405	sord	turquoise	-0.404921	0.425814	0.651765	0.160787	-0.0442499	0.933669	0.181613	0.730575	0.536416	0.272551	-0.679492	0.137626	-0.413059	0.415649	-0.0871175	0.869654
ENSDARG00000053468	ENSDARG00000053468	adam10a	turquoise	-0.911991	0.0112776	0.934299	0.00633303	-0.736432	0.0950472	0.483735	0.330994	0.782331	0.065913	-0.509992	0.301335	-0.346904	0.500518	-0.385018	0.45101
ENSDARG00000053476	ENSDARG00000053476	lipca	turquoise	-0.912145	0.0112387	0.90495	0.0131224	-0.7764	0.0694059	0.765598	0.0759772	0.872373	0.0233936	-0.770767	0.0727986	-0.409211	0.420445	0.0644925	0.903395
ENSDARG00000053484	ENSDARG00000053484	syne2b	turquoise	-0.939561	0.00536883	0.946326	0.00424403	-0.771456	0.07238	0.567718	0.239912	0.838675	0.0369393	-0.606119	0.20216	-0.345511	0.502357	-0.264833	0.612038
ENSDARG00000053561	ENSDARG00000053561	ms4a17a.11	turquoise	-0.876868	0.0218089	0.887244	0.0183542	-0.64718	0.164763	0.409866	0.419628	0.802765	0.0545159	-0.665159	0.149407	-0.11264	0.831755	-0.249533	0.63347
ENSDARG00000053802	ENSDARG00000053802	cbln5	turquoise	-0.910608	0.0116292	0.941266	0.00507315	-0.728358	0.100662	0.712793	0.111886	0.847928	0.0329306	-0.763802	0.0770958	-0.421005	0.405803	-0.00881227	0.986782
ENSDARG00000053810	ENSDARG00000053810	hnrnpc	turquoise	-0.857218	0.0291248	0.916254	0.0102264	-0.645512	0.16622	0.564439	0.243254	0.872599	0.0233126	-0.739902	0.0926786	-0.41628	0.411649	-0.128362	0.808514
ENSDARG00000053831	ENSDARG00000053831	vtnb	turquoise	-0.841328	0.0357677	0.83254	0.0397162	-0.712339	0.112222	0.595459	0.212378	0.95387	0.00314292	-0.74885	0.0866936	-0.385743	0.450084	-0.0442226	0.933709
ENSDARG00000053979	ENSDARG00000053979	bc2	turquoise	-0.811585	0.0499058	0.954389	0.00307309	-0.500898	0.311491	0.475436	0.340579	0.666053	0.14866	-0.660578	0.153259	-0.390137	0.444486	-0.227628	0.664455
ENSDARG00000054208	ENSDARG00000054208	phkg2	turquoise	-0.932339	0.00671223	0.984621	0.000352964	-0.733519	0.0970567	0.758448	0.0804741	0.717856	0.108178	-0.681875	0.135708	-0.443988	0.377778	-0.0443933	0.933454
ENSDARG00000054271	ENSDARG00000054271	cdkn1bb	turquoise	-0.860339	0.0278957	0.960081	0.00235847	-0.571727	0.235851	0.626909	0.182829	0.432426	0.391791	-0.57093	0.236656	-0.241431	0.64489	-0.107574	0.839261
ENSDARG00000054292	ENSDARG00000054292	si:ch211-14a17.11	turquoise	-0.944368	0.00455622	0.925382	0.00814405	-0.733272	0.0972276	0.541432	0.267212	0.758376	0.08052	-0.67472	0.141502	-0.0789659	0.881797	-0.160107	0.761891
ENSDARG00000054319	ENSDARG00000054319	oxct1b	turquoise	-0.783089	0.0654724	0.914944	0.010544	-0.517321	0.293242	0.690861	0.128578	0.674824	0.141417	-0.782721	0.0656866	-0.498502	0.314187	0.081367	0.878219
ENSDARG00000054418	ENSDARG00000054418	ssuh2.2	turquoise	-0.907847	0.012347	0.960085	0.002358	-0.702684	0.119454	0.818743	0.0463035	0.528851	0.280679	-0.625454	0.184156	-0.363687	0.478521	0.0477348	0.928452
ENSDARG00000054433	ENSDARG00000054433	yipf6	turquoise	-0.915596	0.0103855	0.993445	6.43156e-05	-0.653222	0.159532	0.595263	0.212567	0.685891	0.132501	-0.657268	0.156068	-0.324075	0.530906	-0.183388	0.728002
ENSDARG00000054447	ENSDARG00000054447	slc29a1b	turquoise	-0.864747	0.026203	0.76207	0.078181	-0.821057	0.0451661	0.804429	0.0536319	0.87928	0.0209802	-0.784593	0.064603	-0.247714	0.636029	0.250206	0.632523
ENSDARG00000054510	ENSDARG00000054510	adrb2b	turquoise	-0.946377	0.00423608	0.916208	0.0102375	-0.825206	0.0431589	0.824263	0.0436118	0.829634	0.0410646	-0.753231	0.083829	-0.364225	0.477822	0.0994766	0.851277
ENSDARG00000054539	ENSDARG00000054539	lrp10	turquoise	-0.911514	0.0113982	0.988073	0.000212538	-0.637343	0.173432	0.717959	0.108103	0.624594	0.184942	-0.751841	0.0847333	-0.282425	0.587626	0.028113	0.957842
ENSDARG00000054543	ENSDARG00000054543	samsn1a	turquoise	-0.783347	0.0653234	0.913999	0.0107763	-0.475273	0.340769	0.34229	0.506617	0.500763	0.311642	-0.458397	0.360566	-0.257327	0.622529	-0.409944	0.419531
ENSDARG00000054609	ENSDARG00000054609	slco2b1	turquoise	-0.90984	0.0118268	0.87942	0.0209328	-0.830361	0.040725	0.781069	0.0666494	0.885264	0.0189914	-0.688347	0.130556	-0.478652	0.336854	0.0169833	0.974527
ENSDARG00000054666	ENSDARG00000054666	pgpep1	turquoise	-0.918075	0.00979257	0.970543	0.00128876	-0.679951	0.137256	0.74013	0.092524	0.50234	0.309871	-0.613285	0.195406	-0.25145	0.630774	-0.0194465	0.970834
ENSDARG00000054771	ENSDARG00000054771	ghra	turquoise	-0.936204	0.00597506	0.883746	0.0194869	-0.883063	0.019712	0.810924	0.0502451	0.8546	0.0301748	-0.630954	0.179161	-0.467693	0.349612	-0.00610018	0.99085
ENSDARG00000054827	ENSDARG00000054827	ssuh2.4	turquoise	-0.790466	0.061257	0.9314	0.00689759	-0.490188	0.323611	0.447996	0.372963	0.4317	0.392676	-0.447558	0.373488	-0.324264	0.530652	-0.332964	0.519011
ENSDARG00000054842	ENSDARG00000054842	hsd17b14	turquoise	-0.843005	0.0350365	0.950178	0.00366157	-0.545416	0.263001	0.682016	0.135594	0.408038	0.421911	-0.627727	0.182085	-0.240457	0.646266	0.00631508	0.990528
ENSDARG00000054864	ENSDARG00000054864	aplp2	turquoise	-0.858613	0.0285722	0.981288	0.000521907	-0.55008	0.258104	0.579841	0.227714	0.544127	0.264361	-0.633669	0.176717	-0.309797	0.55017	-0.15058	0.775837
ENSDARG00000054931	ENSDARG00000054931	ppp2r5b	turquoise	-0.701352	0.120468	0.839576	0.0365396	-0.398765	0.433557	0.372865	0.466622	0.218889	0.676911	-0.317592	0.539629	-0.183344	0.728066	-0.334939	0.516379
ENSDARG00000054973	ENSDARG00000054973	itsn2b	turquoise	-0.833663	0.039201	0.93294	0.00659485	-0.567562	0.24007	0.490136	0.32367	0.798985	0.0565492	-0.715072	0.11021	-0.38568	0.450165	-0.195118	0.711037
ENSDARG00000055036	ENSDARG00000055036	itih3a	turquoise	-0.976675	0.000809747	0.946451	0.00422446	-0.794719	0.0588854	0.674435	0.141735	0.795384	0.0585181	-0.72714	0.101521	-0.164496	0.755481	-0.0481035	0.9279
ENSDARG00000055092	ENSDARG00000055092	pora	turquoise	-0.896954	0.0153807	0.967175	0.00159857	-0.642249	0.169085	0.786083	0.063746	0.629918	0.180098	-0.789451	0.0618292	-0.317712	0.539467	0.132142	0.802941
ENSDARG00000055101	ENSDARG00000055101	hmox2a	turquoise	-0.823205	0.0441219	0.953279	0.00322334	-0.566722	0.240925	0.725329	0.102805	0.565961	0.2417	-0.661654	0.15235	-0.508877	0.302572	-0.00195502	0.997067
ENSDARG00000055108	ENSDARG00000055108	gde1	turquoise	-0.956104	0.00284794	0.984694	0.000349617	-0.759911	0.0795443	0.792191	0.0602898	0.650367	0.161995	-0.667239	0.147672	-0.343766	0.504663	-0.00323024	0.995155
ENSDARG00000055120	ENSDARG00000055120	ctsba	turquoise	-0.792748	0.059979	0.903503	0.0135183	-0.545183	0.263246	0.68417	0.133871	0.741536	0.091572	-0.809249	0.0511086	-0.484258	0.330393	0.0873336	0.869333
ENSDARG00000055138	ENSDARG00000055138	zgc:110410	turquoise	-0.935871	0.00603686	0.922919	0.00868314	-0.78021	0.0671529	0.616652	0.192266	0.894959	0.0159708	-0.699068	0.122214	-0.319684	0.53681	-0.138528	0.793537
ENSDARG00000055185	ENSDARG00000055185	tm4sf5	turquoise	-0.988468	0.00019873	0.938567	0.00554502	-0.876842	0.0218179	0.733924	0.0967762	0.824087	0.0436962	-0.636603	0.174091	-0.309853	0.550095	-0.0958394	0.856681
ENSDARG00000055186	ENSDARG00000055186	ccr9a	turquoise	-0.85741	0.0290482	0.909905	0.0118099	-0.649567	0.162688	0.37419	0.464911	0.686268	0.132202	-0.428573	0.396499	-0.309571	0.550478	-0.482199	0.332761
ENSDARG00000055252	ENSDARG00000055252	snap23.2	turquoise	-0.769263	0.0737172	0.897403	0.0152492	-0.462652	0.355537	0.354548	0.490462	0.405145	0.425533	-0.40794	0.422034	-0.215764	0.681377	-0.393494	0.440223
ENSDARG00000055278	ENSDARG00000055278	cfb	turquoise	-0.942101	0.00493138	0.91817	0.00977031	-0.749758	0.0860966	0.604727	0.203482	0.843472	0.034834	-0.758402	0.0805035	-0.148483	0.778912	-0.0618246	0.907381
ENSDARG00000055290	ENSDARG00000055290	mpeg1.1	turquoise	-0.801678	0.0550975	0.943302	0.00473084	-0.519309	0.29106	0.426426	0.399131	0.593873	0.213916	-0.49785	0.314923	-0.432905	0.391207	-0.379794	0.4577
ENSDARG00000055291	ENSDARG00000055291	rab18a	turquoise	-0.833168	0.0394276	0.96491	0.00182536	-0.530485	0.278916	0.528867	0.280661	0.685425	0.132871	-0.697725	0.123246	-0.390503	0.44402	-0.170151	0.747236
ENSDARG00000055365	ENSDARG00000055365	si:dkey-25e12.3	turquoise	-0.878923	0.0211021	0.96027	0.00233641	-0.604972	0.203249	0.495704	0.317346	0.544599	0.263862	-0.52191	0.288216	-0.226933	0.665443	-0.295348	0.56986
ENSDARG00000055388	ENSDARG00000055388	vtna	turquoise	-0.903373	0.0135541	0.979846	0.000605174	-0.643628	0.167872	0.761427	0.0785859	0.625697	0.183934	-0.760398	0.0792357	-0.328016	0.525623	0.0751225	0.887528
ENSDARG00000055416	ENSDARG00000055416	serpinb1	turquoise	-0.97752	0.000752317	0.980192	0.000584623	-0.816572	0.0473827	0.761044	0.0788277	0.724716	0.103241	-0.629673	0.180319	-0.362719	0.479781	-0.0865489	0.870501
ENSDARG00000055502	ENSDARG00000055502	cicb	turquoise	-0.783039	0.0655019	0.903216	0.0135973	-0.470376	0.346472	0.492627	0.320836	0.309525	0.55054	-0.466137	0.351436	-0.162184	0.758856	-0.201738	0.701498
ENSDARG00000055504	ENSDARG00000055504	si:ch211-212k18.7	turquoise	-0.926481	0.00790888	0.961853	0.002155	-0.682736	0.135017	0.791553	0.0606467	0.646811	0.165085	-0.809554	0.050951	-0.217877	0.678356	0.157364	0.765902
ENSDARG00000055550	ENSDARG00000055550	FO834888.1	turquoise	-0.842069	0.0354435	0.944558	0.0045255	-0.555624	0.252329	0.428389	0.396725	0.536696	0.272251	-0.492028	0.321516	-0.251432	0.630799	-0.356737	0.487594
ENSDARG00000055569	ENSDARG00000055569	ghdc	turquoise	-0.813416	0.0489726	0.963523	0.00197156	-0.519482	0.290871	0.546619	0.261734	0.627422	0.182362	-0.631368	0.178787	-0.471793	0.344819	-0.198004	0.706875
ENSDARG00000055648	ENSDARG00000055648	cpda	turquoise	-0.895709	0.0157479	0.988731	0.000189782	-0.620414	0.188782	0.644834	0.166813	0.696589	0.124122	-0.736721	0.0948487	-0.354273	0.490823	-0.0721357	0.891984
ENSDARG00000055705	ENSDARG00000055705	f5	turquoise	-0.966955	0.00161993	0.970222	0.00131689	-0.791131	0.0608833	0.780494	0.0669863	0.774451	0.0705717	-0.735806	0.0954778	-0.3352	0.516031	0.0190607	0.971412
ENSDARG00000055723	ENSDARG00000055723	hsp70l	turquoise	-0.802485	0.0546655	0.910481	0.0116617	-0.505163	0.306712	0.505878	0.305914	0.331291	0.521244	-0.455338	0.364196	-0.172429	0.74392	-0.217566	0.6788
ENSDARG00000055809	ENSDARG00000055809	vtg2	turquoise	0.530935	0.278431	-0.75865	0.0803453	0.15011	0.776526	-0.394177	0.439357	-0.509933	0.3014	0.796448	0.057933	0.357253	0.486918	-0.0904626	0.864676
ENSDARG00000055897	ENSDARG00000055897	zgc:154093	turquoise	-0.908532	0.012167	0.979055	0.000653422	-0.657246	0.156087	0.710874	0.113306	0.512402	0.298665	-0.609053	0.199383	-0.285538	0.583334	-0.0589934	0.911613
ENSDARG00000055901	ENSDARG00000055901	steap4	turquoise	-0.816069	0.0476347	0.93454	0.00628733	-0.51473	0.296093	0.38587	0.449922	0.542347	0.266243	-0.498481	0.31421	-0.259823	0.619035	-0.375587	0.463111
ENSDARG00000055912	ENSDARG00000055912	nipa2	turquoise	-0.927264	0.0077434	0.999362	6.09994e-07	-0.683267	0.134592	0.666592	0.14821	0.651511	0.161006	-0.640192	0.170902	-0.359468	0.484023	-0.139156	0.792613
ENSDARG00000055917	ENSDARG00000055917	nipa1	turquoise	-0.83429	0.0389144	0.969717	0.0013617	-0.522773	0.287276	0.552554	0.255521	0.499468	0.313099	-0.585306	0.222299	-0.326592	0.527529	-0.188618	0.720428
ENSDARG00000055938	ENSDARG00000055938	tspan14	turquoise	-0.894431	0.0161291	0.975682	0.00087984	-0.658115	0.155348	0.55412	0.253891	0.750523	0.0855944	-0.620302	0.188885	-0.419069	0.408194	-0.259692	0.619219
ENSDARG00000055945	ENSDARG00000055945	asph	turquoise	-0.309103	0.551112	0.41974	0.407365	-0.163151	0.757445	0.741104	0.0918642	0.186626	0.723312	-0.652978	0.159741	-0.383688	0.45271	0.674902	0.141353
ENSDARG00000055969	ENSDARG00000055969	rfc3	turquoise	-0.758253	0.0805981	0.835035	0.0385754	-0.530184	0.27924	0.794439	0.05904	0.223709	0.670035	-0.535296	0.273749	-0.231437	0.659042	0.189024	0.71984
ENSDARG00000056001	ENSDARG00000056001	fryb	turquoise	0.950874	0.0035608	-0.896113	0.015628	0.790241	0.0613839	-0.825073	0.043223	-0.730172	0.0993882	0.81869	0.0463298	0.111386	0.833612	-0.227819	0.664184
ENSDARG00000056047	ENSDARG00000056047	noxa1	turquoise	-0.756104	0.0819739	0.938202	0.00561054	-0.431418	0.393021	0.519207	0.291172	0.466615	0.350876	-0.564439	0.243254	-0.438581	0.38431	-0.193878	0.712827
ENSDARG00000056065	ENSDARG00000056065	mov10b.2	turquoise	-0.8513	0.0315237	0.797878	0.0571515	-0.769994	0.0732704	0.821392	0.0450024	0.316201	0.541506	-0.375812	0.462821	-0.171949	0.744618	0.0638884	0.904298
ENSDARG00000056108	ENSDARG00000056108	ndufa4	turquoise	-0.788975	0.0620986	0.90199	0.0139382	-0.516391	0.294263	0.334917	0.516408	0.501884	0.310383	-0.383958	0.452366	-0.286477	0.58204	-0.474692	0.341443
ENSDARG00000056369	ENSDARG00000056369	ufsp2	turquoise	-0.876289	0.0220099	0.970844	0.00126268	-0.591829	0.215904	0.614711	0.194074	0.475162	0.340898	-0.576	0.231552	-0.250111	0.632656	-0.139277	0.792435
ENSDARG00000056376	ENSDARG00000056376	ankrd37	turquoise	-0.949056	0.00382678	0.982495	0.000456959	-0.746189	0.0884546	0.75044	0.085649	0.586653	0.220972	-0.596965	0.210922	-0.315116	0.542971	-0.0730182	0.890667
ENSDARG00000056379	ENSDARG00000056379	si:ch73-86n18.1	turquoise	-0.891931	0.0168872	0.964523	0.00186565	-0.652933	0.15978	0.677532	0.139213	0.467509	0.349827	-0.525549	0.284255	-0.303202	0.559134	-0.131462	0.803942
ENSDARG00000056396	ENSDARG00000056396	dusp22a	turquoise	-0.892358	0.0167565	0.916859	0.0100812	-0.708336	0.115196	0.804799	0.0534362	0.412148	0.416783	-0.529658	0.279807	-0.258037	0.621534	0.0384408	0.942367
ENSDARG00000056479	ENSDARG00000056479	rab1bb	turquoise	-0.844688	0.0343094	0.884641	0.019194	-0.676059	0.14041	0.409721	0.419809	0.855771	0.029703	-0.525856	0.283922	-0.423007	0.403335	-0.408323	0.421555
ENSDARG00000056525	ENSDARG00000056525	bcar1	turquoise	-0.984591	0.00035431	0.940588	0.00518979	-0.83914	0.0367328	0.813476	0.0489422	0.757432	0.0811223	-0.735426	0.095739	-0.226201	0.666485	0.0831702	0.875532
ENSDARG00000056532	ENSDARG00000056532	serinc2	turquoise	-0.928399	0.00750657	0.960745	0.00228113	-0.75491	0.0827426	0.846918	0.0333573	0.621348	0.187921	-0.653086	0.159648	-0.413456	0.415155	0.0571985	0.914296
ENSDARG00000056541	ENSDARG00000056541	nr0b1	turquoise	-0.922881	0.00869172	0.921989	0.00889109	-0.671258	0.144344	0.533549	0.27562	0.69834	0.122773	-0.718243	0.107896	-0.00831197	0.987532	-0.0967215	0.85537
ENSDARG00000056603	ENSDARG00000056603	mcf2b	turquoise	-0.954747	0.00302546	0.925393	0.00814157	-0.841851	0.0355389	0.845535	0.0339466	0.798277	0.0569339	-0.714181	0.110864	-0.389827	0.44488	0.0812049	0.87846
ENSDARG00000056615	ENSDARG00000056615	cybb	turquoise	-0.813336	0.0490131	0.927393	0.00771634	-0.550723	0.257432	0.372675	0.466867	0.659893	0.153838	-0.488647	0.325368	-0.387994	0.447214	-0.437149	0.386046
ENSDARG00000056642	ENSDARG00000056642	hdac9b	turquoise	-0.783748	0.0650911	0.915137	0.0104969	-0.483543	0.331214	0.406555	0.423766	0.411603	0.417462	-0.419741	0.407364	-0.266374	0.60989	-0.364687	0.477221
ENSDARG00000056659	ENSDARG00000056659	ttbk1b	turquoise	-0.959841	0.00238672	0.982922	0.000435016	-0.767846	0.074587	0.757854	0.0808529	0.614484	0.194286	-0.603749	0.204413	-0.316947	0.540499	-0.0721642	0.891942
ENSDARG00000056713	ENSDARG00000056713	pskh1	turquoise	-0.875172	0.0224004	0.89943	0.014663	-0.72775	0.10109	0.916683	0.0101235	0.545223	0.263204	-0.653233	0.159522	-0.416458	0.411427	0.199403	0.704859
ENSDARG00000056795	ENSDARG00000056795	serpine1	turquoise	-0.942326	0.00489346	0.93354	0.00647868	-0.810126	0.0506557	0.891204	0.017111	0.62561	0.184013	-0.643314	0.168147	-0.370207	0.470058	0.108286	0.838205
ENSDARG00000056804	ENSDARG00000056804	IL4I1	turquoise	-0.682494	0.135211	0.831558	0.0401697	-0.361426	0.481467	0.288282	0.579556	0.254284	0.626795	-0.322845	0.532558	-0.164608	0.755318	-0.399177	0.433037
ENSDARG00000056888	ENSDARG00000056888	dnah5l	turquoise	-0.954851	0.00301162	0.899715	0.0145812	-0.870468	0.0240812	0.716824	0.10893	0.898245	0.0150044	-0.653267	0.159493	-0.371388	0.46853	-0.0855885	0.871931
ENSDARG00000056909	ENSDARG00000056909	ERBB4 (1 of many)	turquoise	-0.93258	0.00666488	0.987707	0.000225756	-0.726977	0.101637	0.666211	0.148528	0.756403	0.0817819	-0.646081	0.165722	-0.433676	0.390268	-0.165155	0.754519
ENSDARG00000057035	ENSDARG00000057035	stoml3b	turquoise	-0.824241	0.043622	0.870409	0.0241027	-0.629718	0.180278	0.347921	0.499176	0.838068	0.0372097	-0.537941	0.270923	-0.348448	0.498482	-0.420562	0.406349
ENSDARG00000057058	ENSDARG00000057058	minpp1a	turquoise	-0.94373	0.00466036	0.904942	0.0131244	-0.807795	0.0518639	0.603217	0.204921	0.898945	0.0148021	-0.675961	0.14049	-0.267506	0.608312	-0.152318	0.77329
ENSDARG00000057230	ENSDARG00000057230	nceh1b.2	turquoise	-0.962053	0.00213269	0.912156	0.0112359	-0.835797	0.0382303	0.886849	0.0184803	0.70474	0.117897	-0.739516	0.0929404	-0.241399	0.644935	0.190137	0.718232
ENSDARG00000057392	ENSDARG00000057392	lrrc31	turquoise	-0.922527	0.00877054	0.975399	0.000900342	-0.671896	0.143817	0.553902	0.254117	0.749193	0.0864677	-0.678241	0.138638	-0.26579	0.610703	-0.199568	0.704622
ENSDARG00000057452	ENSDARG00000057452	ston2	turquoise	-0.781987	0.0661133	0.94586	0.00431741	-0.436024	0.387412	0.528309	0.281264	0.436466	0.386875	-0.610133	0.198365	-0.300657	0.562604	-0.135455	0.79806
ENSDARG00000057498	ENSDARG00000057498	habp2	turquoise	-0.963627	0.00196038	0.9269	0.00782019	-0.846609	0.0334886	0.732823	0.097539	0.873178	0.0231059	-0.691872	0.127787	-0.354874	0.490035	-0.0539527	0.919149
ENSDARG00000057577	ENSDARG00000057577	mbtps2	turquoise	-0.908708	0.0121209	0.974281	0.000983691	-0.656372	0.156832	0.53246	0.27679	0.745247	0.0890821	-0.65307	0.159662	-0.304965	0.556734	-0.238113	0.649581
ENSDARG00000057676	ENSDARG00000057676	golga7	turquoise	-0.851554	0.0314186	0.980609	0.000560372	-0.542385	0.266202	0.563235	0.244486	0.617057	0.19189	-0.675394	0.140952	-0.352654	0.492948	-0.152908	0.772426
ENSDARG00000057698	ENSDARG00000057698	ctsd	turquoise	-0.92372	0.00850607	0.928698	0.00744463	-0.753896	0.0833978	0.80155	0.0551661	0.809403	0.0510288	-0.808269	0.0516173	-0.353841	0.49139	0.129446	0.806916
ENSDARG00000057706	ENSDARG00000057706	si:ch211-137i24.10	turquoise	-0.76351	0.0772783	0.90561	0.0129439	-0.443072	0.378882	0.436366	0.386996	0.33947	0.510355	-0.443824	0.377976	-0.22608	0.666658	-0.281285	0.5892
ENSDARG00000057714	ENSDARG00000057714	cmah	turquoise	-0.784976	0.0643819	0.924359	0.00836602	-0.482696	0.332189	0.388582	0.446464	0.474874	0.341232	-0.444819	0.376778	-0.312809	0.546091	-0.389752	0.444975
ENSDARG00000057853	ENSDARG00000057853	atp6v0ca	turquoise	-0.84773	0.0330141	0.966668	0.001648	-0.554932	0.253047	0.47188	0.344716	0.647617	0.164383	-0.59969	0.208297	-0.349439	0.497176	-0.290743	0.576175
ENSDARG00000057884	ENSDARG00000057884	zgc:114174	turquoise	-0.935561	0.00609471	0.999181	1.00551e-06	-0.695659	0.12484	0.696185	0.124434	0.680775	0.136591	-0.684511	0.133599	-0.35243	0.493242	-0.0860757	0.871205
ENSDARG00000057921	ENSDARG00000057921	ccdc136b	turquoise	-0.731403	0.0985275	0.907401	0.012465	-0.394923	0.438412	0.575705	0.231848	0.316543	0.541045	-0.561396	0.246373	-0.32722	0.526689	-0.0624128	0.906502
ENSDARG00000057942	ENSDARG00000057942	glt8d2	turquoise	-0.831833	0.0400425	0.944432	0.00454595	-0.541503	0.267137	0.420331	0.406635	0.541708	0.26692	-0.492183	0.32134	-0.279574	0.591564	-0.365489	0.476178
ENSDARG00000058044	ENSDARG00000058044	rab1ba	turquoise	-0.902441	0.0138123	0.981553	0.000507323	-0.630925	0.179187	0.676058	0.140411	0.712751	0.111917	-0.78415	0.0648584	-0.317908	0.539202	-0.00200919	0.996986
ENSDARG00000058045	ENSDARG00000058045	tlr21	turquoise	-0.777698	0.0686346	0.796055	0.058149	-0.623092	0.186317	0.311144	0.548345	0.908039	0.0122963	-0.554422	0.253578	-0.337674	0.512741	-0.386401	0.449244
ENSDARG00000058062	ENSDARG00000058062	magt1	turquoise	-0.92072	0.00917892	0.959806	0.00239087	-0.680317	0.136961	0.612903	0.195764	0.807534	0.0519997	-0.77484	0.0703382	-0.262606	0.615146	-0.0714764	0.892968
ENSDARG00000058128	ENSDARG00000058128	msna	turquoise	-0.776484	0.0693558	0.929006	0.00738125	-0.449516	0.371141	0.46723	0.350154	0.391436	0.442834	-0.497054	0.315821	-0.28013	0.590797	-0.252894	0.628746
ENSDARG00000058159	ENSDARG00000058159	ipo8	turquoise	-0.710971	0.113234	0.849188	0.0324014	-0.41923	0.407996	0.376836	0.461502	0.247543	0.63627	-0.304912	0.556806	-0.22956	0.661709	-0.365768	0.475815
ENSDARG00000058160	ENSDARG00000058160	tnfaip2b	turquoise	-0.840565	0.036103	0.904806	0.0131616	-0.647539	0.16445	0.413239	0.415425	0.816768	0.0472851	-0.523724	0.286239	-0.443849	0.377946	-0.413295	0.415356
ENSDARG00000058180	ENSDARG00000058180	exoc3l4	turquoise	-0.81061	0.0504064	0.824662	0.0434197	-0.678171	0.138695	0.895559	0.0157924	0.324567	0.530246	-0.504946	0.306954	-0.311856	0.547381	0.206262	0.694995
ENSDARG00000058206	ENSDARG00000058206	si:ch211-153b23.5	turquoise	-0.700523	0.1211	0.847564	0.0330841	-0.378309	0.459608	0.329996	0.522974	0.259511	0.619472	-0.350601	0.495647	-0.169541	0.748124	-0.359505	0.483975
ENSDARG00000058212	ENSDARG00000058212	ndnl2	turquoise	-0.826246	0.042663	0.868962	0.0246313	-0.680265	0.137002	0.918716	0.00964219	0.544207	0.264276	-0.66886	0.146325	-0.477861	0.337768	0.24366	0.641743
ENSDARG00000058231	ENSDARG00000058231	nt5c2b	turquoise	-0.909901	0.0118112	0.968419	0.00148026	-0.66098	0.15292	0.73565	0.0955846	0.489738	0.324123	-0.625926	0.183725	-0.237507	0.650439	-0.0036581	0.994513
ENSDARG00000058285	ENSDARG00000058285	cpt1b	turquoise	-0.356574	0.487807	0.553117	0.254935	-0.210329	0.689159	0.275502	0.597203	-0.0127189	0.980923	0.109066	0.83705	-0.643536	0.167953	-0.453731	0.366109
ENSDARG00000058302	ENSDARG00000058302	sh3bgrl	turquoise	-0.888428	0.0179781	0.967144	0.00160156	-0.6702	0.145216	0.544531	0.263934	0.614767	0.194022	-0.466249	0.351305	-0.414104	0.414349	-0.350407	0.495901
ENSDARG00000058327	ENSDARG00000058327	neu3.3	turquoise	0.920983	0.00911884	-0.916463	0.0101761	0.821457	0.0449708	-0.887207	0.018366	-0.672662	0.143188	0.605275	0.202961	0.488909	0.325069	-0.0643579	0.903596
ENSDARG00000058351	ENSDARG00000058351	tapbpl	turquoise	-0.806095	0.0527533	0.923381	0.00858082	-0.522637	0.287423	0.404128	0.426809	0.466685	0.350793	-0.418711	0.408638	-0.281657	0.588686	-0.397143	0.435604
ENSDARG00000058358	ENSDARG00000058358	krt8	turquoise	-0.973717	0.00102714	0.94042	0.00521892	-0.807933	0.0517921	0.788088	0.0626021	0.77936	0.0676524	-0.777606	0.0686887	-0.210703	0.688623	0.0956289	0.856994
ENSDARG00000058389	ENSDARG00000058389	ccl19a.1	turquoise	-0.732699	0.0976256	0.867585	0.0251398	-0.421884	0.404719	0.408395	0.421465	0.260926	0.617493	-0.376643	0.461751	-0.178672	0.734843	-0.296237	0.568643
ENSDARG00000058488	ENSDARG00000058488	adora2ab	turquoise	-0.831173	0.0403477	0.898179	0.0150234	-0.50969	0.30167	0.435207	0.388405	0.44797	0.372994	-0.595052	0.212772	0.0391717	0.941273	-0.165728	0.753684
ENSDARG00000058647	ENSDARG00000058647	hck	turquoise	-0.84285	0.0351035	0.947523	0.00405847	-0.564603	0.243087	0.449192	0.37153	0.523052	0.286971	-0.472471	0.344028	-0.284614	0.584607	-0.358088	0.485826
ENSDARG00000058693	ENSDARG00000058693	cast	turquoise	-0.948769	0.00386968	0.997135	1.22995e-05	-0.712772	0.111902	0.662267	0.151834	0.699183	0.122125	-0.672958	0.142945	-0.303788	0.558336	-0.125888	0.812165
ENSDARG00000058731	ENSDARG00000058731	slc2a6	turquoise	-0.733808	0.096856	0.880639	0.0205202	-0.414195	0.414237	0.366547	0.474803	0.322138	0.533507	-0.390525	0.443992	-0.218028	0.67814	-0.352593	0.493028
ENSDARG00000058871	ENSDARG00000058871	si:ch73-142c19.1	turquoise	-0.887802	0.0181765	0.961832	0.00215735	-0.624561	0.184972	0.613666	0.19505	0.463731	0.354265	-0.533944	0.275197	-0.224531	0.668864	-0.165214	0.754434
ENSDARG00000058992	ENSDARG00000058992	cers2b	turquoise	-0.871593	0.0236741	0.955954	0.0028673	-0.543976	0.264519	0.541141	0.267521	0.590613	0.21709	-0.743019	0.0905734	-0.100415	0.849884	-0.0633286	0.905134
ENSDARG00000059003	ENSDARG00000059003	strip2	turquoise	-0.738192	0.0938422	0.869752	0.024342	-0.418765	0.408571	0.340566	0.508901	0.32173	0.534056	-0.389978	0.444688	-0.149464	0.777473	-0.359545	0.483922
ENSDARG00000059049	ENSDARG00000059049	zgc:174904	turquoise	-0.863835	0.026549	0.877916	0.021447	-0.743487	0.0902593	0.856319	0.0294833	0.417089	0.410645	-0.456899	0.362342	-0.396038	0.437001	0.0410761	0.93842
ENSDARG00000059231	ENSDARG00000059231	hephl1a	turquoise	-0.835864	0.0381998	0.902368	0.0138326	-0.595191	0.212638	0.340954	0.508387	0.742556	0.0908847	-0.530076	0.279357	-0.276081	0.596399	-0.425561	0.400194
ENSDARG00000059294	ENSDARG00000059294	marco	turquoise	-0.85029	0.0319417	0.925329	0.00815547	-0.684714	0.133437	0.504468	0.307488	0.734946	0.0960702	-0.43423	0.389593	-0.565818	0.241847	-0.420862	0.405979
ENSDARG00000059365	ENSDARG00000059365	nipal4	turquoise	-0.907414	0.0124615	0.972693	0.0011083	-0.627981	0.181854	0.675783	0.140635	0.50961	0.301758	-0.662135	0.151945	-0.172556	0.743734	-0.0247591	0.962869
ENSDARG00000059507	ENSDARG00000059507	si:dkey-163m14.2	turquoise	-0.941931	0.00496019	0.970451	0.00129685	-0.731986	0.0981217	0.824994	0.0432606	0.644454	0.167147	-0.742383	0.0910011	-0.299588	0.564062	0.109603	0.836255
ENSDARG00000059610	ENSDARG00000059610	gpr146	turquoise	-0.949151	0.00381274	0.975268	0.000909972	-0.740135	0.0925207	0.806871	0.0523463	0.602238	0.205856	-0.687287	0.131395	-0.279079	0.59225	0.0565284	0.915298
ENSDARG00000059642	ENSDARG00000059642	mtmr14	turquoise	-0.88671	0.0185251	0.966512	0.00166336	-0.592692	0.215064	0.722924	0.104521	0.59967	0.208317	-0.809356	0.0510533	-0.219155	0.676531	0.118484	0.823106
ENSDARG00000059746	ENSDARG00000059746	plod1a	turquoise	-0.908406	0.0122	0.96294	0.00203469	-0.665611	0.149029	0.542204	0.266393	0.794672	0.058911	-0.695527	0.124943	-0.301694	0.561188	-0.198699	0.705874
ENSDARG00000059804	ENSDARG00000059804	retreg3	turquoise	-0.92831	0.00752504	0.928309	0.00752523	-0.761727	0.0783971	0.645621	0.166125	0.89051	0.0173257	-0.734374	0.0964647	-0.343897	0.504491	-0.0880437	0.868276
ENSDARG00000059824	ENSDARG00000059824	soat2	turquoise	-0.885069	0.0190547	0.926691	0.00786423	-0.702887	0.1193	0.886006	0.0187513	0.550023	0.258164	-0.681894	0.135692	-0.391448	0.442819	0.175172	0.739929
ENSDARG00000059846	ENSDARG00000059846	epg5	turquoise	-0.788172	0.062554	0.753003	0.0839772	-0.656922	0.156363	0.934942	0.00621111	0.327185	0.526736	-0.649105	0.163088	-0.0961822	0.856172	0.447688	0.373332
ENSDARG00000059906	ENSDARG00000059906	sdc4	turquoise	-0.932402	0.00669978	0.975949	0.000860754	-0.723999	0.103752	0.579848	0.227707	0.775193	0.0701266	-0.615104	0.193707	-0.366479	0.474892	-0.252841	0.62882
ENSDARG00000059933	ENSDARG00000059933	plpp3	turquoise	-0.845268	0.0340606	0.952749	0.00329624	-0.5458	0.262597	0.437815	0.385239	0.559494	0.248329	-0.540771	0.267913	-0.245191	0.639584	-0.320606	0.535568
ENSDARG00000060006	ENSDARG00000060006	nedd4l	turquoise	-0.939091	0.00545196	0.933151	0.00655373	-0.808973	0.0512514	0.728365	0.100657	0.870756	0.0239765	-0.69189	0.127773	-0.43776	0.385305	-0.0654633	0.901945
ENSDARG00000060007	ENSDARG00000060007	n4bp3	turquoise	-0.643087	0.168347	0.685565	0.13276	-0.535809	0.2732	0.363769	0.478415	0.140374	0.790822	0.0411639	0.938289	-0.284832	0.584306	-0.499151	0.313455
ENSDARG00000060069	ENSDARG00000060069	isoc1	turquoise	-0.885566	0.0188933	0.882342	0.0199508	-0.693116	0.126816	0.827191	0.0422141	0.386003	0.449753	-0.607057	0.201271	-0.103947	0.844641	0.176991	0.737285
ENSDARG00000060153	ENSDARG00000060153	h6pd	turquoise	-0.949417	0.00377328	0.993641	6.05226e-05	-0.713861	0.111099	0.737785	0.0941209	0.646057	0.165743	-0.700993	0.120741	-0.282869	0.587013	-0.0179837	0.973027
ENSDARG00000060325	ENSDARG00000060325	fam20cl	turquoise	0.929791	0.00722098	-0.883438	0.0195881	0.756696	0.0815936	-0.768158	0.0743955	-0.791104	0.0608986	0.858784	0.028505	0.111181	0.833916	-0.211265	0.687817
ENSDARG00000060374	ENSDARG00000060374	ttll11	turquoise	-0.97855	0.000685208	0.942958	0.00478782	-0.793058	0.0598061	0.752086	0.0845734	0.631602	0.178577	-0.680091	0.137143	-0.0926668	0.861398	0.0353552	0.946989
ENSDARG00000060469	ENSDARG00000060469	pik3r4	turquoise	-0.90968	0.0118682	0.997624	8.45918e-06	-0.642696	0.168692	0.667175	0.147725	0.625008	0.184563	-0.670976	0.144576	-0.344422	0.503796	-0.097626	0.854026
ENSDARG00000060596	ENSDARG00000060596	prkaa1	turquoise	-0.876767	0.0218437	0.988761	0.00018876	-0.580378	0.227179	0.64326	0.168195	0.610914	0.19763	-0.709188	0.11456	-0.338886	0.51113	-0.065824	0.901407
ENSDARG00000060661	ENSDARG00000060661	klf8	turquoise	0.954086	0.0031138	-0.917083	0.0100278	0.882933	0.0197548	-0.791496	0.0606786	-0.818707	0.0463213	0.587179	0.220455	0.476551	0.339286	0.0810469	0.878696
ENSDARG00000060734	ENSDARG00000060734	appl1	turquoise	-0.922618	0.00875023	0.93699	0.0058303	-0.718009	0.108067	0.723584	0.104049	0.825241	0.0431425	-0.830923	0.040464	-0.284287	0.585058	0.0797193	0.880674
ENSDARG00000060841	ENSDARG00000060841	pik3c2a	turquoise	-0.904936	0.0131261	0.981144	0.000529975	-0.648006	0.164043	0.692141	0.127576	0.515036	0.295756	-0.603725	0.204437	-0.289844	0.577409	-0.0813868	0.878189
ENSDARG00000060977	ENSDARG00000060977	zgc:153018	turquoise	-0.89708	0.0153437	0.929199	0.00734163	-0.729864	0.0996036	0.780979	0.0667021	0.81225	0.0495661	-0.76552	0.0760256	-0.465018	0.352751	0.0684255	0.897522
ENSDARG00000061057	ENSDARG00000061057	cyhr1	turquoise	-0.947494	0.00406302	0.93776	0.00569022	-0.77066	0.0728641	0.736733	0.0948409	0.83978	0.0364494	-0.796696	0.0577973	-0.279273	0.591981	0.0516189	0.92264
ENSDARG00000061177	ENSDARG00000061177	mov10b.1	turquoise	-0.814346	0.0485018	0.822491	0.0444678	-0.678125	0.138731	0.873909	0.0228462	0.298982	0.56489	-0.482562	0.332344	-0.265095	0.611673	0.18249	0.729303
ENSDARG00000061194	ENSDARG00000061194	hectd2	turquoise	-0.891597	0.0169899	0.916978	0.0100529	-0.760579	0.0791218	0.573574	0.233989	0.864992	0.0261105	-0.550639	0.257519	-0.522244	0.287853	-0.299657	0.563968
ENSDARG00000061383	ENSDARG00000061383	serpinf2b	turquoise	-0.962369	0.00209747	0.979524	0.000624613	-0.770015	0.0732576	0.727364	0.101363	0.785292	0.0642004	-0.722857	0.104569	-0.33987	0.509824	-0.0467674	0.9299
ENSDARG00000061436	ENSDARG00000061436	col6a2	turquoise	0.755321	0.0824774	-0.715291	0.11005	0.739799	0.0927487	-0.703293	0.118992	-0.925052	0.00821536	0.662504	0.151634	0.549921	0.25827	-0.0772868	0.884301
ENSDARG00000061520	ENSDARG00000061520	b4galnt1a	turquoise	-0.820178	0.0455968	0.934762	0.00624512	-0.499889	0.312625	0.488628	0.325389	0.408814	0.420941	-0.533259	0.275931	-0.163767	0.756545	-0.211031	0.688152
ENSDARG00000061543	ENSDARG00000061543	ccdc85b	turquoise	-0.848759	0.032581	0.970202	0.00131861	-0.570029	0.237567	0.535559	0.273467	0.534704	0.274383	-0.521233	0.288956	-0.377219	0.461009	-0.277034	0.595079
ENSDARG00000061660	ENSDARG00000061660	CABZ01055347.1	turquoise	-0.887765	0.0181883	0.968914	0.00143451	-0.630011	0.180013	0.706417	0.116635	0.46971	0.347251	-0.591227	0.216491	-0.288827	0.578807	-0.0528841	0.920748
ENSDARG00000061684	ENSDARG00000061684	slc25a17	turquoise	-0.964308	0.00188818	0.994915	3.87249e-05	-0.754322	0.0831221	0.721733	0.105375	0.691617	0.127986	-0.664107	0.150288	-0.317447	0.539824	-0.0844518	0.873623
ENSDARG00000061735	ENSDARG00000061735	hnrnpm	turquoise	-0.138652	0.793355	0.431758	0.392606	0.27737	0.594615	-0.157575	0.765594	0.25602	0.624361	-0.508636	0.30284	-0.180384	0.732358	-0.172709	0.743512
ENSDARG00000061844	ENSDARG00000061844	si:dkey-38p12.3	turquoise	-0.701997	0.119976	0.791714	0.0605565	-0.426895	0.398556	0.251372	0.630884	0.81256	0.049408	-0.700018	0.121486	-0.218943	0.676833	-0.250944	0.631485
ENSDARG00000061895	ENSDARG00000061895	usp32	turquoise	-0.926108	0.00798834	0.961277	0.00222023	-0.685371	0.132914	0.637546	0.173251	0.798234	0.0569575	-0.790813	0.0610618	-0.248167	0.635392	-0.0352546	0.94714
ENSDARG00000061896	ENSDARG00000061896	slco2a1	turquoise	-0.864504	0.0262951	0.901767	0.0140007	-0.730183	0.0993804	0.628956	0.180969	0.46852	0.348642	-0.29761	0.566765	-0.435869	0.3876	-0.324555	0.530262
ENSDARG00000061908	ENSDARG00000061908	mfsd12a	turquoise	-0.809618	0.0509176	0.894329	0.0161595	-0.587773	0.219872	0.858893	0.0284619	0.542132	0.26647	-0.760413	0.0792266	-0.41991	0.407155	0.261675	0.616447
ENSDARG00000061921	ENSDARG00000061921	gltpa	turquoise	-0.87823	0.021339	0.831857	0.0400312	-0.740559	0.092233	0.688737	0.130248	0.905596	0.0129475	-0.841851	0.0355387	-0.213479	0.684646	0.13854	0.793519
ENSDARG00000061948	ENSDARG00000061948	amotl2b	turquoise	-0.808688	0.0513993	0.950939	0.00355141	-0.504312	0.307663	0.557401	0.25049	0.424745	0.401196	-0.525505	0.284303	-0.342419	0.506445	-0.194373	0.712112
ENSDARG00000061952	ENSDARG00000061952	si:dkey-245p14.7	turquoise	-0.815401	0.0479701	0.934614	0.00627322	-0.4737	0.342597	0.516353	0.294306	0.406039	0.424413	-0.608685	0.19973	-0.122315	0.817443	-0.11692	0.82542
ENSDARG00000062054	ENSDARG00000062054	cpt1ab	turquoise	-0.95123	0.00350975	0.930589	0.0070597	-0.832178	0.0398832	0.674754	0.141474	0.879894	0.0207718	-0.637061	0.173683	-0.405979	0.424488	-0.157162	0.766197
ENSDARG00000062087	ENSDARG00000062087	nceh1b.1	turquoise	-0.911331	0.0114446	0.956208	0.00283466	-0.750244	0.0857773	0.587489	0.220151	0.689689	0.129499	-0.447124	0.374009	-0.475808	0.340148	-0.355705	0.488945
ENSDARG00000062116	ENSDARG00000062116	ctdsplb	turquoise	-0.643922	0.167613	0.718038	0.108046	-0.332647	0.519434	0.721366	0.105639	0.219654	0.675819	-0.815787	0.0477758	0.093788	0.859731	0.523329	0.28667
ENSDARG00000062132	ENSDARG00000062132	cyp4v8	turquoise	0.906017	0.012834	-0.926002	0.00801093	0.750164	0.0858296	-0.68162	0.135912	-0.882499	0.0198986	0.718163	0.107955	0.455561	0.363931	0.0744927	0.888468
ENSDARG00000062178	ENSDARG00000062178	fam65a	turquoise	-0.936931	0.00584102	0.972151	0.00115257	-0.729097	0.100142	0.678725	0.138246	0.813106	0.04913	-0.739011	0.093284	-0.361894	0.480857	-0.0727418	0.89108
ENSDARG00000062204	ENSDARG00000062204	sigirr	turquoise	-0.97965	0.000616976	0.976226	0.000841068	-0.819955	0.0457062	0.778496	0.0681623	0.741189	0.0918064	-0.663137	0.151102	-0.348765	0.498064	-0.0439704	0.934087
ENSDARG00000062220	ENSDARG00000062220	plekha7b	turquoise	-0.864684	0.0262269	0.985572	0.000310732	-0.591092	0.216622	0.642167	0.169157	0.595648	0.212195	-0.632176	0.178059	-0.434144	0.389699	-0.132953	0.801745
ENSDARG00000062263	ENSDARG00000062263	arhgap17b	turquoise	-0.814974	0.0481849	0.898117	0.0150415	-0.597583	0.210325	0.431339	0.393118	0.843516	0.0348151	-0.618762	0.190309	-0.453835	0.365985	-0.314843	0.543341
ENSDARG00000062267	ENSDARG00000062267	kdm3b	turquoise	-0.869323	0.0244988	0.973015	0.00108245	-0.548179	0.260096	0.603119	0.205015	0.522503	0.287569	-0.692593	0.127224	-0.19171	0.715958	-0.057368	0.914042
ENSDARG00000062280	ENSDARG00000062280	hace1	turquoise	-0.798292	0.0569256	0.895912	0.0156875	-0.557558	0.250327	0.796758	0.0577631	0.34263	0.506166	-0.586779	0.220848	-0.342525	0.506305	0.129767	0.806442
ENSDARG00000062349	ENSDARG00000062349	arhgap15	turquoise	-0.815849	0.0477448	0.898832	0.0148347	-0.553567	0.254466	0.337279	0.513266	0.521914	0.288212	-0.399847	0.432193	-0.204992	0.696819	-0.45973	0.358987
ENSDARG00000062352	ENSDARG00000062352	sema4ab	turquoise	0.516767	0.29385	-0.555831	0.252114	0.427909	0.397313	0.0899537	0.865433	-0.632101	0.178127	0.0512989	0.923119	0.343591	0.504894	0.819411	0.0459737
ENSDARG00000062374	ENSDARG00000062374	leng9	turquoise	-0.958196	0.00258478	0.98271	0.000445845	-0.76427	0.0768034	0.800375	0.0557976	0.664991	0.149548	-0.684993	0.133215	-0.339532	0.510273	0.0160689	0.975899
ENSDARG00000062381	ENSDARG00000062381	si:ch211-238n5.4	turquoise	-0.920832	0.00915329	0.985654	0.000307225	-0.683806	0.134162	0.59535	0.212483	0.612035	0.196577	-0.548547	0.25971	-0.321013	0.53502	-0.24887	0.634402
ENSDARG00000062430	ENSDARG00000062430	gpd2	turquoise	-0.826907	0.042349	0.935026	0.00619533	-0.537679	0.271203	0.498982	0.313646	0.409277	0.420363	-0.464258	0.353645	-0.232011	0.658228	-0.270435	0.604237
ENSDARG00000062445	ENSDARG00000062445	pias1b	turquoise	-0.817718	0.046812	0.95109	0.00352983	-0.517718	0.292806	0.428568	0.396505	0.574901	0.232654	-0.529344	0.280146	-0.347002	0.500389	-0.346138	0.501529
ENSDARG00000062460	ENSDARG00000062460	sgk3	turquoise	-0.788724	0.062241	0.823757	0.0438552	-0.645197	0.166495	0.77177	0.0721895	0.820351	0.0455114	-0.809713	0.0508685	-0.496116	0.31688	0.20202	0.701092
ENSDARG00000062467	ENSDARG00000062467	stra6l	turquoise	-0.920376	0.00925758	0.993598	6.13412e-05	-0.656773	0.156491	0.597597	0.210312	0.651939	0.160636	-0.638648	0.172271	-0.292219	0.574148	-0.185067	0.725569
ENSDARG00000062479	ENSDARG00000062479	vcam1b	turquoise	-0.852623	0.0309796	0.956885	0.00274825	-0.582115	0.225455	0.746408	0.0883095	0.63741	0.173372	-0.789315	0.0619061	-0.394674	0.438728	0.106436	0.840949
ENSDARG00000062489	ENSDARG00000062489	2017-03-08	turquoise	-0.954252	0.00309146	0.993464	6.39312e-05	-0.749812	0.0860609	0.743138	0.0904934	0.706215	0.116786	-0.674639	0.141569	-0.374665	0.464299	-0.0645516	0.903307
ENSDARG00000062501	ENSDARG00000062501	hhipl1	turquoise	-0.896768	0.0154352	0.913931	0.0107931	-0.740033	0.0925895	0.746483	0.0882592	0.860863	0.0276919	-0.773772	0.0709798	-0.439891	0.382723	0.0472864	0.929123
ENSDARG00000062552	ENSDARG00000062552	lpar6a	turquoise	-0.992755	7.85545e-05	0.962009	0.00213752	-0.849885	0.0321104	0.716538	0.109138	0.761682	0.0784256	-0.616345	0.192552	-0.281364	0.589091	-0.126133	0.811804
ENSDARG00000062565	ENSDARG00000062565	kcnh4a	turquoise	-0.974242	0.00098668	0.98258	0.000452535	-0.803896	0.0539143	0.69654	0.12416	0.730633	0.0990658	-0.597293	0.210605	-0.349627	0.496929	-0.169849	0.747676
ENSDARG00000062577	ENSDARG00000062577	arhgap35a	turquoise	-0.907897	0.0123337	0.825521	0.0430084	-0.88678	0.0185025	0.77606	0.0696082	0.910158	0.0117447	-0.643173	0.168272	-0.429057	0.395907	0.0161847	0.975725
ENSDARG00000062752	ENSDARG00000062752	mfap3l	turquoise	-0.856715	0.029325	0.844872	0.0342307	-0.74879	0.086733	0.617978	0.191035	0.953139	0.00324247	-0.7008	0.120889	-0.445281	0.376223	-0.0859251	0.87143
ENSDARG00000062788	ENSDARG00000062788	irg1l	turquoise	-0.68669	0.131867	0.828624	0.041538	-0.373478	0.46583	0.35623	0.488257	0.197771	0.707211	-0.323512	0.531662	-0.151861	0.77396	-0.322109	0.533546
ENSDARG00000062799	ENSDARG00000062799	baiap2a	turquoise	-0.957996	0.00260944	0.984511	0.00035799	-0.727893	0.100989	0.732629	0.0976742	0.614233	0.19452	-0.679166	0.137889	-0.214691	0.682911	-0.0187515	0.971876
ENSDARG00000062801	ENSDARG00000062801	erfl3	turquoise	-0.88035	0.0206178	0.923776	0.00849367	-0.672896	0.142996	0.82354	0.04396	0.420823	0.406028	-0.593999	0.213793	-0.271873	0.602238	0.102128	0.84734
ENSDARG00000062817	ENSDARG00000062817	crym	turquoise	-0.957989	0.00261034	0.942125	0.00492742	-0.83062	0.0406048	0.741412	0.0916558	0.854145	0.0303593	-0.680348	0.136935	-0.408444	0.421403	-0.0677723	0.898497
ENSDARG00000062831	ENSDARG00000062831	si:ch73-22o12.1	turquoise	-0.814308	0.0485206	0.919675	0.00941909	-0.502891	0.309254	0.501779	0.310501	0.361523	0.481341	-0.505767	0.306037	-0.133962	0.800259	-0.192804	0.714377
ENSDARG00000062909	ENSDARG00000062909	furina	turquoise	-0.889525	0.0176329	0.899932	0.0145194	-0.702633	0.119493	0.452427	0.367664	0.863942	0.0265084	-0.623296	0.18613	-0.271078	0.603343	-0.297725	0.566607
ENSDARG00000062998	ENSDARG00000062998	pglyrp2	turquoise	-0.927945	0.00760086	0.91088	0.0115596	-0.792514	0.0601097	0.738115	0.0938951	0.88729	0.0183393	-0.759197	0.0799974	-0.374778	0.464153	0.0225458	0.966187
ENSDARG00000063031	ENSDARG00000063031	rad54l2	turquoise	-0.658043	0.155408	0.708197	0.1153	-0.530259	0.279159	0.864767	0.0261953	0.148759	0.778507	-0.421648	0.405009	-0.349524	0.497064	0.285243	0.58374
ENSDARG00000063195	ENSDARG00000063195	pxk	turquoise	-0.925549	0.00810817	0.995493	3.0425e-05	-0.694849	0.125468	0.637224	0.173538	0.673883	0.142187	-0.603033	0.205096	-0.390609	0.443885	-0.201962	0.701175
ENSDARG00000063244	ENSDARG00000063244	lix1l	turquoise	-0.876738	0.0218538	0.898363	0.0149702	-0.682547	0.135169	0.902524	0.0137894	0.51088	0.300349	-0.741232	0.0917778	-0.254869	0.625974	0.290672	0.576272
ENSDARG00000063292	ENSDARG00000063292	ssuh2rs1	turquoise	-0.771744	0.072205	0.929767	0.00722581	-0.436371	0.386991	0.374935	0.46395	0.540862	0.267816	-0.554619	0.253373	-0.309094	0.551124	-0.32797	0.525684
ENSDARG00000063332	ENSDARG00000063332	shank3a	turquoise	-0.819926	0.0457205	0.861828	0.0273184	-0.673916	0.14216	0.596999	0.210889	0.911848	0.0113136	-0.694053	0.126087	-0.534281	0.274836	-0.112176	0.832442
ENSDARG00000063371	ENSDARG00000063371	rasa3	turquoise	-0.964478	0.00187026	0.983431	0.00040952	-0.765927	0.0757728	0.780295	0.0671028	0.635662	0.174932	-0.659918	0.153817	-0.292118	0.574286	-0.0104114	0.984384
ENSDARG00000063518	ENSDARG00000063518	zgc:153913	turquoise	-0.885266	0.0189906	0.848308	0.0327706	-0.763657	0.0771864	0.718458	0.107741	0.915302	0.0104568	-0.808204	0.0516507	-0.313299	0.545427	0.106295	0.841157
ENSDARG00000063539	ENSDARG00000063539	slc25a15a	turquoise	-0.729092	0.100145	0.86079	0.0277204	-0.436415	0.386936	0.519363	0.291002	0.203369	0.699153	-0.38727	0.448136	-0.216359	0.680525	-0.174829	0.740428
ENSDARG00000063635	ENSDARG00000063635	nrxn1b	turquoise	-0.837872	0.0372976	0.903885	0.0134132	-0.602478	0.205627	0.675046	0.141236	0.314863	0.543313	-0.460427	0.358163	-0.210463	0.688966	-0.0730772	0.890579
ENSDARG00000063661	ENSDARG00000063661	nuak2	turquoise	-0.939147	0.00544196	0.993113	7.098e-05	-0.696481	0.124205	0.680743	0.136618	0.59986	0.208135	-0.627386	0.182394	-0.275814	0.59677	-0.111571	0.833338
ENSDARG00000063719	ENSDARG00000063719	usp8	turquoise	-0.946974	0.00414307	0.940309	0.00523823	-0.743444	0.0902878	0.726888	0.101699	0.801278	0.0553117	-0.823646	0.0439088	-0.200145	0.703791	0.0842949	0.873857
ENSDARG00000063905	ENSDARG00000063905	mt-co1	turquoise	-0.907025	0.0125647	0.941027	0.00511422	-0.686438	0.132067	0.495654	0.317403	0.81699	0.0471745	-0.652234	0.160382	-0.27594	0.596595	-0.260519	0.618063
ENSDARG00000063922	ENSDARG00000063922	mt-nd6	turquoise	-0.79746	0.0573795	0.923159	0.00863006	-0.497837	0.314937	0.367951	0.472981	0.507933	0.303623	-0.45768	0.361415	-0.273788	0.599579	-0.403455	0.427654
ENSDARG00000067672	ENSDARG00000067672	card9	turquoise	-0.81008	0.0506794	0.933734	0.00644134	-0.525121	0.28472	0.379186	0.458482	0.590708	0.216998	-0.484797	0.329774	-0.341964	0.507048	-0.413999	0.41448
ENSDARG00000067751	ENSDARG00000067751	si:rp71-68n21.9	turquoise	-0.751902	0.0846932	0.912399	0.0111748	-0.387533	0.447801	0.408678	0.421111	0.389913	0.44477	-0.556722	0.251192	-0.182996	0.72857	-0.221295	0.673476
ENSDARG00000067795	ENSDARG00000067795	crfb6	turquoise	-0.820952	0.0452173	0.955886	0.00287611	-0.525792	0.283991	0.477815	0.337822	0.686666	0.131886	-0.641919	0.169376	-0.412799	0.415972	-0.253378	0.628067
ENSDARG00000067851	ENSDARG00000067851	lcn15	turquoise	-0.881302	0.0202977	0.97481	0.000943791	-0.590361	0.217337	0.550851	0.257298	0.533702	0.275456	-0.581701	0.225865	-0.236866	0.651346	-0.208167	0.69226
ENSDARG00000067889	ENSDARG00000067889	gltpd2	turquoise	-0.87289	0.0232084	0.95486	0.00301049	-0.622247	0.187094	0.772289	0.0718749	0.458656	0.360259	-0.634293	0.176158	-0.313406	0.545283	0.0544371	0.918425
ENSDARG00000067912	ENSDARG00000067912	si:ch73-373m9.1	turquoise	-0.891147	0.0171285	0.830474	0.0406724	-0.729862	0.0996052	0.782956	0.0655499	0.770756	0.0728054	-0.88997	0.017494	-0.0605497	0.909287	0.313156	0.545621
ENSDARG00000067984	ENSDARG00000067984	gas1b	turquoise	-0.863404	0.0267133	0.898366	0.0149694	-0.636736	0.173973	0.460339	0.358267	0.862776	0.0269538	-0.718792	0.107498	-0.249751	0.633163	-0.199843	0.704225
ENSDARG00000068006	ENSDARG00000068006	gck	turquoise	-0.823827	0.0438214	0.909917	0.0118068	-0.565372	0.242301	0.33249	0.519643	0.631493	0.178675	-0.459155	0.359668	-0.267383	0.608483	-0.462906	0.355237
ENSDARG00000068161	ENSDARG00000068161	si:dkey-16p6.4	turquoise	-0.974091	0.000998208	0.916415	0.0101877	-0.882885	0.0197706	0.775555	0.0699099	0.852793	0.0309097	-0.66994	0.145431	-0.344771	0.503335	-0.0235772	0.964641
ENSDARG00000068187	ENSDARG00000068187	spg7	turquoise	-0.935131	0.00617556	0.977675	0.000742076	-0.744828	0.0893616	0.754971	0.0827031	0.760372	0.0792525	-0.704596	0.118006	-0.44057	0.381903	-0.0351053	0.947364
ENSDARG00000068233	ENSDARG00000068233	CD53	turquoise	-0.815933	0.0477028	0.936405	0.00593786	-0.528034	0.281562	0.402008	0.429473	0.531779	0.277522	-0.464697	0.353128	-0.307404	0.553418	-0.394362	0.439123
ENSDARG00000068261	ENSDARG00000068261	pros1	turquoise	-0.971019	0.00124767	0.962976	0.00203075	-0.825318	0.0431055	0.831702	0.0401028	0.671011	0.144547	-0.63287	0.177435	-0.35218	0.493571	0.00780914	0.988287
ENSDARG00000068262	ENSDARG00000068262	vamp5	turquoise	-0.961378	0.00220869	0.958187	0.00258598	-0.777009	0.0690436	0.751765	0.084783	0.80492	0.0533726	-0.775579	0.0698957	-0.28395	0.585523	0.0363936	0.945434
ENSDARG00000068367	ENSDARG00000068367	nfkbie	turquoise	-0.840649	0.0360661	0.961336	0.0022135	-0.578206	0.229345	0.485905	0.328504	0.671418	0.144212	-0.55425	0.253755	-0.452814	0.367201	-0.330022	0.52294
ENSDARG00000068374	ENSDARG00000068374	si:ch211-132b12.7	turquoise	-0.753329	0.0837652	0.796678	0.057807	-0.575094	0.232461	0.925714	0.00807269	0.373752	0.465477	-0.700144	0.121389	-0.29792	0.566341	0.420547	0.406368
ENSDARG00000068557	ENSDARG00000068557	htr5ab	turquoise	-0.954975	0.0029952	0.941556	0.00502376	-0.814037	0.0486579	0.869486	0.0244393	0.604439	0.203756	-0.625953	0.1837	-0.320125	0.536216	0.077584	0.883858
ENSDARG00000068628	ENSDARG00000068628	rab8b	turquoise	-0.901795	0.0139927	0.986118	0.000287715	-0.652397	0.160242	0.562956	0.244772	0.648268	0.163816	-0.567829	0.239799	-0.366868	0.474387	-0.271349	0.602966
ENSDARG00000068629	ENSDARG00000068629	cd151l	turquoise	-0.866105	0.0256918	0.962906	0.00203838	-0.57667	0.23088	0.721102	0.10583	0.468381	0.348805	-0.682041	0.135575	-0.255564	0.624999	0.0506096	0.92415
ENSDARG00000068637	ENSDARG00000068637	si:ch211-281l24.3	turquoise	-0.916725	0.0101134	0.929012	0.00738015	-0.720731	0.106096	0.46515	0.352596	0.677527	0.139216	-0.477593	0.338079	-0.209176	0.690812	-0.379307	0.458326
ENSDARG00000068681	ENSDARG00000068681	crfb1	turquoise	-0.933023	0.00657871	0.951155	0.00352049	-0.727817	0.101044	0.838181	0.0371596	0.545807	0.262589	-0.690178	0.129114	-0.23489	0.654144	0.12975	0.806467
ENSDARG00000068698	ENSDARG00000068698	psenen	turquoise	-0.849163	0.0324119	0.931416	0.00689426	-0.630432	0.179633	0.53425	0.274869	0.834878	0.0386469	-0.669581	0.145728	-0.476592	0.339239	-0.219531	0.675993
ENSDARG00000068711	ENSDARG00000068711	crfb4	turquoise	-0.92179	0.00893605	0.89299	0.016564	-0.817931	0.046706	0.677926	0.138893	0.922954	0.00867552	-0.679227	0.13784	-0.414787	0.413502	-0.0952267	0.857592
ENSDARG00000068760	ENSDARG00000068760	tnks1bp1	turquoise	-0.898946	0.014802	0.987049	0.00025051	-0.629519	0.180459	0.551912	0.25619	0.662815	0.151373	-0.619553	0.189577	-0.325835	0.528544	-0.236459	0.651923
ENSDARG00000068784	ENSDARG00000068784	VSIR	turquoise	-0.826674	0.0424596	0.949971	0.00369173	-0.578983	0.228569	0.472258	0.344276	0.652543	0.160116	-0.49818	0.31455	-0.492768	0.320675	-0.375768	0.462877
ENSDARG00000068851	ENSDARG00000068851	rnf183	turquoise	-0.859414	0.0282574	0.971364	0.00121827	-0.540688	0.268001	0.616503	0.192405	0.492279	0.321231	-0.669207	0.146038	-0.222882	0.671213	-0.0569915	0.914605
ENSDARG00000068868	ENSDARG00000068868	nap1l4b	turquoise	-0.808436	0.0515305	0.953364	0.00321166	-0.495312	0.317791	0.531787	0.277513	0.674487	0.141693	-0.721796	0.10533	-0.402567	0.428769	-0.130383	0.805533
ENSDARG00000068894	ENSDARG00000068894	nrip1b	turquoise	-0.798222	0.0569639	0.912023	0.0112695	-0.477557	0.338121	0.647848	0.164181	0.318777	0.538031	-0.623756	0.185709	-0.146231	0.782217	0.051539	0.92276
ENSDARG00000068910	ENSDARG00000068910	nos1	turquoise	-0.8376	0.0374189	0.899233	0.0147195	-0.650887	0.161545	0.865357	0.0259727	0.427728	0.397534	-0.592727	0.215029	-0.400954	0.430799	0.149562	0.777329
ENSDARG00000068912	ENSDARG00000068912	zgc:153012	turquoise	-0.923519	0.00855031	0.988886	0.00018458	-0.678828	0.138162	0.75271	0.0841676	0.590994	0.216719	-0.683699	0.134247	-0.321143	0.534846	0.00152244	0.997716
ENSDARG00000068939	ENSDARG00000068939	xaf1	turquoise	-0.936068	0.0060003	0.977229	0.000771885	-0.712037	0.112445	0.759124	0.0800438	0.546723	0.261625	-0.628787	0.181122	-0.269189	0.60597	-0.0146932	0.977962
ENSDARG00000068993	ENSDARG00000068993	zgc:153631	turquoise	-0.80792	0.0517987	0.904139	0.0133436	-0.521191	0.289002	0.509508	0.301871	0.324291	0.530615	-0.439941	0.382663	-0.153071	0.772187	-0.219602	0.675892
ENSDARG00000068996	ENSDARG00000068996	hist2h2l	turquoise	-0.99268	8.01701e-05	0.942655	0.00483846	-0.834812	0.0386769	0.750776	0.0854292	0.68602	0.132399	-0.659748	0.153961	-0.13453	0.799422	-0.00657625	0.990136
ENSDARG00000069026	ENSDARG00000069026	adcy1a	turquoise	-0.831112	0.0403761	0.898261	0.0149998	-0.598933	0.209025	0.700695	0.120969	0.303741	0.558399	-0.470123	0.346768	-0.222311	0.672027	-0.0352212	0.94719
ENSDARG00000069044	ENSDARG00000069044	agpat4	turquoise	-0.94595	0.0043032	0.974317	0.000980928	-0.776553	0.0693147	0.679793	0.137383	0.797252	0.0574932	-0.627621	0.182181	-0.444638	0.376996	-0.174914	0.740305
ENSDARG00000069135	ENSDARG00000069135	ppp1r15a	turquoise	-0.96408	0.00191215	0.987651	0.000227811	-0.770745	0.0728124	0.737208	0.0945154	0.641347	0.169881	-0.605694	0.202563	-0.322276	0.533322	-0.101094	0.848875
ENSDARG00000069244	ENSDARG00000069244	si:ch211-244b2.3	turquoise	-0.925092	0.00820662	0.979214	0.00064362	-0.739441	0.0929918	0.657534	0.155842	0.754952	0.0827153	-0.593983	0.213809	-0.482535	0.332374	-0.213206	0.685037
ENSDARG00000069290	ENSDARG00000069290	bida	turquoise	-0.964687	0.00184845	0.957422	0.00268078	-0.765846	0.0758228	0.785153	0.0642803	0.73498	0.0960462	-0.790749	0.0610981	-0.208555	0.691703	0.10599	0.841611
ENSDARG00000069302	ENSDARG00000069302	snx9b	turquoise	-0.861655	0.027385	0.963335	0.00199189	-0.544034	0.264458	0.675264	0.141058	0.587013	0.220618	-0.808451	0.0515225	-0.221581	0.673069	0.0893457	0.866338
ENSDARG00000069314	ENSDARG00000069314	tmem199	turquoise	-0.900386	0.0143902	0.982137	0.000475766	-0.603127	0.205007	0.594077	0.213718	0.572706	0.234862	-0.667767	0.147232	-0.195313	0.710755	-0.115642	0.827311
ENSDARG00000069333	ENSDARG00000069333	FP102052.1	turquoise	0.520966	0.289248	-0.494324	0.318909	0.494673	0.318514	-0.0471467	0.929332	-0.184177	0.726859	-0.242543	0.643319	0.123709	0.815383	0.750603	0.0855425
ENSDARG00000069421	ENSDARG00000069421	grpel2	turquoise	-0.920923	0.00913248	0.969183	0.00140985	-0.733345	0.0971768	0.799186	0.0564402	0.716494	0.10917	-0.705058	0.117658	-0.46016	0.358479	0.0232569	0.965121
ENSDARG00000069433	ENSDARG00000069433	tnk1	turquoise	-0.954036	0.00312046	0.991822	0.00010005	-0.715581	0.109838	0.718637	0.107611	0.685448	0.132853	-0.730343	0.0992685	-0.257631	0.622104	-0.017466	0.973804
ENSDARG00000069439	ENSDARG00000069439	ptgdsa	turquoise	-0.911615	0.0113725	0.938464	0.00556351	-0.754075	0.0832823	0.805303	0.05317	0.789642	0.0617215	-0.736725	0.094846	-0.474321	0.341875	0.0592034	0.911299
ENSDARG00000069461	ENSDARG00000069461	rnaseka	turquoise	-0.862954	0.0268856	0.966584	0.00165632	-0.573102	0.234464	0.712471	0.112124	0.636458	0.174221	-0.801153	0.0553792	-0.334119	0.517471	0.0847228	0.87322
ENSDARG00000069463	ENSDARG00000069463	alox12	turquoise	-0.781297	0.0665159	0.918138	0.00977769	-0.474218	0.341994	0.453773	0.366059	0.372105	0.467603	-0.439964	0.382636	-0.264092	0.613072	-0.297781	0.566531
ENSDARG00000069476	ENSDARG00000069476	spint2	turquoise	-0.789028	0.0620684	0.932072	0.00676458	-0.458017	0.361016	0.450439	0.370037	0.414329	0.414071	-0.515384	0.295372	-0.237247	0.650806	-0.258751	0.620536
ENSDARG00000069503	ENSDARG00000069503	cldnh	turquoise	-0.688947	0.130083	0.847639	0.0330523	-0.36251	0.480055	0.419717	0.407394	0.196916	0.708444	-0.380405	0.456916	-0.197462	0.707657	-0.240792	0.645793
ENSDARG00000069563	ENSDARG00000069563	zgc:153151	turquoise	-0.876324	0.0219976	0.911027	0.0115222	-0.712771	0.111902	0.890876	0.0172123	0.652585	0.16008	-0.739942	0.0926513	-0.444788	0.376816	0.207408	0.693349
ENSDARG00000069608	ENSDARG00000069608	palm2	turquoise	-0.740257	0.0924379	0.900114	0.0144675	-0.406872	0.42337	0.394476	0.438979	0.351731	0.49416	-0.444861	0.376728	-0.251488	0.630721	-0.31228	0.546807
ENSDARG00000069808	ENSDARG00000069808	ostm1	turquoise	-0.831833	0.0400423	0.919163	0.00953791	-0.601376	0.206681	0.455318	0.36422	0.82376	0.0438538	-0.633212	0.177128	-0.439551	0.383135	-0.29578	0.569268
ENSDARG00000069843	ENSDARG00000069843	kctd12.1	turquoise	-0.494146	0.319111	0.760736	0.0790224	-0.0596207	0.910675	0.211264	0.687818	0.308608	0.551784	-0.590668	0.217037	-0.258494	0.620895	-0.162122	0.758947
ENSDARG00000069934	ENSDARG00000069934	parp4	turquoise	-0.948587	0.00389694	0.985564	0.000311073	-0.7409	0.0920022	0.754594	0.0829465	0.740883	0.0920134	-0.730782	0.0989613	-0.365329	0.476386	-0.00859628	0.987106
ENSDARG00000069940	ENSDARG00000069940	ppap2d	turquoise	-0.869827	0.0243147	0.958445	0.00255431	-0.593051	0.214715	0.771532	0.0723335	0.509821	0.301524	-0.735488	0.0956962	-0.28004	0.590921	0.126461	0.81132
ENSDARG00000069941	ENSDARG00000069941	tdp2a	turquoise	-0.903245	0.0135894	0.925603	0.00809649	-0.721979	0.105199	0.830407	0.040704	0.449545	0.371107	-0.566596	0.241053	-0.277958	0.5938	0.0687895	0.896979
ENSDARG00000069944	ENSDARG00000069944	p2ry13	turquoise	-0.810367	0.0505316	0.930102	0.00715775	-0.521576	0.288581	0.393436	0.440297	0.510054	0.301266	-0.449506	0.371154	-0.290639	0.576317	-0.399974	0.432032
ENSDARG00000069978	ENSDARG00000069978	si:ch211-67e16.2	turquoise	-0.877161	0.0217073	0.986307	0.000279957	-0.600836	0.207198	0.612024	0.196588	0.685173	0.133072	-0.692876	0.127003	-0.403937	0.427048	-0.132976	0.801712
ENSDARG00000070000	ENSDARG00000070000	txnipb	turquoise	-0.851386	0.0314881	0.918905	0.00959789	-0.626387	0.183304	0.681111	0.136321	0.35418	0.490945	-0.452473	0.367608	-0.267556	0.608242	-0.107669	0.83912
ENSDARG00000070047	ENSDARG00000070047	rgs4	turquoise	-0.621924	0.187391	0.662426	0.1517	-0.350427	0.495876	0.586432	0.22119	-0.00953291	0.985701	-0.493744	0.319568	0.228494	0.663224	0.267163	0.60879
ENSDARG00000070078	ENSDARG00000070078	abcb11b	turquoise	-0.928309	0.00752507	0.939621	0.00535842	-0.661634	0.152367	0.612101	0.196516	0.601227	0.206824	-0.720841	0.106017	-0.00232873	0.996507	-0.0147435	0.977886
ENSDARG00000070122	ENSDARG00000070122	stk11ip	turquoise	-0.898364	0.0149698	0.98359	0.000401725	-0.620064	0.189105	0.632489	0.177778	0.71602	0.109517	-0.760742	0.0790187	-0.316663	0.540882	-0.0601178	0.909932
ENSDARG00000070161	ENSDARG00000070161	vamp3	turquoise	-0.833744	0.0391636	0.957595	0.00265911	-0.520999	0.289211	0.538502	0.270325	0.699732	0.121705	-0.757704	0.0809485	-0.332663	0.519413	-0.103086	0.845919
ENSDARG00000070174	ENSDARG00000070174	PLEKHH3	turquoise	-0.910106	0.0117582	0.993777	5.7974e-05	-0.642053	0.169257	0.624206	0.185296	0.696773	0.12398	-0.701373	0.120451	-0.338319	0.511883	-0.125242	0.81312
ENSDARG00000070214	ENSDARG00000070214	slc41a1	turquoise	-0.921033	0.0091074	0.965819	0.00173254	-0.657007	0.156291	0.592632	0.215122	0.546515	0.261844	-0.60129	0.206763	-0.13283	0.801926	-0.150568	0.775855
ENSDARG00000070266	ENSDARG00000070266	spock3	turquoise	-0.775364	0.0700246	0.895966	0.0156717	-0.477529	0.338153	0.298985	0.564886	0.513725	0.297202	-0.430549	0.394082	-0.236625	0.651687	-0.455302	0.364239
ENSDARG00000070317	ENSDARG00000070317	irge4	turquoise	-0.932215	0.00673657	0.96824	0.00149702	-0.744606	0.08951	0.690312	0.129009	0.554346	0.253656	-0.491892	0.32167	-0.343278	0.505309	-0.191388	0.716423
ENSDARG00000070318	ENSDARG00000070318	arl8bb	turquoise	-0.8608	0.0277164	0.836314	0.0379969	-0.720887	0.105984	0.813486	0.0489372	0.824245	0.0436204	-0.869422	0.0244628	-0.289037	0.578519	0.282913	0.586953
ENSDARG00000070399	ENSDARG00000070399	alg2	turquoise	-0.850485	0.0318609	0.864788	0.0261875	-0.728817	0.100339	0.897881	0.0151101	0.71183	0.112598	-0.745286	0.0890562	-0.486044	0.328345	0.239039	0.648271
ENSDARG00000070447	ENSDARG00000070447	slc39a9	turquoise	-0.834166	0.0389712	0.96936	0.00139385	-0.536752	0.272192	0.634916	0.175599	0.484722	0.329861	-0.607346	0.200996	-0.375824	0.462805	-0.101324	0.848534
ENSDARG00000070453	ENSDARG00000070453	gch1	turquoise	0.968946	0.00143156	-0.9016	0.0140476	0.825702	0.0429219	-0.730839	0.0989214	-0.822403	0.0445101	0.768452	0.0742148	0.129866	0.806297	-0.0681969	0.897863
ENSDARG00000070558	ENSDARG00000070558	si:ch211-93g23.2	turquoise	-0.942197	0.00491516	0.856605	0.0293691	-0.826854	0.0423741	0.886603	0.0185592	0.660236	0.153548	-0.759213	0.0799875	-0.0935765	0.860045	0.285084	0.583959
ENSDARG00000070567	ENSDARG00000070567	cadpsb	turquoise	-0.279612	0.591512	0.551	0.257142	0.0397271	0.940441	0.429367	0.395528	-0.0981696	0.853219	-0.363493	0.478775	-0.422516	0.403939	0.146617	0.781651
ENSDARG00000070606	ENSDARG00000070606	ikbke	turquoise	-0.86153	0.0274333	0.841645	0.0356291	-0.717297	0.108584	0.927466	0.00770096	0.420734	0.406137	-0.64761	0.164388	-0.188578	0.720486	0.314629	0.543629
ENSDARG00000070651	ENSDARG00000070651	prkcdb	turquoise	-0.812294	0.0495436	0.924348	0.00836842	-0.51987	0.290447	0.412877	0.415875	0.4523	0.367814	-0.441435	0.380858	-0.23225	0.657889	-0.363006	0.479408
ENSDARG00000070669	ENSDARG00000070669	cxcr3.3	turquoise	-0.904514	0.013241	0.995059	3.65669e-05	-0.628382	0.18149	0.631305	0.178844	0.600855	0.20718	-0.645989	0.165802	-0.312934	0.545921	-0.135313	0.798269
ENSDARG00000070702	ENSDARG00000070702	s100v2	turquoise	-0.372978	0.466476	0.562781	0.244951	0.0195436	0.970688	0.0400898	0.939898	-0.121206	0.819081	-0.252488	0.629317	0.17567	0.739206	-0.23395	0.655477
ENSDARG00000070794	ENSDARG00000070794	greb1	turquoise	-0.636161	0.174486	0.789752	0.0616592	-0.314403	0.543935	0.0937189	0.859833	0.434729	0.388986	-0.342148	0.506805	-0.184989	0.725682	-0.5573	0.250594
ENSDARG00000070833	ENSDARG00000070833	lin52	turquoise	-0.934291	0.00633466	0.993769	5.81218e-05	-0.708499	0.115074	0.633862	0.176544	0.723101	0.104394	-0.635863	0.174752	-0.378379	0.459518	-0.190524	0.717673
ENSDARG00000070834	ENSDARG00000070834	taf13	turquoise	-0.867852	0.0250407	0.975788	0.000872269	-0.553599	0.254433	0.646256	0.165569	0.518854	0.29156	-0.702406	0.119666	-0.235751	0.652925	-0.018368	0.972451
ENSDARG00000070847	ENSDARG00000070847	trim35-20	turquoise	-0.964964	0.00181978	0.951021	0.00353962	-0.808155	0.0516765	0.614733	0.194053	0.670372	0.145074	-0.492217	0.321301	-0.255169	0.625554	-0.272679	0.601119
ENSDARG00000070873	ENSDARG00000070873	ccl25b	turquoise	-0.878655	0.0211937	0.926936	0.0078125	-0.686898	0.131702	0.881314	0.0202937	0.581397	0.226167	-0.723298	0.104253	-0.398402	0.434016	0.197804	0.707164
ENSDARG00000070892	ENSDARG00000070892	si:ch211-262h13.5	turquoise	-0.935282	0.00614704	0.897193	0.0153106	-0.833347	0.0393455	0.860734	0.027742	0.810562	0.0504312	-0.743919	0.0899696	-0.380757	0.456464	0.143815	0.785765
ENSDARG00000070903	ENSDARG00000070903	met	turquoise	-0.90298	0.0136628	0.870898	0.0239249	-0.706278	0.116739	0.83389	0.0390971	0.651479	0.161034	-0.869387	0.0244754	-0.0580065	0.913088	0.338504	0.511638
ENSDARG00000070914	ENSDARG00000070914	dusp6	turquoise	-0.952236	0.00336767	0.911342	0.0114418	-0.868854	0.0246711	0.824884	0.0433132	0.829336	0.0412037	-0.665842	0.148836	-0.431384	0.393062	0.0208895	0.96867
ENSDARG00000070918	ENSDARG00000070918	si:ch211-284e20.8	turquoise	-0.932698	0.006642	0.824271	0.0436077	-0.893748	0.0163343	0.597559	0.210349	0.91213	0.0112424	-0.559086	0.248749	-0.246031	0.6384	-0.19078	0.717301
ENSDARG00000070930	ENSDARG00000070930	cart1	turquoise	-0.955921	0.00287156	0.992503	8.41014e-05	-0.717634	0.108339	0.713619	0.111278	0.668229	0.146848	-0.711988	0.112481	-0.247537	0.636279	-0.0321477	0.951795
ENSDARG00000070958	ENSDARG00000070958	pex6	turquoise	-0.862273	0.027147	0.897051	0.0153522	-0.686294	0.132181	0.385638	0.450219	0.768958	0.0739041	-0.446094	0.375245	-0.356021	0.488531	-0.477736	0.337913
ENSDARG00000070960	ENSDARG00000070960	si:ch211-288g17.4	turquoise	-0.911515	0.0113981	0.959962	0.00237252	-0.668827	0.146353	0.800474	0.0557441	0.655899	0.157236	-0.814095	0.0486285	-0.275308	0.597472	0.16473	0.75514
ENSDARG00000070961	ENSDARG00000070961	lepr	turquoise	-0.827878	0.0418894	0.878321	0.0213078	-0.584895	0.222704	0.858822	0.0284897	0.424567	0.401415	-0.764625	0.076582	-0.179495	0.733649	0.334633	0.516786
ENSDARG00000070971	ENSDARG00000070971	furinb	turquoise	-0.961753	0.00216623	0.917526	0.00992233	-0.805204	0.0532222	0.796371	0.0579756	0.793669	0.0594666	-0.803635	0.0540531	-0.190086	0.718305	0.143954	0.785561
ENSDARG00000071012	ENSDARG00000071012	ifit14	turquoise	-0.94372	0.004662	0.921948	0.00890035	-0.808313	0.0515943	0.687742	0.131034	0.895179	0.0159054	-0.713916	0.111059	-0.35615	0.488362	-0.0711559	0.893446
ENSDARG00000071013	ENSDARG00000071013	arl6ip6	turquoise	-0.882385	0.0199363	0.934788	0.00624029	-0.658008	0.155438	0.421767	0.404863	0.72072	0.106105	-0.514962	0.295837	-0.291142	0.575627	-0.402388	0.428995
ENSDARG00000071065	ENSDARG00000071065	g6pd	turquoise	-0.964207	0.00189879	0.993714	5.91532e-05	-0.752505	0.0843004	0.696959	0.123836	0.724656	0.103284	-0.675834	0.140593	-0.313874	0.544649	-0.103602	0.845153
ENSDARG00000071150	ENSDARG00000071150	cica	turquoise	-0.875429	0.0223102	0.877155	0.0217093	-0.694368	0.125842	0.524061	0.285873	0.916003	0.0102869	-0.741273	0.0917499	-0.271434	0.602848	-0.130771	0.804962
ENSDARG00000071212	ENSDARG00000071212	p3h1	turquoise	0.915414	0.0104295	-0.91666	0.010129	0.820622	0.0453787	-0.67461	0.141592	-0.854257	0.0303135	0.550473	0.257693	0.54784	0.260451	0.219658	0.675813
ENSDARG00000071216	ENSDARG00000071216	si:ch211-133n4.9	turquoise	-0.897031	0.0153581	0.916124	0.0102577	-0.713906	0.111066	0.457607	0.361502	0.835603	0.038318	-0.571696	0.235881	-0.315782	0.542071	-0.348626	0.498247
ENSDARG00000071357	ENSDARG00000071357	map4k3b	turquoise	-0.737916	0.0940311	0.890193	0.0174243	-0.354073	0.491085	0.569577	0.238025	0.364184	0.477875	-0.755783	0.0821804	-0.101005	0.849008	0.121105	0.819231
ENSDARG00000071403	ENSDARG00000071403	oaz1a	turquoise	-0.834874	0.0386488	0.89792	0.0150985	-0.646487	0.165367	0.887563	0.0182525	0.496229	0.316754	-0.671357	0.144262	-0.426041	0.399605	0.214068	0.683803
ENSDARG00000071437	ENSDARG00000071437	ptprc	turquoise	-0.788083	0.062605	0.918901	0.00959891	-0.496907	0.315987	0.348353	0.498606	0.545794	0.262603	-0.449307	0.371392	-0.325245	0.529335	-0.438227	0.384739
ENSDARG00000071456	ENSDARG00000071456	crp7	turquoise	-0.876676	0.0218753	0.875727	0.022206	-0.706883	0.116285	0.681635	0.1359	0.895797	0.0157217	-0.834107	0.0389979	-0.312815	0.546083	0.0830801	0.875667
ENSDARG00000071558	ENSDARG00000071558	fblim1	turquoise	-0.906237	0.0127751	0.968171	0.00150349	-0.715388	0.109978	0.586088	0.221528	0.647406	0.164566	-0.466346	0.351192	-0.446884	0.374297	-0.333412	0.518413
ENSDARG00000071576	ENSDARG00000071576	si:dkey-102c8.3	turquoise	-0.949528	0.00375691	0.940812	0.00515115	-0.76413	0.076891	0.845041	0.0341582	0.563938	0.243767	-0.688325	0.130574	-0.190457	0.717768	0.138031	0.794268
ENSDARG00000071585	ENSDARG00000071585	si:dkeyp-110e4.11	turquoise	-0.851061	0.0316222	0.953029	0.0032576	-0.583774	0.223812	0.574645	0.232912	0.437264	0.385907	-0.47883	0.336648	-0.302492	0.560101	-0.230278	0.660688
ENSDARG00000071701	ENSDARG00000071701	zgc:162941	turquoise	-0.750412	0.0856673	0.888484	0.0179605	-0.434456	0.389318	0.327205	0.526708	0.398295	0.43415	-0.405951	0.424523	-0.216003	0.681034	-0.404731	0.426052
ENSDARG00000071871	ENSDARG00000071871	glod5	turquoise	-0.977152	0.000777098	0.914018	0.0107715	-0.871883	0.0235695	0.739619	0.0928707	0.862085	0.0272191	-0.690424	0.128921	-0.27801	0.593728	-0.0305513	0.954187
ENSDARG00000071872	ENSDARG00000071872	zdhhc15b	turquoise	-0.921994	0.00889011	0.906588	0.012681	-0.7815	0.0663977	0.761573	0.078494	0.873355	0.0230429	-0.785023	0.0643551	-0.363696	0.478511	0.0743729	0.888646
ENSDARG00000073688	ENSDARG00000073688	nav2a	turquoise	-0.979241	0.000641914	0.968269	0.00149431	-0.805113	0.0532702	0.80244	0.0546894	0.725067	0.102991	-0.723182	0.104336	-0.271844	0.602278	0.046929	0.929658
ENSDARG00000073704	ENSDARG00000073704	si:dkeyp-72g9.4	turquoise	-0.936944	0.00583882	0.9708	0.00126647	-0.697151	0.123688	0.788818	0.0621879	0.605638	0.202616	-0.755481	0.0823743	-0.214562	0.683096	0.111859	0.832911
ENSDARG00000073709	ENSDARG00000073709	fam149a	turquoise	-0.785057	0.0643353	0.86498	0.0261148	-0.643545	0.167944	0.716504	0.109163	0.779002	0.0678633	-0.647591	0.164405	-0.674854	0.141393	-0.0222562	0.966621
ENSDARG00000073718	ENSDARG00000073718	si:ch73-233k15.2	turquoise	-0.742825	0.090704	0.841766	0.0355762	-0.507894	0.303667	0.840768	0.0360138	0.311645	0.547666	-0.640386	0.17073	-0.335973	0.515003	0.278409	0.593176
ENSDARG00000073738	ENSDARG00000073738	dennd2c	turquoise	-0.9482	0.00395538	0.996622	1.71018e-05	-0.713221	0.11157	0.710929	0.113266	0.696229	0.1244	-0.710237	0.113779	-0.313752	0.544815	-0.0528925	0.920735
ENSDARG00000073765	ENSDARG00000073765	gna13a	turquoise	-0.944823	0.00448277	0.993452	6.41659e-05	-0.713123	0.111643	0.634142	0.176293	0.725903	0.102398	-0.662347	0.151767	-0.319502	0.537054	-0.164266	0.755817
ENSDARG00000073820	ENSDARG00000073820	zgc:174917	turquoise	-0.723364	0.104206	0.848928	0.0325102	-0.428916	0.396079	0.488108	0.325984	0.188663	0.720363	-0.370316	0.469917	-0.171798	0.744838	-0.195533	0.710438
ENSDARG00000073845	ENSDARG00000073845	zgc:110843	turquoise	0.939766	0.005333	-0.801992	0.054929	0.890572	0.0173065	-0.6364	0.174273	-0.867602	0.0251334	0.6291	0.180839	0.083108	0.875625	0.0513329	0.923068
ENSDARG00000073850	ENSDARG00000073850	hdac7b	turquoise	-0.607164	0.201169	0.729159	0.100098	-0.278016	0.59372	0.29052	0.57648	0.0496017	0.925659	-0.310232	0.549582	0.0781461	0.883019	-0.222031	0.672426
ENSDARG00000073870	ENSDARG00000073870	gdpd2	turquoise	-0.835459	0.0383832	0.969429	0.00138759	-0.528925	0.280599	0.494292	0.318946	0.583165	0.224414	-0.590158	0.217535	-0.352269	0.493454	-0.260854	0.617594
ENSDARG00000073872	ENSDARG00000073872	tpst1	turquoise	-0.922426	0.00879317	0.988047	0.000213451	-0.672309	0.143478	0.694317	0.125881	0.553945	0.254073	-0.619025	0.190065	-0.284595	0.584632	-0.0868933	0.869988
ENSDARG00000073893	ENSDARG00000073893	dnase2	turquoise	-0.9349	0.0062191	0.938521	0.0055533	-0.765453	0.0760671	0.843701	0.0347348	0.753064	0.0839374	-0.789173	0.0619866	-0.34358	0.504909	0.155817	0.768165
ENSDARG00000073909	ENSDARG00000073909	ppip5k1b	turquoise	-0.883301	0.0196332	0.938733	0.00551544	-0.648953	0.163221	0.651955	0.160623	0.410656	0.418642	-0.485416	0.329065	-0.215542	0.681694	-0.138216	0.793996
ENSDARG00000074129	ENSDARG00000074129	edem3	turquoise	-0.887394	0.0183061	0.852292	0.0311153	-0.809827	0.05081	0.754129	0.0832472	0.913846	0.0108139	-0.714873	0.110356	-0.457498	0.361631	0.0377809	0.943356
ENSDARG00000074183	ENSDARG00000074183	si:dkey-172j4.3	turquoise	-0.890577	0.0173049	0.855536	0.0297973	-0.766439	0.0754557	0.898896	0.0148163	0.422431	0.404044	-0.567354	0.240282	-0.191328	0.71651	0.203656	0.69874
ENSDARG00000074221	ENSDARG00000074221	zgc:172302	turquoise	-0.870432	0.0240942	0.872111	0.0234877	-0.723104	0.104392	0.471152	0.345566	0.917747	0.00987012	-0.612652	0.196	-0.360074	0.483231	-0.289821	0.577441
ENSDARG00000074244	ENSDARG00000074244	arhgef10lb	turquoise	-0.731062	0.0987659	0.778292	0.0682827	-0.553721	0.254305	0.823445	0.0440056	0.170544	0.746664	-0.463939	0.35402	-0.226264	0.666395	0.2206	0.674467
ENSDARG00000074262	ENSDARG00000074262	nck1a	turquoise	-0.918102	0.0097862	0.972569	0.00111835	-0.685777	0.132591	0.525989	0.283777	0.677499	0.139239	-0.550006	0.258182	-0.297464	0.566965	-0.31143	0.547957
ENSDARG00000074287	ENSDARG00000074287	sptlc2b	turquoise	-0.892942	0.0165787	0.966471	0.00166744	-0.650705	0.161703	0.742161	0.0911508	0.477381	0.338325	-0.594917	0.212903	-0.311887	0.547338	-0.0236668	0.964506
ENSDARG00000074378	ENSDARG00000074378	junba	turquoise	-0.844516	0.0343833	0.893356	0.0164531	-0.638698	0.172227	0.806756	0.0524069	0.340935	0.508412	-0.539405	0.269364	-0.255206	0.625501	0.099374	0.85143
ENSDARG00000074390	ENSDARG00000074390	tmem176l.4	turquoise	-0.7659	0.0757895	0.893002	0.0165604	-0.458405	0.360556	0.399772	0.432287	0.341754	0.507326	-0.403932	0.427055	-0.194432	0.712027	-0.33366	0.518083
ENSDARG00000074487	ENSDARG00000074487	CR762483.1	turquoise	-0.66969	0.145638	0.837666	0.0373896	-0.334567	0.516875	0.300072	0.563401	0.249414	0.633637	-0.346268	0.501358	-0.200232	0.703667	-0.373766	0.465458
ENSDARG00000074506	ENSDARG00000074506	tmem94	turquoise	-0.938957	0.00547567	0.936866	0.00585298	-0.796306	0.0580112	0.70189	0.120058	0.876104	0.0220744	-0.700053	0.121459	-0.415009	0.413226	-0.0828113	0.876067
ENSDARG00000074554	ENSDARG00000074554	tspan31	turquoise	-0.82104	0.0451744	0.941939	0.00495874	-0.529721	0.279739	0.734346	0.0964839	0.427196	0.398186	-0.669962	0.145413	-0.322936	0.532435	0.0833013	0.875337
ENSDARG00000074561	ENSDARG00000074561	SLC47A1 (1 of many)	turquoise	-0.616998	0.191944	0.832517	0.0397269	-0.237162	0.650927	0.198937	0.705531	0.460256	0.358365	-0.517456	0.293094	-0.301022	0.562106	-0.369661	0.470766
ENSDARG00000074599	ENSDARG00000074599	frmd4ba	turquoise	-0.922945	0.00867741	0.97049	0.00129344	-0.650868	0.161561	0.70598	0.116963	0.547413	0.2609	-0.714012	0.110988	-0.140869	0.790094	0.0354341	0.946871
ENSDARG00000074611	ENSDARG00000074611	wdr37	turquoise	-0.860186	0.0279552	0.949656	0.00373803	-0.55044	0.257728	0.443604	0.378241	0.589858	0.217828	-0.613816	0.19491	-0.153758	0.77118	-0.253346	0.628112
ENSDARG00000074617	ENSDARG00000074617	wfs1b	turquoise	-0.871267	0.0237914	0.916088	0.0102664	-0.668976	0.146229	0.463977	0.353976	0.856071	0.0295826	-0.62579	0.183848	-0.367	0.474215	-0.302884	0.559567
ENSDARG00000074624	ENSDARG00000074624	si:ch211-198a12.6	turquoise	-0.948416	0.0039227	0.994439	4.6309e-05	-0.730215	0.0993579	0.729697	0.099721	0.715146	0.110156	-0.700859	0.120843	-0.361754	0.481039	-0.0541809	0.918808
ENSDARG00000074635	ENSDARG00000074635	abca1a	turquoise	-0.815355	0.0479933	0.754913	0.0827405	-0.702861	0.11932	0.912991	0.0110265	0.320308	0.535969	-0.591256	0.216462	-0.0481739	0.927795	0.37948	0.458103
ENSDARG00000074686	ENSDARG00000074686	mgea5	turquoise	-0.949557	0.0037526	0.958123	0.00259383	-0.787037	0.0632003	0.684933	0.133263	0.84772	0.033018	-0.685562	0.132762	-0.39662	0.436266	-0.11859	0.822949
ENSDARG00000074698	ENSDARG00000074698	sdsl	turquoise	0.863877	0.0265329	-0.922706	0.00873076	0.662303	0.151803	-0.494013	0.319262	-0.855143	0.0299554	0.631767	0.178428	0.431473	0.392954	0.282941	0.586914
ENSDARG00000074712	ENSDARG00000074712	si:ch211-186e20.2	turquoise	-0.932362	0.00670773	0.975876	0.000865957	-0.730204	0.0993659	0.586981	0.220649	0.775647	0.0698548	-0.605069	0.203157	-0.386011	0.449742	-0.257589	0.622162
ENSDARG00000074754	ENSDARG00000074754	si:dkey-188i13.9	turquoise	-0.896848	0.0154118	0.948146	0.00396349	-0.719004	0.107345	0.851436	0.0314674	0.612179	0.196443	-0.660626	0.153218	-0.466201	0.351361	0.0816674	0.877771
ENSDARG00000074765	ENSDARG00000074765	mhc1zja	turquoise	-0.931445	0.00688854	0.961001	0.00225175	-0.735106	0.0959596	0.622641	0.186731	0.84115	0.0358459	-0.698429	0.122704	-0.367966	0.472962	-0.153142	0.772083
ENSDARG00000074776	ENSDARG00000074776	tmem154	turquoise	-0.974053	0.00100115	0.973792	0.00102131	-0.821553	0.0449236	0.689497	0.12965	0.753271	0.0838027	-0.577323	0.230227	-0.370397	0.469812	-0.19458	0.711814
ENSDARG00000074844	ENSDARG00000074844	CABZ01061495.1	turquoise	-0.703418	0.118898	0.843832	0.0346785	-0.371771	0.468036	0.288105	0.5798	0.291256	0.57547	-0.373828	0.465378	-0.117301	0.824856	-0.376206	0.462313
ENSDARG00000074848	ENSDARG00000074848	smim7	turquoise	-0.912254	0.0112112	0.998195	4.8868e-06	-0.64663	0.165243	0.646805	0.16509	0.636043	0.174591	-0.659518	0.154156	-0.341046	0.508265	-0.128426	0.808419
ENSDARG00000074852	ENSDARG00000074852	myo15b	turquoise	-0.914424	0.0106715	0.859472	0.0282346	-0.819002	0.0461754	0.755393	0.0824309	0.908861	0.012081	-0.766503	0.0754163	-0.32973	0.52333	0.0863056	0.870863
ENSDARG00000074869	ENSDARG00000074869	si:ch1073-291c23.2	turquoise	-0.897127	0.01533	0.899356	0.014684	-0.657132	0.156184	0.810008	0.0507163	0.539187	0.269596	-0.819413	0.0459726	-0.0387619	0.941886	0.289329	0.578116
ENSDARG00000075016	ENSDARG00000075016	apobb.2	turquoise	-0.890117	0.017448	0.931158	0.00694572	-0.629774	0.180228	0.450686	0.369742	0.754436	0.0830486	-0.674696	0.141522	-0.154528	0.770053	-0.235814	0.652836
ENSDARG00000075034	ENSDARG00000075034	raver2	turquoise	-0.952215	0.00337057	0.968166	0.00150395	-0.769347	0.0736657	0.596692	0.211186	0.791158	0.060868	-0.602708	0.205407	-0.338185	0.512062	-0.249086	0.634098
ENSDARG00000075139	ENSDARG00000075139	hdac5	turquoise	-0.814356	0.0484966	0.8981	0.0150463	-0.545578	0.262831	0.712862	0.111835	0.2945	0.571021	-0.558711	0.249137	-0.178174	0.735567	0.0619479	0.907197
ENSDARG00000075149	ENSDARG00000075149	nagpa	turquoise	-0.846312	0.033615	0.857781	0.0289009	-0.702662	0.119471	0.809592	0.0509311	0.820973	0.045207	-0.824536	0.0434804	-0.426803	0.398669	0.213361	0.684815
ENSDARG00000075173	ENSDARG00000075173	si:ch1073-322p19.1	turquoise	-0.887632	0.0182306	0.986823	0.000259292	-0.597248	0.210648	0.615755	0.1931	0.679989	0.137225	-0.736126	0.0952573	-0.322997	0.532353	-0.0854393	0.872153
ENSDARG00000075192	ENSDARG00000075192	yme1l1a	turquoise	-0.870369	0.024117	0.948264	0.00394562	-0.658426	0.155083	0.828849	0.0414323	0.590663	0.217041	-0.69525	0.125158	-0.458993	0.359859	0.105201	0.842781
ENSDARG00000075261	ENSDARG00000075261	timp2b	turquoise	-0.734468	0.0963996	0.865009	0.026104	-0.442023	0.380147	0.452033	0.368133	0.23949	0.647634	-0.354011	0.491166	-0.214964	0.68252	-0.27483	0.598134
ENSDARG00000075282	ENSDARG00000075282	irs2b	turquoise	-0.801063	0.0554273	0.926049	0.00800093	-0.51438	0.296479	0.422128	0.404419	0.449877	0.37071	-0.420912	0.405918	-0.301094	0.562007	-0.378325	0.459587
ENSDARG00000075346	ENSDARG00000075346	tmem129	turquoise	-0.620165	0.189011	0.699818	0.121639	-0.445132	0.376401	0.77449	0.070548	0.633589	0.176789	-0.844426	0.0344222	-0.458873	0.360002	0.430751	0.393835
ENSDARG00000075389	ENSDARG00000075389	si:ch211-281g13.4	turquoise	-0.944641	0.00451214	0.977631	0.000744964	-0.762545	0.0778829	0.779014	0.0678566	0.603344	0.2048	-0.584995	0.222606	-0.382078	0.454772	-0.0664759	0.900433
ENSDARG00000075476	ENSDARG00000075476	si:ch211-213a13.7	turquoise	-0.964019	0.00191868	0.971465	0.00120972	-0.817055	0.0471418	0.685151	0.133089	0.742412	0.0909819	-0.546971	0.261364	-0.411472	0.417625	-0.221233	0.673564
ENSDARG00000075482	ENSDARG00000075482	zgc:173587	turquoise	-0.943397	0.00471515	0.984566	0.000355463	-0.708083	0.115385	0.74324	0.0904249	0.579218	0.228335	-0.663419	0.150865	-0.247171	0.636793	-0.0132413	0.980139
ENSDARG00000075560	ENSDARG00000075560	kmt2cb	turquoise	-0.956926	0.00274316	0.99178	0.000101073	-0.719776	0.106786	0.674684	0.141532	0.70581	0.117091	-0.707516	0.11581	-0.249282	0.633823	-0.079553	0.880922
ENSDARG00000075584	ENSDARG00000075584	itfg1	turquoise	-0.904101	0.0133539	0.898045	0.0150622	-0.800113	0.0559391	0.612062	0.196552	0.907286	0.0124954	-0.588449	0.219209	-0.489789	0.324065	-0.231569	0.658856
ENSDARG00000075697	ENSDARG00000075697	si:ch73-380l3.1	turquoise	-0.88751	0.0182693	0.965044	0.00181148	-0.638409	0.172484	0.479291	0.336115	0.685419	0.132876	-0.551884	0.256219	-0.329149	0.524106	-0.34186	0.507186
ENSDARG00000075707	ENSDARG00000075707	nid2a	turquoise	-0.724509	0.103389	0.864848	0.0261646	-0.410167	0.419252	0.338986	0.510997	0.305916	0.55544	-0.361172	0.481799	-0.191035	0.716933	-0.378255	0.459678
ENSDARG00000075759	ENSDARG00000075759	samd4a	turquoise	-0.86407	0.0264595	0.947781	0.00401902	-0.58798	0.219669	0.498978	0.313651	0.480807	0.334365	-0.49086	0.322845	-0.20428	0.697842	-0.284444	0.584841
ENSDARG00000075831	ENSDARG00000075831	slc7a8a	turquoise	-0.859205	0.0283393	0.953729	0.00316191	-0.589868	0.217818	0.50927	0.302137	0.48888	0.325102	-0.474007	0.34224	-0.273379	0.600147	-0.303732	0.558412
ENSDARG00000075949	ENSDARG00000075949	prkd1	turquoise	-0.947786	0.00401832	0.994366	4.75154e-05	-0.740299	0.0924094	0.742531	0.0909014	0.676522	0.140033	-0.65217	0.160438	-0.385398	0.450525	-0.0759201	0.886339
ENSDARG00000075954	ENSDARG00000075954	serpinh1a	turquoise	-0.850707	0.0317689	0.969966	0.0013395	-0.544366	0.264108	0.49358	0.319753	0.565544	0.242126	-0.585151	0.222452	-0.29015	0.576989	-0.257675	0.622042
ENSDARG00000075977	ENSDARG00000075977	prr5a	turquoise	-0.814551	0.0483981	0.883498	0.0195684	-0.621517	0.187765	0.869921	0.0242801	0.403872	0.42713	-0.60562	0.202633	-0.396461	0.436467	0.18977	0.718762
ENSDARG00000076056	ENSDARG00000076056	IYD	turquoise	-0.540963	0.267709	0.655148	0.157879	-0.380679	0.456565	0.692159	0.127563	0.631055	0.17907	-0.754011	0.0833233	-0.600967	0.207073	0.323689	0.531423
ENSDARG00000076058	ENSDARG00000076058	gba	turquoise	-0.851283	0.0315304	0.929651	0.00724943	-0.668493	0.14663	0.752478	0.0843185	0.750429	0.0856559	-0.698785	0.122431	-0.575435	0.232118	0.00375198	0.994372
ENSDARG00000076060	ENSDARG00000076060	diaph2	turquoise	-0.881085	0.0203705	0.963831	0.00193867	-0.641174	0.170033	0.777807	0.06857	0.666587	0.148214	-0.766578	0.0753695	-0.418616	0.408756	0.0902331	0.865018
ENSDARG00000076120	ENSDARG00000076120	foxp4	turquoise	-0.863835	0.0265491	0.974579	0.000961162	-0.568876	0.238736	0.524166	0.285759	0.550369	0.257801	-0.5704	0.237191	-0.292943	0.573156	-0.247076	0.636927
ENSDARG00000076128	ENSDARG00000076128	prkar1aa	turquoise	-0.92834	0.00751877	0.991615	0.000105176	-0.719245	0.10717	0.723428	0.10416	0.647765	0.164253	-0.607725	0.200638	-0.432205	0.39206	-0.119881	0.82104
ENSDARG00000076189	ENSDARG00000076189	ccdc88b	turquoise	-0.831142	0.0403621	0.93922	0.00542901	-0.549645	0.258559	0.398623	0.433736	0.573494	0.234069	-0.484172	0.330493	-0.291902	0.574583	-0.396884	0.435932
ENSDARG00000076218	ENSDARG00000076218	b3galt4	turquoise	-0.963715	0.00195101	0.97125	0.00122795	-0.81334	0.049011	0.683713	0.134236	0.780814	0.0667988	-0.585663	0.221947	-0.4135	0.4151	-0.200722	0.702961
ENSDARG00000076251	ENSDARG00000076251	irf3	turquoise	-0.712766	0.111906	0.719577	0.10693	-0.584389	0.223204	0.921312	0.00904414	0.220998	0.6739	-0.549323	0.258896	-0.216381	0.680495	0.41329	0.415362
ENSDARG00000076371	ENSDARG00000076371	CABZ01080074.2	turquoise	-0.962802	0.00204984	0.907717	0.0123813	-0.878843	0.0211293	0.788349	0.0624537	0.860544	0.0278157	-0.675084	0.141205	-0.376513	0.461919	-0.00461095	0.993084
ENSDARG00000076386	ENSDARG00000076386	epdl1	turquoise	-0.974867	0.000939598	0.910243	0.011723	-0.876961	0.0217764	0.717542	0.108406	0.872374	0.0233932	-0.665103	0.149454	-0.2917	0.574861	-0.0716401	0.892724
ENSDARG00000076448	ENSDARG00000076448	serpinf2a	turquoise	-0.953468	0.00319744	0.933347	0.00651592	-0.78356	0.0651998	0.789363	0.061879	0.804329	0.0536849	-0.807435	0.0520516	-0.254503	0.626488	0.120308	0.820409
ENSDARG00000076483	ENSDARG00000076483	zgc:198241	turquoise	-0.927298	0.00773619	0.994588	4.385e-05	-0.680598	0.136735	0.652513	0.160142	0.603841	0.204326	-0.605734	0.202525	-0.313195	0.545568	-0.157489	0.76572
ENSDARG00000076534	ENSDARG00000076534	si:ch211-14a17.10	turquoise	-0.938469	0.00556255	0.996878	1.46065e-05	-0.705353	0.117435	0.661415	0.152552	0.641184	0.170025	-0.611136	0.197422	-0.332897	0.5191	-0.162887	0.75783
ENSDARG00000076559	ENSDARG00000076559	rb1cc1	turquoise	-0.957377	0.0026864	0.978644	0.000679267	-0.729245	0.100038	0.634491	0.175979	0.754131	0.0832456	-0.71129	0.112998	-0.225191	0.667923	-0.111213	0.833868
ENSDARG00000076563	ENSDARG00000076563	zgc:92249	turquoise	-0.963083	0.00201912	0.940316	0.00523701	-0.865733	0.0258312	0.80626	0.0526665	0.67093	0.144614	-0.516744	0.293875	-0.422068	0.404492	-0.100085	0.850374
ENSDARG00000076566	ENSDARG00000076566	kank3	turquoise	-0.925952	0.00802161	0.903414	0.0135427	-0.812933	0.0492182	0.916501	0.0101671	0.693439	0.126564	-0.709913	0.11402	-0.383976	0.452342	0.192851	0.714309
ENSDARG00000076721	ENSDARG00000076721	zgc:171686	turquoise	-0.87078	0.0239677	0.934556	0.00628425	-0.698763	0.122448	0.839382	0.0366254	0.641914	0.169381	-0.66366	0.150663	-0.532752	0.276476	0.0749966	0.887716
ENSDARG00000076735	ENSDARG00000076735	si:dkey-193c22.2	turquoise	-0.913847	0.0108138	0.810099	0.0506693	-0.79723	0.057505	0.635037	0.175491	0.862656	0.0269997	-0.770135	0.0731842	-0.0192388	0.971145	0.0754708	0.887009
ENSDARG00000076742	ENSDARG00000076742	cyth1a	turquoise	-0.923614	0.0085293	0.944788	0.00448834	-0.735908	0.0954076	0.868401	0.0248379	0.657628	0.155762	-0.76337	0.0773658	-0.335244	0.515973	0.18103	0.731421
ENSDARG00000076829	ENSDARG00000076829	ankib1b	turquoise	-0.948932	0.00384525	0.938485	0.00555979	-0.801431	0.0552298	0.863021	0.0268596	0.741339	0.0917053	-0.748304	0.0870535	-0.352851	0.492689	0.136507	0.796511
ENSDARG00000076838	ENSDARG00000076838	apom	turquoise	-0.916724	0.0101136	0.851812	0.0313125	-0.768167	0.07439	0.664727	0.149769	0.874245	0.022727	-0.817729	0.0468063	-0.105116	0.842907	0.0940117	0.859398
ENSDARG00000076847	ENSDARG00000076847	tnrc6c1	turquoise	-0.915606	0.0103829	0.990986	0.00012152	-0.642463	0.168897	0.585032	0.22257	0.648406	0.163695	-0.651598	0.160931	-0.268104	0.60748	-0.177745	0.73619
ENSDARG00000076924	ENSDARG00000076924	als2b	turquoise	-0.95795	0.00261513	0.976071	0.000852058	-0.783331	0.0653326	0.811816	0.0497876	0.646134	0.165676	-0.640003	0.17107	-0.364211	0.47784	-0.00440726	0.993389
ENSDARG00000076962	ENSDARG00000076962	gdpd5b	turquoise	-0.94967	0.00373591	0.935287	0.00614619	-0.761865	0.0783103	0.8159	0.0477195	0.74185	0.0913606	-0.82177	0.044818	-0.209779	0.689948	0.17734	0.736778
ENSDARG00000076981	ENSDARG00000076981	zgc:198329	turquoise	-0.87604	0.0220969	0.954482	0.00306068	-0.620163	0.189013	0.480756	0.334424	0.555604	0.25235	-0.477916	0.337705	-0.267067	0.608924	-0.347693	0.499477
ENSDARG00000077009	ENSDARG00000077009	wdfy4	turquoise	-0.920311	0.00927255	0.987167	0.000245983	-0.689085	0.129974	0.579947	0.227609	0.689404	0.129723	-0.578584	0.228967	-0.368551	0.472204	-0.265207	0.611517
ENSDARG00000077069	ENSDARG00000077069	srgn	turquoise	-0.896979	0.0153734	0.974544	0.00096377	-0.65075	0.161663	0.513781	0.29714	0.670384	0.145064	-0.551875	0.256229	-0.34322	0.505385	-0.319789	0.536668
ENSDARG00000077081	ENSDARG00000077081	slc38a10	turquoise	-0.859066	0.0283939	0.921174	0.00907532	-0.638365	0.172522	0.389908	0.444777	0.735633	0.0955969	-0.496896	0.315999	-0.332677	0.519393	-0.437216	0.385964
ENSDARG00000077169	ENSDARG00000077169	si:ch211-153b23.4	turquoise	-0.719987	0.106633	0.858393	0.028659	-0.407178	0.422987	0.390107	0.444523	0.248076	0.635519	-0.363048	0.479353	-0.175044	0.740115	-0.308745	0.551598
ENSDARG00000077297	ENSDARG00000077297	nbr1a	turquoise	-0.90367	0.0134722	0.965228	0.00179264	-0.654094	0.158782	0.779483	0.0675797	0.671078	0.144491	-0.811385	0.0500085	-0.309989	0.549911	0.134086	0.800076
ENSDARG00000077377	ENSDARG00000077377	PRIMA1	turquoise	-0.957936	0.00261682	0.927323	0.00773098	-0.776591	0.0692919	0.618163	0.190864	0.833344	0.0393469	-0.727837	0.101029	-0.158282	0.764559	-0.0856313	0.871867
ENSDARG00000077383	ENSDARG00000077383	anxa11a	turquoise	-0.857384	0.0290586	0.933705	0.00644691	-0.626336	0.183351	0.717446	0.108476	0.775997	0.0696462	-0.814848	0.0482485	-0.429651	0.395181	0.0769342	0.884826
ENSDARG00000077404	ENSDARG00000077404	ncoa3	turquoise	-0.950347	0.00363687	0.98075	0.000552259	-0.731822	0.0982359	0.651239	0.16124	0.600832	0.207202	-0.568731	0.238883	-0.244639	0.640363	-0.175837	0.738963
ENSDARG00000077407	ENSDARG00000077407	si:dkey-184p18.2	turquoise	-0.972335	0.00113741	0.884883	0.0191153	-0.886643	0.0185463	0.735028	0.0960136	0.869794	0.0243268	-0.68892	0.130104	-0.228506	0.663207	-0.00802516	0.987963
ENSDARG00000077424	ENSDARG00000077424	rassf10a	turquoise	-0.803072	0.0543524	0.952922	0.00327238	-0.461241	0.357201	0.569723	0.237877	0.442725	0.379301	-0.642583	0.168791	-0.270338	0.604372	-0.0819958	0.877282
ENSDARG00000077468	ENSDARG00000077468	si:ch73-206p6.1	turquoise	-0.891219	0.0171062	0.905965	0.0128481	-0.779265	0.0677086	0.832504	0.0397329	0.784132	0.0648688	-0.67733	0.139376	-0.548381	0.259884	0.0557859	0.916408
ENSDARG00000077540	ENSDARG00000077540	f2rl1.2	turquoise	-0.882491	0.0199013	0.956816	0.00275699	-0.649969	0.162339	0.77931	0.0676818	0.47159	0.345055	-0.605936	0.202334	-0.343151	0.505478	0.0253855	0.96193
ENSDARG00000077653	ENSDARG00000077653	rabl6b	turquoise	-0.949158	0.00381161	0.991028	0.000120392	-0.736696	0.094866	0.766822	0.0752185	0.684057	0.133961	-0.699291	0.122043	-0.357104	0.487113	-0.0121023	0.981847
ENSDARG00000077746	ENSDARG00000077746	AL935199.1	turquoise	-0.8168	0.0472691	0.925279	0.00816634	-0.531303	0.278035	0.462854	0.355298	0.408917	0.420813	-0.432947	0.391156	-0.23368	0.65586	-0.317423	0.539857
ENSDARG00000077777	ENSDARG00000077777	tmsb4x	turquoise	-0.813882	0.0487362	0.962911	0.00203789	-0.503194	0.308914	0.512196	0.298892	0.521635	0.288517	-0.563299	0.24442	-0.379112	0.458577	-0.243413	0.642092
ENSDARG00000077864	ENSDARG00000077864	rasgrp3	turquoise	-0.968884	0.00143727	0.96309	0.00201834	-0.836194	0.0380508	0.747209	0.0877777	0.794816	0.0588315	-0.622691	0.186686	-0.424455	0.401552	-0.115705	0.827216
ENSDARG00000077934	ENSDARG00000077934	tegt	turquoise	-0.916442	0.0101813	0.980051	0.000592954	-0.659159	0.154461	0.561802	0.245956	0.74126	0.0917589	-0.683665	0.134274	-0.289071	0.578471	-0.190874	0.717165
ENSDARG00000077982	ENSDARG00000077982	elf3	turquoise	-0.895378	0.0158461	0.992286	8.90215e-05	-0.623706	0.185755	0.587179	0.220455	0.635333	0.175226	-0.621961	0.187357	-0.353162	0.492281	-0.203078	0.699571
ENSDARG00000078065	ENSDARG00000078065	ftr96	turquoise	-0.897223	0.0153019	0.877605	0.0215541	-0.861657	0.0273843	0.731748	0.0982874	0.658384	0.155119	-0.341708	0.507388	-0.569831	0.237768	-0.258875	0.620362
ENSDARG00000078078	ENSDARG00000078078	lrfn4b	turquoise	-0.91447	0.0106602	0.962292	0.00210604	-0.718164	0.107954	0.589085	0.218585	0.822573	0.0444279	-0.639914	0.171148	-0.428531	0.396551	-0.229541	0.661735
ENSDARG00000078101	ENSDARG00000078101	si:dkey-121n8.3	turquoise	-0.861357	0.0275002	0.943421	0.00471121	-0.609192	0.199252	0.4591	0.359733	0.534729	0.274355	-0.441709	0.380526	-0.276656	0.595603	-0.379433	0.458163
ENSDARG00000078142	ENSDARG00000078142	SPAG9	turquoise	-0.935765	0.00605672	0.938779	0.00550731	-0.758906	0.0801823	0.641105	0.170094	0.875504	0.0222839	-0.732656	0.0976554	-0.324999	0.529665	-0.0969583	0.855018
ENSDARG00000078177	ENSDARG00000078177	cxcr3.1	turquoise	-0.859481	0.0282312	0.945344	0.0043993	-0.605106	0.203122	0.540025	0.268705	0.449855	0.370736	-0.444586	0.377059	-0.272389	0.601522	-0.284703	0.584483
ENSDARG00000078186	ENSDARG00000078186	tex2	turquoise	-0.937944	0.00565693	0.990273	0.000141448	-0.733226	0.09726	0.753041	0.0839519	0.640436	0.170686	-0.625103	0.184477	-0.404331	0.426554	-0.0760936	0.88608
ENSDARG00000078244	ENSDARG00000078244	si:ch211-197l9.2	turquoise	-0.965605	0.00175421	0.895045	0.0159454	-0.857356	0.0290696	0.87181	0.0235958	0.747397	0.0876535	-0.745811	0.0887064	-0.216613	0.680163	0.186001	0.724217
ENSDARG00000078270	ENSDARG00000078270	CU467961.1	turquoise	-0.947962	0.00399143	0.948257	0.00394677	-0.767867	0.074574	0.563595	0.244118	0.821799	0.0448042	-0.623725	0.185738	-0.279967	0.591021	-0.244664	0.640327
ENSDARG00000078301	ENSDARG00000078301	zgc:162255	turquoise	-0.785663	0.0639872	0.953542	0.00318742	-0.456812	0.362446	0.557655	0.250227	0.483637	0.331107	-0.616477	0.192429	-0.38997	0.444697	-0.135971	0.7973
ENSDARG00000078386	ENSDARG00000078386	dync1i2a	turquoise	-0.370661	0.469471	0.602409	0.205692	0.047743	0.92844	0.118077	0.823708	0.439621	0.383051	-0.764216	0.0768371	-0.119599	0.821456	0.0395372	0.940725
ENSDARG00000078389	ENSDARG00000078389	si:dkey-188i13.7	turquoise	-0.82266	0.0443857	0.89997	0.0145085	-0.565045	0.242636	0.746852	0.0880147	0.311891	0.547333	-0.574849	0.232707	-0.197893	0.707036	0.0936292	0.859967
ENSDARG00000078448	ENSDARG00000078448	gpr137ba	turquoise	-0.852812	0.0309023	0.973336	0.00105695	-0.556977	0.250928	0.510555	0.30071	0.566764	0.240883	-0.568275	0.239346	-0.330793	0.521909	-0.26576	0.610745
ENSDARG00000078541	ENSDARG00000078541	cers3a	turquoise	0.63367	0.176716	-0.746814	0.0880396	0.514014	0.296883	-0.357957	0.485998	-0.789822	0.0616199	0.389575	0.4452	0.756406	0.0817799	0.426118	0.399509
ENSDARG00000078547	ENSDARG00000078547	si:ch211-264f5.2	turquoise	-0.764688	0.0765425	0.851625	0.0313894	-0.517335	0.293226	0.664852	0.149664	0.197906	0.707017	-0.42971	0.395108	-0.193026	0.714058	-0.01293	0.980606
ENSDARG00000078603	ENSDARG00000078603	myo1hb	turquoise	-0.910743	0.0115946	0.962303	0.00210486	-0.722693	0.104687	0.710967	0.113237	0.523895	0.286054	-0.481384	0.3337	-0.393399	0.440343	-0.16985	0.747674
ENSDARG00000078652	ENSDARG00000078652	zfyve1	turquoise	-0.90433	0.0132913	0.959077	0.00247779	-0.618559	0.190497	0.714305	0.110773	0.629985	0.180037	-0.830347	0.0407319	-0.150372	0.776142	0.129703	0.806537
ENSDARG00000078675	ENSDARG00000078675	dock7	turquoise	-0.874876	0.0225047	0.811084	0.0501626	-0.835693	0.0382772	0.825299	0.0431147	0.880549	0.0205505	-0.711565	0.112794	-0.439969	0.382629	0.142468	0.787744
ENSDARG00000078676	ENSDARG00000078676	myrf	turquoise	-0.664686	0.149803	0.813796	0.0487798	-0.33743	0.513064	0.29129	0.575423	0.203017	0.699659	-0.319591	0.536934	-0.122353	0.817386	-0.361437	0.481453
ENSDARG00000078729	ENSDARG00000078729	ackr4a	turquoise	-0.962586	0.00207358	0.974056	0.0010009	-0.776906	0.0691044	0.65053	0.161854	0.80437	0.0536629	-0.664143	0.150257	-0.328224	0.525344	-0.161366	0.760052
ENSDARG00000078734	ENSDARG00000078734	myo1f	turquoise	-0.736168	0.0952285	0.875683	0.0222215	-0.433524	0.390454	0.331212	0.52135	0.356985	0.48727	-0.353342	0.492045	-0.242295	0.643669	-0.423399	0.402852
ENSDARG00000078745	ENSDARG00000078745	pnpla8	turquoise	-0.82114	0.0451254	0.963702	0.00195238	-0.484432	0.330194	0.527791	0.281825	0.50366	0.308393	-0.635554	0.175028	-0.274578	0.598484	-0.154355	0.770306
ENSDARG00000078829	ENSDARG00000078829	ccdc149a	turquoise	0.936634	0.00589573	-0.852584	0.0309953	0.828001	0.0418313	-0.767581	0.0747506	-0.857037	0.0291965	0.799298	0.0563794	0.159862	0.76225	-0.15871	0.763934
ENSDARG00000078856	ENSDARG00000078856	slc22a23	turquoise	-0.921401	0.00902385	0.922357	0.00880871	-0.77068	0.072852	0.796588	0.0578563	0.832451	0.0397572	-0.78115	0.0666021	-0.397785	0.434794	0.0962445	0.856079
ENSDARG00000078859	ENSDARG00000078859	g0s2	turquoise	-0.824813	0.0433475	0.966285	0.00168585	-0.52606	0.283701	0.637156	0.173598	0.616392	0.192507	-0.716676	0.109037	-0.436585	0.38673	-0.0469446	0.929635
ENSDARG00000078865	ENSDARG00000078865	cxxc5a	turquoise	-0.850608	0.0318098	0.980492	0.000567127	-0.537243	0.271668	0.594995	0.212827	0.550688	0.257469	-0.66038	0.153427	-0.327786	0.52593	-0.116508	0.826029
ENSDARG00000078875	ENSDARG00000078875	adm2b	turquoise	-0.956011	0.00285994	0.899523	0.0146363	-0.875998	0.0221113	0.77001	0.0732603	0.879454	0.020921	-0.673553	0.142457	-0.381651	0.455319	-0.0193052	0.971046
ENSDARG00000078882	ENSDARG00000078882	slc22a31	turquoise	-0.904283	0.013304	0.956356	0.00281566	-0.714094	0.110928	0.643594	0.167901	0.833674	0.0391959	-0.682508	0.1352	-0.47259	0.34389	-0.148395	0.779042
ENSDARG00000078894	ENSDARG00000078894	hemk1	turquoise	0.851295	0.0315255	-0.813186	0.0490894	0.815012	0.0481656	-0.748044	0.0872256	-0.912355	0.0111858	0.641807	0.169475	0.546965	0.26137	-0.000757361	0.998864
ENSDARG00000078912	ENSDARG00000078912	si:ch73-24k9.2	turquoise	-0.904277	0.0133059	0.963851	0.00193649	-0.644246	0.167329	0.541201	0.267457	0.54694	0.261396	-0.538	0.27086	-0.193003	0.714091	-0.249023	0.634187
ENSDARG00000078970	ENSDARG00000078970	il7r	turquoise	-0.950145	0.00366632	0.9448	0.00448648	-0.805716	0.0529526	0.595355	0.212478	0.833095	0.0394611	-0.572834	0.234733	-0.370076	0.470228	-0.272177	0.601817
ENSDARG00000078991	ENSDARG00000078991	NAT8	turquoise	-0.945999	0.00429535	0.94261	0.00484585	-0.773609	0.0710775	0.858527	0.0286061	0.711976	0.112489	-0.777766	0.0685939	-0.299092	0.564739	0.169655	0.74796
ENSDARG00000079009	ENSDARG00000079009	abca1b	turquoise	-0.766899	0.075171	0.895084	0.0159337	-0.463337	0.35473	0.402249	0.429169	0.347368	0.499905	-0.397093	0.435668	-0.213404	0.684753	-0.343022	0.505647
ENSDARG00000079128	ENSDARG00000079128	becn1	turquoise	-0.809566	0.0509446	0.960312	0.00233145	-0.528777	0.280759	0.572534	0.235036	0.530893	0.278476	-0.544434	0.264037	-0.485322	0.329173	-0.219985	0.675345
ENSDARG00000079155	ENSDARG00000079155	si:ch211-67f13.8	turquoise	-0.14281	0.787241	0.376103	0.462446	0.24832	0.635176	-0.222986	0.671064	-0.247346	0.636548	-0.0861964	0.871026	0.175052	0.740104	-0.357374	0.486761
ENSDARG00000079229	ENSDARG00000079229	znf414	turquoise	-0.894943	0.0159757	0.971406	0.00121474	-0.628397	0.181476	0.51378	0.297141	0.594783	0.213033	-0.549693	0.258509	-0.253821	0.627445	-0.286735	0.581684
ENSDARG00000079291	ENSDARG00000079291	rapgef3	turquoise	-0.92773	0.00764576	0.959953	0.00237356	-0.706772	0.116367	0.663026	0.151196	0.821464	0.0449673	-0.782154	0.066016	-0.305746	0.555672	-0.0336083	0.949607
ENSDARG00000079355	ENSDARG00000079355	flrt2	turquoise	-0.563559	0.244154	0.727536	0.101241	-0.328332	0.525199	0.156094	0.76776	0.735475	0.0957052	-0.463427	0.354624	-0.554785	0.253201	-0.463529	0.354503
ENSDARG00000079363	ENSDARG00000079363	lrig3	turquoise	-0.858842	0.0284819	0.937943	0.00565716	-0.615496	0.193341	0.689922	0.129316	0.385597	0.450271	-0.505528	0.306304	-0.27916	0.592138	-0.0825488	0.876458
ENSDARG00000079377	ENSDARG00000079377	arhgef38	turquoise	-0.822802	0.0443166	0.746287	0.0883899	-0.726309	0.102109	0.617329	0.191637	0.940871	0.00514108	-0.810967	0.0502226	-0.175359	0.739657	0.127434	0.809884
ENSDARG00000079462	ENSDARG00000079462	si:ch211-131k2.3	turquoise	0.902902	0.0136844	-0.831697	0.0401053	0.791748	0.0605376	-0.900504	0.0143568	-0.717985	0.108084	0.82181	0.0447984	0.170303	0.747015	-0.353766	0.491489
ENSDARG00000079501	ENSDARG00000079501	si:ch211-149l1.2	turquoise	-0.907497	0.0124395	0.885798	0.0188184	-0.754701	0.0828773	0.832063	0.0399362	0.416181	0.411771	-0.539623	0.269133	-0.160714	0.761004	0.100823	0.849278
ENSDARG00000079504	ENSDARG00000079504	mfn2	turquoise	-0.94613	0.00427484	0.969667	0.0013662	-0.7304	0.0992286	0.700572	0.121063	0.797244	0.0574971	-0.777317	0.0688607	-0.290515	0.576487	-0.00939586	0.985907
ENSDARG00000079636	ENSDARG00000079636	fam177a1	turquoise	-0.872149	0.0234737	0.983127	0.000424625	-0.601689	0.206382	0.552196	0.255894	0.656483	0.156738	-0.60488	0.203336	-0.408042	0.421906	-0.246581	0.637625
ENSDARG00000079637	ENSDARG00000079637	alpk2	turquoise	-0.802375	0.0547242	0.806645	0.0524647	-0.693323	0.126655	0.650805	0.161616	0.934541	0.00628712	-0.745583	0.0888583	-0.485713	0.328725	0.0239795	0.964038
ENSDARG00000079727	ENSDARG00000079727	sepp1b	turquoise	-0.972758	0.0011031	0.955295	0.00295309	-0.838175	0.0371621	0.742985	0.0905962	0.827201	0.0422093	-0.666708	0.148114	-0.379145	0.458534	-0.0809246	0.878878
ENSDARG00000079790	ENSDARG00000079790	CABZ01049925.1	turquoise	-0.854013	0.0304126	0.968953	0.00143094	-0.536363	0.272608	0.541466	0.267176	0.504747	0.307177	-0.612113	0.196504	-0.228223	0.663609	-0.169792	0.747759
ENSDARG00000079839	ENSDARG00000079839	arrdc1b	turquoise	-0.714189	0.110858	0.880098	0.020703	-0.37677	0.461588	0.379561	0.458	0.301125	0.561965	-0.418964	0.408325	-0.235155	0.653769	-0.308229	0.552299
ENSDARG00000079862	ENSDARG00000079862	kl	turquoise	-0.97277	0.00110214	0.968431	0.00147915	-0.820943	0.0452219	0.820535	0.0454215	0.708388	0.115157	-0.660999	0.152903	-0.361136	0.481846	0.00565868	0.991512
ENSDARG00000079884	ENSDARG00000079884	trim107	turquoise	-0.925948	0.00802249	0.949954	0.00369422	-0.747181	0.0877967	0.866733	0.0254567	0.659252	0.154382	-0.73192	0.098167	-0.375338	0.463432	0.143298	0.786524
ENSDARG00000079901	ENSDARG00000079901	si:ch73-15n24.1	turquoise	-0.883303	0.0196327	0.854811	0.0300896	-0.721387	0.105624	0.533198	0.275997	0.92251	0.00877438	-0.748942	0.0866331	-0.202829	0.699929	-0.0948002	0.858226
ENSDARG00000079931	ENSDARG00000079931	snx19b	turquoise	-0.895123	0.0159221	0.965386	0.00177642	-0.635636	0.174955	0.493038	0.320369	0.612506	0.196136	-0.538076	0.27078	-0.249739	0.633179	-0.314024	0.544447
ENSDARG00000080020	ENSDARG00000080020	il13ra1	turquoise	-0.939786	0.00532943	0.938062	0.00563572	-0.771939	0.0720865	0.685871	0.132517	0.873005	0.0231675	-0.74938	0.0863445	-0.339238	0.510664	-0.0462308	0.930703
ENSDARG00000080329	ENSDARG00000080329	AC024175.3	turquoise	-0.885589	0.0188861	0.980009	0.000595438	-0.638868	0.172076	0.575751	0.231801	0.730862	0.0989056	-0.636726	0.173981	-0.439162	0.383607	-0.225406	0.667617
ENSDARG00000080337	ENSDARG00000080337	AC024175.4	turquoise	-0.841921	0.0355084	0.9297	0.0072395	-0.585366	0.22224	0.461717	0.356639	0.807568	0.051982	-0.683883	0.1341	-0.365505	0.476157	-0.245174	0.639608
ENSDARG00000081869	ENSDARG00000081869	dre-mir-199-3	turquoise	-0.957872	0.00262482	0.985711	0.00030482	-0.727118	0.101537	0.644264	0.167314	0.73512	0.0959502	-0.699249	0.122075	-0.242108	0.643934	-0.11532	0.827786
ENSDARG00000083312	ENSDARG00000083312	AC024175.21	turquoise	-0.835366	0.0384253	0.934601	0.00627577	-0.584523	0.223072	0.4232	0.403097	0.756111	0.0819694	-0.580894	0.226666	-0.406874	0.423367	-0.357169	0.487029
ENSDARG00000086034	ENSDARG00000086034	pvrl1b	turquoise	-0.898143	0.0150338	0.975935	0.000861684	-0.639888	0.171171	0.557719	0.25016	0.560937	0.246844	-0.532628	0.276609	-0.282123	0.588043	-0.261862	0.616186
ENSDARG00000086057	ENSDARG00000086057	CABZ01112317.1	turquoise	-0.91615	0.0102515	0.855074	0.0299834	-0.792655	0.0600308	0.616272	0.19262	0.925424	0.00813498	-0.743953	0.0899472	-0.203631	0.698776	-0.0378323	0.943279
ENSDARG00000086098	ENSDARG00000086098	errfi1b	turquoise	-0.879702	0.0208369	0.863874	0.0265343	-0.757614	0.0810064	0.914207	0.0107249	0.436413	0.386939	-0.563411	0.244306	-0.28312	0.586667	0.194823	0.711463
ENSDARG00000086100	ENSDARG00000086100	cd302	turquoise	-0.780158	0.0671832	0.816624	0.0473571	-0.565381	0.242292	0.755154	0.0825849	0.194266	0.712267	-0.491435	0.32219	-0.0889899	0.866868	0.152628	0.772836
ENSDARG00000086300	ENSDARG00000086300	FAM107A	turquoise	-0.870199	0.0241791	0.921926	0.00890533	-0.653013	0.159711	0.46005	0.358609	0.842038	0.0354572	-0.639678	0.171357	-0.347821	0.499308	-0.292598	0.573628
ENSDARG00000086365	ENSDARG00000086365	BX004816.3	turquoise	-0.84734	0.0331786	0.964666	0.00185064	-0.550118	0.258064	0.481481	0.333588	0.549351	0.258867	-0.54451	0.263957	-0.299844	0.563712	-0.293751	0.572047
ENSDARG00000086421	ENSDARG00000086421	si:ch211-212k18.8	turquoise	-0.909228	0.0119853	0.857998	0.0288153	-0.797185	0.0575294	0.931117	0.00695379	0.50639	0.305342	-0.639188	0.171792	-0.196713	0.708736	0.260508	0.618077
ENSDARG00000086628	ENSDARG00000086628	stk19	turquoise	-0.788199	0.0625387	0.91378	0.0108303	-0.498364	0.314343	0.328052	0.525574	0.649861	0.162433	-0.520636	0.289608	-0.335708	0.515356	-0.422099	0.404453
ENSDARG00000086654	ENSDARG00000086654	cbln11	turquoise	-0.745756	0.0887426	0.886175	0.0186967	-0.420797	0.406059	0.342741	0.506019	0.364728	0.477167	-0.417184	0.410528	-0.1895	0.719153	-0.366447	0.474933
ENSDARG00000086691	ENSDARG00000086691	dnajc12	turquoise	-0.922988	0.00866798	0.961274	0.00222056	-0.730034	0.0994847	0.605903	0.202365	0.570461	0.237129	-0.452075	0.368084	-0.324288	0.530619	-0.291232	0.575502
ENSDARG00000086778	ENSDARG00000086778	pdgfba	turquoise	-0.860462	0.0278476	0.950649	0.00359318	-0.6315	0.178668	0.493093	0.320306	0.569336	0.23827	-0.423251	0.403034	-0.396531	0.436379	-0.395416	0.437789
ENSDARG00000086856	ENSDARG00000086856	stk35	turquoise	-0.702285	0.119757	0.769313	0.0736867	-0.506987	0.304677	0.757362	0.0811674	0.113084	0.831097	-0.403979	0.426996	-0.217327	0.679142	0.145554	0.783211
ENSDARG00000086985	ENSDARG00000086985	klc4	turquoise	-0.849189	0.032401	0.940843	0.00514579	-0.569656	0.237945	0.400549	0.431308	0.686125	0.132315	-0.580891	0.22667	-0.270213	0.604546	-0.348946	0.497825
ENSDARG00000086996	ENSDARG00000086996	si:ch73-234b20.5	turquoise	-0.916762	0.0101045	0.983026	0.000429735	-0.674874	0.141376	0.605302	0.202936	0.576369	0.231182	-0.543268	0.265268	-0.301452	0.561519	-0.229364	0.661987
ENSDARG00000087048	ENSDARG00000087048	si:dkey-165n16.1	turquoise	-0.893959	0.0162708	0.950643	0.00359398	-0.656928	0.156358	0.537627	0.271258	0.82302	0.0442114	-0.710243	0.113775	-0.329249	0.523972	-0.188154	0.7211
ENSDARG00000087084	ENSDARG00000087084	hcar1-4	turquoise	-0.977856	0.000730118	0.971373	0.00121757	-0.812832	0.0492693	0.807539	0.0519972	0.666889	0.147963	-0.650291	0.162061	-0.300189	0.563242	0.000907616	0.998639
ENSDARG00000087120	ENSDARG00000087120	slc5a8	turquoise	-0.956616	0.00278239	0.929033	0.00737573	-0.834523	0.0388086	0.67059	0.144894	0.882232	0.0199872	-0.650162	0.162172	-0.36929	0.471246	-0.146161	0.78232
ENSDARG00000087152	ENSDARG00000087152	sowahd	turquoise	-0.87773	0.0215108	0.967904	0.00152866	-0.590962	0.21675	0.529235	0.280264	0.525124	0.284717	-0.554845	0.253138	-0.226605	0.66591	-0.239218	0.648017
ENSDARG00000087197	ENSDARG00000087197	ros1	turquoise	-0.714564	0.110582	0.770648	0.0728714	-0.493446	0.319906	0.165351	0.754234	0.801827	0.0550174	-0.520433	0.289831	-0.21933	0.67628	-0.459076	0.359761
ENSDARG00000087327	ENSDARG00000087327	cbx8a	turquoise	-0.832868	0.0395656	0.943024	0.00477687	-0.544672	0.263785	0.42132	0.405414	0.717003	0.108799	-0.630667	0.17942	-0.330909	0.521754	-0.302794	0.55969
ENSDARG00000087452	ENSDARG00000087452	peli3	turquoise	-0.928507	0.0074841	0.964189	0.00190065	-0.736809	0.0947885	0.696064	0.124528	0.530024	0.279413	-0.49281	0.320628	-0.32123	0.534728	-0.17213	0.744354
ENSDARG00000087471	ENSDARG00000087471	CABZ01072827.1	turquoise	-0.884904	0.0191081	0.936821	0.00586125	-0.671801	0.143896	0.454252	0.365488	0.791445	0.0607071	-0.5676	0.240032	-0.350946	0.495192	-0.359707	0.48371
ENSDARG00000087525	ENSDARG00000087525	CABZ01045212.1	turquoise	-0.922739	0.00872329	0.902029	0.0139274	-0.767442	0.0748359	0.902481	0.0138013	0.528177	0.281408	-0.67854	0.138396	-0.211718	0.687169	0.223445	0.670411
ENSDARG00000087574	ENSDARG00000087574	nox1	turquoise	-0.939222	0.00542866	0.962092	0.00212828	-0.742663	0.0908129	0.823423	0.0440165	0.555177	0.252793	-0.646975	0.164942	-0.284642	0.584569	0.0621528	0.906891
ENSDARG00000087575	ENSDARG00000087575	zmp:0000000912	turquoise	-0.84622	0.0336541	0.922649	0.00874341	-0.60457	0.203632	0.757991	0.0807654	0.364373	0.477629	-0.560638	0.247151	-0.270756	0.603791	0.0439468	0.934122
ENSDARG00000087596	ENSDARG00000087596	si:ch73-95l15.5	turquoise	-0.921732	0.00894901	0.963767	0.00194544	-0.693349	0.126635	0.757791	0.0808933	0.750427	0.0856575	-0.815498	0.0479212	-0.31705	0.540361	0.0923734	0.861834
ENSDARG00000087599	ENSDARG00000087599	TENM3	turquoise	-0.301215	0.561842	0.61717	0.191785	0.0787973	0.882049	0.148516	0.778863	0.0540025	0.919075	-0.302928	0.559507	-0.45155	0.36871	-0.247043	0.636973
ENSDARG00000087611	ENSDARG00000087611	FP085398.1	turquoise	-0.921134	0.00908445	0.983314	0.000415325	-0.699191	0.12212	0.590207	0.217487	0.751917	0.0846835	-0.620105	0.189067	-0.397117	0.435637	-0.239746	0.647271
ENSDARG00000087647	ENSDARG00000087647	sept7a	turquoise	-0.657917	0.155516	0.816452	0.0474428	-0.311356	0.548058	0.288404	0.579388	0.204246	0.697891	-0.359824	0.483558	-0.103411	0.845436	-0.328477	0.525005
ENSDARG00000087709	ENSDARG00000087709	FAT3 (1 of many)	turquoise	0.770933	0.0726978	-0.815182	0.0480801	0.693907	0.1262	-0.811647	0.0498744	-0.727733	0.101102	0.595169	0.212659	0.701074	0.12068	-0.0685172	0.897385
ENSDARG00000087749	ENSDARG00000087749	ccser2a	turquoise	-0.925681	0.00807967	0.888741	0.0178793	-0.833667	0.0391991	0.806256	0.052669	0.869029	0.0246069	-0.725398	0.102756	-0.419853	0.407226	0.0698009	0.895469
ENSDARG00000087814	ENSDARG00000087814	MFRP	turquoise	-0.36279	0.479689	0.631718	0.178472	-0.0276553	0.958528	0.453831	0.365989	-0.00354782	0.994678	-0.419131	0.408118	-0.439221	0.383535	0.101169	0.848764
ENSDARG00000087854	ENSDARG00000087854	zgc:112234	turquoise	-0.929516	0.00727694	0.938846	0.00549535	-0.680342	0.136941	0.544027	0.264466	0.609761	0.198716	-0.624759	0.184791	-0.03737	0.943971	-0.159812	0.762323
ENSDARG00000087887	ENSDARG00000087887	phf21b	turquoise	-0.66729	0.147629	0.777063	0.0690115	-0.276678	0.595573	0.274478	0.598622	0.289296	0.578162	-0.610218	0.198286	0.210845	0.688419	-0.0879795	0.868371
[truncated: 469 more rows]

## Sheet: Female.weight.geneInfo
	substanceBXH	geneSymbol	moduleColor	weight	weight.1	MM.blue	p.MM.blue	MM.turquoise	p.MM.turquoise	MM.brown	p.MM.brown	MM.yellow	p.MM.yellow	MM.red	p.MM.red	MM.green	p.MM.green	MM.grey	p.MM.grey
[truncated: 2,399 more rows]

[truncated: 2 more sheets: Male.length.geneInfo, Male.weight.geneInfo]
